# Supplementary material for: Non-enzymatic Stereoselective S-glycosylation of Polypeptides and Proteins
Source: Research Square preprint supplement (doi:10.21203/rs.3.rs-92519/v1), 2020-10-26
Supplement: Supplementary file 1 [file c155d0d9868cbce380568549.pdf]

**Supplementary Information**  
for  
**Non-enzymatic Stereoselective *S*-glycosylation of  
Polypeptides and Proteins**

Li-Qiang Wan<sup>†1,2</sup>, Xia Zhang<sup>†1,2</sup>, Shi-Yang Xu<sup>1,2</sup>, Rong Shi<sup>1,2</sup>, Li-Fan Deng<sup>1,2</sup>, Jin-Ge Cao<sup>1,2</sup>, Li Zhou<sup>1</sup>, Yanqiu Gong<sup>1</sup>, Xiaoling Shu<sup>1</sup>, Haiyan Ren<sup>1</sup>, Lunzhi Dai<sup>1</sup>, Shiqian Qi<sup>1</sup>,  
Dawen Niu<sup>\*1,2</sup>

Correspondence to: niudawen@scu.edu.cn

**Table of Contents**

|                                                                |      |
|----------------------------------------------------------------|------|
| 1. General Information                                         | S2   |
| 2. General Procedures for <i>S</i> -Glycosylation of Peptides  | S5   |
| 3. Optimization Tables                                         | S7   |
| 4. Experimental Details of Kinetic Studies                     | S10  |
| 5. Synthesis and Characterization Data of Glycosyl Donors      | S13  |
| 6. Synthesis and Characterization Data of Disulfides in Fig. 2 | S22  |
| 7. Synthesis and Characterization Data for Products in Fig. 2  | S27  |
| 8. Synthesis and Characterization Data for Products in Fig. 3  | S37  |
| 9. Glycosylation of Affibody                                   | S48  |
| 10. Glycosylation of NSP7                                      | S58  |
| 11. Details of Computational Studies                           | S68  |
| 12. NMR Spectra                                                | S87  |
| 13. SupplementaryReferences                                    | S169 |

## 1. General Information

Flash column chromatography was performed using silica gel (300-400 mesh) purchased from Qindao Haiyang. Reverse-phase flash column chromatography was performed on Biotage Isolera One equipped with a Spherigel C18 column (25-40  $\mu\text{m}$ , 100Å, 114 mm  $\times$  12.4 mm). The preparative reverse-phase-HPLC separation was performed on a Prep-HPLC system (NS4600 series, Hanbon Sci. & Tech.) using a Dubhe C18 column (10  $\mu\text{m}$ , 100Å, 250  $\times$  10 mm) at 25  $^{\circ}\text{C}$  and a flow rate of 3 mL/min with MeCN/0.1% TFA and water/0.1% TFA as eluents. Reaction solvents (e.g.,  $\text{CH}_3\text{CN}$ ,  $\text{H}_2\text{O}$ , THF, and  $\text{CH}_2\text{Cl}_2$ ) and deuterated solvents were purchased from Energy Chemicals and used as received. Eosin Y was purchased from Sigma-Aldrich and used as received. Ir-based photosensitizers were prepared according to literature procedures.<sup>1</sup> Peptides used in this study were purchased from Dechi Bio (Shanghai, China) or GL Biochem (Shanghai) Ltd., where they were synthesized following conventional solid phase peptide synthesis technologies. The light source was provided by WATTECS WP-TEC-1020 parallel reactor (Figure S1). The distance between the bottom of reaction vial to light bulb is ca. 0.5 cm.

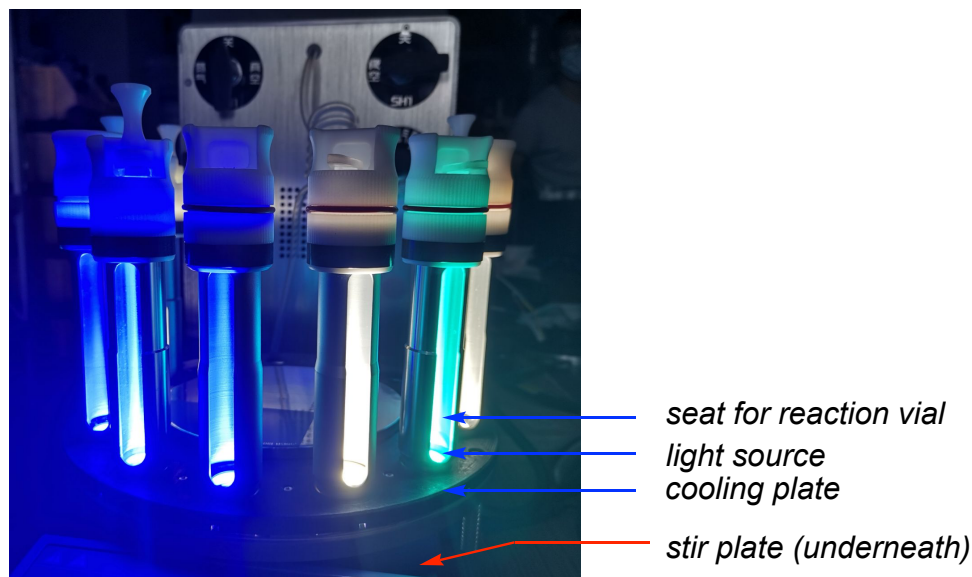

**Figure S1 | Photoreactor used in this study.**

All new small molecules were characterized by  $^1\text{H}$  and  $^{13}\text{C}$  NMR spectroscopy and high-resolution mass spectroscopy (HR-MS). NMR spectra were recorded on a Bruker AMX 400, 600 or 800 spectrometer and were calibrated using TMS (0.00 ppm) or residual non-deuterated solvent as an internal reference ( $\text{CDCl}_3$ : 7.26 ppm for  $^1\text{H}$  NMR and 77.16 ppm for  $^{13}\text{C}$  NMR;  $\text{DMSO}-d_6$ : 2.50 ppm for  $^1\text{H}$  NMR and 49.50 ppm for  $^{13}\text{C}$  NMR), and the tabulated data were reported in ppm. HR-MS spectra were recorded on a Waters Q-TOF Premier.

### **LC-MS/MS analysis of polypeptide products**

The peptides were first desalted using C18 ZipTip (Millipore) according to the manufacturer's instructions. After vacuum freeze drying, the peptides were lyophilized and suspended in buffer A (2%  $\text{CH}_3\text{CN}$ , 0.1% TFA). LC-MS/MS analysis was performed using an EASY-nLC 1000 nanoflow LC instrument coupled to a Q Exactive™ Quadrupole-Orbitrap mass spectrometer (Thermo Fisher Scientific). An in-house packed reverse-phase C18 trap column (2 cm length  $\times$  360  $\mu\text{m}$  OD  $\times$  75  $\mu\text{m}$  ID, 5  $\mu\text{m}$  particle, DIKMA) and in-house packed reversed-phase C18 analytical column (30 cm length  $\times$  360  $\mu\text{m}$  OD  $\times$  75  $\mu\text{m}$  ID, 3  $\mu\text{m}$  particle, DIKMA) were used in peptide separation. Mobile phase A was 100/0.1% water/formic acid (v/v) and mobile phase B was 95/5/0.1% acetonitrile/water/formic acid (v/v/v). LC gradient elution condition was initially 10% B for 2 min, then raised from 10% to 33% B in 28 min, from 33% to 47% B in 8 min, from 47% to 90% B in 5 min, and held at 90% B for the final 2 min, with a flow rate of 330 nL/min. Data dependent acquisition (DDA) was performed in positive ion mode. MS spectra were acquired from 350  $m/z$  to 1800  $m/z$  with a resolution of 70,000 at  $m/z = 200$ . The automatic gain control value was set at  $3\text{e}6$ , with maximum fill time of 20 ms. For MS/MS scans, the top 20 most intense parent ions were selected with a 1.6  $m/z$  isolation window and fragmented with a normalized collision energy of 27%. The AGC value for MS/MS was set to a target value of  $1\text{e}6$ , with a maximum fill time of 64 ms. Parent ions with a charge state of  $z = 1$  or with unassigned charge states were excluded from fragmentation and the intensity threshold for selection was set to  $3.1\text{e}5$ . Fragmentation was performed with an HCD collision cell (mass resolution 17,000 at  $m/z = 200$ ). A dynamic exclusion period of 60 s was used after one repeat count.

All raw files were analyzed and searched using Sequest-HT algorithm (version 1.17) by Proteome Discoverer (PD2.3, Thermo Fisher Scientific). The searches were against the peptide sequences using a reverse decoy database with a false discovery rate (FDR)  $< 1\%$ . Searches were carried out with a precursor peptide mass tolerance of 10 ppm and a fragment ion mass tolerance of 0.02 Da. Oxidation of methionine were set as variable modifications.

### Determination of the configuration of the newly formed glycosidic bonds

The stereochemistry of the newly formed glycosidic bonds could be readily determined by coupling constant analysis. For 1,2-*cis* products,  $J(\text{H1-H2})$  falls within 5–6 Hz, whereas for 1,2-*trans* products,  $J(\text{H1-H2})$  falls within 9–10 Hz. For all products except the glycosylated protein, the  $J(\text{H1-H2})$  determined indicate formation of 1,2-*cis* (axially configured) products.

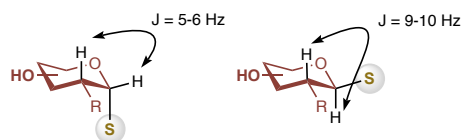

**Figure S2 | Determination of the stereochemistry of *S*-glycosidic bonds.**

## 2. General Procedures for *S*-Glycosylation of Peptides

### 2.1 General Procedure I (for products in Fig. 3, top)

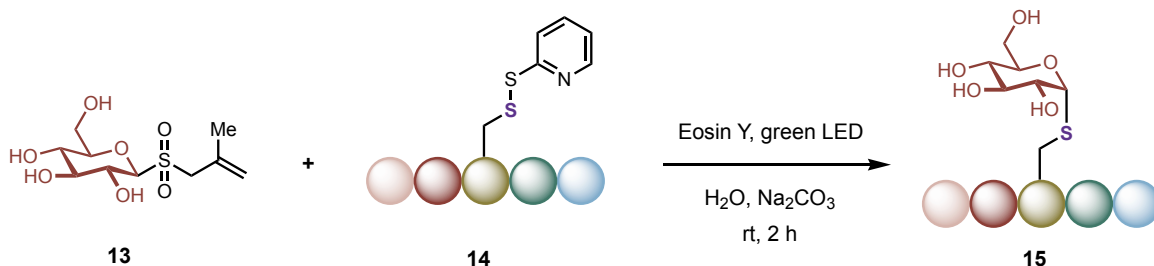

Under  $\text{N}_2$  atmosphere, the glycosyl donor **13**, disulfide **14**, Eosin Y, and solvent (0.05 M aqueous solution of  $\text{Na}_2\text{CO}_3$ ) were sequentially added to an 8 mL screw-capped glass vial containing a magnetic stirring bar. The reaction vial was then capped and placed onto the WATTECS WP-TEC-1020 parallel reactor and irradiated with green LED for 2 h. The resulting solution was subjected to reverse phase HPLC for purification.

### 2.2 General Procedure II (for products in Fig. 3, bottom)

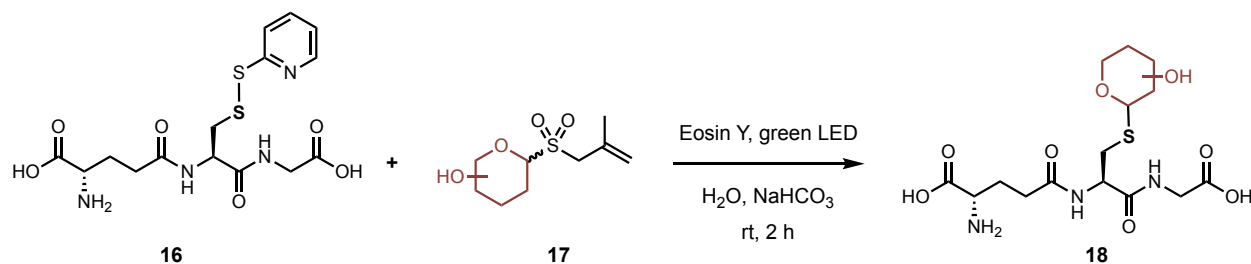

Under  $\text{N}_2$  atmosphere, the glycosyl donor **17**, disulfide **16**, Eosin Y, and solvent (0.1 M aqueous solution of  $\text{NaHCO}_3$ ) were sequentially added to a 8 mL screw-capped glass vial containing a magnetic stirring bar. The reaction vial was then capped and placed onto the WATTECS WP-TEC-1020 parallel reactor and irradiated with green LED for 2h. The resulting solution was subjected to reverse phase HPLC for purification.

### 2.3 General Procedure III (for products in Fig. 4)

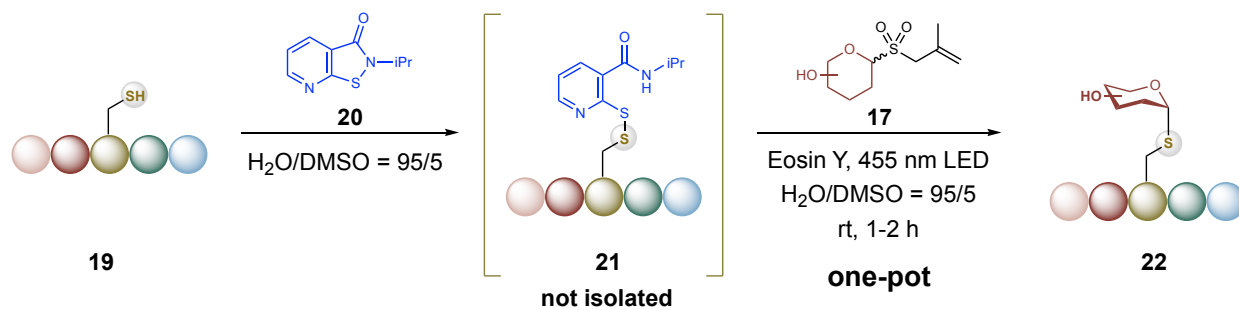

Under  $\text{N}_2$  atmosphere, the Cys-containing peptide **27** was added to a “glycosylation kit” made from 2-isopropylisothiazolo[5,4-b]pyridin-3(2H)-one **28**, glycosyl donor **25**, Eosin Y, and 95/5  $\text{H}_2\text{O}/\text{DMSO}$ . The tube was capped and held at room temperature for 5 min before placed onto the WATTECS WP-TEC-1020 parallel reactor and irradiated with blue LED for 2 h. The resulting solution was subjected to reverse phase HPLC for purification.

### 3. Optimization Tables

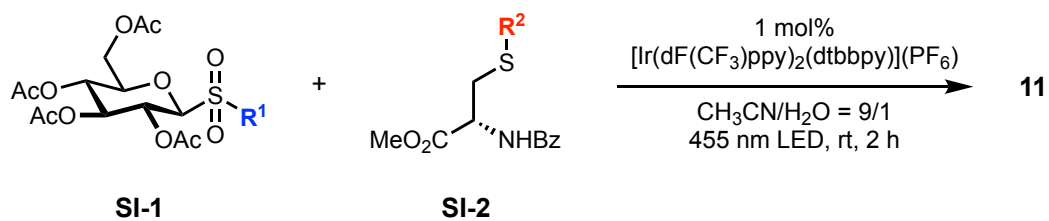

| Entry | R <sup>1</sup> | R <sup>2</sup> | Conv. (%) | Yield (%) |
|-------|----------------|----------------|-----------|-----------|
| 1     |                |                | 100       | 98        |
| 2     |                |                | 82        | 72        |
| 3     |                |                | 0         | 0         |
| 4     |                |                | 100       | 86        |
| 5     |                |                | 100       | 95        |

**Figure S3. Condition Optimization: Impact of Leaving Groups on Each Substrate.**

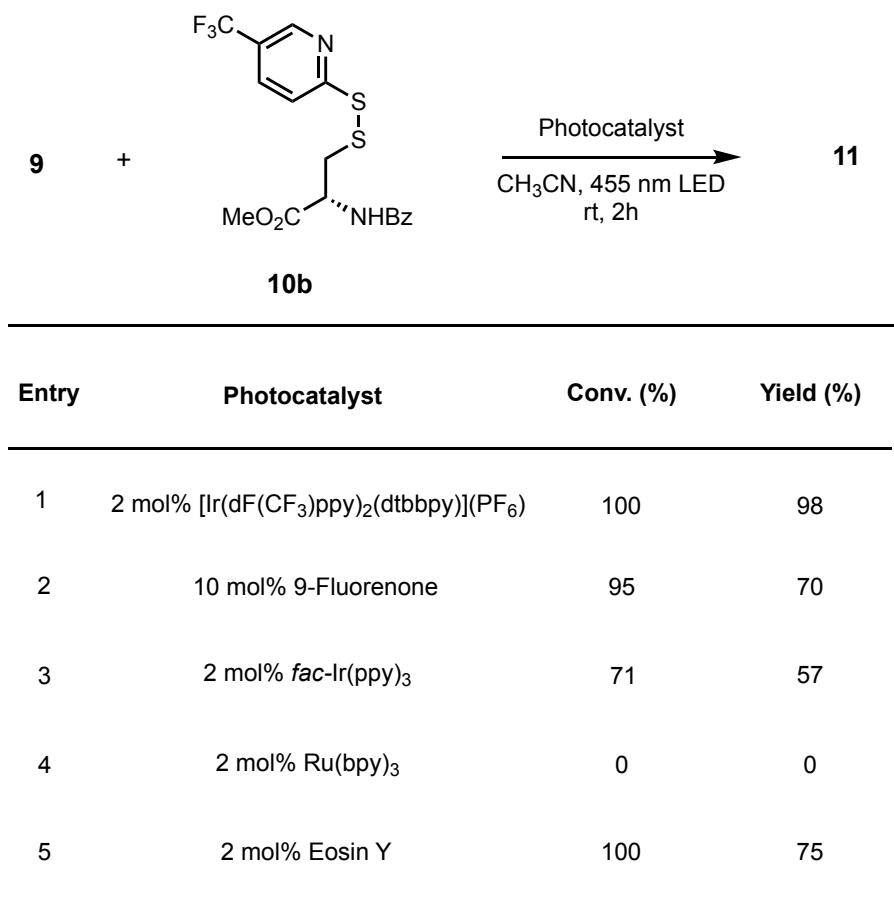

**Figure S4. Condition Optimization: Impact of Photocatalysts.**

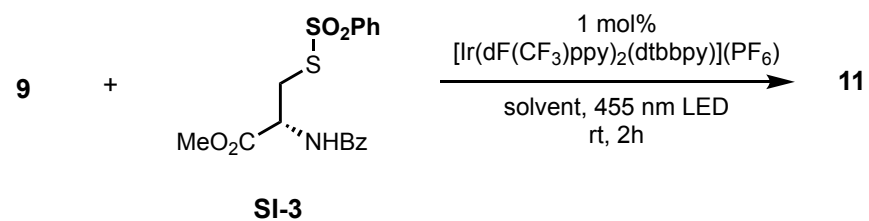

| Entry | Solvent | Conv. (%) | Yield (%) |
|-------|---------|-----------|-----------|
| 1     | MeCN    | 100       | 95        |
| 2     | 1,2-DCE | 89        | 81        |
| 3     | EtOAc   | 75        | 62        |
| 4     | glyme   | 92        | 70        |
| 5     | THF     | 73        | 61        |
| 6     | MeOH    | 90        | 64        |
| 7     | DMF     | 95        | 74        |
| 8     | DMSO    | 95        | 75        |

**Figure S5. Condition Optimization: Impact of Solvent Properties.**

## 4. Experimental Details of Kinetic Studies

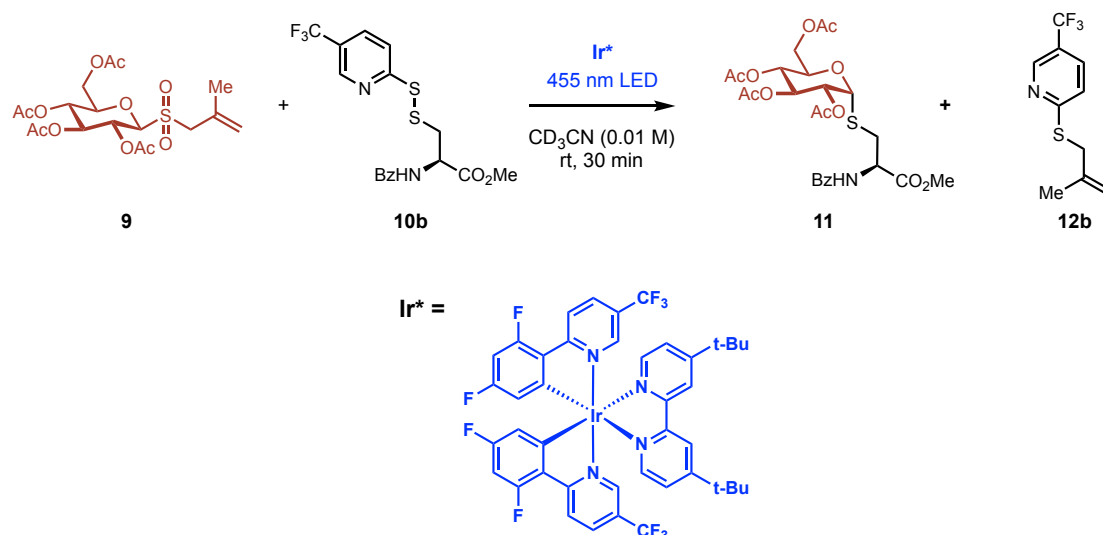

### 4.1 Procedures for “same excess” and “different excess” experiments (Fig. 2C, left):

#### Step I: Prepare stock solutions.

**Solution A:** Catalyst  $\text{Ir}^*$  (2.8 mg, 0.0025 mmol) was dissolved in  $\text{CD}_3\text{CN}$  (400  $\mu\text{L}$ ).

**Solution B:** Compound **9** (5.5 mg, 0.012 mmol) was dissolved in  $\text{CD}_3\text{CN}$  (1000  $\mu\text{L}$ ).

**Solution C:** Compound **10b** (5.0 mg, 0.012 mmol) was dissolved in  $\text{CD}_3\text{CN}$  (1000  $\mu\text{L}$ ).

**Solution D:** Compound **9** (9.2 mg, 0.020 mmol), **10b** (10.0 mg, 0.024 mmol),  $\text{PhCF}_3$  (2.9 mg, 0.020 mmol), and 16  $\mu\text{L}$  solution **A** were dissolved in  $\text{CD}_3\text{CN}$  (984  $\mu\text{L}$ ).

#### Step II: Prepare reaction solutions.

Tube **I** ( $[\mathbf{9}] = 0.010 \text{ M}$ ,  $[\mathbf{10b}] = 0.012 \text{ M}$ ): 250  $\mu\text{L}$  of **Solution D** and 250  $\mu\text{L}$   $\text{CD}_3\text{CN}$  were added to a NMR tube.

Tube **II** ( $[\mathbf{9}] = 0.010 \text{ M}$ ,  $[\mathbf{10b}] = 0.015 \text{ M}$ ): 250  $\mu\text{L}$  of **Solution D**, 125  $\mu\text{L}$  **Solution C** and 125  $\mu\text{L}$   $\text{CD}_3\text{CN}$  were added to a NMR tube.

Tube **III** ( $[\mathbf{9}] = 0.013 \text{ M}$ ,  $[\mathbf{10b}] = 0.015 \text{ M}$ ): 250  $\mu\text{L}$  of **Solution D**, 125  $\mu\text{L}$  **Solution B** and 125  $\mu\text{L}$  **Solution C** were added to a NMR tube.

#### Step III: Monitor reaction progress.

- 1) At time 0, tube **I**, tube **II**, and tube **III** were recorded by  $^{19}\text{F}$  NMR respectively.
- 2) Tube **I**, tube **II**, and tube **III** were bundled together with a rubber rope, and exposed to the same 10 W blue LED bulb for 30 seconds. Each tube was then recorded by  $^{19}\text{F}$  NMR.

- 3) The above operation was repeated for 10 times at 30 seconds intervals, and then 5 times at 1 minute intervals.

**Discussion:**

The only difference between reactions in Tube II and Tube III is the initial concentration of compound **9**. However, these two reactions have almost identical progress curve, suggesting the concentration of **9** is not impacting the reaction rate. To put it differently, the reaction has a zeroth order of dependence on [**9**].

In all of the three reactions,  $\ln[\mathbf{10b}]$  decreases linearly with time. This is consistent with the following scenario:

$$d[\mathbf{10b}]/dt = C \cdot [\mathbf{10b}], \text{ where } C \text{ is a constant.}$$

$$\text{thus, } d[\mathbf{10b}]/[\mathbf{10b}] = C \cdot dt,$$

therefore,  $\ln[\mathbf{10b}] = C \cdot t$ , which is in agreement with our experimental observation.

$$\text{Since } d[\mathbf{11}]/dt = -d[\mathbf{10b}]/dt,$$

$$d[\mathbf{11}]/dt = -C \cdot [\mathbf{10b}].$$

Consequently, the product formation has a first order of dependence on [**10b**].

## 4.2 Procedures for determining the relationship between rate and $[\text{Ir}^*]$ (Fig. 2C, right):

**Step I:** Prepare stock solutions.

**Solution E:** Catalyst  $\text{Ir}^*$  (2.8 mg, 0.0025 mmol) was dissolved in  $\text{CD}_3\text{CN}$  (2000  $\mu\text{L}$ ).

**Solution F:** Compound **9** (18.4 mg, 0.040 mmol), **10** (20.0 mg, 0.048 mmol) and  $\text{PhCF}_3$  (as an internal standard, 5.8 mg, 0.040 mmol) were dissolved in  $\text{CD}_3\text{CN}$  (2000  $\mu\text{L}$ ).

**Step II:** Prepare reaction solutions.

Tube **IV** (0 mol %  $\text{Ir}^*$ ): 250  $\mu\text{L}$  of solvent **F** and 250  $\mu\text{L}$   $\text{CD}_3\text{CN}$  were added to a NMR tube.

Tube **V** (0.25 mol %  $\text{Ir}^*$ ): 250  $\mu\text{L}$  of solvent **F**, 10  $\mu\text{L}$  solvent **E** and 240  $\mu\text{L}$   $\text{CD}_3\text{CN}$  were added to a NMR tube.

Tube **VI** (0.5 mol %  $\text{Ir}^*$ ): 250  $\mu\text{L}$  of solvent **F**, 20  $\mu\text{L}$  solvent **E** and 230  $\mu\text{L}$   $\text{CD}_3\text{CN}$  were added to a NMR tube.

Tube **VII** (1 mol %  $\text{Ir}^*$ ): 250  $\mu\text{L}$  of solvent **F**, 40  $\mu\text{L}$  solvent **E** and 210  $\mu\text{L}$   $\text{CD}_3\text{CN}$  were added to a NMR tube.

**Step III:** Monitor reaction progress.

- 1) At time 0, tube **IV**, tube **V**, tube **VI** and tube **VII** were recorded by  $^{19}\text{F}$  NMR respectively.
- 2) Tube **IV**, tube **V**, tube **VI** and tube **VII** were bundled together with a rubber rope, and exposed to the same 10 W blue LED bulb for 30 seconds. Each tube was then recorded by  $^{19}\text{F}$  NMR.
- 3) The above step was repeated for 10 times at 30 seconds intervals.

The rate constant ( $-C$ ) of each reaction could be determined by plotting  $\ln[\mathbf{10}]$  against  $t$ . Plotting  $-C$  against catalyst loading gave the data shown in Fig. S2. Therefore, the reaction rate constant is increasing, but less than linearly with the catalyst loading.

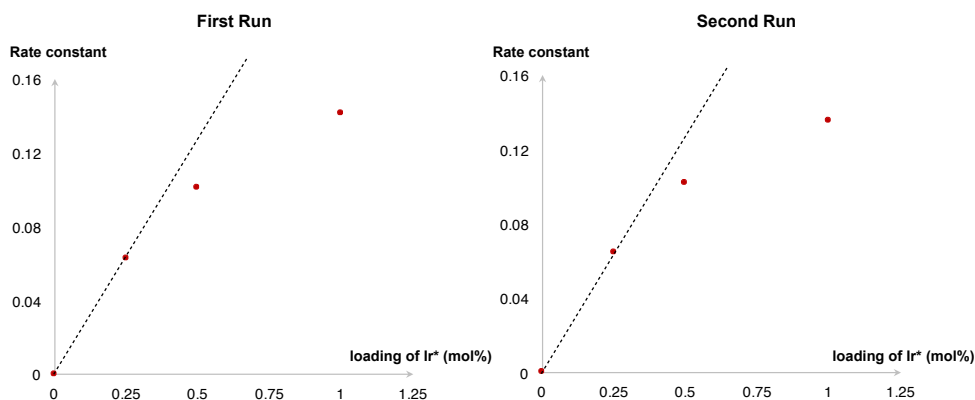

**Fig. S6. Relationship between rate constant and photocatalyst loading. For reference, the straight dashed line indicates a (hypothetical) linear relationship.**

## 5. Synthesis and Characterization Data of Glycosyl Donors

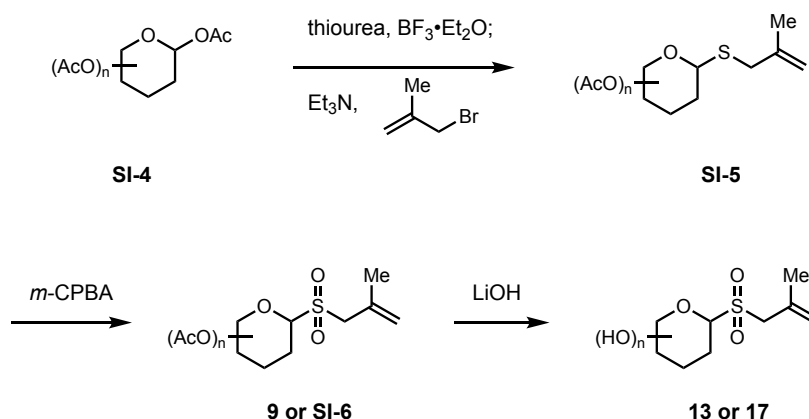

### General Procedures IV:

**Step 1:** To a 100 mL round bottom flask containing **SI-4** (10 mmol) and 25 mL  $\text{CH}_3\text{CN}$  thiourea (15 mmol, 1.1g) and  $\text{BF}_3\cdot\text{Et}_2\text{O}$  (30 mmol, 3.75 mL) were added sequentially. The reaction solution was refluxed for 8 h, until **SI-4** was fully consumed as indicated by TLC. To the resulting solution was added  $\text{Et}_3\text{N}$  (30 mmol, 5.2 mL), 3-bromo-2-methyl propene (15 mmol, 1.5 mL). The resulting solution was stirred at 80 °C and monitored by TLC analysis. The resulting solution was concentrated and dissolved in  $\text{CH}_2\text{Cl}_2$ , washed with  $\text{H}_2\text{O}$ . The organic layer was separated and washed with brine, dried, and concentrated to give **SI-5** as a crude mixture, which is used for the next step without further purification.

**Step 2:** **SI-5** was dissolved in 20 mL  $\text{CH}_2\text{Cl}_2$  and cooled at 0 °C. *m*-CPBA (25 mmol, 4.3g) was slowly added to the reaction solution with stirring. The mixture was allowed to stir for an additional 1 h at room temperature. The resulting mixture was filtered, and the filtrate was washed with  $\text{H}_2\text{O}$ . The organic layer was separated and washed with saturated  $\text{Na}_2\text{SO}_3$  solution, saturated  $\text{NaHCO}_3$  solution, brine respectively, then dried and concentrated. The residue was subjected to flash chromatography to give the sulfone **SI-6**.

**Step 3:** **SI-6** was dissolved in 20 mL MeOH at 0 °C, to which LiOH (5 mmol, 120 mg) was added. The reaction was allowed to stir at 0 °C for 4 h. Silica gel was added to the mixture, which is then concentrated in vacuo. The resulting mixture was dry-loaded onto silica gel column, and eluted to give the corresponding polyols.

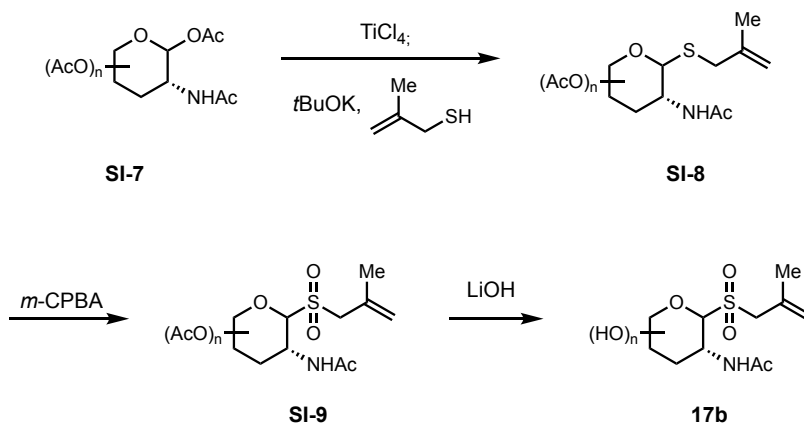

### General Procedures V:

**Step 1:** To a 25 mL round bottom flask containing **SI-7** (1.3 mmol) and 15 mL  $\text{CHCl}_3$  was added  $\text{TiCl}_4$  (5 mmol, 0.6 mL). The reaction solution was refluxed for 8 h, until **SI-7** was fully consumed as indicated by TLC. The resulting solution was concentrated. To the resulting residue was added *t*BuOK (0.89 mmol, 100 mg), 2-methylprop-2-ene-1-thiol (0.89 mmol, 93  $\mu\text{L}$ ) and 10 mL DMF. The resulting solution was stirred at room temperature and monitored by TLC analysis. The resulting solution was concentrated and dissolved in EtOAc, washed with  $\text{H}_2\text{O}$ . The organic layer was separated and washed with brine, dried, and concentrated. The residue was purified by flash chromatography to give **SI-8**.

**Step 2:** **SI-8** was dissolved in 5 mL  $\text{CH}_2\text{Cl}_2$  and cooled at 0  $^\circ\text{C}$ . *m*-CPBA (0.5 mmol, 86 mg) was slowly added to the reaction solution with stirring. The mixture was allowed to stir for an additional 1 h at room temperature. The resulting mixture was filtered, and the filtrate was washed with  $\text{H}_2\text{O}$ . The organic layer was separated and washed with saturated  $\text{Na}_2\text{SO}_3$  solution, saturated  $\text{NaHCO}_3$  solution, brine respectively, then dried and concentrated. The residue was purified by flash chromatography to give **SI-9**.

**Step 3:** **SI-9** was dissolved in 5 mL MeOH, to which LiOH (0.25 mmol, 6 mg) was added. The reaction was allowed to stir at room temperature for 4h. Silica gel was added to the mixture, which is then concentrated in vacuo. The resulting mixture was dry-loaded onto a silica gel column, and purified to afford to corresponding polyols.

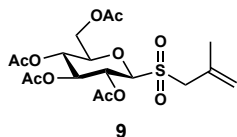

### 1-((2-Methylallyl)sulfonyl)-2,3,4,6-tetra-*O*-acetyl- $\beta$ -D-glucopyranoside (**9**)

**9** was prepared following **General Procedure IV** from peracetylated glucose (10 mmol, 3.9 g), thiourea (15 mmol, 1.1 g),  $\text{BF}_3 \cdot \text{Et}_2\text{O}$  (30 mmol, 3.75 mL),  $\text{Et}_3\text{N}$  (30 mmol, 4.3 mL), 3-bromo-2-methyl propene (15 mmol, 2 g) and *m*-CPBA (25 mmol, 4.3 g). **9** was isolated by flash chromatography (DCM:EtOAc = 10:1) as a white solid (2.82 g, 63%).  **$^1\text{H}$  NMR (400 MHz,  $\text{CDCl}_3$ )**  $\delta$  5.53 (dd,  $J$  = 9.6, 9.6 Hz, 1H), 5.31 (dd,  $J$  = 9.4, 9.4 Hz, 1H), 5.27 (br s, 1H), 5.20 (br s, 1H), 5.10 (dd,  $J$  = 9.8, 9.8 Hz, 1H), 4.58 (d,  $J$  = 9.9 Hz, 1H), 4.26 (dd,  $J$  = 12.6, 2.6 Hz, 1H), 4.21 (dd,  $J$  = 12.6, 5.1 Hz, 1H), 3.98 (d,  $J$  = 13.6 Hz, 1H), 3.80 (ddd,  $J$  = 10.1, 5.1, 2.7 Hz, 1H), 3.65 (d,  $J$  = 13.6 Hz, 1H), 2.09 (s, 3H), 2.05 (s, 3H), 2.04 (s, 3H), 2.03 (s, 3H), 1.98 (s, 3H).  **$^{13}\text{C}$  NMR (101 MHz,  $\text{CDCl}_3$ )**  $\delta$  170.48, 170.19, 169.32, 169.26, 133.00, 121.20, 85.82, 76.73, 73.30, 67.69, 66.29, 61.80, 57.65, 23.01, 20.79, 20.72, 20.66, 20.63. **M.P.:** 166-168 °C. **HRMS (DART-TOF)** calculated for  $\text{C}_{18}\text{H}_{26}\text{NaO}_{11}\text{S}^+$   $[\text{M}+\text{Na}]^+$   $m/z$  473.1088, found 473.1091.

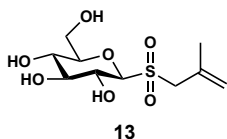

### 1-((2-Methylallyl)sulfonyl)- $\beta$ -D-glucopyranoside (**13**)

**13** was prepared following **General Procedure IV** from **9** (2 mmol, 900 mg) and LiOH (1 mmol, 24 mg). **13** was isolated by flash chromatography (DCM:MeOH = 10:1) as a white solid (472 mg, 84%).  **$^1\text{H}$  NMR (400 MHz,  $\text{CD}_3\text{OD}$ )**  $\delta$  5.20 (overlapping m, 2H), 4.43 (d,  $J$  = 9.6 Hz, 1H), 4.11 (d,  $J$  = 13.6 Hz, 1H), 3.87 (dd,  $J$  = 12.5, 2.1 Hz, 1H), 3.80 (d,  $J$  = 13.5 Hz, 1H), 3.77 (dd,  $J$  = 9.2, 9.2 Hz, 1H), 3.64 (dd,  $J$  = 12.5, 6.2 Hz, 1H), 3.42 (dd,  $J$  = 8.9, 8.9 Hz, 1H), 3.36 (ddd,  $J$  = 9.2, 6.2, 2.0 Hz, 1H), 3.27 (dd,  $J$  = 9.4, 9.4 Hz, 1H), 1.93 (s, 3H).  **$^{13}\text{C}$  NMR (101 MHz,  $\text{CD}_3\text{OD}$ )**  $\delta$  135.09, 121.86, 90.11, 83.33, 79.52, 71.15, 70.96, 63.12, 59.73, 23.83. **HRMS (DART-TOF)** calculated  $\text{C}_{10}\text{H}_{18}\text{NaO}_7\text{S}^+$   $[\text{M}+\text{Na}]^+$   $m/z$  305.0665, found 305.0674.

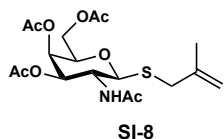

### 1-((2-Methylallyl)thio)-2-deoxy-2-N-acetyl-3,4,6-tri-O-acetyl- $\beta$ -D-galactopyranoside (SI-8)

**SI-8** was prepared following **General Procedure V** from peracetylated galactocose (3.33 mmol, 1.3 g),  $\text{TiCl}_4$  (5 mmol, 0.6 mL),  $\text{BF}_3 \cdot \text{Et}_2\text{O}$  (30 mmol, 3.8 mL), *t*BuOK (0.89 mmol, 100 mg), and 2-methylprop-2-ene-1-thiol (0.89 mmol, 93  $\mu\text{L}$ ). **SI-8** was isolated by flash chromatography (PE:EtOAc = 1:1) as a white solid (203 mg, 71%).  $^1\text{H}$  NMR (400 MHz,  $\text{CDCl}_3$ )  $\delta$  5.71 (d,  $J$  = 9.4 Hz, 1H), 5.38 (dd,  $J$  = 3.4, 1.1 Hz, 1H), 5.14 (dd,  $J$  = 10.8, 3.4 Hz, 1H), 4.88 (br s, 1H), 4.85 (br s, 1H), 4.55 (d,  $J$  = 10.4 Hz, 1H), 4.29 (td,  $J$  = 10.6, 9.3 Hz, 1H), 4.12 (dd,  $J$  = 11.3, 6.9 Hz, 1H), 4.08 (dd,  $J$  = 11.3, 6.1 Hz, 1H), 3.86 (td,  $J$  = 6.5, 0.7 Hz, 1H), 3.47 (d,  $J$  = 13.2 Hz, 1H), 3.12 (d,  $J$  = 13.2 Hz, 1H), 2.16 (s, 3H), 2.05 (s, 3H), 2.00 (s, 3H), 1.96 (s, 3H), 1.81 (s, 3H).  $^{13}\text{C}$  NMR (101 MHz,  $\text{CDCl}_3$ )  $\delta$  170.77, 170.51, 170.43, 170.34, 140.80, 114.22, 83.34, 74.54, 71.48, 67.19, 62.05, 49.51, 37.44, 23.39, 20.81, 20.78, 20.76, 20.71. HRMS (DART-TOF) calculated for  $\text{C}_{15}\text{H}_{27}\text{NaO}_8\text{S}^+$   $[\text{M}+\text{Na}]^+$   $m/z$  440.1350, found 440.1350.

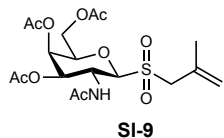

### 1-((2-Methylallyl)sulfonyl)-2-deoxy-2-N-acetyl-3,4,6-tri-O-acetyl- $\beta$ -D-galactopyranoside (SI-9)

**SI-9** was prepared following **General Procedure V** from **SI-8** (0.44 mmol, 180 mg) and *m*-CPBA (1.1 mmol, 220 mg). **SI-9** was isolated by flash chromatography (PE:EtOAc = 1:1) as a white solid (121 mg, 61%).  $^1\text{H}$  NMR (400 MHz,  $\text{CDCl}_3$ )  $\delta$  6.28 (d,  $J$  = 8.0 Hz, 1H), 5.72 (dd,  $J$  = 10.8, 3.3 Hz, 1H), 5.46 (d,  $J$  = 3.3 Hz, 1H), 5.25 (s, 1H), 5.21 (s, 1H), 5.17 (d,  $J$  = 10.1 Hz, 1H), 4.25 (td,  $J$  = 10.2, 8.3 Hz, 1H), 4.21 – 4.13 (m, 3H), 4.02 (d,  $J$  = 13.5 Hz, 1H), 3.73 (d,  $J$  = 13.5 Hz, 1H), 2.18 (s, 3H), 2.05 (s, 3H), 2.01 (s, 3H), 1.96 (s, 3H), 1.94 (s, 3H).  $^{13}\text{C}$  NMR (101 MHz,  $\text{CDCl}_3$ )  $\delta$  171.82, 170.37, 170.23, 170.14, 132.53, 121.28, 85.81, 75.53, 69.18, 67.11, 61.97, 57.32, 46.64, 23.43, 23.20, 20.78, 20.74. M.P.: 170–171  $^\circ\text{C}$ . HRMS (DART-TOF) calculated for  $\text{C}_{15}\text{H}_{27}\text{NNaO}_{10}\text{S}^+$   $[\text{M}+\text{Na}]^+$   $m/z$  472.1248, found 472.1242.

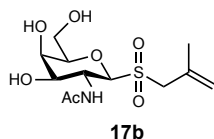

### 1-((2-Methylallyl)sulfonyl)-2-acetamido-2-deoxy-β-D-galactopyranoside (**17b**)

**17b** was prepared following **General Procedure V** from **SI-9** (0.5 mmol, 225 mg) and LiOH (0.25 mmol, 6 mg). **17b** was isolated by flash chromatography (DCM:MeOH = 10:1) as a white solid (159 mg, 97%).

**<sup>1</sup>H NMR (400 MHz, D<sub>2</sub>O)** δ 5.34 (t, *J* = 1.4 Hz, 1H), 5.22 (br s, 1H), 4.75 (d, *J* = 10.3 Hz, 1H), 4.46 (dd, *J* = 10.3, 10.3 Hz, 1H), 4.20 (d, *J* = 13.7 Hz, 1H), 4.05 (d, *J* = 3.2 Hz, 1H), 4.00 (d, *J* = 13.7 Hz, 1H), 3.86 – 3.76 (m, 4H), 2.01 (s, 3H), 1.93 (s, 3H). **<sup>13</sup>C NMR (101 MHz, D<sub>2</sub>O)** δ 174.54, 131.87, 121.67, 86.73, 80.12, 71.31, 67.71, 61.03, 56.81, 46.07, 22.20. **HRMS (DART-TOF)** calculated C<sub>12</sub>H<sub>21</sub>NNaO<sub>7</sub>S<sup>+</sup> [*M*+Na]<sup>+</sup> *m/z* 346.0931, found 346.0941.

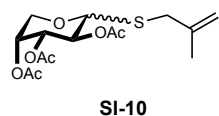

### 1-((2-Methylallyl)thio)-2,3,4-tri-*O*-acetyl-*D*-arabinopyran-oxide (**SI-10**)

**SI-10** was prepared following **General Procedure IV** from peracetylated arabinose (10 mmol, 3.2 g), thiourea (15 mmol, 1.14 g), BF<sub>3</sub>•Et<sub>2</sub>O (30 mmol, 3.8 mL), Et<sub>3</sub>N (30 mmol, 4.3 mL), and 3-bromo-2-methyl propene (15 mmol, 2 g). **SI-10** was isolated by flash chromatography (PE:EtOAc = 10:1) as a colorless oil (1.6 g, 45%, a 9:1 mixture of both isomers). Characterization data of the major isomer is provided. **<sup>1</sup>H NMR (400 MHz, CDCl<sub>3</sub>)** δ 5.28 (td, *J* = 3.7, 2.0 Hz, 1H), 5.23 (dd, *J* = 8.4, 8.4 Hz, 1H), 5.08 (dd, *J* = 8.6, 3.5 Hz, 1H), 4.90 (t, *J* = 1.6 Hz, 1H), 4.88 (s, 1H), 4.50 (d, *J* = 8.2 Hz, 1H), 4.10 (dd, *J* = 12.8, 3.8 Hz, 1H), 3.61 (dd, *J* = 12.8, 2.0 Hz, 1H), 3.42 (d, *J* = 12.9 Hz, 1H), 3.13 (d, *J* = 12.2 Hz, 1H), 2.13 (s, 3H), 2.07 (s, 3H), 2.04 (s, 3H), 1.81 (s, 3H). **<sup>13</sup>C NMR (101 MHz, CDCl<sub>3</sub>)** δ 170.38, 170.08, 169.62, 140.51, 114.67, 82.48, 70.75, 68.42, 67.93, 65.82, 37.85, 21.03, 20.90, 20.81, 20.69. **HRMS (DART-TOF)** calculated for C<sub>15</sub>H<sub>22</sub>NaO<sub>7</sub>S<sup>+</sup> [*M*+Na]<sup>+</sup> *m/z* 369.0978, found 369.0978.

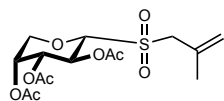

SI-11

### 1-((2-Methylallyl)sulfonyl)-2,3,4-tri-*O*-acetyl- $\alpha$ -*D*-arabinopyranoside (SI-11)

SI-11 was prepared following **General Procedure IV** from SI-10 (2 mmol, 620 mg) and *m*-CPBA (5 mmol, 860 mg). SI-11 was isolated by flash chromatography (PE:EtOAc = 10:1) as a white solid (467 mg, 62%). Only one isomer was isolated.

$^1\text{H}$  NMR (400 MHz,  $\text{CDCl}_3$ )  $\delta$  5.73 (dd,  $J = 9.4, 9.4$  Hz, 1H), 5.34 (ddd,  $J = 3.8, 2.8, 1.5$  Hz, 1H), 5.27 (br s, 1H), 5.17 – 5.12 (m, 2H), 4.47 (d,  $J = 9.3$  Hz, 1H), 4.24 (dd,  $J = 13.0, 2.7$  Hz, 1H), 3.92 (dd,  $J = 13.4, 0.8$  Hz, 1H), 3.79 (dd,  $J = 13.0, 1.6$  Hz, 1H), 3.75 (d,  $J = 13.4$  Hz, 1H), 2.17 (s, 3H), 2.08 (s, 3H), 2.04 (s, 3H), 1.98 (t,  $J = 1.2$  Hz, 3H).  $^{13}\text{C}$  NMR (101 MHz,  $\text{CDCl}_3$ )  $\delta$  170.28, 170.10, 169.49, 132.48, 121.48, 87.68, 70.66, 68.22, 67.57, 63.89, 57.34, 23.16, 21.03, 20.87, 20.72.

M.P.: 107–109 °C. HRMS (DART-TOF) calculated for  $\text{C}_{15}\text{H}_{22}\text{NaO}_9\text{S}^+$   $[\text{M}+\text{Na}]^+$   $m/z$  401.0877, found 401.0887.

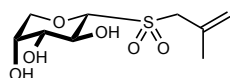

17c

### 1-((2-Methylallyl)sulfonyl)- $\alpha$ -*D*-arabinopyranoside (17c)

17c was prepared following **General Procedure IV** from SI-11 (0.5 mmol, 168 mg) and LiOH (0.25 mmol, 6 mg). 17c was isolated by flash chromatography (DCM:MeOH = 10:1) as a white solid (77 mg, 65%).  $^1\text{H}$  NMR (400 MHz,  $\text{D}_2\text{O}$ )  $\delta$  5.35 (t,  $J = 1.6$  Hz, 1H), 5.21 (s, 1H), 4.57 (d,  $J = 9.6$  Hz, 1H), 4.18 – 4.04 (m, 4H), 4.00 (d,  $J = 13.8$  Hz, 1H), 3.83 (d,  $J = 12.8$  Hz, 1H), 3.78 (dd,  $J = 9.4, 3.4$  Hz, 1H), 1.95 (s, 3H).  $^{13}\text{C}$  NMR (101 MHz,  $\text{D}_2\text{O}$ )  $\delta$  131.91, 121.65, 89.33, 72.91, 70.87, 68.12, 65.62, 57.95, 22.24. HRMS (DART-TOF) calculated  $\text{C}_9\text{H}_{16}\text{NaO}_6\text{S}^+$   $[\text{M}+\text{Na}]^+$   $m/z$  275.0560, found 275.0562.

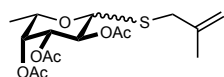

SI-12

### 1-((2-Methylallyl)thio)-2,3,4-tri-*O*-acetyl-*L*-fucopyranoside (SI-12)

SI-12 was prepared following **General Procedure IV** from peracetylated *L*-fucose (10 mmol, 3.3 g), thiourea (15 mmol, 1.14 g),  $\text{BF}_3 \cdot \text{Et}_2\text{O}$  (30 mmol, 3.8 mL),  $\text{Et}_3\text{N}$  (30 mmol, 4.3 mL) and 3-bromo-2-methyl propene (15 mmol, 2 g). SI-12 was isolated by flash chromatography (PE:EtOAc = 10:1) as a colorless oil (2.7 g, 81%, an 8:1 mixture of two isomers). Characterization data of the major isomer is

provided.  $^1\text{H}$  NMR (400 MHz,  $\text{CDCl}_3$ )  $\delta$  5.25 (dd,  $J = 3.2, 1.2$  Hz, 1H), 5.22 (dd,  $J = 9.9, 9.9$  Hz, 1H), 5.05 (dd,  $J = 9.9, 3.5$  Hz, 1H), 4.89 (m, 1H), 4.86 (br s, 1H), 4.42 (d,  $J = 10.0$  Hz, 1H), 3.76 (qd,  $J = 6.4, 1.2$  Hz, 1H), 3.44 (dd,  $J = 12.4, 0.9$  Hz, 1H), 3.15 (dd,  $J = 12.1, 1.2$  Hz, 1H), 2.17 (s, 3H), 2.05 (s, 3H), 1.99 (s, 3H), 1.81 (s, 3H), 1.21 (d,  $J = 6.4$  Hz, 3H).  $^{13}\text{C}$  NMR (101 MHz,  $\text{CDCl}_3$ )  $\delta$  170.71, 170.16, 169.67, 140.67, 114.35, 82.17, 73.13, 72.44, 70.56, 67.38, 37.49, 20.84, 20.75, 20.68, 20.63, 16.38. HRMS (DART-TOF) calculated for  $\text{C}_{16}\text{H}_{24}\text{NaO}_7\text{S}^+$   $[\text{M}+\text{Na}]^+$   $m/z$  383.1135, found 383.1137.

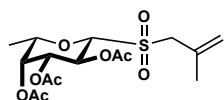

SI-13

### 1-((2-Methylallyl)sulfonyl)-2,3,4-tri-*O*-acetyl- $\beta$ -L-fucopyranoside (SI-13)

SI-13 was prepared following General Procedure IV from SI-12 (3.2 mmol, 1.06 g) and *m*-CPBA (8.1 mmol, 1.4 g). SI-13 was isolated by flash chromatography (PE:EtOAc = 5:1) as a white solid (840 mg, 67%).  $^1\text{H}$  NMR (400 MHz,  $\text{CDCl}_3$ )  $\delta$  5.68 (dd,  $J = 9.9, 9.9$  Hz, 1H), 5.31 (m, 1H), 5.27 (br s,  $J = 1.4$  Hz, 1H), 5.17 – 5.11 (m, 2H), 4.49 (d,  $J = 9.9$  Hz, 1H), 3.96 (qd,  $J = 6.5, 1.0$  Hz, 1H), 3.91 (dd,  $J = 13.3, 1.0$  Hz, 1H), 3.73 (d,  $J = 13.3$  Hz, 1H), 2.20 (s, 3H), 2.06 (s, 3H), 2.00 (s, 3H), 1.98 (s, 3H), 1.28 (dd,  $J = 6.6, 1.8$  Hz, 3H).  $^{13}\text{C}$  NMR (101 MHz,  $\text{CDCl}_3$ )  $\delta$  170.45, 170.02, 169.46, 132.51, 121.21, 87.56, 74.35, 71.77, 69.82, 63.53, 57.00, 23.05, 20.80, 20.69, 20.59, 16.33. M.P.: 144–146 °C. HRMS (DART-TOF) calculated for  $\text{C}_{16}\text{H}_{24}\text{NaO}_9\text{S}^+$   $[\text{M}+\text{Na}]^+$   $m/z$  415.1033, found 415.1039.

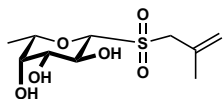

17d

### 1-((2-Methylallyl)sulfonyl)- $\beta$ -L-fucopyranoside (17d)

17d was prepared following General Procedure IV from SI-13 (0.2 mmol, 70 mg) and LiOH (0.1 mmol, 2.4 mg). 17d was isolated by flash chromatography (DCM:MeOH = 10:1) as a white solid (42 mg, 90%).  $^1\text{H}$  NMR (400 MHz,  $\text{D}_2\text{O}$ )  $\delta$  5.35 (br s, 1H), 5.20 (s, 1H), 4.60 (d,  $J = 9.6$  Hz, 1H), 4.15 (d,  $J = 13.8$  Hz, 1H), 4.09 (dd,  $J = 9.5, 9.5$  Hz, 1H), 3.97 (d,  $J = 13.8$  Hz, 1H), 3.94 (q,  $J = 6.5$  Hz, 1H), 3.85 (d,  $J = 3.3$  Hz, 1H), 3.76 (dd,  $J = 9.6, 3.4$  Hz, 1H), 1.95 (s, 3H), 1.32 (d,  $J = 6.5$  Hz, 3H).  $^{13}\text{C}$  NMR (101 MHz,  $\text{D}_2\text{O}$ )  $\delta$  132.06, 121.59, 88.87, 76.07, 73.71, 70.95, 65.39, 57.92, 22.26, 15.62. HRMS (DART-TOF) calculated for  $\text{C}_{10}\text{H}_{18}\text{NaO}_6\text{S}^+$   $[\text{M}+\text{Na}]^+$   $m/z$  289.0716, found 289.0732.

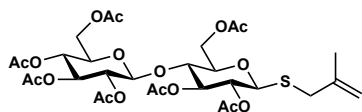

SI-14

**1-((2-Methylallyl)thio)-2,3,6-tri-*O*-acetyl-4-*O*-(2,3,4,6-tetra-*O*-acetyl- $\beta$ -D-glucopyranosyl)- $\beta$ -D-glucopyranoside (SI-14)**

SI-14 was prepared following **General Procedure IV** from peracetylated cellobiose (4.2 mmol, 2.8 g), thiourea (6.3 mmol, 482 mg),  $\text{BF}_3 \cdot \text{Et}_2\text{O}$  (12.7 mmol, 1.8 mL),  $\text{Et}_3\text{N}$  (12.7 mmol, 1.76 g) and 3-bromo-2-methyl propene (6.3 mmol, 851 mg). SI-14 was isolated by flash chromatography (PE:EtOAc = 2:1) as a yellow solid (1.8 g, 64%).  $^1\text{H}$  NMR (400 MHz,  $\text{CDCl}_3$ )  $\delta$  5.19 (dd,  $J$  = 9.2, 9.2 Hz, 1H), 5.13 (dd,  $J$  = 9.3, 9.3 Hz, 1H), 5.06 (dd,  $J$  = 9.6, 9.6 Hz, 1H), 4.95 (dd,  $J$  = 10.0, 10.0 Hz, 1H), 4.90 (dd,  $J$  = 9.3, 8.2 Hz, 1H), 4.98 (br s, 1H), 4.84 (s, 1H), 4.51 (d,  $J$  = 7.8 Hz, 1H), 4.51 (dd,  $J$  = 11.8, 1.5 Hz, 1H), 4.43 (d,  $J$  = 10.2 Hz, 1H), 4.36 (dd,  $J$  = 12.5, 4.4 Hz, 1H), 4.08 (dd,  $J$  = 12.0, 5.7 Hz, 1H), 4.02 (dd,  $J$  = 12.1, 1.0 Hz, 1H), 3.74 (dd,  $J$  = 9.5, 9.5 Hz, 1H), 3.66 (ddd,  $J$  = 9.8, 4.5, 2.3 Hz, 1H), 3.53 (ddd,  $J$  = 9.9, 5.7, 2.0 Hz, 1H), 3.41 (d,  $J$  = 13.3 Hz, 1H), 3.09 (d,  $J$  = 13.2 Hz, 1H), 2.12 (s, 3H), 2.08 (s, 3H), 2.03 (d,  $J$  = 1.6 Hz, 6H), 2.02 (s, 3H), 2.01 (s, 3H), 1.98 (s, 3H), 1.80 (s, 3H).  $^{13}\text{C}$  NMR (101 MHz,  $\text{CDCl}_3$ )  $\delta$  170.57, 170.36, 170.29, 169.88, 169.71, 169.40, 169.17, 140.45, 114.66, 100.95, 81.78, 76.75, 76.73, 73.77, 73.07, 72.09, 71.75, 70.27, 67.91, 62.36, 61.69, 37.75, 20.92, 20.78, 20.75, 20.64, 20.49. HRMS (DART-TOF) calculated for  $\text{C}_{30}\text{H}_{42}\text{NaO}_{17}\text{S}^+$   $[\text{M}+\text{Na}]^+$   $m/z$  729.2035, found 729.2038.

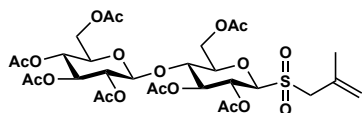

SI-15

**1-((2-Methylallyl)sulfonyl)-2,3,6-tri-*O*-acetyl-4-*O*-(2,3,4,6-tetra-*O*-acetyl- $\beta$ -D-glucopyranosyl)- $\beta$ -D-glucopyranoside (SI-15)**

SI-15 was prepared following **General Procedure IV** from SI-14 (2.7 mmol, 1.8 g) and *m*-CPBA (6.6 mmol, 1.15 g). SI-15 was isolated by flash chromatography (PE:EtOAc = 2:1) as a white solid (1.3 g, 65%).  $^1\text{H}$  NMR (400 MHz,  $\text{CDCl}_3$ )  $\delta$  5.49 (dd,  $J$  = 9.4, 9.4 Hz, 1H), 5.28 (dd,  $J$  = 9.0, 9.0 Hz, 1H), 5.25 (br s, 1H), 5.18 (s, 1H), 5.15 (dd,  $J$  = 9.4, 9.4 Hz, 1H), 5.06 (dd,  $J$  = 9.7, 9.7 Hz, 1H), 4.92 (dd,  $J$  = 9.4, 7.9 Hz, 1H), 4.62 (dd,  $J$  = 12.3, 1.9 Hz, 1H), 4.59 (d,  $J$  = 9.8 Hz, 1H), 4.56 (d,  $J$  = 7.9 Hz, 1H), 4.37 (dd,  $J$  = 12.5, 4.4 Hz, 1H), 4.08 (ddd,  $J$  = 14.7, 12.4, 3.9 Hz, 2H), 3.98 (d,  $J$  = 13.7 Hz, 1H), 3.81 (dd,  $J$  = 9.4, 9.4 Hz, 1H), 3.75 – 3.67 (m, 2H), 3.58 (d,  $J$  = 13.7 Hz, 1H), 2.12 (s, 3H), 2.09 (s, 3H), 2.04 (s, 3H), 2.03 (s, 6H), 2.01 (s, 3H), 1.98 (s, 3H), 1.97 (s, 3H).  $^{13}\text{C}$  NMR (101 MHz,  $\text{CDCl}_3$ )  $\delta$

170.54, 170.25, 170.19, 169.79, 169.37, 169.25, 169.10, 133.19, 120.98, 100.84, 84.87, 77.31, 75.71, 72.95, 72.87, 72.16, 71.70, 67.79, 66.01, 61.59, 61.54, 57.77, 29.37, 22.91, 20.81, 20.73, 20.64, 20.59, 20.53. **M.P.:** 87-89°C. **HRMS (DART-TOF)** calculated for  $C_{30}H_{42}NaO_{19}S^+$   $[M+Na]^+$   $m/z$  761.1933, found 761.1934.

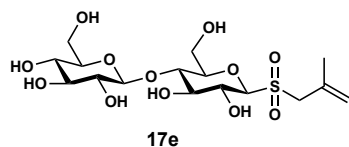

### 1-((2-Methylallyl)sulfonyl)-β-D-cellobioside (17e)

**17e** was prepared following **General Procedure IV** from **SI-15** (0.5 mmol, 369 mg) and LiOH (0.25 mmol, 6 mg). **17e** was isolated by flash chromatography (DCM:MeOH = 10:1) as a yellow solid (200 mg, 90%). **<sup>1</sup>H NMR (400 MHz, D<sub>2</sub>O)** δ 5.36 (br s, 1H), 5.23 (br s, 1H), 4.54 (d,  $J$  = 8.0 Hz, 1H), 4.20 (d,  $J$  = 14.0 Hz, 1H), 4.06 – 3.94 (m, 5H), 3.81 – 3.70 (m, 4H), 3.56 – 3.30 (m, 5H), 1.95 (s, 3H). **<sup>13</sup>C NMR (101 MHz, D<sub>2</sub>O)** δ 131.93, 121.74, 102.42, 87.63, 79.25, 77.02, 76.00, 75.45, 75.14, 73.10, 69.43, 68.32, 60.57, 59.67, 57.99, 22.17. **HRMS (DART-TOF)** calculated  $C_{16}H_{28}NaO_{12}S^+$   $[M+Na]^+$   $m/z$  467.1194, found 467.1191.

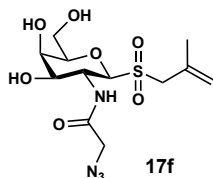

### 2-azido-N-((2S,3R,4R,5R,6R)-4,5-dihydroxy-6-(hydroxymethyl)-2-((2-methylallyl)sulfonyl)tetrahydro-2H-pyran-3-yl)acetamide (17f)

**17f** was prepared following **General Procedure V** and isolated by flash chromatography (DCM:MeOH = 10:1) as a white solid. **<sup>1</sup>H NMR (400 MHz, MeOD)** δ 5.22 (br s, 2H), 4.67 (d,  $J$  = 10.3 Hz, 1H), 4.44 (dd,  $J$  = 10.2, 10.2 Hz, 1H), 4.15 (d,  $J$  = 13.5 Hz, 1H), 3.95 (d,  $J$  = 2.8 Hz, 1H), 3.92 – 3.78 (m, 5H), 3.72 (dd,  $J$  = 11.9, 4.2 Hz, 1H), 3.67 (dd,  $J$  = 7.5, 4.3 Hz, 1H), 1.95 (s, 3H). **<sup>13</sup>C NMR (101 MHz, MeOD)** δ 171.42, 134.93, 121.87, 88.69, 82.59, 73.31, 70.16, 63.26, 58.05, 53.68, 24.60. **HRMS (DART-TOF)** calculated  $C_{12}H_{20}N_4NaO_7S^+$   $[M+Na]^+$   $m/z$  387.0945, found 387.0954.

## 6. Synthesis and Characterization Data of Disulfides in Fig. 2

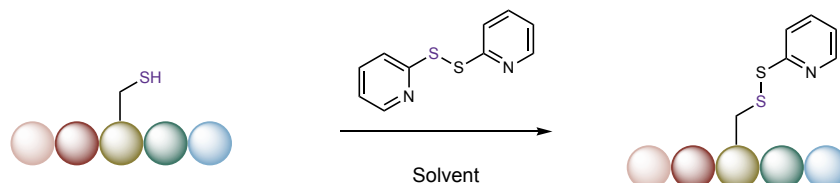

### General Procedure VI:

A cysteine containing peptide (0.17 mmol) was added to a 8.5 mL CH<sub>3</sub>OH solution of dipyridine disulfide (0.34 mmol, 75 mg). The reaction was incubated for 8 h until full consumption of the thiol. Addition of CH<sub>2</sub>Cl<sub>2</sub> to the reaction mixture caused precipitation of the peptide product, which is then filtered and air dried.

### General Procedure VII:

A cysteine containing peptide (0.17 mmol) was added to a 8.5 mL DMSO solution of dipyridine disulfide (0.34 mmol, 75 mg). The reaction was incubated for 8 h until full consumption of the thiol. Water (10 mL) was added to the reaction mixture. The resulting solution was subjected to reverse phase column for purification.

### Characterization Data for Disulfides in Fig. 3:

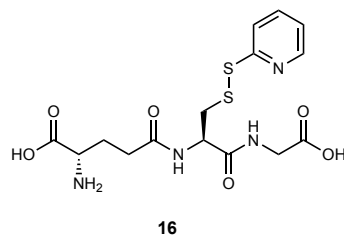

**Method 1:** **16** was prepared using the following procedure. Reduced glutathione (0.02 mmol, 6.1 mg) was added to a 1 mL stock solution (H<sub>2</sub>O:MeOH:TFA = 9:1:0.01) of dipyridine disulfide (0.04 mmol, 8.8 mg). The reaction was incubated for 0.5 h until full consumption of the thiol. The resulting solution was neutralized by adding 12 mg NaHCO<sub>3</sub> and was subjected to reverse phase flash column chromatography for purification to afford a white solid (8.3 mg, 98%).

**Method 2:** Reduced glutathione (2 mmol, 614 mg) was added to a 20 mL solution (MeOH:H<sub>2</sub>O = 1:1) of dipyridine disulfide (6 mmol, 1.32 g). The reaction was incubated for 8 h until full consumption of the thiol. **16** was subjected to reverse phase flash column chromatography for purification to afford a white solid (480 mg, 58%).

**<sup>1</sup>H NMR (400 MHz, D<sub>2</sub>O)** δ 8.46 (d, *J* = 5.1 Hz, 1H), 7.97 – 7.86 (m, 2H), 7.41 (t, *J* = 5.9 Hz, 1H), 4.64 (dd, *J* = 9.6, 4.3 Hz, 1H), 3.92 (s, 2H), 3.80 (t, *J* = 6.4 Hz, 1H), 3.40 (dd, *J* = 14.5, 4.3 Hz, 1H), 3.15 (dd, *J* = 14.5, 9.6 Hz, 1H), 2.46 – 2.32 (m, 2H), 2.19 – 2.05 (m, 2H). **<sup>13</sup>C NMR (101 MHz, D<sub>2</sub>O)** δ 174.59, 173.99, 173.65, 172.13, 157.78, 148.50, 139.48, 122.50, 122.34, 53.90, 52.71, 41.95, 39.38, 31.25, 26.04.

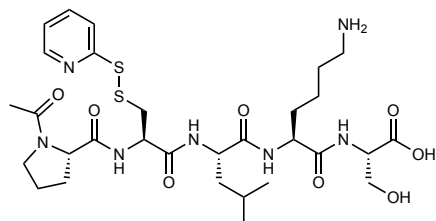

**14a**

**14a** was prepared following **General Procedure VII** from cysteine containing peptide (0.17 mmol, 100 mg) and dipyridine disulfide (0.34 mmol, 75 mg) in 8.5 mL DMSO. 10 mL water was added to the reaction mixture. The resulting solution was subjected to reverse phase flash column chromatography for purification to afford a white solid (66 mg, 55%).

**<sup>1</sup>H NMR (400 MHz, D<sub>2</sub>O)** δ 8.57 (d, *J* = 5.9 Hz, 1H), 8.18 (td, *J* = 8.0, 1.7 Hz, 1H), 8.08 (d, *J* = 8.3 Hz, 1H), 7.62 (dd, *J* = 7.6, 6.0 Hz, 1H), 4.67 (dd, *J* = 8.9, 5.4 Hz, 1H), 4.50 (t, *J* = 4.4 Hz, 1H), 4.43 – 4.35 (m, 3H), 3.97 (dd, *J* = 11.7, 4.8 Hz, 1H), 3.86 (dd, *J* = 11.7, 4.0 Hz, 1H), 3.72 – 3.61 (m, 2H), 3.37 (dd, *J* = 14.2, 5.5 Hz, 1H), 3.18 (dd, *J* = 14.3, 9.0 Hz, 1H), 2.99 (t, *J* = 7.6 Hz, 2H), 2.34 – 2.25 (m, 1H), 2.14 (s, 3H), 2.04 – 1.98 (m, 2H), 1.96 – 1.74 (m, 4H), 1.73 – 1.55 (m, 6H), 1.51 – 1.38 (m, 2H), 0.93 (d, *J* = 5.4 Hz, 3H), 0.87 (d, *J* = 5.3 Hz, 3H). **<sup>13</sup>C NMR (101 MHz, D<sub>2</sub>O)** δ 174.63, 174.19, 173.41, 173.29, 173.21, 171.31, 156.29, 145.40, 142.89, 124.07, 123.39, 117.76, 61.02, 60.19, 54.83, 53.26, 52.45, 52.29, 48.67, 39.63, 39.14, 39.04, 30.39, 29.89, 26.20, 24.30, 24.21, 22.09, 21.89, 21.42, 20.55. **HRMS (DART-TOF)** calculated for C<sub>30</sub>H<sub>48</sub>N<sub>7</sub>O<sub>8</sub>S<sub>2</sub><sup>+</sup> [M+H]<sup>+</sup> *m/z* 698.3000, found 601.2993.

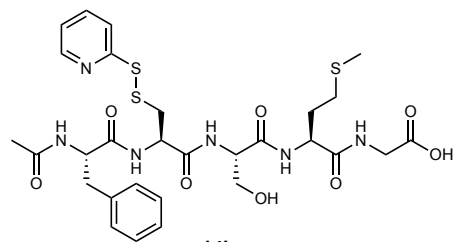

**14b**

**14b** was prepared following **General Procedure VI** from cysteine containing peptide (0.17 mmol, 100 mg) and dipyridine disulfide (0.34 mmol, 75 mg) in 8.5 mL CH<sub>3</sub>OH. **14b** was filtered and air dried as a white solid (112 mg, 95%).

**<sup>1</sup>H NMR (400 MHz, DMSO-*d*<sub>6</sub>)** δ 8.48 (dd, *J* = 13.6, 6.3 Hz, 2H), 8.24 – 8.15 (m, 2H), 8.09 (dd, *J* = 17.1, 7.7 Hz, 2H), 7.84 – 7.74 (m, 2H), 7.29 – 7.22 (m, 5H), 7.21 – 7.16 (m, 1H), 4.60 – 4.50 (m, 2H), 4.42 – 4.28 (m, 2H), 3.74 (ddd, *J* = 23.5, 17.8, 5.8 Hz, 2H), 3.60 (ddd, *J* = 29.4, 10.8, 5.8 Hz, 2H), 3.27 (dd, *J* = 13.5, 5.1 Hz, 1H), 3.09 – 3.00 (m, 2H), 2.75 (dd, *J* = 13.9, 10.2 Hz, 1H), 2.49 – 2.38 (m, 2H), 2.00 (s, 4H), 1.78 (s, 4H).

**<sup>13</sup>C NMR (101 MHz, DMSO-*d*<sub>6</sub>)** δ 171.74, 171.25, 170.98, 169.68, 169.47, 159.05, 149.56, 137.97, 137.89, 129.13, 128.05, 126.25, 121.15, 119.22, 61.55, 55.13, 54.06, 52.13, 51.79, 40.80, 40.69, 37.33, 31.82, 29.37, 22.48, 14.60.

**HRMS (DART-TOF)** calculated for C<sub>29</sub>H<sub>39</sub>N<sub>6</sub>O<sub>8</sub>S<sub>3</sub><sup>+</sup> [M+H]<sup>+</sup> *m/z* 695.1986, found 695.1994.

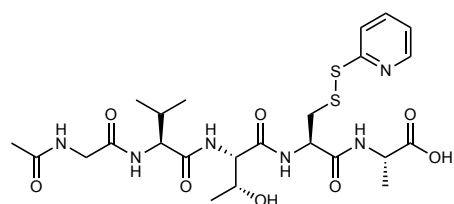

**14c**

**14c** was prepared following **General Procedure VI** from cysteine containing peptide (0.2 mmol, 100 mg) and dipyridine disulfide (0.4 mmol, 88 mg) in 8.5 mL CH<sub>3</sub>OH. **14c** was filtered and air dried as a white solid (102 mg, 84%).

**<sup>1</sup>H NMR (400 MHz, DMSO-*d*<sub>6</sub>)** δ 8.45 (d, *J* = 4.8 Hz, 1H), 8.26 (d, *J* = 7.2 Hz, 1H), 8.19 (d, *J* = 7.9 Hz, 1H), 8.14 – 8.07 (m, 1H), 7.87 (t, *J* = 8.1 Hz, 2H), 7.84 – 7.74 (m, 2H), 7.24 (t, *J* = 5.9 Hz, 1H), 5.07 (s, 1H), 4.58 – 4.50 (m, 1H), 4.30 – 4.24 (m, 2H), 4.15 (p, *J* = 6.8 Hz, 1H), 4.01 – 3.93 (m, 1H), 3.74 (d, *J* = 5.8 Hz, 2H), 3.22 (dd, *J* = 13.5, 4.8 Hz, 1H), 3.05 (dd, *J* = 13.4, 9.1 Hz, 1H), 2.05 – 1.95 (m, 1H), 1.85 (s, 3H), 1.25 (d, *J* = 7.0 Hz, 3H), 1.05 (d, *J* = 6.1 Hz, 3H), 0.83 (dd, *J* = 9.8, 4.9 Hz, 6H).

**<sup>13</sup>C NMR (101 MHz, DMSO-*d*<sub>6</sub>)** δ 173.63, 171.08, 169.82, 169.73, 169.20, 169.11, 159.05, 149.58, 137.94, 121.17, 119.16, 66.59, 58.21, 57.67, 51.87, 47.81, 42.05, 40.80, 30.55, 22.45, 19.44, 19.28, 18.02, 16.97.

**HRMS (DART-TOF)** calculated for C<sub>24</sub>H<sub>37</sub>N<sub>6</sub>O<sub>8</sub>S<sub>2</sub><sup>+</sup> [M+H]<sup>+</sup> *m/z* 601.2109, found 601.2104.

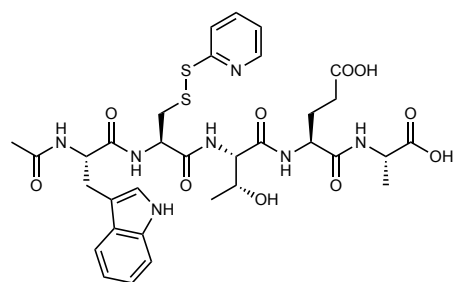

**14d**

**14d** was prepared following **General Procedure VI** from cysteine containing peptide (0.15 mmol, 100 mg) and dipyridine disulfide (0.3 mmol, 66 mg) in 8.5 mL CH<sub>3</sub>OH. **14d** was filtered and air dried as a white solid (100 mg, 86%).

**<sup>1</sup>H NMR (400 MHz, DMSO-*d*<sub>6</sub>)** δ 12.22 (s, 2H), 10.78 (s, 1H), 8.59 (d, *J* = 7.7 Hz, 1H), 8.47 (d, *J* = 4.9 Hz, 1H), 8.18 (d, *J* = 7.1 Hz, 1H), 8.13 (d, *J* = 7.9 Hz, 1H), 7.88 (dd, *J* = 8.2, 3.2 Hz, 2H), 7.81 – 7.75 (s, 2H), 7.62 (d, *J* = 7.8 Hz, 1H), 7.32 (d, *J* = 8.0 Hz, 1H), 7.24 (td, *J* = 5.7, 4.8, 2.1 Hz, 1H), 7.15 (d, *J* = 2.4 Hz, 1H), 7.06 (t, *J* = 7.5 Hz, 1H), 6.98 (t, *J* = 7.5 Hz, 1H), 4.99 (s, 1H), 4.63 – 4.54 (m, 2H), 4.36 – 4.28 (m, 1H), 4.24 (dd, *J* = 8.3, 4.0 Hz, 1H), 4.15 (t, *J* = 7.2 Hz, 1H), 4.01 (t, *J* = 4.6 Hz, 1H), 3.18 – 3.05 (m, 3H), 2.92 (dd, *J* = 14.8, 9.9 Hz, 1H), 2.27 (t, *J* = 8.2 Hz, 2H), 2.04 – 1.89 (m, 2H), 1.79 (s, 3H), 1.24 (d, *J* = 6.9 Hz, 3H), 1.04 (d, *J* = 6.3 Hz, 3H).

**<sup>13</sup>C NMR (101 MHz, DMSO-*d*<sub>6</sub>)** δ 174.09, 173.89, 172.27, 170.73, 169.73, 169.55, 169.41, 159.11, 149.58, 137.91, 136.09, 127.30, 123.63, 121.17, 120.89, 119.30, 118.49, 118.24, 111.32, 110.17, 66.56, 58.29, 53.52, 52.33, 51.51, 47.58, 40.55, 29.96, 27.70, 27.54, 22.56, 19.56, 16.91.

**HRMS (DART-TOF)** calculated for C<sub>33</sub>H<sub>42</sub>N<sub>7</sub>O<sub>10</sub>S<sub>2</sub><sup>+</sup> [M+H]<sup>+</sup> *m/z* 760.2429, found 760.2426.

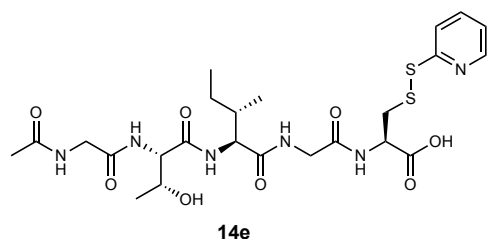

**14e** was prepared following **General Procedure VII** from cysteine containing peptide (0.2 mmol, 100 mg) and dipyridine disulfide (0.4 mmol, 88 mg) in 10 mL DMSO. 10 mL water was added to the reaction mixture. The resulting solution was subjected to reverse phase flash column chromatography for purification to afford a white solid (80 mg, 65%).

**<sup>1</sup>H NMR (400 MHz, DMSO-*d*<sub>6</sub>)** δ 8.45 (d, *J* = 4.2 Hz, 1H), 8.30 (d, *J* = 7.8 Hz, 1H), 8.19 (dt, *J* = 9.5, 5.8 Hz, 2H), 7.82 (td, *J* = 7.7, 1.9 Hz, 1H), 7.78 – 7.70 (m, 3H), 7.24 (dd, *J* = 7.2, 4.8 Hz, 1H), 4.94 (s, 1H), 4.50 – 4.43 (m, 1H), 4.29 (dd, *J* = 8.4, 4.1 Hz, 1H), 4.18 (t, *J* = 7.6 Hz, 1H), 4.03 – 3.96 (m, 1H), 3.82 – 3.70 (m, 4H), 3.23 (dd, *J* = 13.7, 4.7 Hz, 1H), 3.09 (dd, *J* = 13.7, 8.8 Hz, 1H), 1.85 (s, 3H), 1.79 – 1.71 (m, 1H), 1.52 – 1.43 (m, 1H), 1.15 – 1.05 (m, 1H), 1.01 (d, *J* = 6.3 Hz, 3H), 0.88 – 0.78 (m, 6H).

**<sup>13</sup>C NMR (101 MHz, DMSO-*d*<sub>6</sub>)** δ 171.62, 171.19, 170.04, 169.89, 169.32, 168.85, 158.80, 149.67, 137.97, 121.30, 119.33, 66.63, 57.91, 57.35, 51.50, 42.27, 41.67, 40.43, 36.59, 24.38, 22.47, 19.71, 15.36, 11.28.

**HRMS (DART-TOF)** calculated for C<sub>24</sub>H<sub>37</sub>N<sub>6</sub>O<sub>8</sub>S<sub>2</sub><sup>+</sup> [M+H]<sup>+</sup> *m/z* 601.2109, found 601.2189.

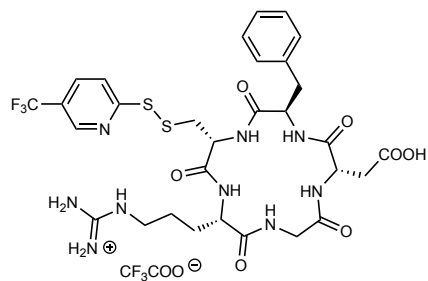

**14f**

The cysteine containing peptide (0.086 mmol, 57.9 mg) was added to a 8 mL CH<sub>3</sub>OH solution of 2,2'-bis(5-trifluoromethylpyridyl)disulfide (0.3 mmol, 106.8 mg). The reaction was incubated for 8h until full consumption of the thiol. CH<sub>3</sub>OH was evaporated under the reduced pressure. Addition of CH<sub>2</sub>Cl<sub>2</sub> to the reaction mixture caused precipitation of the peptide product, which is then filtered and air dried as a white solid (60.2 mg, 80%).

**<sup>1</sup>H NMR (400 MHz, DMSO-*d*<sub>6</sub>)** δ 8.86 (s, 1H), 8.40 – 8.30 (m, 2H), 8.21 (d, *J* = 7.3 Hz, 1H), 8.14 (dd, *J* = 8.6, 2.1 Hz, 1H), 8.09 – 7.86 (m, 3H), 7.59 – 7.50 (m, 1H), 7.28 – 7.11 (m, 6H), 4.67 – 4.59 (m, 1H), 4.49 – 4.36 (m, 2H), 4.17 – 4.01 (m, 2H), 3.25 (dd, *J* = 15.5, 3.6 Hz, 1H), 3.12 – 2.96 (m, 4H), 2.80 (dd, *J* = 13.6, 6.4 Hz, 1H), 2.68 (dd, *J* = 16.4, 8.2 Hz, 1H), 2.36 (dd, *J* = 16.2, 5.7 Hz, 1H), 1.82 – 1.68 (m, 1H), 1.56 – 1.32 (m, 3H). **<sup>13</sup>C NMR (101 MHz, DMSO-*d*<sub>6</sub>)** δ 172.08, 171.25, 171.05, 170.51, 170.17, 169.86, 164.72, 157.09, 146.95, 146.91, 137.73, 135.34, 129.50, 128.63, 126.76, 123.23, 122.91, 122.79, 120.00, 54.74, 54.07, 52.72, 49.40, 43.69, 40.81, 37.25, 35.78, 28.49, 25.64. **<sup>19</sup>F NMR (376 MHz, DMSO-*d*<sub>6</sub>)** δ -60.61, -73.95. **HRMS (DART-TOF)** calculated for C<sub>30</sub>H<sub>45</sub>N<sub>8</sub>O<sub>12</sub>S<sup>+</sup> [M-CF<sub>3</sub>COO]<sup>+</sup> *m/z* 756.2204, found 756.2206.

## 7. Synthesis and Characterization Data for Compounds in Fig. 2

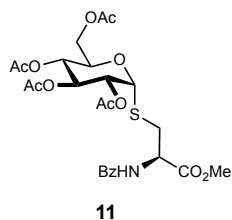

### Methyl N-(benzoyl)-S-(2,3,4,6-tetra-O-acetyl- $\alpha$ -D-glucopyranoside)-L-cysteinate

Product **11** was prepared following **General Procedure VIII** from **9** (0.2 mmol, 90 mg), **10b** (0.22 mmol, 70 mg) and Ir[dF(CF<sub>3</sub>)(ppy)<sub>2</sub>(dtbbpy)]PF<sub>6</sub> (0.001 mmol, 1.1 mg). **11** was isolated by flash chromatography (SiO<sub>2</sub>, PE:EtOAc = 3:1) as a

white solid (108 mg, 95%).

**<sup>1</sup>H NMR (400 MHz, CDCl<sub>3</sub>)**  $\delta$  7.82 (br d,  $J$  = 8.5 Hz, 2H), 7.49 (t,  $J$  = 7.4 Hz, 1H), 7.44 (d,  $J$  = 8.3 Hz, 1H), 7.40 (t,  $J$  = 7.4 Hz, 1H), 5.66 (d,  $J$  = 5.8 Hz, 1H), 5.24 (dd,  $J$  = 10.3, 9.5 Hz, 1H), 5.19 (ddd,  $J$  = 8.5, 5.0, 3.5 Hz, 1H), 4.99 (dd,  $J$  = 10.3, 9.2 Hz, 1H), 4.97 (dd,  $J$  = 10.4, 5.7 Hz, 1H), 4.37 (ddd,  $J$  = 10.3, 5.0, 2.1 Hz, 1H), 4.25 (dd,  $J$  = 12.6, 5.0 Hz, 1H), 4.15 (dd,  $J$  = 12.6, 2.2 Hz, 1H), 3.79 (s, 3H), 3.32 (dd,  $J$  = 14.5, 5.1 Hz, 1H), 3.13 (dd,  $J$  = 14.6, 3.5 Hz, 1H), 2.06 (s, 3H), 2.02 (s, 3H), 2.01 (s, 3H), 1.98 (s, 3H). **<sup>13</sup>C NMR (101 MHz, CDCl<sub>3</sub>)**  $\delta$  170.65, 170.42, 169.80, 169.78, 169.47, 167.01, 133.47, 131.95, 128.52, 127.27, 84.19, 70.49, 69.97, 68.65, 68.18, 61.77, 52.73, 52.70, 35.07, 20.66, 20.57, 20.52, 20.48. **HRMS (DART-TOF)** calculated C<sub>25</sub>H<sub>31</sub>NNaO<sub>12</sub>S<sup>+</sup> [M+Na]<sup>+</sup>  $m/z$  592.1459, found 592.1469.

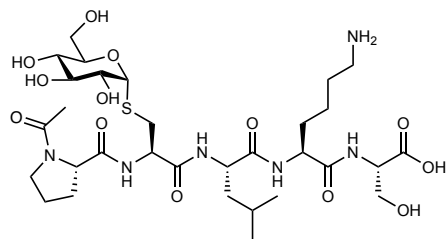

**15a**

**15a** was prepared following **General Procedure I** from the glycosyl donor **13** (0.022 mmol, 6.2 mg), disulfide **14a** (0.02 mmol, 13.9 mg), Eosin Y (65  $\mu$ L, 4 mg/mL in 0.05 mol/L aqueous solution of  $\text{Na}_2\text{CO}_3$ ), and 1 mL aqueous solution of  $\text{Na}_2\text{CO}_3$  (0.05 mmol/L). **15a** was obtained following reverse phase preparative HPLC for purification as a white solid (8.4 mg, 58%). **Reverse phase HPLC details:** Column type: Dubhe C18, 250 x10 mm, 10  $\mu$ m. Temperature = 25°C. Flow rate = 3 mL/min. Solvents used for the eluents are MeCN and water, both with 0.1% TFA. The eluent was kept constant at 5% MeCN for 15 min, then raised from 5% MeCN to 10% MeCN for 10 min, and from 10% MeCN to 90% MeCN for 80 min. The product was generally eluted from 36.2 min to 38.6 min.

**$^1\text{H}$  NMR (600 MHz,  $\text{D}_2\text{O}$ )**  $\delta$  5.48 (d,  $J$  = 5.5 Hz, 1H), 4.55 (dd,  $J$  = 8.7, 5.5 Hz, 1H), 4.48 (t,  $J$  = 4.2 Hz, 1H), 4.38–4.32 (m, 3H), 3.95 (dd,  $J$  = 11.8, 4.8 Hz, 1H), 3.94–3.91 (m, 1H), 3.83 (dd,  $J$  = 11.7, 3.9 Hz, 1H), 3.81–3.77 (m, 2H), 3.73 (dd,  $J$  = 12.5, 5.0 Hz, 1H), 3.67–3.56 (m, 2H), 3.50 (t,  $J$  = 9.6 Hz, 1H), 3.39 (t,  $J$  = 9.5 Hz, 1H), 3.06–2.94 (m, 4H), 2.30–2.20 (m, 1H), 2.08 (s, 3H), 1.98–1.95 (m, 3H), 1.92–1.80 (m, 2H), 1.78–1.70 (m, 1H), 1.69–1.51 (m, 6H), 1.48–1.37 (m, 2H), 0.89 (d,  $J$  = 5.8 Hz, 3H), 0.83 (d,  $J$  = 5.9 Hz, 3H).

**$^{13}\text{C}$  NMR (151 MHz,  $\text{D}_2\text{O}$ )**  $\delta$  174.62, 174.28, 173.50, 173.35, 173.30, 172.05, 86.98, 73.66, 72.58, 71.05, 69.56, 61.15, 60.47, 60.24, 54.91, 53.86, 53.32, 52.47, 48.76, 39.74, 39.29, 31.87, 30.45, 29.97, 26.26, 24.39, 24.30, 22.18, 21.97, 21.50, 20.72.

**HRMS (DART-TOF)** calculated for  $\text{C}_{31}\text{H}_{55}\text{N}_6\text{O}_{13}\text{S}^+$   $[\text{M}+\text{H}]^+$   $m/z$  751.3542, found 751.3538.

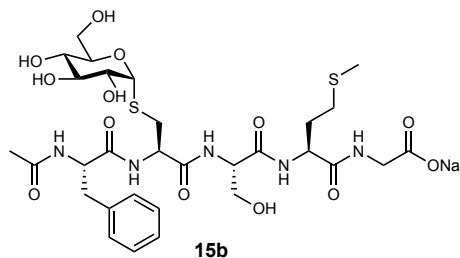

**15b** was prepared following **General Procedure I** from the glycosyl donor **13** (0.022 mmol, 6.2 mg), disulfide **14b** (0.02 mmol, 11.7 mg), Eosin Y (65  $\mu$ L, 4 mg/mL in 0.05 mol/L  $\text{Na}_2\text{CO}_3$  aqueous solution), and 1 mL aqueous solution of  $\text{Na}_2\text{CO}_3$  (0.05 mmol/L). **15b** was obtained following reverse phase preparative HPLC for purification as a white solid (8.0 mg, 52%). **Reverse phase HPLC details:** Column type: Dubhe C18, 250 x10 mm, 10  $\mu$ m. Temperature = 25°C. Flow rate = 3 mL/min. Solvents used for the eluents are MeCN and water, both with 0.1% TFA. The eluent was kept constant at 5% MeCN for 15 min, then raised from 5% MeCN to 10% MeCN for 10 min, and from 10% MeCN to 90% MeCN for 80 min. The product was generally eluted from 44.2 min to 45.2 min.

**$^1\text{H}$  NMR (600 MHz,  $\text{D}_2\text{O}$ )**  $\delta$  7.35 (dd,  $J$  = 7.0, 7.0 Hz, 2H), 7.30 (dd,  $J$  = 7.3, 7.3 Hz, 1H), 7.26 (d,  $J$  = 7.0 Hz, 2H), 5.45 (d,  $J$  = 5.5 Hz, 1H), 4.58 (dd,  $J$  = 8.2, 6.3 Hz, 2H), 4.54 (dd,  $J$  = 9.2, 5.0 Hz, 1H), 4.37 (t,  $J$  = 5.5 Hz, 1H), 3.99 (d,  $J$  = 18 Hz, 1H), 3.96 (d,  $J$  = 18 Hz, 1H), 3.90 (ddd,  $J$  = 10.0, 4.8, 2.4 Hz, 1H), 3.86 (dd,  $J$  = 14.6, 5.8 Hz, 1H), 3.83 (dd,  $J$  = 11.6, 5.6 Hz, 1H), 3.81 – 3.77 (m, 2H), 3.74 (dd,  $J$  = 12.5, 4.9 Hz, 1H), 3.51 (t,  $J$  = 9.5 Hz, 1H), 3.40 (t,  $J$  = 9.6 Hz, 1H), 3.09 (dd,  $J$  = 13.9, 6.8 Hz, 1H), 3.04 – 2.94 (m, 3H), 2.62 (ddd,  $J$  = 13.4, 8.1, 5.2 Hz, 1H), 2.53 (dt,  $J$  = 13.4, 7.8 Hz, 1H), 2.17 – 2.10 (m, 1H), 2.08 (s, 3H), 2.05 – 1.98 (m, 1H), 1.93 (s, 3H).  **$^{13}\text{C}$  NMR (151 MHz,  $\text{D}_2\text{O}$ )**  $\delta$  174.10, 173.64, 173.29, 173.19, 171.76, 171.63, 136.38, 129.20, 128.81, 127.22, 86.82, 73.63, 72.68, 71.02, 69.48, 60.93, 60.45, 55.76, 55.17, 53.68, 52.71, 41.34, 36.99, 32.11, 30.25, 29.34, 21.69, 14.19. **HRMS (DART-TOF)** calculated for  $\text{C}_{30}\text{H}_{44}\text{N}_5\text{Na}_2\text{O}_{13}\text{S}_2^+$   $[\text{M}+\text{Na}]^+$   $m/z$  792.2167, found 792.2167.

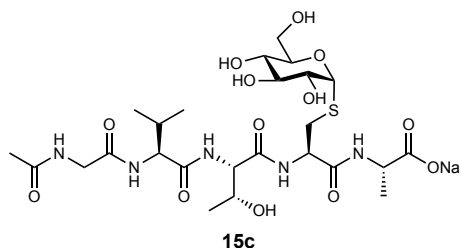

**15c** was prepared following **General Procedure I** from the glycosyl donor **13** (0.022 mmol, 6.1 mg), disulfide **14c** (0.02 mmol, 12 mg), Eosin Y (65  $\mu$ L, 4 mg/mL in 0.05 mol/L  $\text{Na}_2\text{CO}_3$  aqueous solution), and 1 mL aqueous solution of  $\text{Na}_2\text{CO}_3$  (0.05 mmol/L). **14c** was obtained following reverse

phase preparative HPLC for purification as a white solid (7.3 mg, 54%). **Reverse phase HPLC details:** Column type: Dubhe C18, 250 x10 mm, 10  $\mu$ m. Temperature = 25°C. Flow rate = 3 mL/min. Solvents used for the eluents are MeCN and water, both with 0.1% TFA. The eluent was kept constant at 5% MeCN for 15 min, then raised from 5% MeCN to 10% MeCN for 10 min, and from 10% MeCN to 90% MeCN for 80 min. The product was generally eluted from 32.2 min to 35.0 min.

**$^1\text{H}$  NMR (600 MHz,  $\text{D}_2\text{O}$ )**  $\delta$  5.50 (d,  $J$  = 5.5 Hz, 1H), 4.61 (dd,  $J$  = 8.7, 5.0 Hz, 1H), 4.41 – 4.35 (m, 2H), 4.24 (d,  $J$  = 7.3 Hz, 1H), 4.22 – 4.16 (m, 1H), 4.00 – 3.91 (m, 3H), 3.85 – 3.80 (m, 2H), 3.77 (dd,  $J$  = 12.5, 4.9 Hz, 1H), 3.54 (t,  $J$  = 9.5 Hz, 1H), 3.43 (t,  $J$  = 9.5 Hz, 1H), 3.10 (dd,  $J$  = 14.2, 5.0 Hz, 1H), 3.04 (dd,  $J$  = 14.3, 8.7 Hz, 1H), 2.15– 2.08 (m, 1H), 2.05 (s, 3H), 1.43 (d,  $J$  = 7.4 Hz, 3H), 1.21 (d,  $J$  = 6.4 Hz, 3H), 0.95 (dd,  $J$  = 8.6, 6.8 Hz, 6H).  **$^{13}\text{C}$  NMR (151 MHz,  $\text{D}_2\text{O}$ )**  $\delta$  176.04, 174.88, 173.83, 171.80, 171.46, 171.45, 87.15, 73.62, 72.59, 71.10, 69.53, 67.17, 60.48, 59.52, 59.04, 53.91, 48.81, 42.59, 32.36, 30.22, 21.76, 18.80, 18.57, 17.60, 16.22.

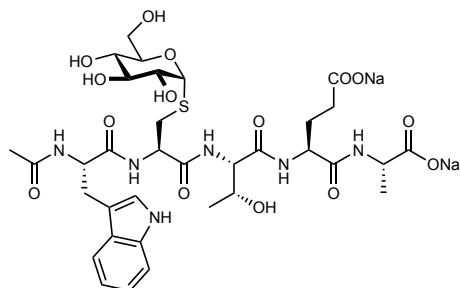

**15d** was prepared following **General Procedure I** from the glycosyl donor **13** (0.022 mmol, 6.2 mg), disulfide **14d** (0.02 mmol, 15.2 mg), Eosin Y (65  $\mu$ L, 4 mg/mL in 0.05 mol/L  $\text{Na}_2\text{CO}_3$  aqueous solution), and 1 mL aqueous solution of  $\text{Na}_2\text{CO}_3$  (0.05 mmol/L). **15d** was obtained following reverse phase preparative HPLC for purification as a white solid (8.5 mg, 51%). **Reverse phase HPLC details:** Column type: Dubhe C18, 250 x10 mm, 10  $\mu$ m. Temperature = 25°C. Flow rate = 3 mL/min. Solvents used for the eluents are MeCN and water, both with 0.1% TFA. The eluent was kept constant at 5% MeCN for 15 min, then raised from 5% MeCN to 10% MeCN for 10 min, and from 10% MeCN to 90% MeCN for 80 min. The product was generally eluted from 42.5 min to 44.4 min.

**$^1\text{H}$  NMR (600 MHz,  $\text{D}_2\text{O}$ )**  $\delta$  7.59 (d,  $J$  = 7.9 Hz, 1H), 7.45 (d,  $J$  = 8.1 Hz, 1H), 7.22 – 7.18 (m, 2H), 7.11 (t,  $J$  = 7.4 Hz, 1H), 5.34 (d,  $J$  = 5.5 Hz, 1H), 4.61 (t,  $J$  = 7.3 Hz, 1H), 4.51 (dd,  $J$  = 7.7, 5.8 Hz, 1H), 4.34 (dd,  $J$  = 8.7, 5.8 Hz, 1H), 4.28 (q,  $J$  = 7.3 Hz, 1H), 4.20 (d,  $J$  = 4.8 Hz, 1H), 4.14 – 4.09 (m, 1H), 3.80 (ddd,  $J$  = 9.9, 4.7, 2.4 Hz, 1H), 3.75 – 3.67 (m, 3H), 3.44 (t,  $J$  = 9.5 Hz, 1H), 3.36 (t,  $J$  = 9.5 Hz, 1H), 3.23 (dd,  $J$  = 14.6, 7.0 Hz, 1H), 3.16 (dd,  $J$  = 14.7, 7.4 Hz, 2H), 2.93 – 2.85 (m, 2H), 2.44 (t,  $J$  = 7.4 Hz, 2H), 2.12 – 2.05 (m, 1H), 1.98– 1.92 (m, 4H), 1.36 (d,  $J$  = 7.3 Hz, 3H), 1.14 (d,  $J$  = 6.3 Hz, 3H).  **$^{13}\text{C}$  NMR (151 MHz,  $\text{D}_2\text{O}$ )**  $\delta$  176.99, 174.01, 173.50, 172.51, 171.65, 171.34, 136.07, 126.77,

124.28, 121.87, 119.23, 118.19, 111.80, 108.71, 86.74, 73.43, 72.48, 70.85, 69.28, 66.81, 60.23, 59.13, 54.62, 53.56, 52.68, 48.78, 32.08, 29.69, 26.84, 26.03, 21.59, 18.64, 16.02. **HRMS (DART-TOF)** calculated for  $C_{34}H_{47}N_6Na_2O_{15}S^+$   $[M+H]^+$   $m/z$  857.2610, found 857.2632.

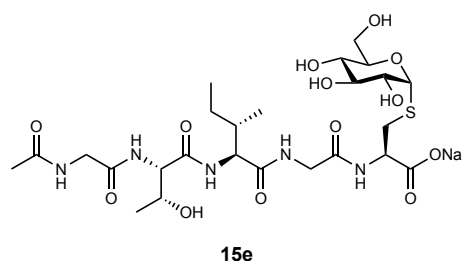

**15e** was prepared following **General Procedure I** from the glycosyl donor **13** (0.022 mmol, 6.2 mg), disulfide **14e** (0.02 mmol, 12 mg), Eosin Y (65  $\mu$ L, 4 mg/mL in 0.05 mol/L  $Na_2CO_3$  aqueous solution), and 1 mL aqueous solution of  $Na_2CO_3$  (0.05 mmol/L). **15e** was obtained following reverse phase preparative HPLC for purification as a white solid (7.6 mg, 56%). **Reverse phase preparative HPLC details:** Column type: Dubhe C18, 250 x10 mm, 10  $\mu$ m. Temperature = 25°C. Flow rate = 3 mL/min. Solvents used for the eluents are MeCN and water, both with 0.1% TFA. The eluent was kept constant at 5% MeCN for 15 min, then raised from 5% MeCN to 10% MeCN for 10 min, and from 10% MeCN to 90% MeCN for 80 min. The product was generally eluted from 25.3 min to 28.7 min.

**$^1H$  NMR (600 MHz,  $D_2O$ )**  $\delta$  5.45 (d,  $J$  = 5.5 Hz, 1H), 4.59 (dd,  $J$  = 7.9, 4.6 Hz, 1H), 4.40 (d,  $J$  = 5.0 Hz, 1H), 4.23 – 4.19 (m, 2H), 3.99 – 3.94 (m, 5H), 3.84 – 3.77 (m, 3H), 3.53 (t,  $J$  = 9.5 Hz, 1H), 3.43 (t,  $J$  = 9.5 Hz, 1H), 3.16 – 3.07 (m, 2H), 2.06 (s, 3H), 1.92 – 1.86 (m, 1H), 1.54 – 1.47 (m, 1H), 1.24 – 1.18 (m, 4H), 0.94 (d,  $J$  = 6.9 Hz, 3H), 0.87 (t,  $J$  = 7.4 Hz, 3H).  **$^{13}C$  NMR (151 MHz,  $D_2O$ )**  $\delta$  174.97, 173.83, 172.00, 171.96, 170.87, 87.20, 73.64, 72.53, 71.11, 69.57, 67.13, 60.45, 58.99, 58.64, 54.15, 42.65, 42.43, 36.10, 32.80, 24.67, 21.79, 18.90, 14.79, 10.18. **HRMS (DART-TOF)** calculated for  $C_{25}H_{43}N_5NaO_{13}S^+$   $[M+H]^+$   $m/z$  676.2470, found 676.2473.

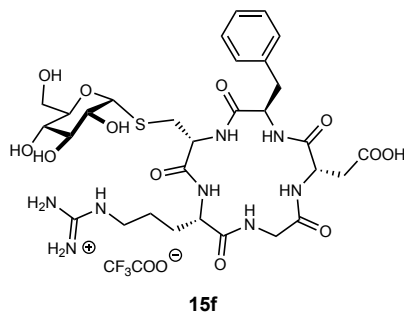

The glycosyl donor **13** (0.0165 mmol, 4.7 mg), disulfide **14f** (0.013 mmol, 11.3 mg), Ir[dF(CF<sub>3</sub>)(ppy)<sub>2</sub>(dtbbpy)]PF<sub>6</sub> (1.5 mol %, 0.2 mg), and 0.65 mL DMSO were added to a reaction vial under N<sub>2</sub>. The vial was irradiated with blue light for 2 h. The reaction mixture was directly subjected to the preparative RP-HPLC for purification to afford a white solid (4.0 mg, 36%). **Reverse phase HPLC details:** Column type: Dubhe C18, 250 x10 mm, 10 μm. Temperature = 25°C. Flow rate = 3 mL/min. Solvents used for the eluents are MeCN and water, both with 0.1% TFA. The eluent was kept constant at 5% MeCN for 15 min, then raised from 5% MeCN to 10% MeCN for 10 min, and from 10% MeCN to 90% MeCN for 80 min. The product was generally eluted from 36.3 min to 37.7 min. **<sup>1</sup>H NMR (800 MHz, D<sub>2</sub>O)** δ 7.40 (t, *J* = 7.6 Hz, 2H), 7.34 (t, *J* = 7.6 Hz, 1H), 7.28 (d, *J* = 7.6 Hz, 2H), 4.94 (d, *J* = 5.7 Hz, 1H), 4.72 (t, *J* = 7.3 Hz, 1H), 4.63 (t, *J* = 7.8 Hz, 1H), 4.46 (t, *J* = 6.2 Hz, 1H), 4.35 (dd, *J* = 16.8, 5.5 Hz, 1H), 4.22 (d, *J* = 15.1 Hz, 1H), 3.85 (d, *J* = 11.8 Hz, 1H), 3.82 – 3.75 (m, 3H), 3.50 (d, *J* = 15.1 Hz, 1H), 3.45 – 3.40 (m, 2H), 3.23 (dt, *J* = 14.0, 6.9 Hz, 1H), 3.17 (dt, *J* = 13.9, 7.1 Hz, 1H), 3.06 (dt, *J* = 13.4, 6.9 Hz, 2H), 3.00 (dd, *J* = 13.6, 9.3 Hz, 1H), 2.92 (dd, *J* = 16.9, 8.0 Hz, 1H), 2.73 (dd, *J* = 16.8, 6.6 Hz, 1H), 2.68 (dd, *J* = 14.8, 4.8 Hz, 1H), 1.93 – 1.87 (m, 1H), 1.71 – 1.65 (m, 1H), 1.65 – 1.60 (m, 1H), 1.59 – 1.53 (m, 1H). **<sup>13</sup>C NMR (201 MHz, D<sub>2</sub>O)** δ 174.21, 172.73, 172.57, 172.16, 171.39, 171.22, 163.20, 163.02, 162.85, 162.67, 156.62, 136.14, 129.20, 128.79, 127.18, 118.45, 117.00, 115.55, 114.10, 87.55, 73.53, 72.98, 70.65, 69.24, 60.38, 55.42, 54.92, 52.81, 49.71, 43.23, 40.51, 36.74, 34.11, 32.95, 27.11, 24.62. **<sup>19</sup>F NMR (376 MHz, D<sub>2</sub>O)** δ -75.62. **HRMS (DART-TOF)** calculated for C<sub>30</sub>H<sub>45</sub>N<sub>8</sub>O<sub>12</sub>S<sup>+</sup> [M-CF<sub>3</sub>COO]<sup>+</sup> *m/z* 741.2872, found 741.2876.

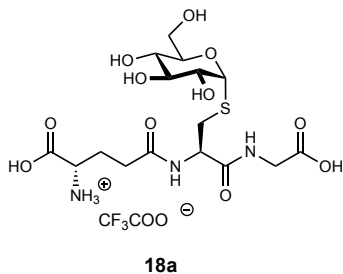

**18a** was prepared following **General Procedure II** from the glycosyl donor **13** (0.05 mmol, 14.1 mg), disulfide **16** (0.05 mmol, 20.8 mg), Eosin Y (5 mol%, 1.6 mg), and 1 mL aqueous NaHCO<sub>3</sub> solution

(0.1 M). **18a** was obtained following reverse phase preparative HPLC for purification as a white solid (16.6 mg, 57%). **Reverse phase HPLC details:** Column type: Dubhe C18, 250 x10 mm, 10  $\mu$ m. Temperature = 25°C. Flow rate = 3 mL/min. Solvents used for the eluents are MeCN and water, both with 0.1% TFA. The eluent was kept constant at 1% MeCN for 20 min. The product generally eluted from 6.9 min to 8.4 min.

**$^1\text{H}$  NMR (400 MHz,  $\text{D}_2\text{O}$ )**  $\delta$  5.50 (d,  $J$  = 5.5 Hz, 1H), 4.64 (dd,  $J$  = 8.3, 5.1 Hz, 1H), 4.04 – 3.94 (m, 4H), 3.87 – 3.77 (m, 3H), 3.55 (t,  $J$  = 9.4 Hz, 1H), 3.44 (t,  $J$  = 9.3 Hz, 1H), 3.16 – 3.04 (m, 2H), 2.64 – 2.54 (m, 2H), 2.27 – 2.19 (m, 2H).  **$^{13}\text{C}$  NMR (101 MHz,  $\text{D}_2\text{O}$ )**  $\delta$  174.42, 172.94, 172.69, 172.21, 87.10, 73.47, 72.53, 70.91, 69.36, 60.28, 53.92, 52.72, 41.12, 32.44, 30.99, 25.63.  **$^{19}\text{F}$  NMR (376 MHz,  $\text{D}_2\text{O}$ )**  $\delta$  -75.61. **HRMS (DART-TOF)** calculated for  $\text{C}_{16}\text{H}_{27}\text{N}_3\text{NaO}_{11}\text{S}^+$  [ $\text{M}-\text{CF}_3\text{COOH}+\text{Na}$ ] $^+$   $m/z$  492.1259, found 492.1259.

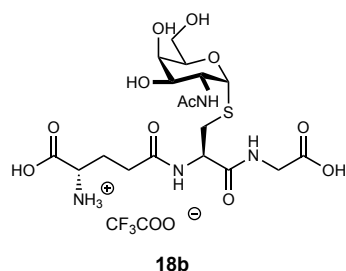

**18b** was prepared following **General Procedure II** from the glycosyl donor **17b** (0.022 mmol, 7.1 mg), disulfide **16** (0.02 mmol, 8.3 mg), Eosin Y (2 mol%, 0.3 mg), and 1 mL aqueous  $\text{NaHCO}_3$  solution (0.1 M). **18b** was obtained following reverse phase preparative HPLC for purification as a white solid (7.1 mg, 57%). **Reverse phase HPLC details:** Column type: Dubhe C18, 250 x10 mm, 10  $\mu$ m. Temperature = 25°C. Flow rate = 3 mL/min. Solvents used for the eluents are MeCN and water, both with 0.1% TFA. The eluent was kept constant at 1% MeCN for 20 min. The product generally eluted from 3.8 min to 4.9 min.

**$^1\text{H}$  NMR (400 MHz,  $\text{D}_2\text{O}$ )**  $\delta$  5.58 (d,  $J$  = 5.5 Hz, 1H), 4.66 (d,  $J$  = 7.1 Hz, 5.7Hz, 1H), 4.36 (dd,  $J$  = 11.4, 5.5 Hz, 1H), 4.27 (t,  $J$  = 6.1 Hz, 1H), 4.06 – 3.98 (m, 4H), 3.83 (dd,  $J$  = 11.4, 3.2 Hz, 1H), 3.79 (d,  $J$  = 6.2 Hz, 2H), 3.14 – 3.01 (m, 2H), 2.58 (td,  $J$  = 7.4, 3.5 Hz, 2H), 2.26 – 2.19 (m, 2H), 2.03 (s, 3H).  **$^{13}\text{C}$  NMR (101 MHz,  $\text{D}_2\text{O}$ )**  $\delta$  174.55, 174.31, 172.88, 172.49, 172.11, 114.85, 111.95, 84.97, 71.78, 68.36, 67.40, 61.10, 53.83, 52.63, 50.04, 41.07, 32.07, 30.95, 25.51, 21.87.  **$^{19}\text{F}$  NMR (376 MHz,  $\text{D}_2\text{O}$ )**  $\delta$  -75.61. **HRMS (DART-TOF)** calculated for  $\text{C}_{18}\text{H}_{30}\text{N}_4\text{NaO}_{11}\text{S}^+$  [ $\text{M}-\text{CF}_3\text{COOH}+\text{Na}$ ] $^+$   $m/z$  533.1524, found 533.1553.

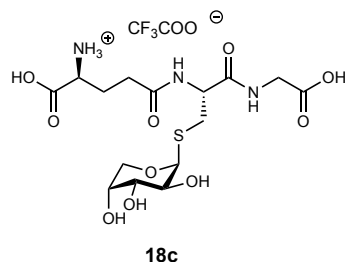

**18c** was prepared following **General Procedure II** from the glycosyl donor **17c** (0.011 mmol, 2.7 mg), disulfide **16** (0.01 mmol, 4.2 mg), Eosin Y (3 mol%, 0.2 mg), and 0.5 mL aqueous NaHCO<sub>3</sub> solution (0.1 M). **18c** was obtained following reverse phase preparative HPLC for purification as a white solid (3.6 mg, 65%). **Reverse phase HPLC details:** Column type: Dubhe C18, 250 x10 mm, 10  $\mu$ m. Temperature = 25°C. Flow rate = 3 mL/min. Solvents used for the eluents are MeCN and water, both with 0.1% TFA. The eluent was kept constant at 1% MeCN for 20 min. The product generally eluted from 5.1 min to 9.2 min.

**<sup>1</sup>H NMR (400 MHz, D<sub>2</sub>O)**  $\delta$  5.38 (d,  $J$  = 4.8 Hz, 1H), 4.64 (dd,  $J$  = 8.7, 5.2 Hz, 1H), 4.13 (dd,  $J$  = 12.6, 2.1 Hz, 1H), 4.09 (dd,  $J$  = 9.2, 4.7 Hz, 1H), 4.04 – 3.98 (m, 4H), 3.77 (dd,  $J$  = 9.1, 3.4 Hz, 1H), 3.69 (dd,  $J$  = 12.6, 3.7 Hz, 1H), 3.16 (dd,  $J$  = 14.1, 5.3 Hz, 1H), 2.91 (dd,  $J$  = 14.1, 8.8 Hz, 1H), 2.63 – 2.54 (m, 2H), 2.27 – 2.18 (m, 2H).

**<sup>13</sup>C NMR (101 MHz, D<sub>2</sub>O)**  $\delta$  174.45, 172.94, 172.60, 172.29, 163.15, 162.79, 117.76, 114.86, 85.53, 69.45, 68.52, 67.76, 63.80, 52.98, 52.76, 41.14, 31.31, 30.99, 25.62.

**<sup>19</sup>F NMR (376 MHz, D<sub>2</sub>O)**  $\delta$  -75.61.

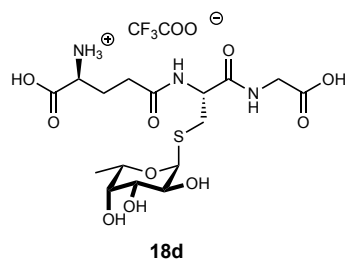

**18d** was prepared following **General Procedure II** from the glycosyl donor **17d** (0.022 mmol, 5.8 mg), disulfide **16** (0.02 mmol, 8.3 mg), Eosin Y (2.5 mol%, 0.3 mg), and 1 mL aqueous NaHCO<sub>3</sub> solution (0.1 M). **18d** was obtained following reverse phase preparative HPLC for purification as a white solid (6.9 mg, 61%). **Reverse phase HPLC details:** Column type: Dubhe C18, 250 x10 mm, 10  $\mu$ m. Temperature = 25°C. Flow rate = 3 mL/min. Solvents used for the eluents are MeCN and water, both with 0.1% TFA. The eluent was kept constant at 1% MeCN for 20 min. The product generally eluted from 5.2min to 6.6 min.

**<sup>1</sup>H NMR (400 MHz, D<sub>2</sub>O)** δ 5.44 (d, *J* = 5.7 Hz, 1H), 4.65 (dd, *J* = 8.6, 5.1 Hz, 1H), 4.32 (q, *J* = 6.6 Hz, 1H), 4.11–4.05 (m, 2H), 4.02 (s, 2H), 3.81 (d, *J* = 3.4 Hz, 1H), 3.74 (dd, *J* = 10.3, 3.4 Hz, 1H), 3.10 (dd, *J* = 14.0, 5.1 Hz, 1H), 2.89 (dd, *J* = 14.0, 8.6 Hz, 1H), 2.68 – 2.53 (m, *J* = 8.1 Hz, 2H), 2.32 – 2.18 (m, 2H), 1.24 (d, *J* = 6.5 Hz, 3H).

**<sup>13</sup>C NMR (101 MHz, D<sub>2</sub>O)** δ 174.77, 173.30, 172.64, 85.33, 71.66, 70.27, 67.64, 67.59, 53.64, 52.86, 41.44, 31.25, 30.95, 25.98, 15.42.

**<sup>19</sup>F NMR (376 MHz, D<sub>2</sub>O)** δ -75.61.

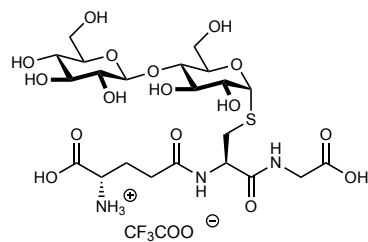

**18e**

**18e** was prepared following **General Procedure II** from the glycosyl donor **17e** (0.05 mmol, 22.2 mg), disulfide **16** (0.05 mmol, 20.8 mg), Eosin Y (5 mol%, 1.7 mg), and 1 mL aqueous NaHCO<sub>3</sub> solution (0.1 M). **18e** was obtained following reverse phase preparative HPLC for purification as a white solid (18.2 mg, 49%). **Reverse phase HPLC details:** Column type: Dubhe C18, 250 x10 mm, 10 μm. Temperature = 25°C. Flow rate = 3 mL/min. Solvents used for the eluents are MeCN and water, both with 0.1% TFA. The eluent was kept constant at 1% MeCN for 20 min. The product generally eluted from 4.3 min to 6.3 min.

**<sup>1</sup>H NMR (600 MHz, D<sub>2</sub>O)** δ 5.46 (d, *J* = 5.5 Hz, 1H), 4.58 (dd, *J* = 9.2, 4.5 Hz, 1H), 4.46 (d, *J* = 7.9 Hz, 1H), 4.05 – 4.03 (m, 1H), 3.90 – 3.80 (m, 5H), 3.75 – 3.72 (m, 2H), 3.69 (dd, *J* = 12.4, 5.8 Hz, 1H), 3.65 – 3.60 (m, 3H), 3.48 – 3.43 (m, 2H), 3.38 (t, *J* = 9.5 Hz, 1H), 3.28 (t, *J* = 8.6 Hz, 1H), 3.11 (dd, *J* = 14.5, 4.5 Hz, 1H), 3.03 (dd, *J* = 14.4, 9.2 Hz, 1H), 2.52 – 2.42 (m, 2H), 2.10 – 2.04 (m, 2H).

**<sup>13</sup>C NMR (151 MHz, D<sub>2</sub>O)** δ 176.30, 175.76, 175.30, 171.88, 163.35, 163.12, 162.88, 162.65, 119.37, 117.44, 115.51, 113.57, 102.69, 87.14, 78.78, 76.09, 75.65, 73.25, 72.18, 71.41, 70.87, 69.60, 60.74, 59.86, 54.55, 54.18, 43.52, 32.89, 31.81, 27.33.

**<sup>19</sup>F NMR (376 MHz, D<sub>2</sub>O)** δ -75.60.

**HRMS (DART-TOF)** calculated for C<sub>22</sub>H<sub>37</sub>N<sub>3</sub>NaO<sub>16</sub>S<sup>+</sup> [M-CF<sub>3</sub>COOH+Na]<sup>+</sup> *m/z* 654.1787, found 654.1791.

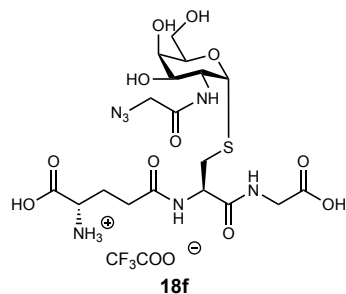

**18f** was prepared following **General Procedure III** from the Cys-containing peptide (0.02 mmol, 6.1 mg), the glycosyl donor **17f** (0.02 mmol, 7.6 mg), 2-methylisothiazolo[5,4-b]pyridin-3(2*H*)-one (0.02 mmol, 3.3 mg), Eosin Y (0.3 mg, 2 mol%), and 1 mL NaHCO<sub>3</sub> solution (0.1 M in water). **18f** was obtained following reverse phase preparative HPLC for purification as a white solid (4.5 mg, 34%). **Reverse phase HPLC details:** Column type: Dubhe C18, 250 x10 mm, 10 μm. Temperature = 25°C. Flow rate = 3 mL/min. Solvents used for the eluents are MeCN and water, both with 0.1% TFA. The eluent was kept constant at 1% MeCN for 20 min. The product generally eluted from 6.1 min to 6.5 min.

**<sup>1</sup>H NMR (800 MHz, Deuterium Oxide)** δ 5.60 (d, *J* = 5.7 Hz, 1H), 4.66 (t, *J* = 6.4 Hz, 1H), 4.41 (dd, *J* = 11.5, 5.5 Hz, 1H), 4.28 (t, *J* = 6.3 Hz, 1H), 4.09 – 4.00 (m, 6H), 3.87 (dd, *J* = 11.7, 3.0 Hz, 1H), 3.81 – 3.75 (m, 2H), 3.11 – 3.04 (m, 2H), 2.62 – 2.53 (m, 2H), 2.26 – 2.18 (m, *J* = 7.2 Hz, 2H).

**<sup>13</sup>C NMR (201 MHz, D<sub>2</sub>O)** δ 174.29, 172.86, 172.43, 172.08, 170.83, 163.05, 162.88, 117.01, 115.56, 84.76, 71.83, 68.36, 67.28, 61.08, 53.77, 52.61, 51.69, 50.16, 48.82, 41.06, 32.03, 30.94, 25.49.

**<sup>19</sup>F NMR (376 MHz, D<sub>2</sub>O)** δ -75.61.

## 8. Synthesis and Characterization Data for Products in Fig. 3

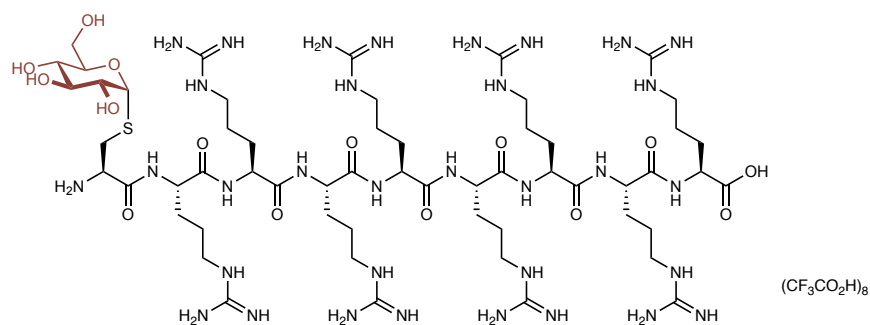

**23**

**23** was prepared following **General Procedure III** from the Cys-containing peptide (0.005 mmol, 11.4 mg), the glycosyl donor **13** (0.015 mmol, 4.2 mg), **20** (0.015 mmol, 2.9 mg), Eosin Y (25  $\mu$ L, 4 mg/mL in DMSO), and 1 mL H<sub>2</sub>O. **23** was obtained following reverse phase preparative HPLC for purification as a white solid (7.2 mg, 59%). **Reverse phase HPLC details:** Column type: Dubhe C18, 250 x10 mm, 10  $\mu$ m. Temperature = 25 °C. Flow rate = 3 mL/min. Solvents used for the eluents are MeCN and water, both with 0.1% TFA. The eluent was kept constant at 5% MeCN for 15 min, then raised from 5% MeCN to 10% MeCN for 10 min, and from 10% MeCN to 90% MeCN for 80 min. The product was generally eluted from 27.9 min to 31.9 min.

**<sup>1</sup>H NMR (800 MHz, D<sub>2</sub>O)**  $\delta$  5.47 (d,  $J$  = 5.5 Hz, 1H), 4.40 (t,  $J$  = 7.2 Hz, 1H), 4.34 – 4.32 (m, 7H), 4.22 (t,  $J$  = 6.5 Hz, 1H), 3.97 (t,  $J$  = 8.3 Hz, 1H), 3.93 – 3.90 (m, 1H), 3.87 (dd,  $J$  = 10.1, 5.5 Hz, 1H), 3.77 (dd,  $J$  = 12.5, 6.4 Hz, 1H), 3.53 (t,  $J$  = 9.6 Hz, 1H), 3.41 (t,  $J$  = 9.6 Hz, 1H), 3.25 (dd,  $J$  = 14.9, 6.1 Hz, 1H), 3.22 – 3.18 (m, 16H), 3.16 (dd,  $J$  = 15.0, 5.7 Hz, 1H), 1.87 – 1.74 (m, 16H), 1.68 – 1.61 (m, 16H). **<sup>13</sup>C NMR (201 MHz, D<sub>2</sub>O)**  $\delta$  177.01, 173.23, 173.22, 173.20, 173.18, 172.80, 172.78, 167.98, 163.19, 163.02, 162.84, 162.66, 156.69, 156.68, 118.49, 117.04, 115.59, 114.14, 86.16, 73.46, 72.98, 70.78, 69.52, 60.56, 54.04, 53.45, 53.40, 53.30, 53.19, 53.16, 53.11, 52.40, 40.55, 40.50, 31.26, 28.34, 28.27, 28.25, 28.22, 28.12, 24.49, 24.42, 24.40, 24.37, 24.31, 24.27. **<sup>19</sup>F NMR (376 MHz, D<sub>2</sub>O)**  $\delta$  -75.57.



## HPLC Trace:

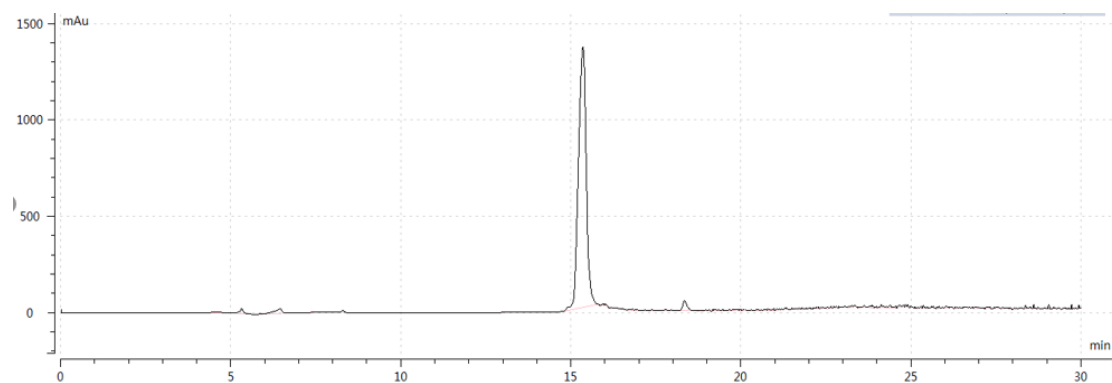

## Theoretical Mass: YEKPLQNFTLC(Glu)FR-NH<sub>2</sub>

| Ion Series | Neutral Losses | Precursor Ions  | Internal Fragments                     |
|------------|----------------|-----------------|----------------------------------------|
| #1         | b <sup>+</sup> | b <sup>2+</sup> | Seq. y <sup>+</sup> y <sup>2+</sup> #2 |
| 1          | 164.07061      | 82.53894        | Y 13                                   |
| 2          | 293.11320      | 147.06024       | E 12                                   |
| 3          | 421.20816      | 211.10772       | K 11                                   |
| 4          | 518.26092      | 259.63410       | P 10                                   |
| 5          | 631.34499      | 316.17613       | L 9                                    |
| 6          | 759.40357      | 380.20542       | Q 8                                    |
| 7          | 873.44649      | 437.22689       | N 7                                    |
| 8          | 1020.51491     | 510.76109       | F 6                                    |
| 9          | 1121.56259     | 561.28493       | T 5                                    |
| 10         | 1234.64665     | 617.82696       | L 4                                    |
| 11         | 1499.70863     | 750.35796       | C-21-B 3                               |
| 12         | 1646.77705     | 823.89216       | F 2                                    |
| 13         |                |                 | R-R-13 1                               |

## Observed Mass:

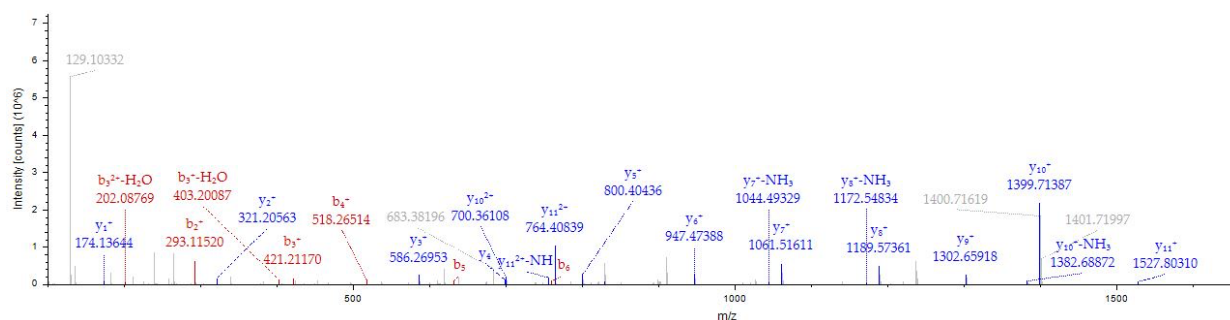

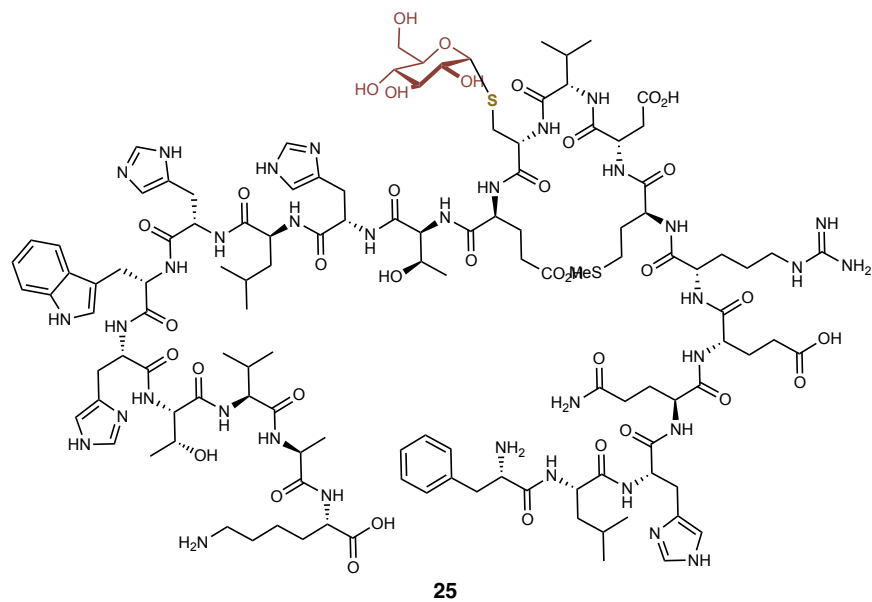

**25** was prepared following **General Procedure III** from the Cys-containing peptide (0.0038 mmol, 10.0 mg), glycosyl donor **13** (0.015 mmol, 4.3 mg), **20** (0.015 mmol, 3.0 mg), Eosin Y (38  $\mu$ L, 4 mg/mL DMSO), and 760  $\mu$ L H<sub>2</sub>O. **25** was obtained following reverse phase preparative HPLC for purification as a white solid (6.6 mg, 62%). **Reverse phase HPLC details:** Column type: Dubhe C18, 250 x10 mm, 10  $\mu$ m. Temperature = 25 °C. Flow rate = 3 mL/min. Solvents used for the eluents are MeCN and water, both with 0.1% TFA. The eluent was kept constant at 5% MeCN for 15 min, then raised from 5% MeCN to 10% MeCN for 10 min, and from 10% MeCN to 90% MeCN for 80 min. The product was generally eluted from 43.1 min to 45.2 min.

**<sup>1</sup>H NMR: 400 MHz, D<sub>2</sub>O**

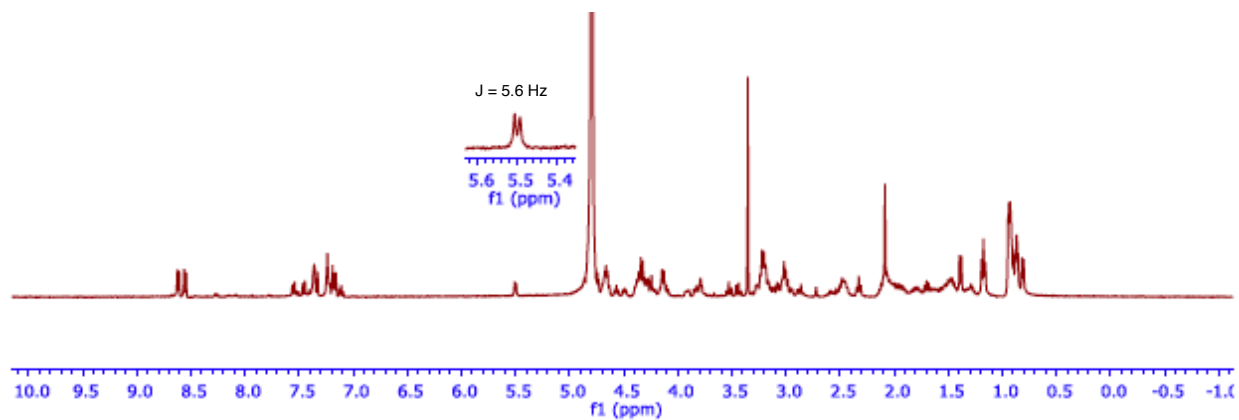

## HPLC Trace:

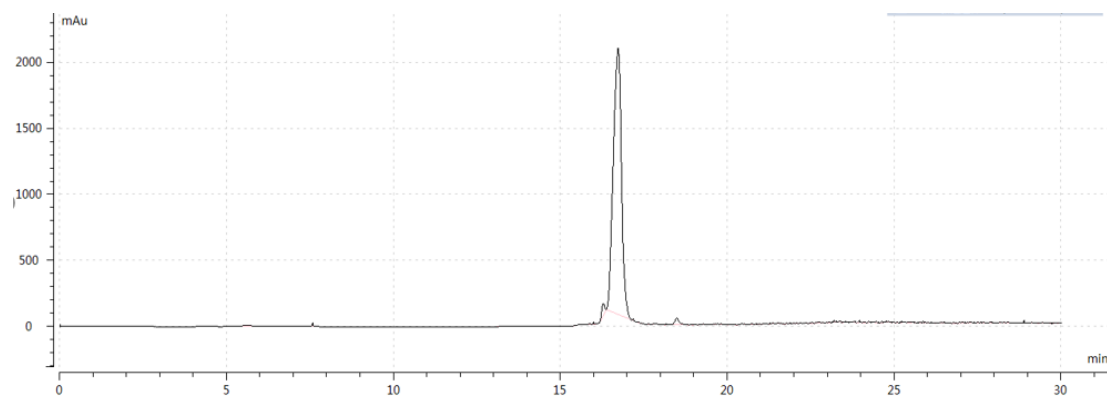

## Theoretical Mass: FLHQERMDVC(Glu)ETHLHWHTVAK

| Ion Series | Neutral Losses | Precursor Ions  | Internal Fragments |        |                |                 |                 |    |
|------------|----------------|-----------------|--------------------|--------|----------------|-----------------|-----------------|----|
| #1         | b <sup>+</sup> | b <sup>2+</sup> | b <sup>3+</sup>    | Seq.   | y <sup>+</sup> | y <sup>2+</sup> | y <sup>3+</sup> | #2 |
| 1          | 148.07569      | 74.54148        | 50.03008           | F      |                |                 |                 | 21 |
| 2          | 261.15975      | 131.08352       | 87.72477           | L      | 2632.23948     | 1316.62338      | 878.08468       | 20 |
| 3          | 398.21867      | 199.61297       | 133.41107          | H      | 2519.15541     | 1260.08134      | 840.38999       | 19 |
| 4          | 526.27724      | 263.64226       | 176.09727          | Q      | 2382.09650     | 1191.55189      | 794.70368       | 18 |
| 5          | 655.31984      | 328.16356       | 219.11146          | E      | 2254.03792     | 1127.52260      | 752.01749       | 17 |
| 6          | 811.42095      | 406.21411       | 271.14517          | R      | 2124.99533     | 1063.00130      | 709.00329       | 16 |
| 7          | 942.46143      | 471.73435       | 314.82533          | M      | 1968.89422     | 984.95075       | 656.96959       | 15 |
| 8          | 1057.48838     | 529.24783       | 353.16764          | D      | 1837.85374     | 919.43051       | 613.28943       | 14 |
| 9          | 1156.55679     | 578.78203       | 386.19045          | V      | 1722.82679     | 861.91703       | 574.94712       | 13 |
| 10         | 1421.61877     | 711.31303       | 474.54444          | C-21-B | 1623.75838     | 812.38283       | 541.92431       | 12 |
| 11         | 1550.66137     | 775.83432       | 517.55864          | E      | 1358.69639     | 679.85184       | 453.57032       | 11 |
| 12         | 1651.70904     | 826.35816       | 551.24120          | T      | 1229.65380     | 615.33054       | 410.55612       | 10 |
| 13         | 1788.76796     | 894.88762       | 596.92750          | H      | 1128.60612     | 564.80670       | 376.87356       | 9  |
| 14         | 1901.85202     | 951.42965       | 634.62219          | L      | 991.54721      | 496.27724       | 331.18725       | 8  |
| 15         | 2038.91093     | 1019.95910      | 680.30850          | H      | 878.46315      | 439.73521       | 293.49257       | 7  |
| 16         | 2224.99025     | 1112.99876      | 742.33493          | W      | 741.40423      | 371.20576       | 247.80626       | 6  |
| 17         | 2362.04916     | 1181.52822      | 788.02124          | H      | 555.32492      | 278.16610       | 185.77983       | 5  |
| 18         | 2463.09684     | 1232.05206      | 821.70380          | T      | 418.26601      | 209.63664       | 140.09352       | 4  |
| 19         | 2562.16525     | 1281.58626      | 854.72660          | V      | 317.21833      | 159.11280       | 106.41096       | 3  |
| 20         | 2633.20236     | 1317.10482      | 878.40564          | A      | 218.14992      | 109.57860       | 73.38816        | 2  |
| 21         |                |                 |                    | K      | 147.11280      | 74.06004        | 49.70912        | 1  |

## Observed Mass

FTMS, 927.4435@hcd27.00, z=+3, Mono m/z=927.11029 Da, MH+=2779.31632 Da, Match Tol.=0.02 Da

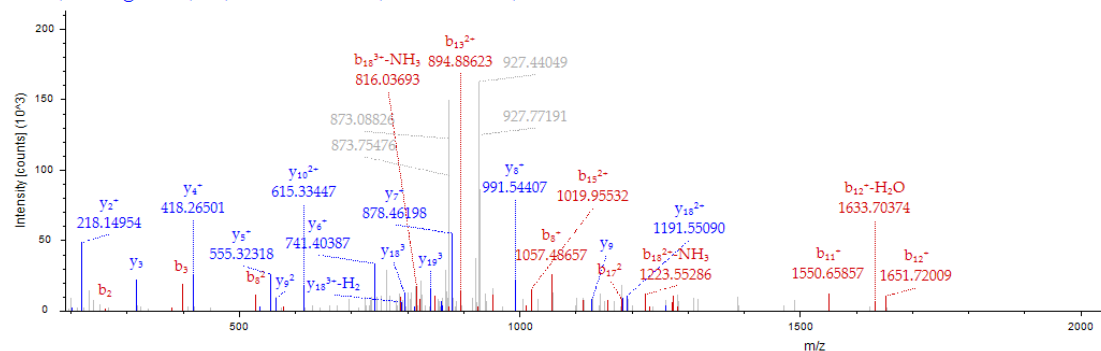

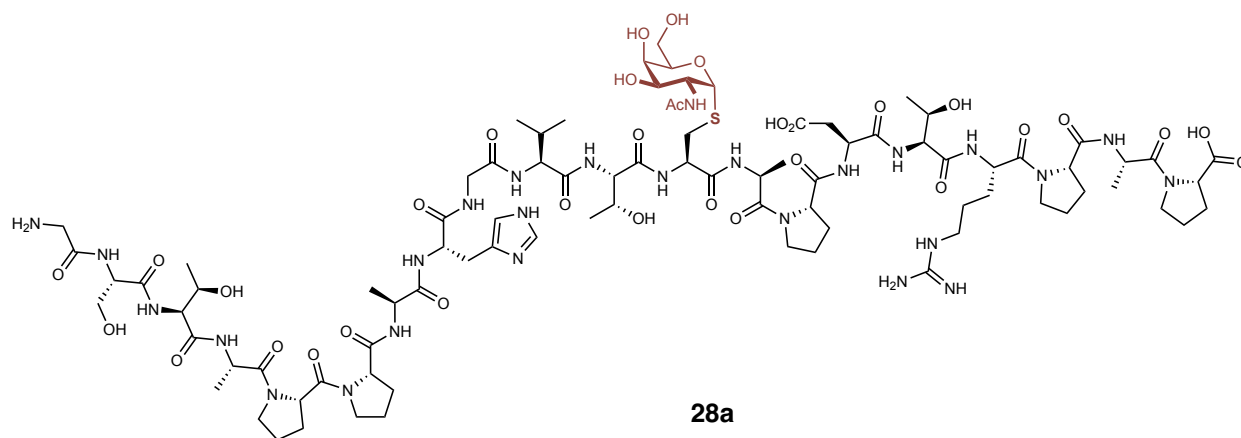

**28a** was prepared following **General Procedure III** from the Cys-containing peptide (0.005 mmol, 9.5 mg), glycosyl donor **17b** (0.02 mmol, 6.5 mg), **20** (0.02 mmol, 3.9 mg), Eosin Y (48  $\mu$ L, 4 mg/mL in DMSO), and 1 mL H<sub>2</sub>O. **28a** was obtained following reverse phase preparative HPLC for purification as a white solid (5.6 mg, 53%). **Reverse phase HPLC details:** Column type: Dubhe C18, 250 x10 mm, 10  $\mu$ m. Temperature = 25°C. Flow rate = 3 mL/min. Solvents used for the eluents are MeCN and water, both with 0.1% TFA. The eluent was kept constant at 5% MeCN for 15 min, then raised from 5% MeCN to 10% MeCN for 10 min, and from 10% MeCN to 90% MeCN for 80 min. The product was generally eluted from 37.0 min to 38.2 min.

**<sup>1</sup>H NMR: 400 MHz, D<sub>2</sub>O**

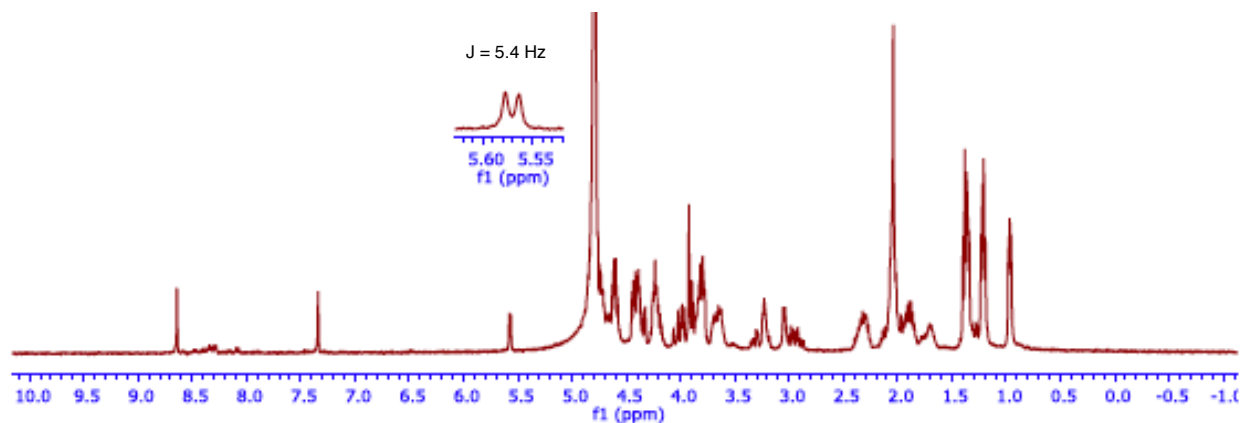

HPLC Trace:

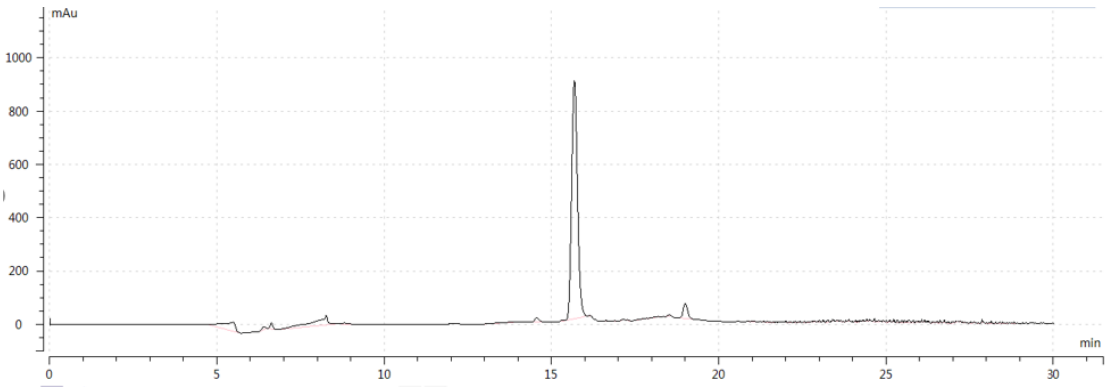

Theoretical Mass: GSTAPPAHGVT**C**(Gal**Nac**)APDTRPAP

| Ion Series | Neutral Losses | Precursor Ions  | Internal Fragments                     |
|------------|----------------|-----------------|----------------------------------------|
| #1         | b <sup>+</sup> | b <sup>2+</sup> | Seq. y <sup>+</sup> y <sup>2+</sup> #2 |
| 1          | 58.02874       | 29.51801        | G 20                                   |
| 2          | 145.06077      | 73.03402        | S 19                                   |
| 3          | 246.10845      | 123.55786       | T 18                                   |
| 4          | 317.14556      | 159.07642       | A 17                                   |
| 5          | 414.19832      | 207.60280       | P 16                                   |
| 6          | 511.25109      | 256.12918       | P 15                                   |
| 7          | 582.28820      | 291.64774       | A 14                                   |
| 8          | 719.34711      | 360.17720       | H 13                                   |
| 9          | 776.36858      | 388.68793       | G 12                                   |
| 10         | 875.43699      | 438.22213       | V 11                                   |
| 11         | 976.48467      | 488.74597       | T 10                                   |
| 12         | 1282.57325     | 641.79027       | C-20-3 9                               |
| 13         | 1353.61037     | 677.30882       | A 8                                    |
| 14         | 1450.66313     | 725.83520       | P 7                                    |
| 15         | 1565.69007     | 783.34868       | D 6                                    |
| 16         | 1666.73775     | 833.87251       | T 5                                    |
| 17         | 1822.83886     | 911.92307       | R 4                                    |
| 18         | 1919.89163     | 960.44945       | P 3                                    |
| 19         | 1990.92874     | 995.96801       | A 2                                    |
| 20         |                |                 | P 1                                    |

Observed Mass

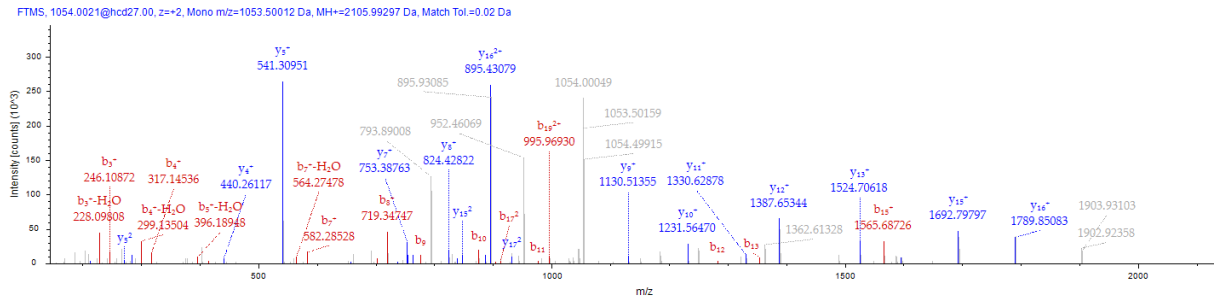

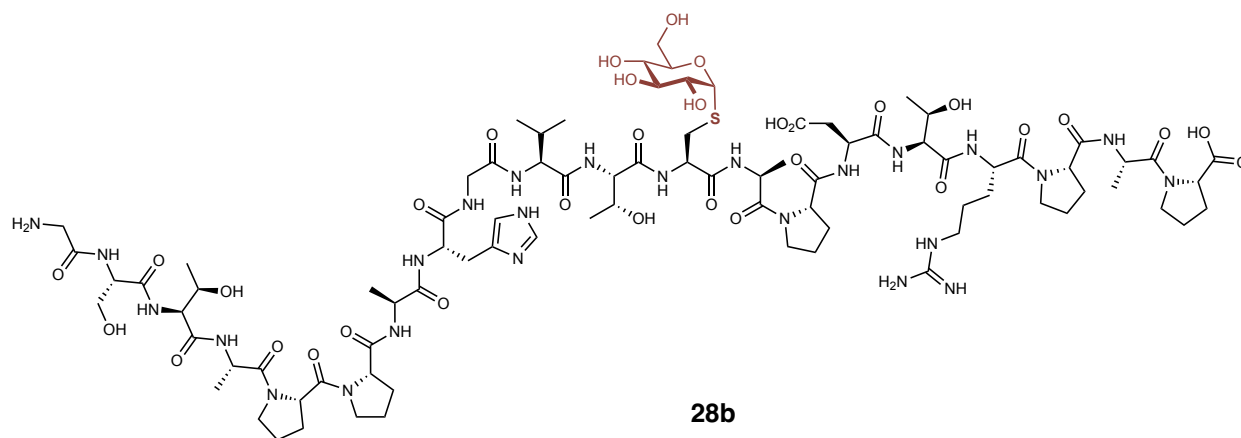

**28b** was prepared following **General Procedure III** from the Cys-containing peptide (0.005 mmol, 9.5 mg), glycosyl donor **13** (0.02 mmol, 5.6 mg), **20** (0.02 mmol, 3.9 mg), Eosin Y (48  $\mu$ L, 4 mg/mL in DMSO), and 1 mL H<sub>2</sub>O. **28b** was obtained following reverse phase preparative HPLC for purification as a white solid (6.8 mg, 66%). **Reverse phase HPLC details:** Column type: Dubhe C18, 250 x10 mm, 10  $\mu$ m. Temperature = 25 °C. Flow rate = 3 mL/min. Solvents used for the eluents are MeCN and water, both with 0.1% TFA. The eluent was kept constant at 5% MeCN for 15 min, then raised from 5% MeCN to 10% MeCN for 10 min, and from 10% MeCN to 90% MeCN for 80 min. The product was generally eluted from 36.0 min to 37.2 min.

**<sup>1</sup>H NMR: 400 MHz, D<sub>2</sub>O**

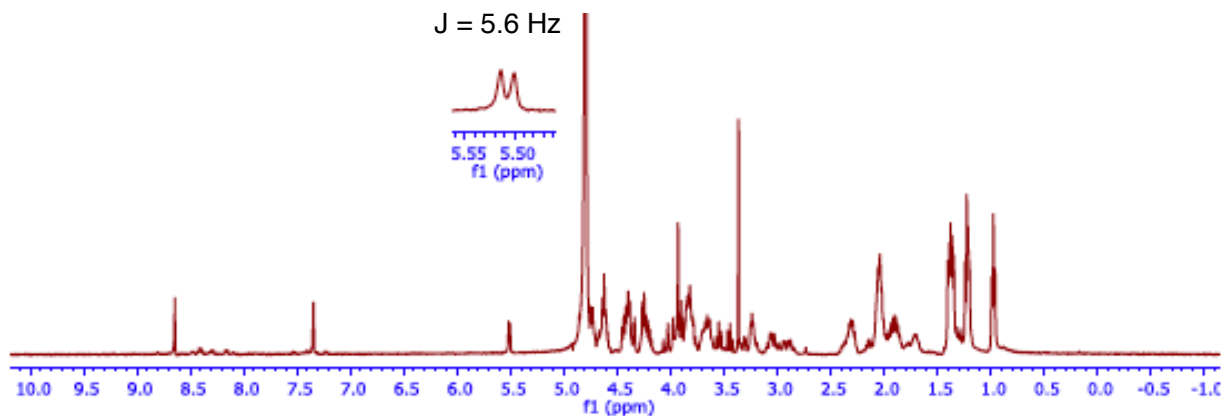

## HPLC Trace:

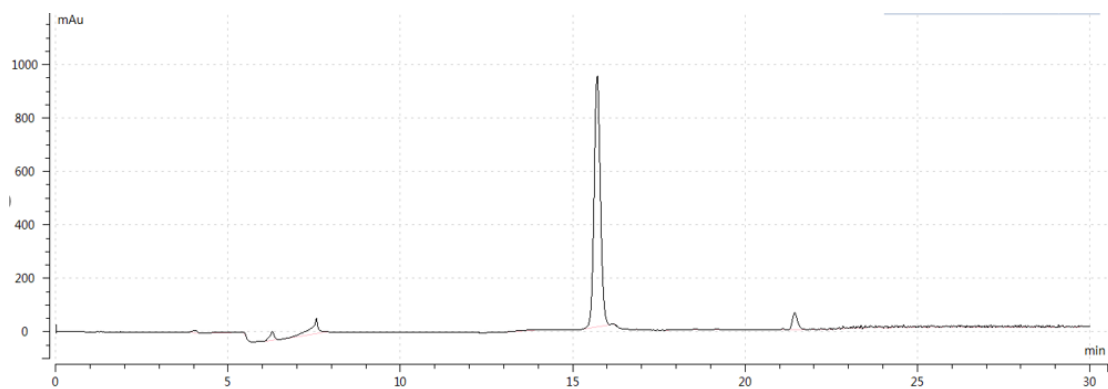

## Theoretical Mass: GSTAPPAHGVT**C(Glu)**APDTRPAP

| Ion Series | Neutral Losses | Precursor Ions  | Internal Fragments |        |                |                 |                 |    |
|------------|----------------|-----------------|--------------------|--------|----------------|-----------------|-----------------|----|
| #1         | b <sup>+</sup> | b <sup>2+</sup> | b <sup>3+</sup>    | Seq.   | y <sup>+</sup> | y <sup>2+</sup> | y <sup>3+</sup> | #2 |
| 1          | 58.02874       | 29.51801        | 20.01443           | G      |                |                 |                 | 20 |
| 2          | 145.06077      | 73.03402        | 49.02511           | S      | 2007.95181     | 1004.47954      | 669.98879       | 19 |
| 3          | 246.10845      | 123.55786       | 82.70767           | T      | 1920.91978     | 960.96353       | 640.97811       | 18 |
| 4          | 317.14556      | 159.07642       | 106.38670          | A      | 1819.87210     | 910.43969       | 607.29555       | 17 |
| 5          | 414.19832      | 207.60280       | 138.73763          | P      | 1748.83499     | 874.92113       | 583.61651       | 16 |
| 6          | 511.25109      | 256.12918       | 171.08855          | P      | 1651.78222     | 826.39475       | 551.26559       | 15 |
| 7          | 582.28820      | 291.64774       | 194.76759          | A      | 1554.72946     | 777.86837       | 518.91467       | 14 |
| 8          | 719.34711      | 360.17720       | 240.45389          | H      | 1483.69234     | 742.34981       | 495.23563       | 13 |
| 9          | 776.36858      | 388.68793       | 259.46104          | G      | 1346.63343     | 673.82035       | 449.54933       | 12 |
| 10         | 875.43699      | 438.22213       | 292.48385          | V      | 1289.61197     | 645.30962       | 430.54217       | 11 |
| 11         | 976.48467      | 488.74597       | 326.16641          | T      | 1190.54356     | 595.77542       | 397.51937       | 10 |
| 12         | 1241.55445     | 621.28087       | 414.52300          | C-20-2 | 1089.49588     | 545.25158       | 363.83681       | 9  |
| 13         | 1312.59157     | 656.79942       | 438.20204          | A      | 824.42609      | 412.71668       | 275.48022       | 8  |
| 14         | 1409.64433     | 705.32580       | 470.55296          | P      | 753.38898      | 377.19813       | 251.80118       | 7  |
| 15         | 1524.67127     | 762.83928       | 508.89528          | D      | 656.33621      | 328.67175       | 219.45026       | 6  |
| 16         | 1625.71895     | 813.36311       | 542.57784          | T      | 541.30927      | 271.15827       | 181.10794       | 5  |
| 17         | 1781.82006     | 891.41367       | 594.61154          | R      | 440.26159      | 220.63444       | 147.42538       | 4  |
| 18         | 1878.87283     | 939.94005       | 626.96246          | P      | 284.16048      | 142.58388       | 95.39168        | 3  |
| 19         | 1949.90994     | 975.45861       | 650.64150          | A      | 187.10772      | 94.05750        | 63.04076        | 2  |
| 20         |                |                 |                    | P      | 116.07061      | 58.53894        | 39.36172        | 1  |

## Observed Mass

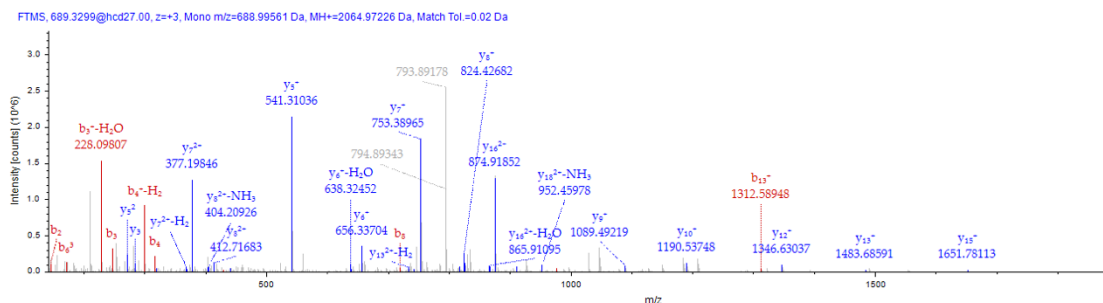

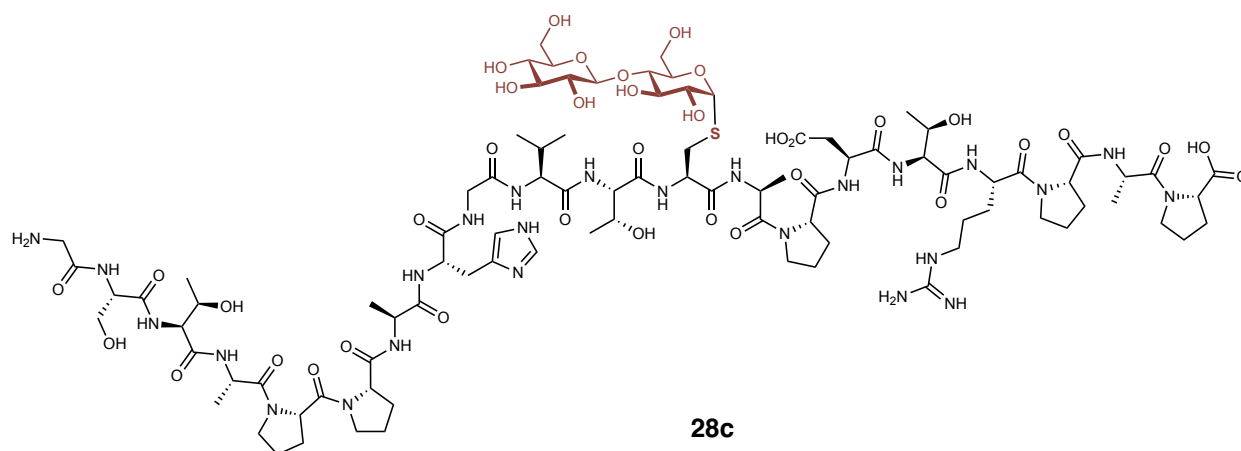

**28c** was prepared following **General Procedure III** from the Cys-containing peptide (0.005 mmol, 9.5 mg), glycosyl donor **17e** (0.02 mmol, 8.9 mg), **20** (0.02 mmol, 3.9 mg), Eosin Y (48  $\mu$ L, 4 mg/mL in DMSO), and 1 mL H<sub>2</sub>O. **28c** was obtained following reverse phase preparative HPLC for purification as a white solid (6.1 mg, 55%). **Reverse phase HPLC details:** Column type: Dubhe C18, 250 x10 mm, 10  $\mu$ m. Temperature = 25 °C. Flow rate = 3 mL/min. Solvents used for the eluents are MeCN and water, both with 0.1% TFA. The eluent was kept constant at 5% MeCN for 15 min, then raised from 5% MeCN to 10% MeCN for 10 min, and from 10% MeCN to 90% MeCN for 80 min. The product was generally eluted **from** 38.2 min to 40.0 min.

**<sup>1</sup>H NMR: 400 MHz, D<sub>2</sub>O**

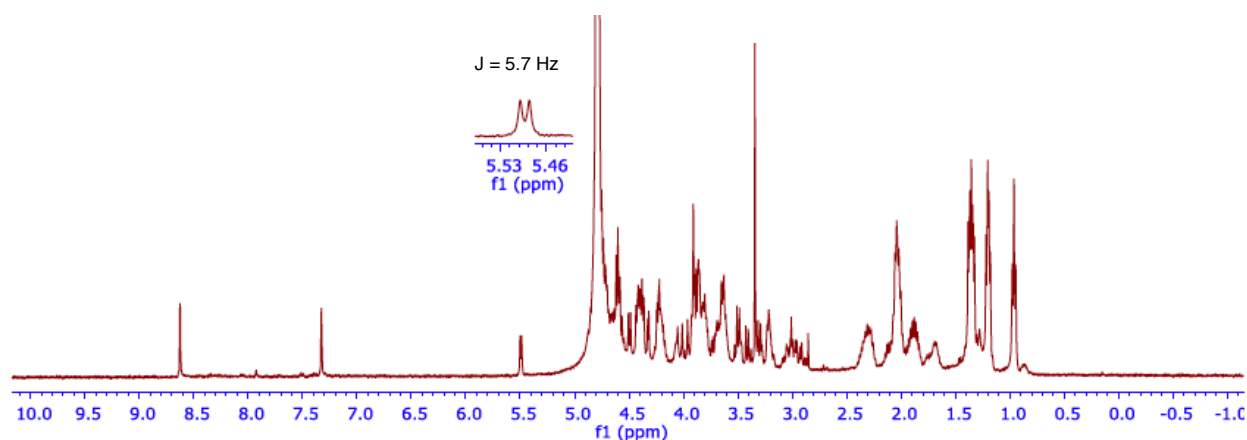

## HPLC Trace:

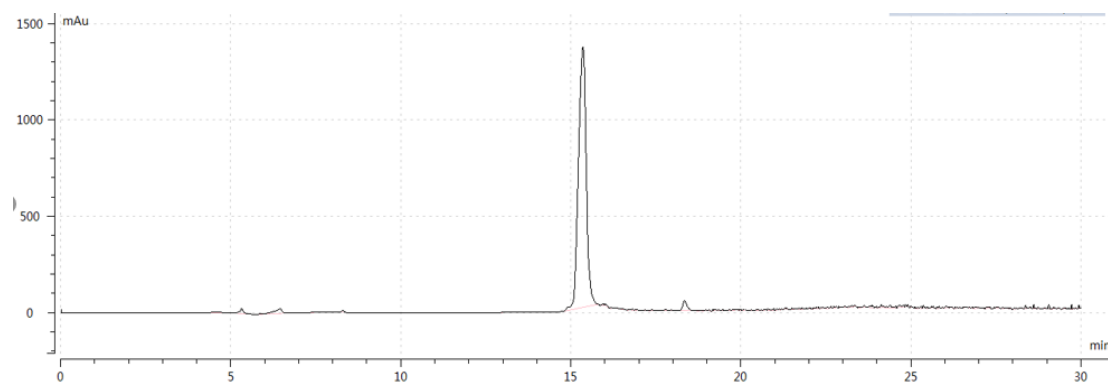

Theoretical Mass: GSTAPPAHGVTC(maltosyl)APDTRPAP

| Ion Series |                |                 |                    |                |                 |    |
|------------|----------------|-----------------|--------------------|----------------|-----------------|----|
|            | Neutral Losses | Precursor Ions  | Internal Fragments |                |                 |    |
| #1         | b <sup>+</sup> | b <sup>2+</sup> | Seq.               | y <sup>+</sup> | y <sup>2+</sup> | #2 |
| 1          | 58.02874       | 29.51801        | G                  |                |                 | 20 |
| 2          | 145.06077      | 73.03402        | S                  | 2170.00471     | 1085.50599      | 19 |
| 3          | 246.10845      | 123.55786       | T                  | 2082.97268     | 1041.98998      | 18 |
| 4          | 317.14556      | 159.07642       | A                  | 1981.92500     | 991.46614       | 17 |
| 5          | 414.19832      | 207.60280       | P                  | 1910.88789     | 955.94758       | 16 |
| 6          | 511.25109      | 256.12918       | P                  | 1813.83512     | 907.42120       | 15 |
| 7          | 582.28820      | 291.64774       | A                  | 1716.78236     | 858.89482       | 14 |
| 8          | 719.34711      | 360.17720       | H                  | 1645.74524     | 823.37626       | 13 |
| 9          | 776.36858      | 388.68793       | G                  | 1508.68633     | 754.84680       | 12 |
| 10         | 875.43699      | 438.22213       | V                  | 1451.66487     | 726.33607       | 11 |
| 11         | 976.48467      | 488.74597       | T                  | 1352.59646     | 676.80187       | 10 |
| 12         | 1403.60735     | 702.30732       | C-20-4             | 1251.54878     | 626.27803       | 9  |
| 13         | 1474.64447     | 737.82587       | A                  | 824.42609      | 412.71668       | 8  |
| 14         | 1571.69723     | 786.35225       | P                  | 753.38898      | 377.19813       | 7  |
| 15         | 1686.72417     | 843.86573       | D                  | 656.33621      | 328.67175       | 6  |
| 16         | 1787.77185     | 894.38956       | T                  | 541.30927      | 271.15827       | 5  |
| 17         | 1943.87296     | 972.44012       | R                  | 440.26159      | 220.63444       | 4  |
| 18         | 2040.92573     | 1020.96650      | P                  | 284.16048      | 142.58388       | 3  |
| 19         | 2111.96284     | 1056.48506      | A                  | 187.10772      | 94.05750        | 2  |
| 20         |                |                 | P                  | 116.07061      | 58.53894        | 1  |

## Observed Mass

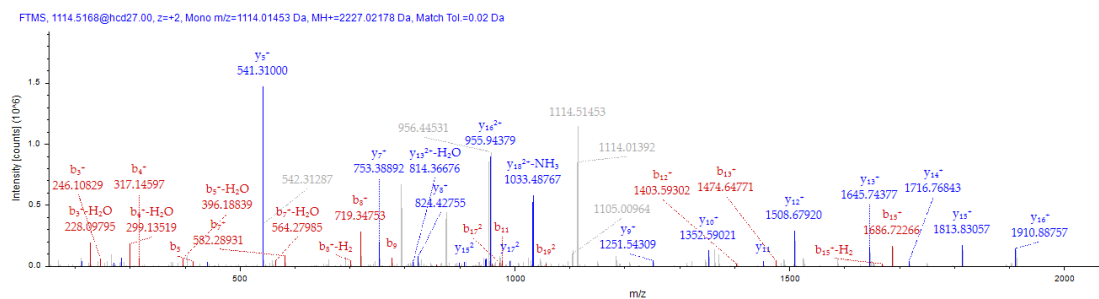

## 9. Glycosylation of Affibody

---

### 9.1 Protein Expression and Purification

Cysteine mutations were introduced into affibody by site-directed mutagenesis using QuickChange Lightning Single Site-directed Mutagenesis Kit (Agilent) following manufacturer's instructions. *E. coli* BL21 (DE3) cells transformed with pBAD-affibody (D36C)-His<sub>6</sub> plasmid were grown in 1 L of LB medium containing ampicillin (50 µg/mL) at 37 °C until OD<sub>600</sub> equaled to 0.6. Expression was induced by addition of 0.2% arabinose at 37 °C for 6 h. Harvested cell pellet was lysed by sonicating in 25 mL of 20 mM Tris and 300 mM NaCl (pH 7.4) buffer containing 0.25 mL of protease inhibitor cocktail (MedChemExpress, USA). The resulting suspension was centrifuged at 16,000 g for 50 min at 4 °C to remove cell debris. The supernatant was loaded onto columns containing 1 mL of HisPur Ni-NTA resin (Cube Biotech, Germany), washed with 40 mL of 20 mM Tris and 300 mM NaCl (pH 7.4), and then washed with 100 mL of 25 mM imidazole in 20 mM Tris and 300 mM NaCl (pH 7.4). The protein was eluted from the column with buffer containing 250 mM imidazole in 20 mM Tris and 300 mM NaCl (pH 7.4). Imidazole was removed from protein using an ultrafiltration centrifugation tube (Millipore, MWCO = 3 kDa, USA). The protein was analyzed by SDS-PAGE and LC/MS to confirm its purity. Protein aliquots were flash frozen and stored in a -80 °C freezer. The weight concentration of the protein was determined by NanoDrop to be ca. 1.67 mM.

#### Sequence:

MTSVDNKFNKELSVAGREIVTLPNLNDPQKKAFIFSLWCDPSQSANLLAEAKKLNDQA  
PKGSHHHHHH

**Calculated Mass:** 7582.5 (-M).

## Observed Mass Spectra:

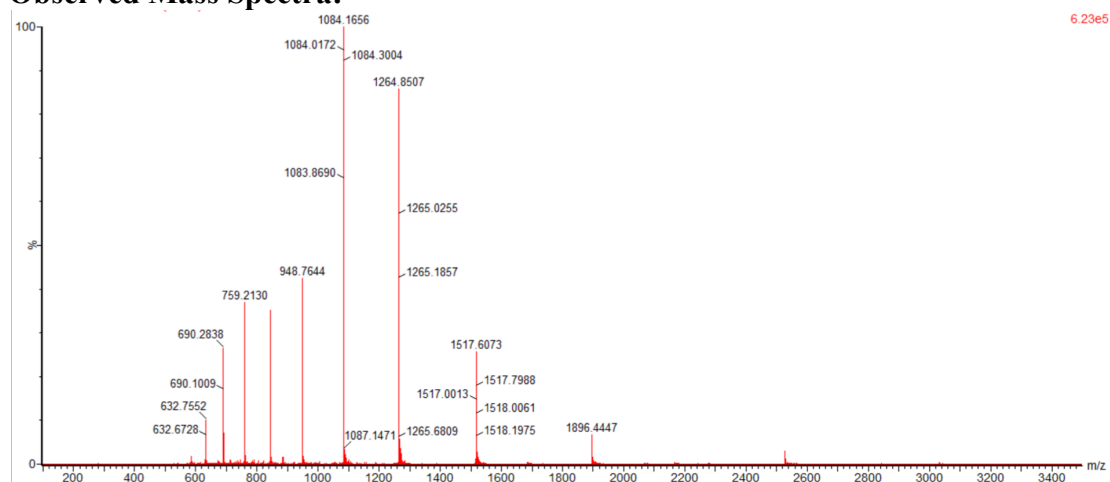

## Deconvoluted Mass:

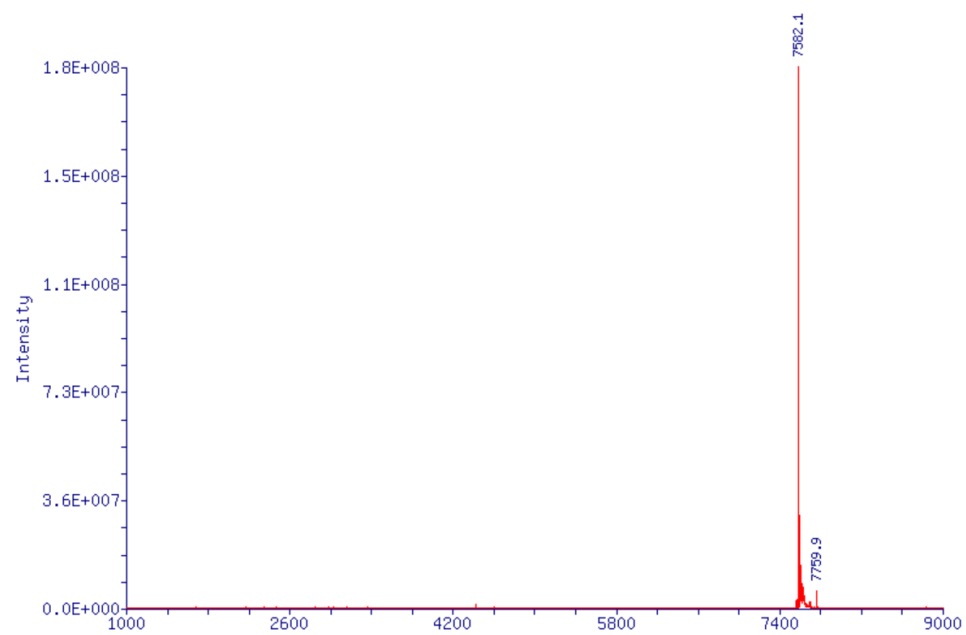

## 9.2 Protein Modification

A “glycosylation kit” was prepared by dissolving **21** (4.2 mg, 0.015 mmol), **28** (3.7 mg, 0.0225 mmol), and Eosin Y (25  $\mu$ L, 4 mg/mL in DMSO) in 500  $\mu$ L H<sub>2</sub>O.

An aliquot of the affibody solution in pH 7.4 Tris buffer (2  $\mu$ L, 1.67 mM) was added to 20  $\mu$ L of the above stock solution in a 100  $\mu$ L Eppendorf tube. The tube was then placed in a screw-capped 8 mL vial, and sealed. The vial was then placed in the photoreactor (Fig. S1), and irradiated with blue LED for 1 h. Without any further purification, the resulting solution was directly analyzed by LC/MS, which indicated full consumption of the protein starting material. LC-MS analysis was performed using Waters I-class equipped with a reverse-phase column (Aeris 3.6  $\mu$ m WIDEPORE XB-C18 50 $\times$ 2.1 mm, phenomenex) for separation, and coupled to a XEVO G2-XS QTOF. The mobile phase A was 100/0.1% water/formic acid (v/v) and the mobile phase B was 100/0.1% methanol/formic acid (v/v). The LC gradient elution condition was initially 15% B for 0.5 min, from 15% to 60% B in 6.5 min, from 60% to 95% B in 3 min, then maintained at 95% B for 2.0 min, and followed by re-equilibration to starting conditions in 3.0 min, with a flow rate of 0.4 mL/min.

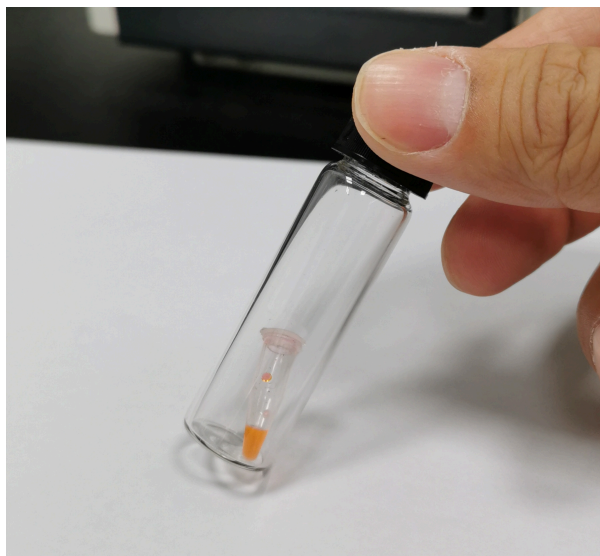

**Fig. S7. Reaction setup for protein modification.**

## Observed Mass Spectra:

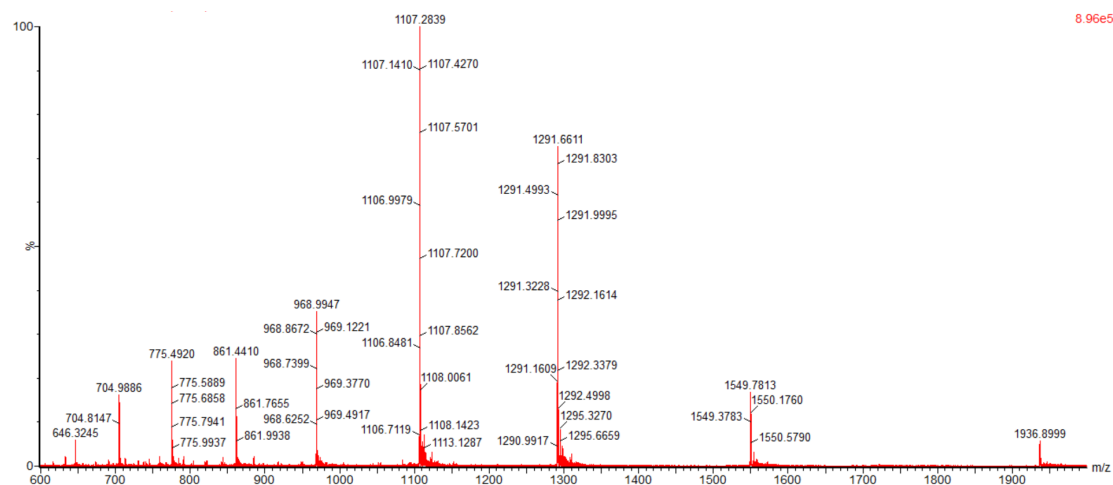

## Deconvoluted Mass:

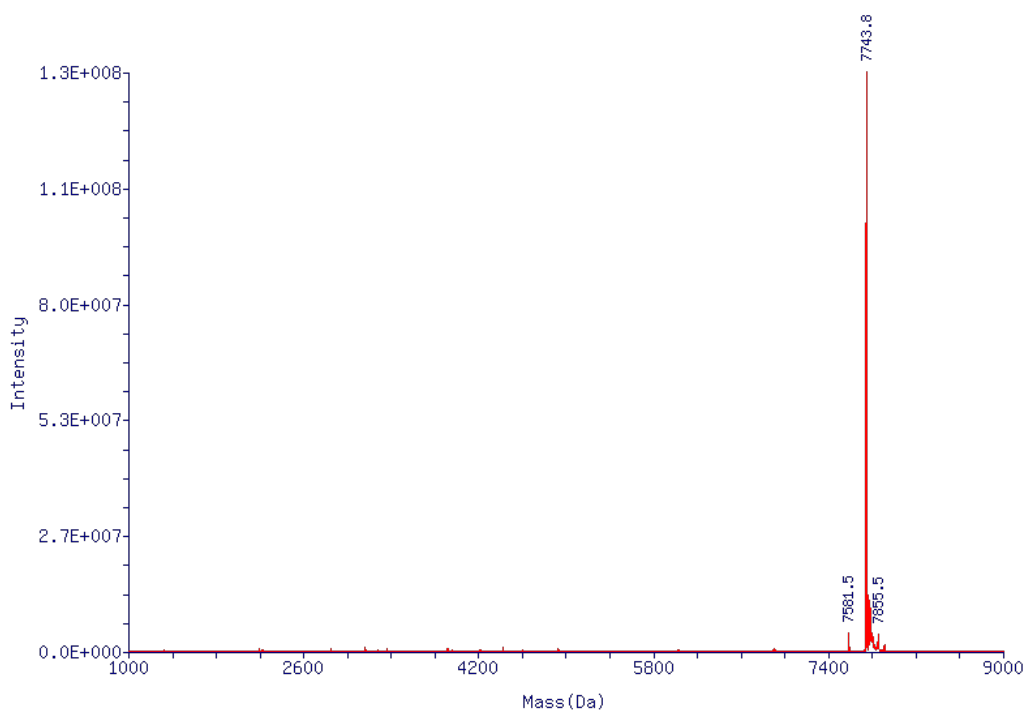

### 9.3 Protein Digestion and MS/MS Analysis

The reaction solution containing glycosylated protein was vacuum dried, and then dissolved in 50 mM ammonium bicarbonate. In-solution digestion was carried out overnight with trypsin in a 1:50 (w/w, trypsin/protein) ratio at 37 °C. Digestion was stopped by heating at 95 °C for 5 min. The resulting solution was subjected to MS/MS analysis following the protocol described in General Information. Glycosylation at cysteine was confirmed.

**Peptide Fragments Identified:** The green segment refers to the sequence of glycosylated affibody that is identified by mass spectrometry.

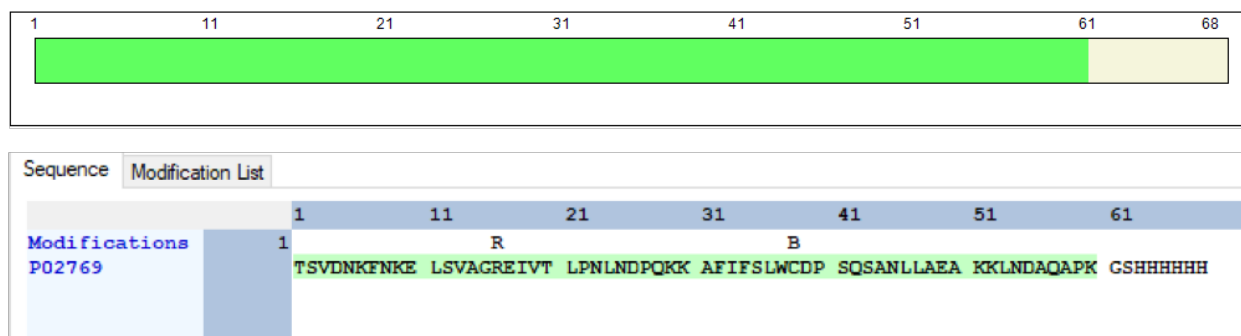

## Peptide chain with glycosylated cysteine residue:

AFIFSLWC(Glu)DPSQSANLLAEAK

Calculated Mass:

| Ion Series | Neutral Losses | Precursor Ions  | Internal Fragments |                |                 |    |
|------------|----------------|-----------------|--------------------|----------------|-----------------|----|
| #1         | b <sup>+</sup> | b <sup>2+</sup> | Seq.               | y <sup>+</sup> | y <sup>2+</sup> | #2 |
| 1          | 72.04439       | 36.52583        | A                  |                |                 | 21 |
| 2          | 219.11280      | 110.06004       | F                  | 2402.15842     | 1201.58285      | 20 |
| 3          | 332.19687      | 166.60207       | I                  | 2255.09000     | 1128.04864      | 19 |
| 4          | 479.26528      | 240.13628       | F                  | 2142.00594     | 1071.50661      | 18 |
| 5          | 566.29731      | 283.65229       | S                  | 1994.93752     | 997.97240       | 17 |
| 6          | 679.38137      | 340.19433       | L                  | 1907.90550     | 954.45639       | 16 |
| 7          | 865.46069      | 433.23398       | W                  | 1794.82143     | 897.91435       | 15 |
| 8          | 1130.52267     | 565.76497       | C-21-B             | 1608.74212     | 804.87470       | 14 |
| 9          | 1245.54961     | 623.27845       | D                  | 1343.68013     | 672.34371       | 13 |
| 10         | 1342.60238     | 671.80483       | P                  | 1228.65319     | 614.83023       | 12 |
| 11         | 1429.63441     | 715.32084       | S                  | 1131.60043     | 566.30385       | 11 |
| 12         | 1557.69298     | 779.35013       | Q                  | 1044.56840     | 522.78784       | 10 |
| 13         | 1644.72501     | 822.86614       | S                  | 916.50982      | 458.75855       | 9  |
| 14         | 1715.76213     | 858.38470       | A                  | 829.47779      | 415.24254       | 8  |
| 15         | 1829.80505     | 915.40617       | N                  | 758.44068      | 379.72398       | 7  |
| 16         | 1942.88912     | 971.94820       | L                  | 644.39775      | 322.70251       | 6  |
| 17         | 2055.97318     | 1028.49023      | L                  | 531.31369      | 266.16048       | 5  |
| 18         | 2127.01030     | 1064.00879      | A                  | 418.22962      | 209.61845       | 4  |
| 19         | 2256.05289     | 1128.53008      | E                  | 347.19251      | 174.09989       | 3  |
| 20         | 2327.09000     | 1164.04864      | A                  | 218.14992      | 109.57860       | 2  |
| 21         |                |                 | K                  | 147.11280      | 74.06004        | 1  |

Observed Mass:

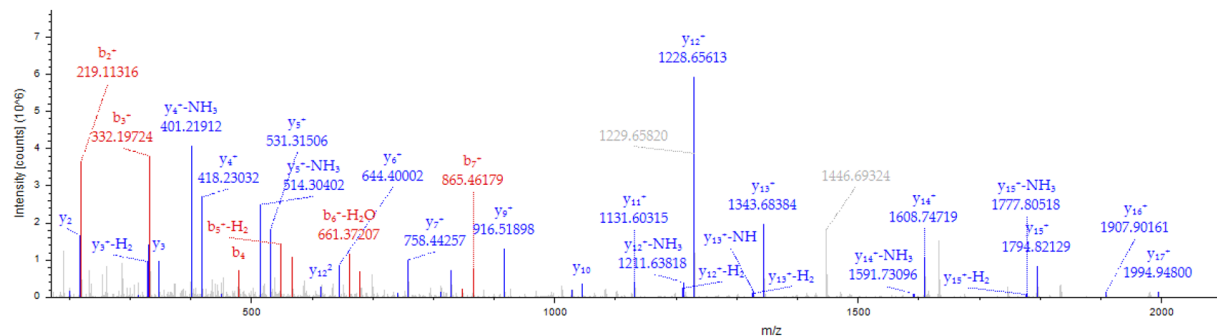



## ELSVAGR

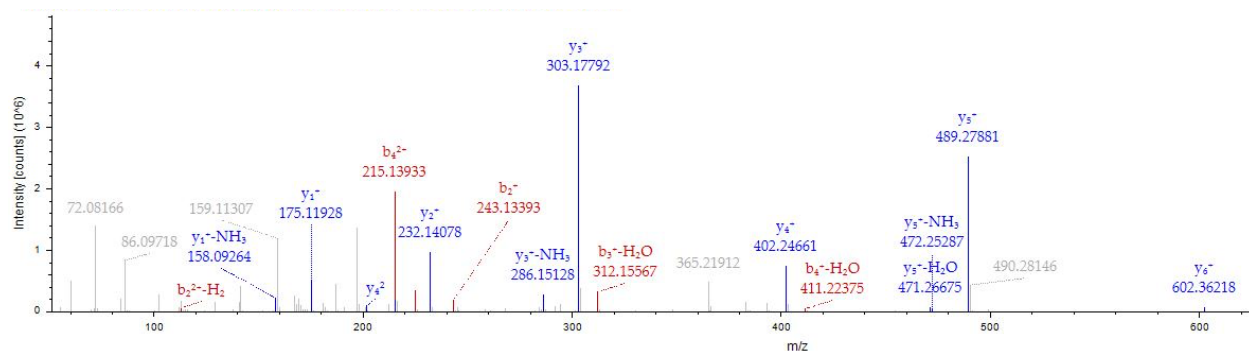

## EIVTLPLNDPQKK

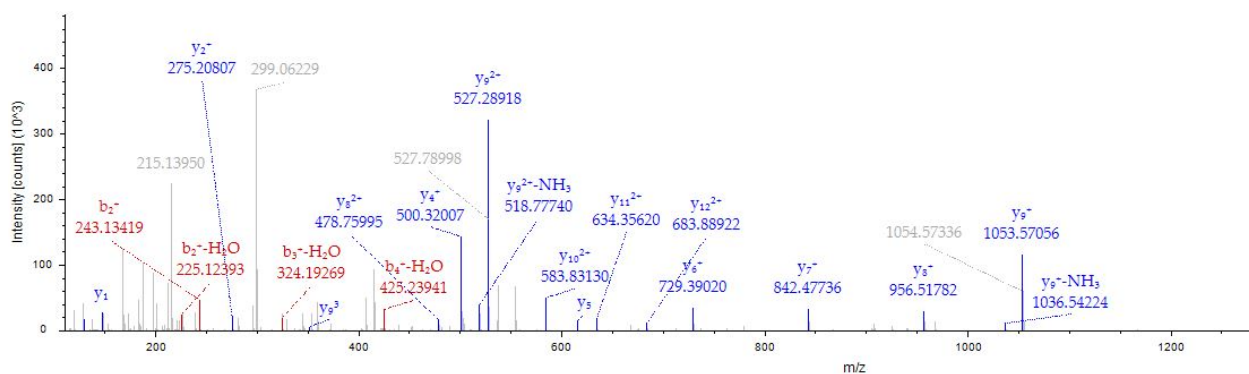

## EIVTLPLNDPQK

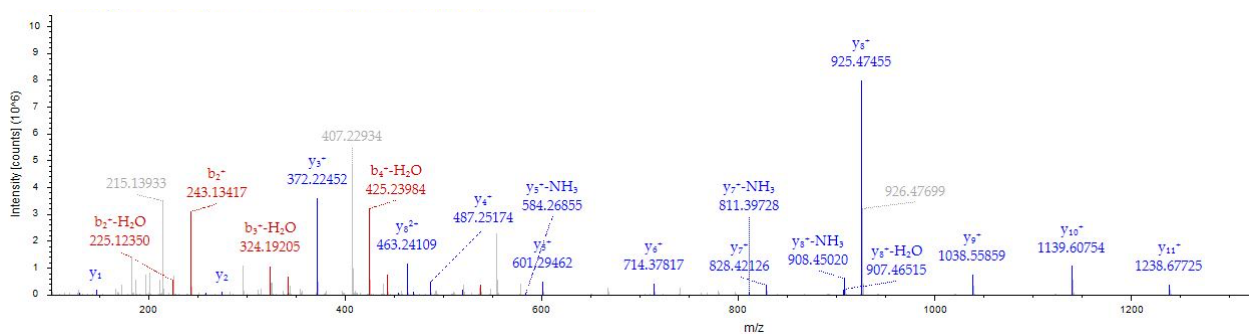

## KLNDAPK

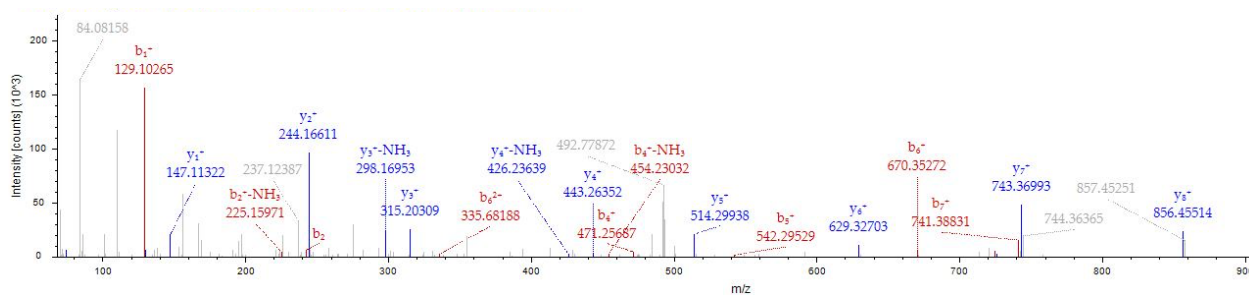

# LNDQAQPK

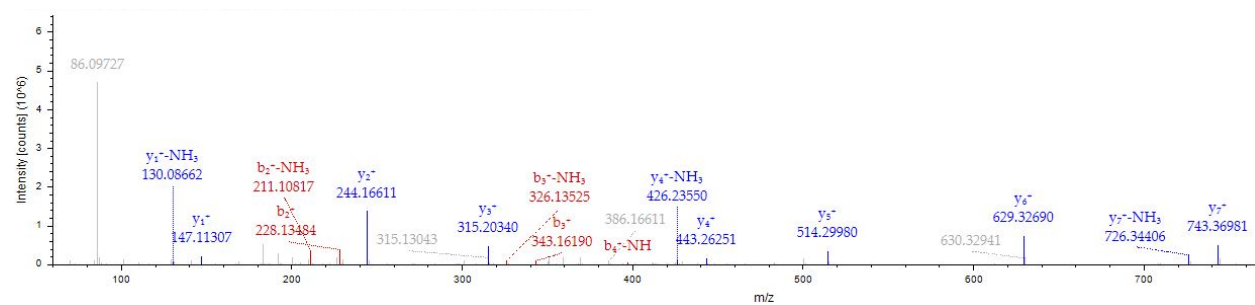

## 10. Glycosylation of NSP7

---

### 10.1 Protein Expression and Purification

The DNA of SARS-CoV-2 nsp7 was amplified by PCR and inserted into pHis-parallel2 plasmid using BamHI and XhoI sites. *E. coli* BL21 (DE3) cells transformed with pHis-parallel2 -His<sub>6</sub>-TEV-nsp7 plasmid were grown in 1 L of LB medium containing ampicillin (50 µg/mL) and chloromycetin (17 µg/mL) at 37 °C until OD<sub>600</sub> equaled to 0.8.

Expression was induced by addition of 0.2 mM IPTG at 16 °C overnight. Pellet was resuspended in lysis buffer (25 mM Tris pH 8.0, 150 mM NaCl) containing 1mM PMSF. The lysate was cleared by centrifugation and loaded onto a Ni-NTA (Qiagen) column. The His<sub>6</sub>-tagged protein was eluted in lysis buffer containing 250 mM imidazole pH 8.0. The eluate was diluted 5-fold with 25 mM Tris pH 8.0, then loaded onto a Hi-Trap Q HP column. His<sub>6</sub>-TEV-nsp7 was eluted and treated with TEV protease overnight to remove the His<sub>6</sub>-tag. The protein was load onto a Hi-Trap Q HP column to remove the His<sub>6</sub>-tag and protease. Fractions were concentrated and further purified by Superdex 75(10/300 GL) column equilibrated with 25 mM Tris pH 8.0, 150 mM NaCl. The protein was analyzed by SDS-PAGE to confirm its purity. Protein was aliquoted and stored in -80 °C. The concentration was 11.1 mg/mL, which was measured based on the UV<sub>280</sub> absorption.

#### Sequence:

GAMGSMHMSKMSDVKCTSVVLLSVLQQLRVESSSKLWAQCVQLHNDILLAKDTTEAF  
EKMVSLLSVLLSMQGAVDINKLCEEMLDNRATLQLE

**Calculated Mass:** 10284.7.

## Observed Mass Spectra:

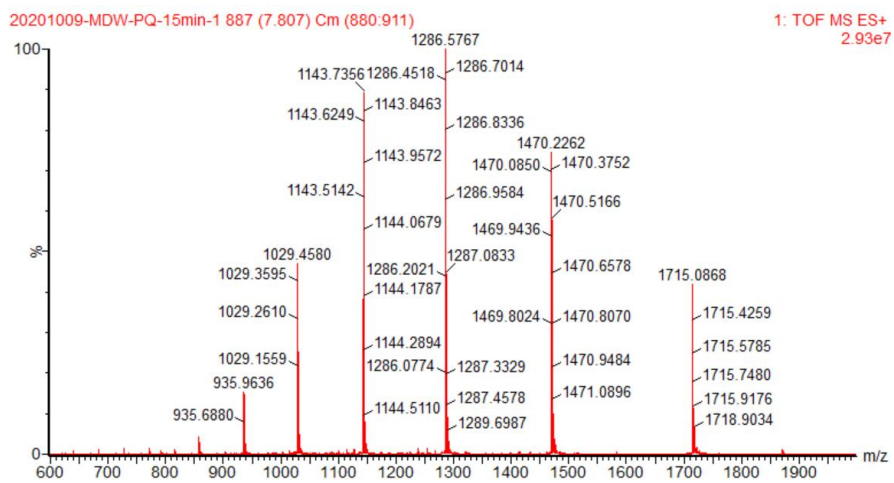

## Deconvoluted Mass:

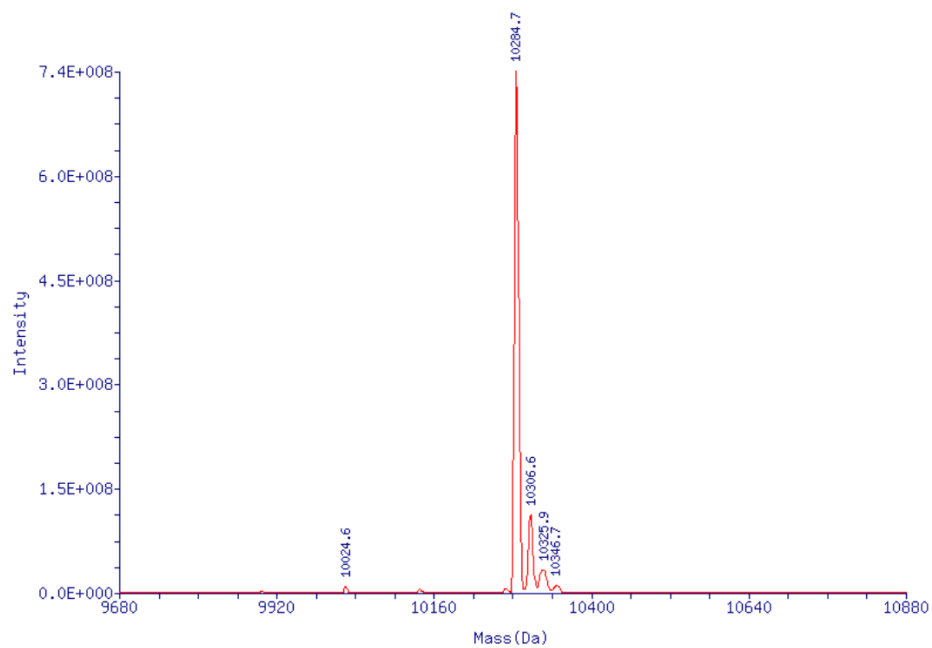

## 10.2 Protein Modification

A “glycosylation kit” was prepared by dissolving **21** (4.2 mg, 0.015 mmol), **28** (3.7 mg, 0.0225 mmol), and Eosin Y (25  $\mu$ L, 4 mg/mL in DMSO) in 500  $\mu$ L H<sub>2</sub>O.

An aliquot of the nsp7 solution in pH 7.4 Tris buffer (2  $\mu$ L, 1.06 mM) was added to 20  $\mu$ L of the above stock solution in a 100  $\mu$ L Eppendorf tube. The tube was then placed in a screw-capped 8 mL vial, and sealed. The vial was then placed in the photoreactor, and irradiated with blue LED for 30 min. The resulting solution was treated with DTT, and then directly analyzed by LC/MS. LC-MS analysis was performed using Waters I-class equipped with a reverse-phase column (Aeris 3.6  $\mu$ m WIDEPORE XB-C18 50 $\times$ 2.1 mm, phenomenex) for separation, and coupled to a XEVO G2-XS QTOF. The mobile phase A was 100/0.1% water/formic acid (v/v) and the mobile phase B was 100/0.1% methanol/formic acid (v/v). The LC gradient elution condition was initially 15% B for 0.5 min, from 15% to 60% B in 6.5 min, from 60% to 95% B in 3 min, then maintained at 95% B for 2.0 min, and followed by re-equilibration to starting conditions in 3.0 min, with a flow rate of 0.4 mL/min.

## Observed Spectra of di- and triglycosylated proteins.

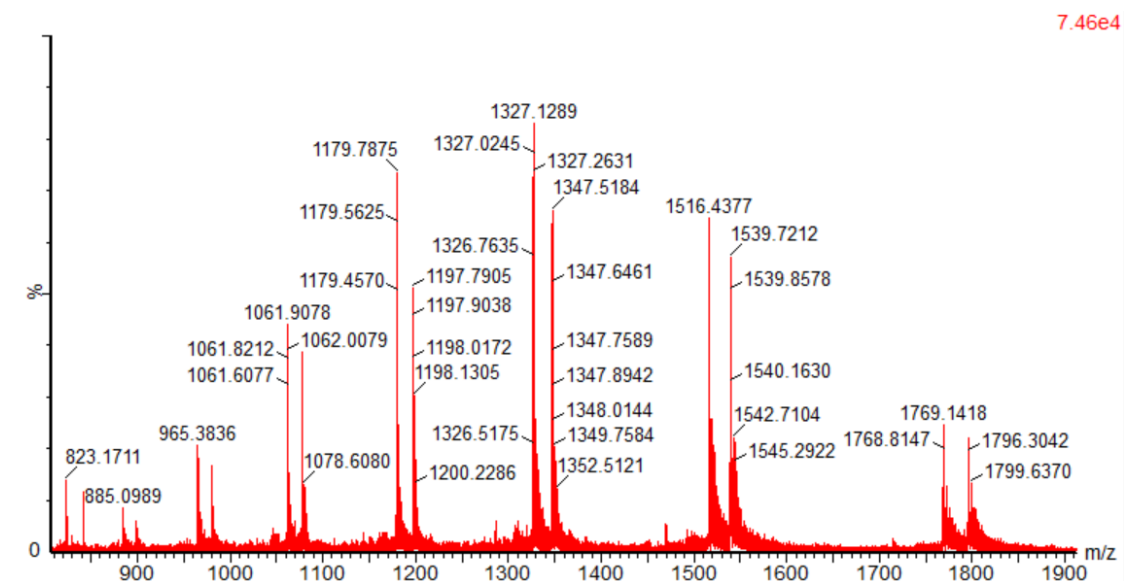

## Deconvoluted Mass:

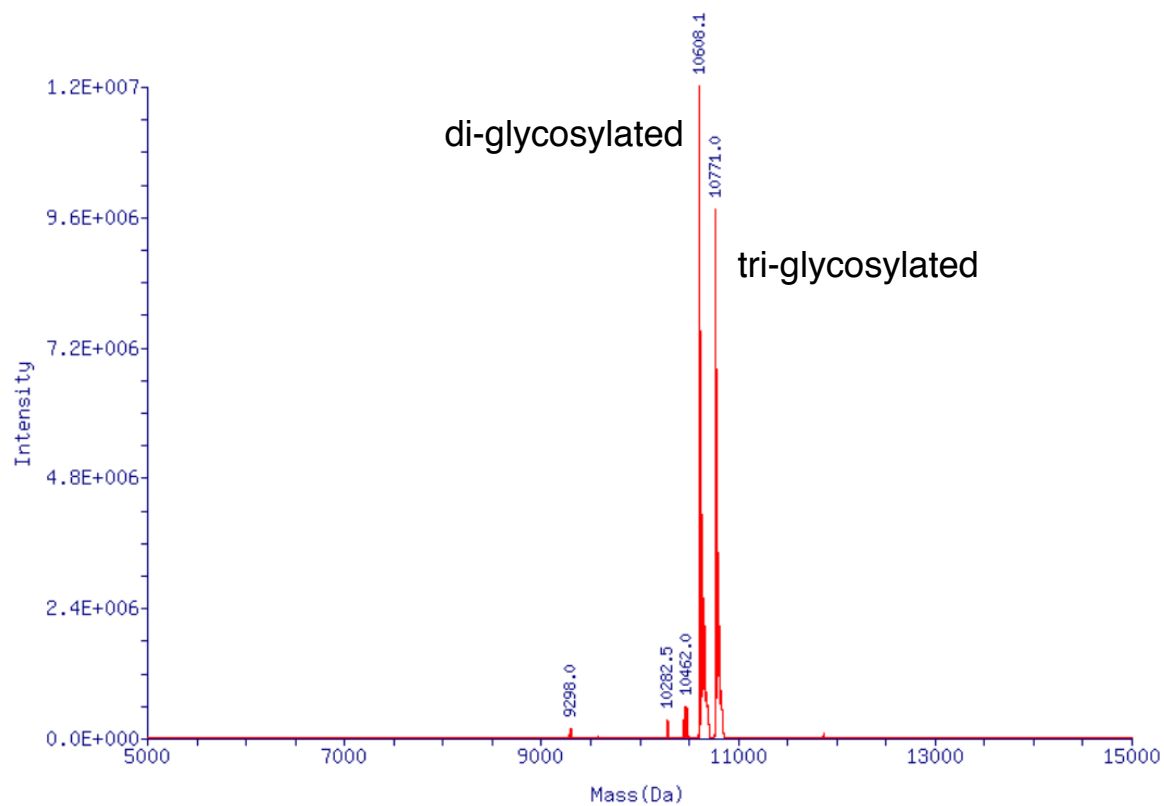

## Observed Spectra of mono- and diglycosylated proteins.

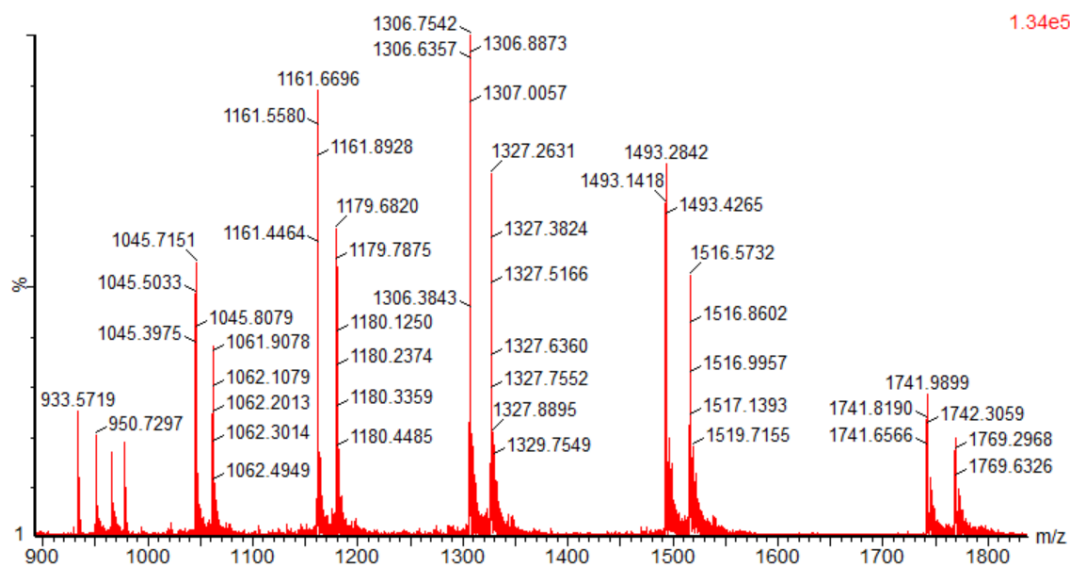

## Deconvoluted Mass:

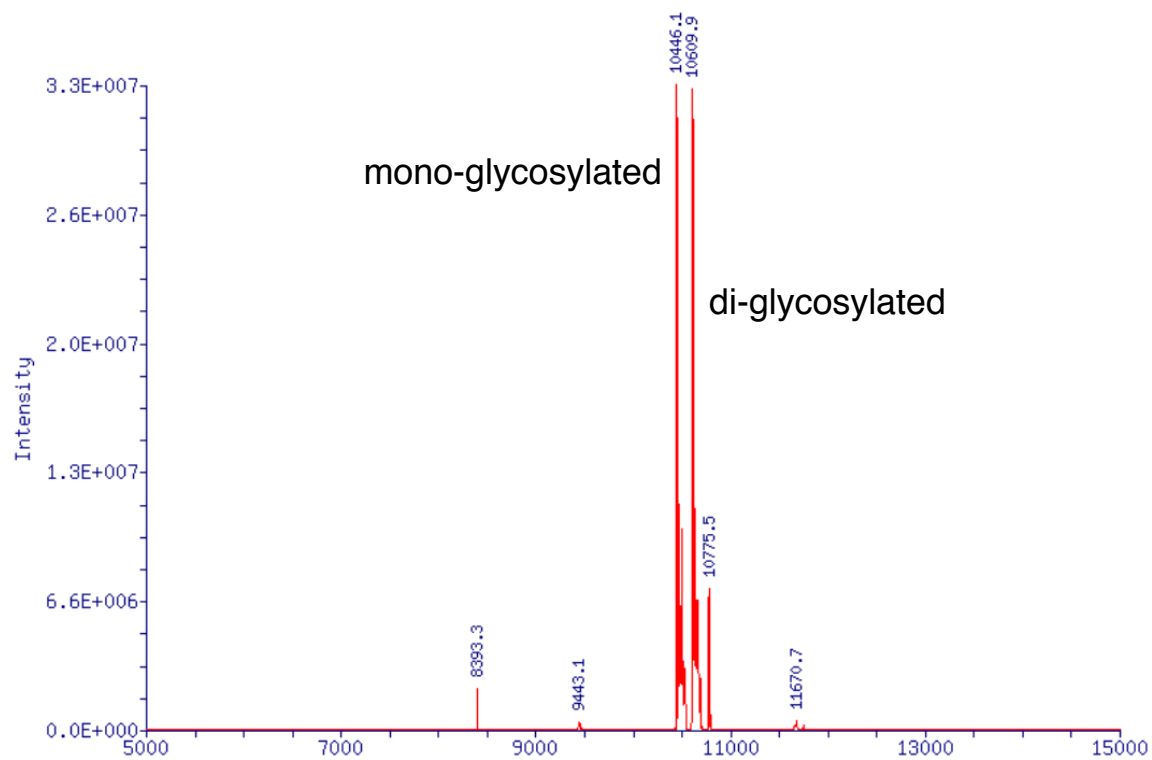

## 10.4 Protein Digestion and MS/MS Analysis

The reaction solution containing glycosylated protein was vacuum dried, and then dissolved in 50 mM ammonium bicarbonate. In-solution digestion was carried out overnight with trypsin in a 1:50 (w/w, trypsin/protein) ratio at 37 °C. Digestion was stopped by heating at 95 °C for 5 min. The resulting solution was subjected to MS/MS analysis following the protocol described in General Information. Glycosylation at cysteine was confirmed.

**Peptide Fragments Identified:** The green segment refers to the sequence of glycosylated nsp7 that is identified by mass spectrometry.

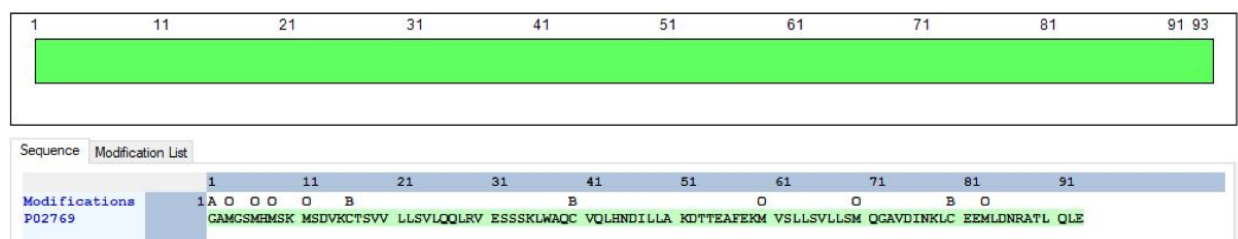

## Peptide chain with glycosylated cysteine residue:

**LC(glu)EEMLDNRATLQLE**

**Calculated Mass:**

| Ion Series | Neutral Losses | Precursor Ions  | Internal Fragments |                |                 |    |
|------------|----------------|-----------------|--------------------|----------------|-----------------|----|
| #1         | b <sup>+</sup> | b <sup>2+</sup> | Seq.               | y <sup>+</sup> | y <sup>2+</sup> | #2 |
| 1          | 114.09134      | 57.54931        | L                  |                |                 | 15 |
| 2          | 379.15333      | 190.08030       | C-21-B             | 1826.81463     | 913.91095       | 14 |
| 3          | 508.19592      | 254.60160       | E                  | 1561.75265     | 781.37996       | 13 |
| 4          | 637.23851      | 319.12289       | E                  | 1432.71005     | 716.85867       | 12 |
| 5          | 768.27900      | 384.64314       | M                  | 1303.66746     | 652.33737       | 11 |
| 6          | 881.36306      | 441.18517       | L                  | 1172.62698     | 586.81713       | 10 |
| 7          | 996.39000      | 498.69864       | D                  | 1059.54291     | 530.27509       | 9  |
| 8          | 1110.43293     | 555.72010       | N                  | 944.51597      | 472.76162       | 8  |
| 9          | 1266.53404     | 633.77066       | R                  | 830.47304      | 415.74016       | 7  |
| 10         | 1337.57115     | 669.28922       | A                  | 674.37193      | 337.68960       | 6  |
| 11         | 1438.61883     | 719.81305       | T                  | 603.33482      | 302.17105       | 5  |
| 12         | 1551.70290     | 776.35509       | L                  | 502.28714      | 251.64721       | 4  |
| 13         | 1679.76147     | 840.38438       | Q                  | 389.20308      | 195.10518       | 3  |
| 14         | 1792.84554     | 896.92641       | L                  | 261.14450      | 131.07589       | 2  |
| 15         |                |                 | E                  | 148.06043      | 74.53386        | 1  |

**Observed Mass:**

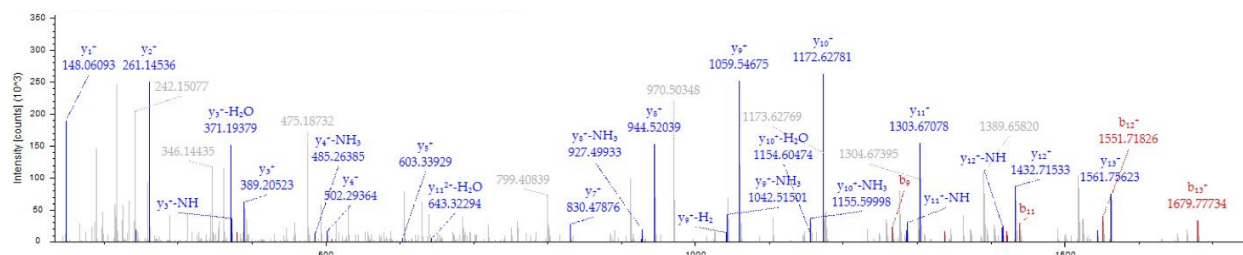

# LWAQC(glu)VQLHNDILLAKDTTEAF

Calculated Mass:

| Ion Series | Neutral Losses | Precursor Ions  | Internal Fragments |                |                 |    |
|------------|----------------|-----------------|--------------------|----------------|-----------------|----|
| #1         | b <sup>+</sup> | b <sup>2+</sup> | Seq.               | y <sup>+</sup> | y <sup>2+</sup> | #2 |
| 1          | 114.09134      | 57.54931        | L                  |                |                 | 16 |
| 2          | 300.17065      | 150.58897       | W                  | 1913.97894     | 957.49311       | 15 |
| 3          | 371.20777      | 186.10752       | A                  | 1727.89962     | 864.45345       | 14 |
| 4          | 499.26634      | 250.13681       | Q                  | 1656.86251     | 828.93489       | 13 |
| 5          | 764.32833      | 382.66780       | C-21-B             | 1528.80393     | 764.90560       | 12 |
| 6          | 863.39674      | 432.20201       | V                  | 1263.74195     | 632.37461       | 11 |
| 7          | 991.45532      | 496.23130       | Q                  | 1164.67353     | 582.84040       | 10 |
| 8          | 1104.53938     | 552.77333       | L                  | 1036.61496     | 518.81112       | 9  |
| 9          | 1241.59830     | 621.30279       | H                  | 923.53089      | 462.26908       | 8  |
| 10         | 1355.64122     | 678.32425       | N                  | 786.47198      | 393.73963       | 7  |
| 11         | 1470.66817     | 735.83772       | D                  | 672.42905      | 336.71816       | 6  |
| 12         | 1583.75223     | 792.37975       | I                  | 557.40211      | 279.20469       | 5  |
| 13         | 1696.83629     | 848.92179       | L                  | 444.31805      | 222.66266       | 4  |
| 14         | 1809.92036     | 905.46382       | L                  | 331.23398      | 166.12063       | 3  |
| 15         | 1880.95747     | 940.98237       | A                  | 218.14992      | 109.57860       | 2  |
| 16         |                |                 | K                  | 147.11280      | 74.06004        | 1  |

Observed Mass:

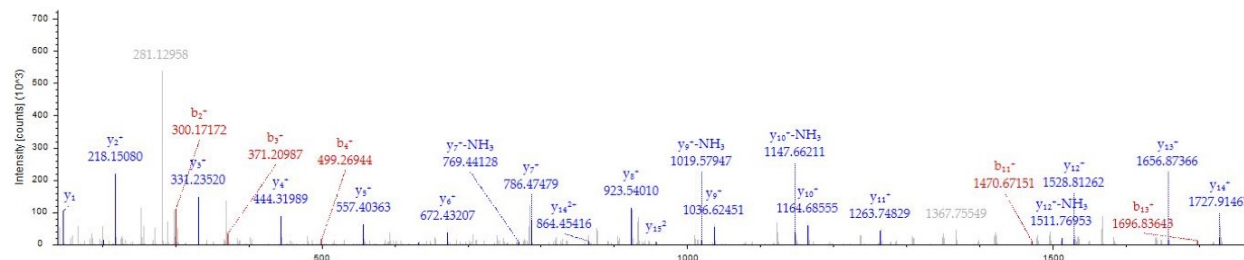

**C(glu)TSVVLLSVLQQLR**  
**Calculated Mass:**

| Ion Series | Neutral Losses | Precursor Ions  | Internal Fragments |                |                 |    |
|------------|----------------|-----------------|--------------------|----------------|-----------------|----|
| #1         | b <sup>+</sup> | b <sup>2+</sup> | Seq.               | y <sup>+</sup> | y <sup>2+</sup> | #2 |
| 1          | 266.06926      | 133.53827       | C-21-B             |                |                 | 14 |
| 2          | 367.11694      | 184.06211       | T                  | 1455.88934     | 728.44831       | 13 |
| 3          | 454.14897      | 227.57812       | S                  | 1354.84166     | 677.92447       | 12 |
| 4          | 553.21738      | 277.11233       | V                  | 1267.80963     | 634.40845       | 11 |
| 5          | 652.28580      | 326.64654       | V                  | 1168.74122     | 584.87425       | 10 |
| 6          | 765.36986      | 383.18857       | L                  | 1069.67281     | 535.34004       | 9  |
| 7          | 878.45392      | 439.73060       | L                  | 956.58874      | 478.79801       | 8  |
| 8          | 965.48595      | 483.24661       | S                  | 843.50468      | 422.25598       | 7  |
| 9          | 1064.55437     | 532.78082       | V                  | 756.47265      | 378.73996       | 6  |
| 10         | 1177.63843     | 589.32285       | L                  | 657.40423      | 329.20576       | 5  |
| 11         | 1305.69701     | 653.35214       | Q                  | 544.32017      | 272.66372       | 4  |
| 12         | 1433.75558     | 717.38143       | Q                  | 416.26159      | 208.63444       | 3  |
| 13         | 1546.83965     | 773.92346       | L                  | 288.20302      | 144.60515       | 2  |
| 14         |                |                 | R                  | 175.11895      | 88.06311        | 1  |

**Observed Mass:**

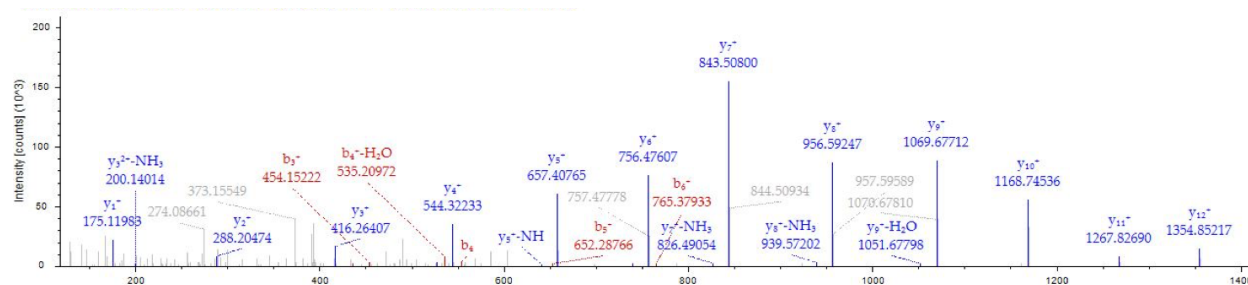

## Other peptide fragments identified:

### DTTEAFEK

| Ion Series | Neutral Losses | Precursor Ions  | Internal Fragments                     |
|------------|----------------|-----------------|----------------------------------------|
| #1         | b <sup>+</sup> | b <sup>2+</sup> | Seq. y <sup>+</sup> y <sup>2+</sup> #2 |
| 1          | 116.03422      | 58.52075        | D 8                                    |
| 2          | 217.08190      | 109.04459       | T 7                                    |
| 3          | 318.12958      | 159.56843       | T 6                                    |
| 4          | 447.17217      | 224.08972       | E 5                                    |
| 5          | 518.20928      | 259.60828       | A 4                                    |
| 6          | 665.27770      | 333.14249       | F 3                                    |
| 7          | 794.32029      | 397.66378       | E 2                                    |
| 8          |                |                 | K 1                                    |

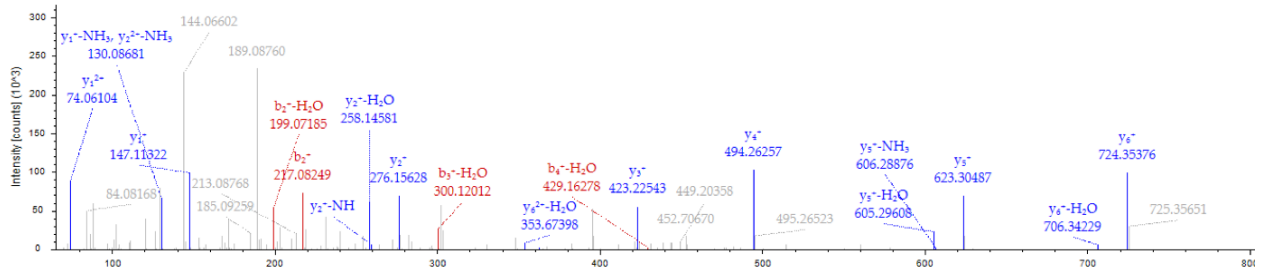

### MVSLLSVLLSMQGAVDINK

| Ion Series | Modification Losses | Neutral Losses  | Multiple Neutral Losses | Precursor Ions | Internal Fragments |    |
|------------|---------------------|-----------------|-------------------------|----------------|--------------------|----|
| #1         | b <sup>+</sup>      | b <sup>2+</sup> | Seq.                    | y <sup>+</sup> | y <sup>2+</sup>    | #2 |
| 1          | 148.04268           | 74.52498        | M-Oxidation             |                |                    | 19 |
| 2          | 247.11109           | 124.05918       | V                       | 1903.05688     | 952.03208          | 18 |
| 3          | 334.14312           | 167.57520       | S                       | 1803.98846     | 902.49787          | 17 |
| 4          | 447.22718           | 224.11723       | L                       | 1716.95643     | 858.98185          | 16 |
| 5          | 560.31125           | 280.65926       | L                       | 1603.87237     | 802.43982          | 15 |
| 6          | 647.34327           | 324.17528       | S                       | 1490.78831     | 745.89779          | 14 |
| 7          | 746.41169           | 373.70948       | V                       | 1403.75628     | 702.38178          | 13 |
| 8          | 859.49575           | 430.25151       | L                       | 1304.68786     | 652.84757          | 12 |
| 9          | 972.57982           | 486.79355       | L                       | 1191.60380     | 596.30554          | 11 |
| 10         | 1059.61184          | 530.30956       | S                       | 1078.51974     | 539.76351          | 10 |
| 11         | 1206.64724          | 603.82726       | M-Oxidation             | 991.48771      | 496.24749          | 9  |
| 12         | 1334.70582          | 667.85655       | Q                       | 844.45231      | 422.72979          | 8  |
| 13         | 1391.72729          | 696.36728       | G                       | 716.39373      | 358.70050          | 7  |
| 14         | 1462.76440          | 731.88584       | A                       | 659.37227      | 330.18977          | 6  |
| 15         | 1561.83281          | 781.42004       | V                       | 588.33515      | 294.67121          | 5  |
| 16         | 1676.85976          | 838.93352       | D                       | 489.26674      | 245.13701          | 4  |
| 17         | 1789.94382          | 895.47555       | I                       | 374.23980      | 187.62354          | 3  |
| 18         | 1903.98675          | 952.49701       | N                       | 261.15573      | 131.08150          | 2  |
| 19         |                     |                 | K                       | 147.11280      | 74.06004           | 1  |

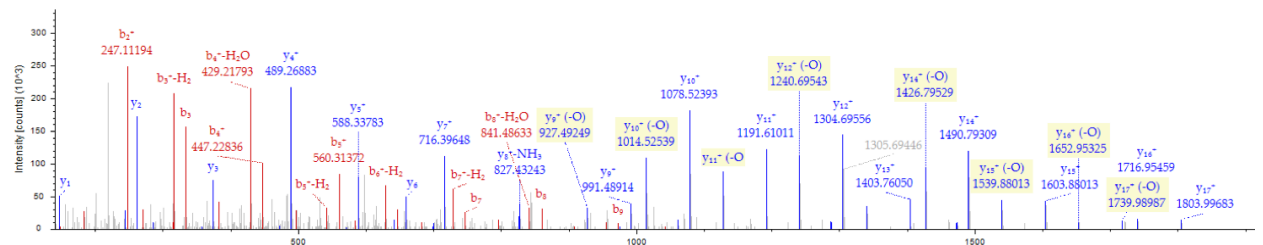

### GAMGSMHMSKMSDVK

| Ion Series |                | Neutral Losses  | Precursor Ions | Internal Fragments |                 |    |
|------------|----------------|-----------------|----------------|--------------------|-----------------|----|
| #1         | b <sup>+</sup> | b <sup>2+</sup> | Seq.           | y <sup>+</sup>     | y <sup>2+</sup> | #2 |
| 1          | 58.02874       | 29.51801        | G              |                    |                 | 15 |
| 2          | 129.06585      | 65.03657        | A              | 1539.67864         | 770.34296       | 14 |
| 3          | 260.10634      | 130.55681       | M              | 1468.64152         | 734.82440       | 13 |
| 4          | 317.12780      | 159.06754       | G              | 1337.60104         | 669.30416       | 12 |
| 5          | 404.15983      | 202.58355       | S              | 1280.57957         | 640.79343       | 11 |
| 6          | 535.20032      | 268.10380       | M              | 1193.54755         | 597.27741       | 10 |
| 7          | 672.25923      | 336.63325       | H              | 1062.50706         | 531.75717       | 9  |
| 8          | 803.29971      | 402.15349       | M              | 925.44815          | 463.22771       | 8  |
| 9          | 890.33174      | 445.66951       | S              | 794.40767          | 397.70747       | 7  |
| 10         | 1018.42670     | 509.71699       | K              | 707.37564          | 354.19146       | 6  |
| 11         | 1149.46719     | 575.23723       | M              | 579.28067          | 290.14398       | 5  |
| 12         | 1236.49922     | 618.75325       | S              | 448.24019          | 224.62373       | 4  |
| 13         | 1351.52616     | 676.26672       | D              | 361.20816          | 181.10772       | 3  |
| 14         | 1450.59457     | 725.80092       | V              | 246.18122          | 123.59425       | 2  |
| 15         |                |                 | K              | 147.11280          | 74.06004        | 1  |

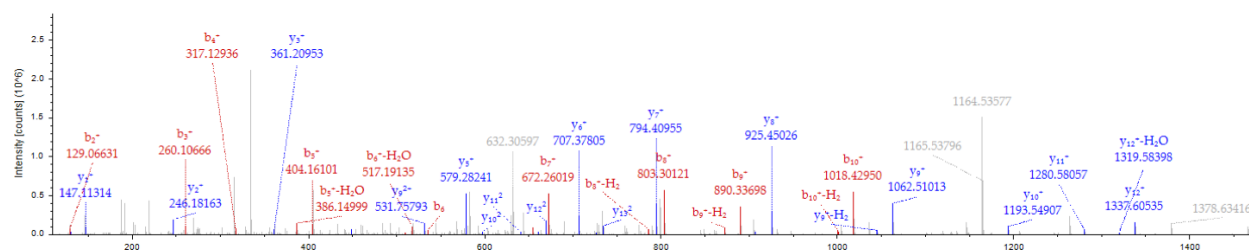

## 11. Details of Computational Studies

All geometries were optimized via density functional theory (DFT) using the B3-LYP<sup>2,3</sup> functional and a standard 6-31G(d) basis set for all atoms using Gaussian09.<sup>4</sup> Analytical frequencies of all optimized structures were computed to verify the nature of stationary points. Transition-state vibrations were verified as connecting reactants and products by viewing normal mode vibrations with imaginary frequencies.

**32**

G (A.U.) = -976.162077

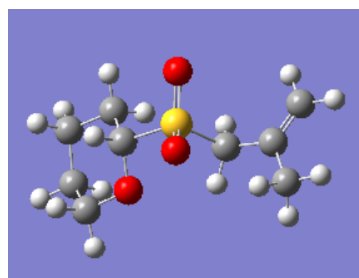

XYZ coordinates

0 1

|   |             |             |             |
|---|-------------|-------------|-------------|
| C | -3.35188900 | 0.84556500  | -0.55399000 |
| C | -1.85281000 | 1.18690400  | -0.46394400 |
| C | -1.18955000 | 0.23276600  | 0.52703300  |
| C | -2.75767200 | -1.49171900 | 0.16477800  |
| C | -3.54825700 | -0.65197200 | -0.83863000 |
| H | -1.38770100 | 1.06655800  | -1.45083300 |
| H | -1.69137200 | 2.22048900  | -0.14530200 |
| H | -3.83958100 | 1.10486400  | 0.39653800  |
| H | -3.83011900 | 1.45440200  | -1.32959700 |
| H | -2.77090400 | -2.55495700 | -0.08859200 |
| H | -3.17093200 | -1.37414100 | 1.17966900  |
| H | -3.19675200 | -0.88721700 | -1.85158800 |
| H | -4.60975300 | -0.92488100 | -0.78968500 |
| H | -1.54894600 | 0.42400200  | 1.55252900  |
| O | -1.37243300 | -1.11963200 | 0.17574900  |
| S | 0.63803800  | 0.48258100  | 0.70269100  |
| C | 1.33347900  | -0.25483700 | -0.83686000 |
| H | 0.98369700  | 0.38807500  | -1.64841700 |
| H | 0.86340300  | -1.23854200 | -0.91967400 |
| C | 3.43346400  | -1.53170600 | -0.09498000 |
| H | 4.52660800  | -1.48991200 | -0.09765700 |
| H | 3.08569500  | -1.59644100 | 0.94195800  |
| H | 3.12419100  | -2.45858300 | -0.59762000 |
| C | 2.83975500  | -0.32534100 | -0.77698700 |

|   |            |             |             |
|---|------------|-------------|-------------|
| O | 1.08015200 | -0.32179300 | 1.85403800  |
| O | 0.86133400 | 1.93918100  | 0.68280900  |
| C | 3.57834600 | 0.65813200  | -1.30214700 |
| H | 4.66404800 | 0.62990100  | -1.26565100 |
| H | 3.12819400 | 1.52629200  | -1.77552800 |

33

G (A.U.) = -1083.898395

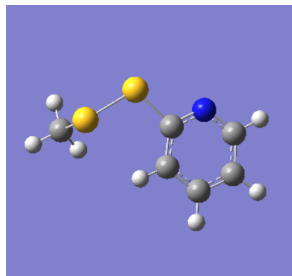

XYZ coordinates

0 1

|   |             |             |             |
|---|-------------|-------------|-------------|
| S | -2.38702600 | 0.23793000  | -0.55042800 |
| S | -0.95827600 | -1.22027700 | -0.15328700 |
| C | 0.63056900  | -0.36043000 | -0.07857900 |
| C | 0.83127500  | 0.99520300  | -0.35732300 |
| C | 2.13108400  | 1.48586800  | -0.25774600 |
| H | 0.00350600  | 1.63133200  | -0.65020100 |
| C | 2.84781400  | -0.71236500 | 0.35350700  |
| C | 3.16582200  | 0.62203400  | 0.10552900  |
| H | 2.33284200  | 2.53338100  | -0.46635700 |
| H | 3.61927300  | -1.42635500 | 0.63594500  |
| H | 4.19020800  | 0.96992700  | 0.19289400  |
| C | -2.79990800 | 0.86917600  | 1.12480400  |
| H | -1.93653100 | 1.35657600  | 1.58341400  |
| H | -3.59915700 | 1.60384000  | 0.98340300  |
| H | -3.15889200 | 0.05971600  | 1.76336400  |
| N | 1.60480700  | -1.20111100 | 0.26797300  |

34

G (A.U.) = -645.784235

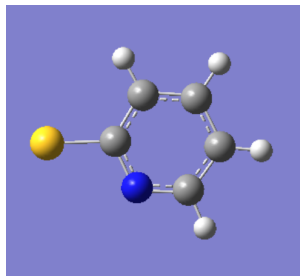

XYZ coordinates

0 2

|   |             |             |             |
|---|-------------|-------------|-------------|
| C | -0.51411500 | 0.03636800  | -0.00015700 |
| C | 0.20813700  | 1.23845900  | 0.00000000  |
| C | 1.59645000  | 1.15372300  | 0.00019100  |
| C | 2.20772200  | -0.10350800 | 0.00032700  |
| C | 1.38942700  | -1.23101300 | 0.00029100  |
| N | 0.05089900  | -1.17002200 | -0.00000100 |
| H | 2.19617000  | 2.06008800  | 0.00026400  |
| H | -0.30202300 | 2.19686000  | -0.00004800 |
| H | 3.28801500  | -0.20715400 | 0.00047800  |
| H | 1.81734400  | -2.23159100 | 0.00032200  |
| S | -2.29259500 | -0.01201400 | -0.00030800 |

**TS-I**

G (A.U.) = -1621.93834

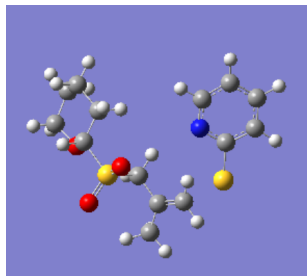

## XYZ coordinates

0 2

|   |             |             |               |
|---|-------------|-------------|---------------|
| C | -3.09924800 | 2.80316000  | 0.13288200    |
| C | -2.16759400 | 1.69241100  | 0.65330300    |
| C | -2.82106200 | 0.33727700  | 0.38806200    |
| C | -4.05658600 | 1.11275900  | -1.46532600   |
| C | -3.50354300 | 2.53069100  | -1.32454600   |
| H | -1.20610300 | 1.73938900  | 0.12657000    |
| H | -1.96785300 | 1.80099700  | 1.72310300    |
| H | -4.00003600 | 2.84504100  | 0.76180100    |
| H | -2.60721900 | 3.77830700  | 0.22305200    |
| H | -4.23323500 | 0.84209100  | -2.50944300   |
| H | -5.00693800 | 1.01082200  | -0.91655100   |
| H | -2.62936800 | 2.63618900  | -1.97990200   |
| H | -4.25594600 | 3.25330500  | -1.66427700   |
| H | -3.71962800 | 0.20659800  | 1.01523200    |
| O | -3.12363700 | 0.14102600  | -0.97278200   |
| S | -1.77577000 | -1.10370100 | 0.89751500    |
| C | -0.44089900 | -1.14170100 | -0.37031200   |
| H | 0.14176900  | -0.22277000 | -0.24785800   |
| H | -0.96193000 | -1.14312100 | -1.331066 m00 |
| C | 0.05279300  | -3.60288800 | -0.90794100   |
| H | 0.72887800  | -4.42948500 | -0.67212300   |
| H | -0.97259400 | -3.89538700 | -0.64858800   |
| H | 0.07391400  | -3.43669700 | -1.99428500   |
| C | 0.42520300  | -2.35092100 | -0.17347300   |
| O | -2.59240400 | -2.32109100 | 0.75335100    |
| O | -1.19167900 | -0.75443500 | 2.20523900    |
| C | 1.53100900  | -2.26037600 | 0.63004600    |
| H | 2.11752200  | -3.14382100 | 0.86061200    |
| H | 1.68555900  | -1.38770600 | 1.25473700    |
| S | 3.25032700  | -1.33834900 | -0.99187600   |
| C | 3.35611800  | 0.30733100  | -0.33905300   |
| C | 4.62026900  | 0.92506900  | -0.25735100   |
| C | 2.33281500  | 2.18068000  | 0.52063300    |
| C | 4.69916100  | 2.23433400  | 0.20101200    |
| H | 5.51001600  | 0.37547000  | -0.54607100   |

|   |            |            |            |
|---|------------|------------|------------|
| C | 3.53109900 | 2.88481900 | 0.60634400 |
| H | 1.39979300 | 2.63944500 | 0.84443200 |
| H | 5.66239700 | 2.73436500 | 0.26098300 |
| H | 3.54788600 | 3.90135300 | 0.98629600 |
| N | 2.22925200 | 0.93265300 | 0.04442600 |

35

G (A.U.) = -1621.948571

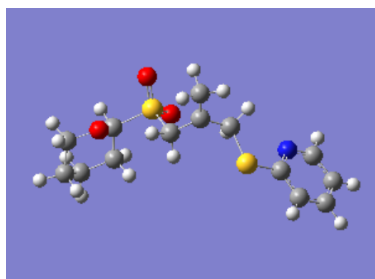

XYZ coordinates

0 2

|   |             |             |             |
|---|-------------|-------------|-------------|
| C | 4.45941600  | -2.47513100 | 0.12986100  |
| C | 3.14700500  | -1.76896000 | 0.51998800  |
| C | 3.39926700  | -0.26452100 | 0.58958500  |
| C | 5.17390200  | -0.32586200 | -0.96513900 |
| C | 5.05824100  | -1.84044100 | -1.13493600 |
| H | 2.37952500  | -1.97439900 | -0.23722700 |
| H | 2.76599900  | -2.12380300 | 1.48167000  |
| H | 5.17728600  | -2.38944700 | 0.95811700  |
| H | 4.27889300  | -3.54549900 | -0.02069900 |
| H | 5.47523300  | 0.16992800  | -1.89150800 |
| H | 5.91211500  | -0.07769700 | -0.18529000 |
| H | 4.41362500  | -2.05138400 | -1.99805500 |
| H | 6.04701800  | -2.26191400 | -1.35470300 |
| H | 4.06106700  | -0.01648600 | 1.43686200  |
| O | 3.90917300  | 0.25447800  | -0.61664600 |
| S | 1.87688500  | 0.72932800  | 0.96475700  |
| C | 0.90659500  | 0.72732600  | -0.63454400 |
| H | 0.62268100  | -0.31861600 | -0.78973700 |
| H | 1.63446800  | 1.03581300  | -1.38953100 |
| C | -0.11600000 | 3.08174800  | -0.87525100 |
| H | -1.08621900 | 3.53860400  | -1.09885600 |
| H | 0.33399800  | 3.63851500  | -0.03774000 |
| H | 0.54570100  | 3.23254200  | -1.73764300 |
| C | -0.26230600 | 1.63226400  | -0.53595100 |
| O | 2.30349000  | 2.11197500  | 1.23883700  |
| O | 1.12036100  | -0.02832300 | 1.98141700  |
| C | -1.53584100 | 1.10816100  | 0.02776300  |
| H | -2.15688300 | 1.89752300  | 0.45575700  |
| H | -1.37701300 | 0.34220100  | 0.79055700  |
| S | -2.52665200 | 0.31147500  | -1.35056400 |
| C | -3.94347400 | -0.31126600 | -0.45863400 |
| C | -4.91775700 | -1.02569400 | -1.18032900 |
| C | -5.10809800 | -0.55018300 | 1.49965300  |
| C | -6.02313700 | -1.50507800 | -0.49135700 |
| H | -4.80106300 | -1.19388100 | -2.24671800 |

|   |             |             |             |
|---|-------------|-------------|-------------|
| C | -6.12874900 | -1.26621500 | 0.88330500  |
| H | -5.14338200 | -0.33899100 | 2.56703700  |
| H | -6.79495800 | -2.06040800 | -1.01794900 |
| H | -6.97680000 | -1.62497600 | 1.45782600  |
| N | -4.03337300 | -0.07605900 | 0.85111300  |

## TS-II

G (A.U.) = -1621.944500

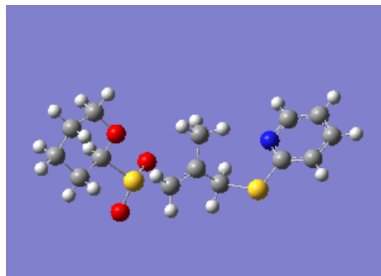

### XYZ coordinates

0 2

|   |             |             |             |
|---|-------------|-------------|-------------|
| C | 5.71810200  | 0.55977900  | -0.53447900 |
| C | 4.62985900  | -0.51819900 | -0.37014500 |
| C | 3.54915700  | 0.01110100  | 0.56425900  |
| C | 3.96132300  | 2.26914900  | 0.03344900  |
| C | 5.09130900  | 1.90630700  | -0.92999200 |
| H | 4.18271100  | -0.74751400 | -1.34610100 |
| H | 5.04084700  | -1.44965500 | 0.02903700  |
| H | 6.25989200  | 0.67412500  | 0.41521100  |
| H | 6.45450700  | 0.24004000  | -1.28065500 |
| H | 3.41093400  | 3.15526200  | -0.29383100 |
| H | 4.35993100  | 2.46437200  | 1.04231100  |
| H | 4.68239800  | 1.84298000  | -1.94685800 |
| H | 5.84402500  | 2.70460000  | -0.93040500 |
| H | 3.92256300  | 0.11660800  | 1.59655500  |
| O | 2.98704600  | 1.21901300  | 0.10727200  |
| S | 2.10400400  | -1.17189900 | 0.75488200  |
| C | 0.79203600  | -0.83908000 | -1.08136900 |
| H | 0.81105200  | -1.88912800 | -1.36780300 |
| H | 1.49996100  | -0.20246700 | -1.60742600 |
| C | -0.55450800 | 1.20484400  | -0.45673200 |
| H | -1.50467800 | 1.55560500  | -0.87757100 |
| H | -0.56719100 | 1.45713700  | 0.61303500  |
| H | 0.26781200  | 1.75369900  | -0.92287700 |
| C | -0.40234200 | -0.27505400 | -0.62975700 |
| O | 1.34149300  | -0.71963600 | 1.94117200  |
| O | 2.69524600  | -2.53593000 | 0.72915700  |
| C | -1.50848900 | -1.15700600 | -0.14364500 |
| H | -1.88687700 | -0.83174800 | 0.83120000  |
| H | -1.20045600 | -2.20324700 | -0.08251100 |
| S | -2.98950000 | -1.12976900 | -1.26859200 |
| C | -4.16730800 | -0.14266700 | -0.34835600 |
| C | -5.43307400 | 0.05655500  | -0.92932200 |
| C | -4.73828500 | 1.08802700  | 1.49970400  |
| C | -6.36420500 | 0.81144900  | -0.22942100 |
| H | -5.66918300 | -0.37415300 | -1.89768200 |

|   |             |            |             |
|---|-------------|------------|-------------|
| C | -6.01709000 | 1.34387700 | 1.01714900  |
| H | -4.41698300 | 1.47960100 | 2.46307200  |
| H | -7.35179900 | 0.98340800 | -0.64922100 |
| H | -6.71668000 | 1.93939300 | 1.59476400  |
| N | -3.82629300 | 0.36224600 | 0.83546300  |

36

G (A.U.) = -819.608214

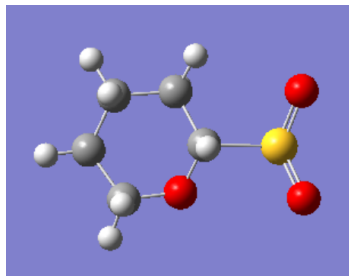

XYZ coordinates

0 2

|   |             |             |             |
|---|-------------|-------------|-------------|
| C | -2.18334700 | 1.19544500  | 0.25892600  |
| C | -0.69434400 | 1.29356000  | -0.13115800 |
| C | -0.00431100 | 0.00814700  | 0.30047700  |
| C | -1.94179300 | -1.30645700 | 0.16126200  |
| C | -2.79504200 | -0.11260000 | -0.26674500 |
| H | -0.60142800 | 1.40229800  | -1.21903600 |
| H | -0.21064900 | 2.15571300  | 0.33619200  |
| H | -2.27425900 | 1.22953900  | 1.35382800  |
| H | -2.72625400 | 2.06420400  | -0.12987900 |
| H | -2.26964400 | -2.23830500 | -0.30546800 |
| H | -1.97448000 | -1.43654500 | 1.25522100  |
| H | -2.84352300 | -0.08755400 | -1.36278600 |
| H | -3.81945500 | -0.24214400 | 0.10364700  |
| H | 0.08416400  | -0.06744400 | 1.39760000  |
| O | -0.57624200 | -1.13689300 | -0.25327100 |
| S | 1.81078200  | -0.02518600 | -0.27653800 |
| O | 2.39962000  | -1.27776900 | 0.26651900  |
| O | 2.34862800  | 1.30899400  | 0.11909100  |

**SI-II-p**

G (A.U.) = -802.361759

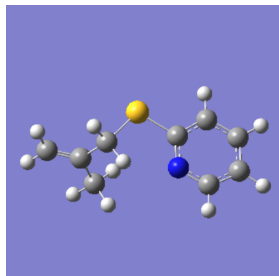

## XYZ coordinates

0 1

|   |             |             |             |
|---|-------------|-------------|-------------|
| C | -4.03963200 | -0.08542300 | 0.06138800  |
| H | -4.40405200 | 0.62446400  | 0.80016700  |
| H | -4.78705300 | -0.54290700 | -0.58177500 |
| C | -2.21477300 | -1.36432700 | -1.06657200 |
| H | -1.49657000 | -0.88080500 | -1.74034800 |
| H | -1.67948700 | -2.18820400 | -0.57737400 |
| H | -3.02358300 | -1.78419100 | -1.67193300 |
| C | -2.74062700 | -0.38470000 | -0.04904600 |
| C | -1.73128400 | 0.23871700  | 0.88146400  |
| H | -1.09645100 | -0.51806500 | 1.35394500  |
| H | -2.22186200 | 0.83245900  | 1.65646400  |
| S | -0.54990700 | 1.38523800  | 0.03298800  |
| C | 0.98608500  | 0.46627600  | 0.05024800  |
| C | 2.11352000  | 1.09009500  | -0.51576700 |
| C | 2.20055700  | -1.40445500 | 0.58313300  |
| C | 3.31811200  | 0.40122900  | -0.51105900 |
| H | 2.03483700  | 2.08600500  | -0.94122800 |
| C | 3.37263900  | -0.87934700 | 0.05078500  |
| H | 2.18889100  | -2.39645600 | 1.03139700  |
| H | 4.20730500  | 0.85614900  | -0.93954100 |
| H | 4.29486600  | -1.45094300 | 0.07340200  |
| N | 1.02772600  | -0.75281300 | 0.58594000  |

### TS-III

G (A.U.) = -819.602781

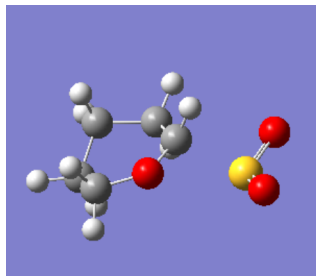

#### XYZ coordinates

0 2

|   |             |             |             |
|---|-------------|-------------|-------------|
| C | -2.24506600 | 1.15174700  | 0.19042600  |
| C | -0.72029400 | 1.31759700  | 0.16254100  |
| C | -0.01699100 | 0.03823000  | 0.61287600  |
| C | -1.97868600 | -1.32188300 | -0.03233900 |
| C | -2.59845700 | -0.07596600 | -0.65265100 |
| H | -0.42548900 | 1.56943100  | -0.86376800 |
| H | -0.37458100 | 2.14021400  | 0.79390700  |
| H | -2.60626500 | 1.02251500  | 1.21989300  |
| H | -2.72142800 | 2.05430800  | -0.20686800 |
| H | -1.97079700 | -2.16635300 | -0.72717100 |
| H | -2.55353300 | -1.61871900 | 0.85524500  |
| H | -2.23187100 | 0.06680300  | -1.67759200 |
| H | -3.68223000 | -0.22958500 | -0.71585800 |
| H | 0.39340500  | 0.08511900  | 1.62778800  |
| O | -0.61256700 | -1.17408100 | 0.41264000  |
| S | 1.76142200  | -0.02324100 | -0.36701700 |
| O | 2.41998100  | -1.27519500 | 0.09022000  |
| O | 2.36096000  | 1.29799700  | -0.01766200 |

37

G (A.U.) = -271.006025

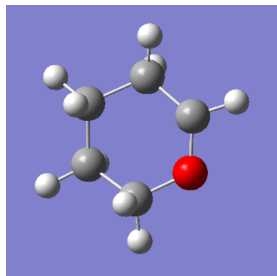

XYZ coordinates

0 2

|   |             |             |             |
|---|-------------|-------------|-------------|
| C | 1.00715300  | 1.01863800  | 0.25870900  |
| C | 1.40617600  | -0.41090500 | -0.14540000 |
| C | -1.38479500 | 0.26951400  | 0.19913300  |
| C | -0.39464300 | 1.32703500  | -0.28514800 |
| H | 1.63416100  | -0.41575600 | -1.22939100 |
| H | 2.32734100  | -0.72407500 | 0.36147000  |
| H | 0.99686400  | 1.10123300  | 1.35413800  |
| H | 1.73999200  | 1.74364900  | -0.11428400 |
| H | -2.37304600 | 0.40082300  | -0.25039000 |
| H | -1.49108800 | 0.32698800  | 1.29309000  |
| H | -0.37728300 | 1.33029200  | -1.38349400 |
| H | -0.73996600 | 2.31737200  | 0.03809700  |
| O | -0.98377200 | -1.06245200 | -0.15125800 |
| C | 0.31180300  | -1.39145300 | 0.15831300  |
| H | 0.47903300  | -2.45789000 | 0.02719000  |

**SI-III-p**

G (A.U.) = -548.604899

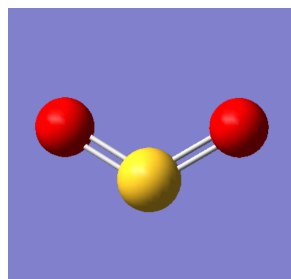

XYZ coordinates

0 1

|   |            |             |             |
|---|------------|-------------|-------------|
| S | 0.00000000 | 0.00000000  | 0.37079200  |
| O | 0.00000000 | 1.26188700  | -0.37079200 |
| O | 0.00000000 | -1.26188700 | -0.37079200 |

# TS-IV

G (A.U.) = -1354.876251

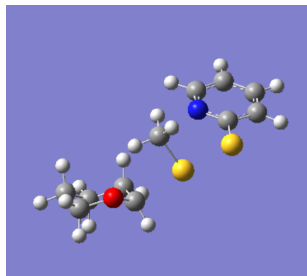

## XYZ coordinates

0 2

|   |             |             |             |
|---|-------------|-------------|-------------|
| S | 0.29697600  | 1.44255400  | -0.24213000 |
| S | -1.88998500 | 1.88890900  | -0.26895400 |
| C | -2.66405400 | 0.28787800  | -0.06633000 |
| C | -3.96212800 | 0.12563100  | -0.58435000 |
| C | -4.60851300 | -1.08863100 | -0.38670200 |
| H | -4.43639100 | 0.93400000  | -1.13169400 |
| C | -2.65231100 | -1.85313500 | 0.75241100  |
| C | -3.94270400 | -2.10997900 | 0.29589900  |
| H | -5.61297600 | -1.24189300 | -0.77287500 |
| H | -2.09207000 | -2.62143900 | 1.28355600  |
| H | -4.40636800 | -3.07669200 | 0.46568500  |
| N | -2.02054400 | -0.68259700 | 0.59106300  |
| C | 0.53223800  | 1.31482700  | 1.57361400  |
| H | -0.02838300 | 0.45881800  | 1.95109100  |
| H | 1.60393600  | 1.19203800  | 1.74480200  |
| H | 0.18696500  | 2.23584600  | 2.04638500  |
| C | 3.40798500  | -1.92739800 | -0.69515500 |
| H | 3.20555800  | -2.99448800 | -0.54440200 |
| H | 3.90914600  | -1.83038600 | -1.66863300 |
| C | 4.52327300  | 0.12033800  | 0.22934500  |
| H | 5.09551100  | 0.32103300  | -0.68957700 |
| H | 5.05586400  | 0.57051400  | 1.07101900  |
| C | 4.32208700  | -1.38117900 | 0.40984700  |
| H | 5.30109600  | -1.87733200 | 0.39791600  |
| H | 3.87198100  | -1.57098300 | 1.39323700  |
| C | 2.08464800  | -1.12954200 | -0.70520600 |
| H | 1.52531800  | -1.35779700 | 0.21160300  |
| H | 1.44631400  | -1.41441900 | -1.54755600 |
| C | 2.36312800  | 0.34837200  | -0.76369500 |
| H | 2.43758300  | 0.82219800  | -1.74636500 |
| O | 3.26837100  | 0.83533300  | 0.15220700  |

**TS-V**

G (A.U.) = -1354.886441

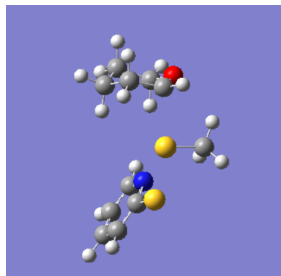

## XYZ coordinates

0 2

|   |             |             |             |
|---|-------------|-------------|-------------|
| S | 0.66117800  | 1.52002200  | -0.07101300 |
| S | -1.48357800 | 1.91800300  | -0.52286000 |
| C | -2.29562500 | 0.35889100  | -0.18383400 |
| C | -3.54000700 | 0.13301800  | -0.80238500 |
| C | -4.22190600 | -1.04237900 | -0.51499400 |
| H | -3.94651900 | 0.86509400  | -1.49302400 |
| C | -2.40475900 | -1.65482400 | 0.90890500  |
| C | -3.64582800 | -1.96651400 | 0.36155300  |
| H | -5.18531000 | -1.24178400 | -0.97727700 |
| H | -1.91512900 | -2.34572500 | 1.59387600  |
| H | -4.14086000 | -2.89995600 | 0.61032300  |
| N | -1.73773400 | -0.51925900 | 0.65659500  |
| C | 2.46581900  | -1.27937200 | -1.54154600 |
| H | 1.38441100  | -1.11139200 | -1.60532200 |
| H | 2.78154200  | -1.75268300 | -2.47816900 |
| C | 2.76945000  | -2.18551900 | -0.34079600 |
| H | 2.21062900  | -3.12744900 | -0.40391300 |
| H | 3.83747500  | -2.44149300 | -0.31760100 |
| C | 2.39051100  | -1.47369000 | 0.95388300  |
| H | 2.69035900  | -2.03845000 | 1.84001900  |
| H | 1.30900800  | -1.28950600 | 0.99147100  |
| C | 3.17936900  | 0.06895100  | -1.36245100 |
| H | 2.84275100  | 0.80304900  | -2.10282700 |
| H | 4.26292900  | -0.06968700 | -1.52678300 |
| C | 2.98242700  | 0.63534400  | 0.01850000  |
| H | 3.45423800  | 1.58754200  | 0.25421700  |
| O | 3.06006900  | -0.19923300 | 1.08899700  |
| C | 0.57796500  | 1.73564800  | 1.75271100  |
| H | -0.14982000 | 1.03085500  | 2.15690500  |
| H | 1.56754100  | 1.51335700  | 2.15834400  |
| H | 0.29424300  | 2.76120300  | 1.99631400  |

38

G (A.U.) = -709.128690

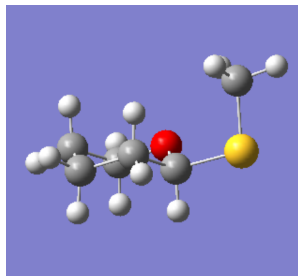

XYZ coordinates

0 1

|   |             |             |             |
|---|-------------|-------------|-------------|
| S | -2.04493500 | 0.05921700  | -0.59548300 |
| C | -2.36597700 | -0.11640600 | 1.19783900  |
| H | -1.76481400 | -0.93343500 | 1.60147100  |
| H | -2.16790500 | 0.80754600  | 1.74777800  |
| H | -3.42526400 | -0.36597600 | 1.29860700  |
| C | 1.67187200  | -1.29545200 | -0.17448500 |
| C | 2.43152200  | -0.16915500 | 0.52657100  |
| C | 1.96369000  | 1.19003900  | -0.01190200 |
| C | 0.42910500  | 1.29164000  | 0.05226900  |
| C | -0.21279600 | 0.07357600  | -0.62343200 |
| H | 2.42323300  | 2.01267200  | 0.54905100  |
| H | 2.23831900  | -0.22991900 | 1.60566700  |
| H | 3.51101100  | -0.30205100 | 0.37934100  |
| H | 1.94479000  | -1.32863200 | -1.24368100 |
| H | 1.89879500  | -2.27252500 | 0.26230400  |
| H | 0.10766800  | 1.32794000  | 1.10036500  |
| H | 0.07356800  | 2.20666700  | -0.43379200 |
| H | 0.02449000  | 0.08929300  | -1.70120400 |
| H | 2.29121100  | 1.29971400  | -1.05623400 |
| O | 0.25742000  | -1.13802700 | -0.04788800 |

39

G (A.U.) = -709.131033

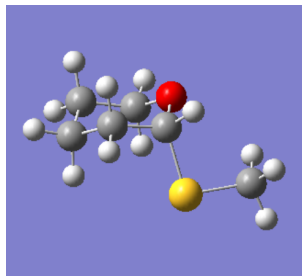

XYZ coordinates

0 1

|   |             |             |             |
|---|-------------|-------------|-------------|
| S | 1.49803500  | -0.63384500 | -0.54131400 |
| C | -1.87505500 | -0.92275800 | -0.47163300 |
| H | -1.37701700 | -1.10968900 | -1.43174100 |
| H | -2.75973100 | -1.56998000 | -0.44136600 |
| C | -2.27895000 | 0.55639800  | -0.38101100 |
| H | -2.87501500 | 0.85646600  | -1.25227000 |
| H | -2.89908200 | 0.71915600  | 0.51080900  |
| C | -1.03225200 | 1.43528000  | -0.28791900 |
| H | -1.28802200 | 2.48216000  | -0.10078900 |
| H | -0.45625600 | 1.37962500  | -1.22245800 |
| C | -0.92818900 | -1.27576200 | 0.68555900  |
| H | -0.54466500 | -2.29782400 | 0.59360500  |
| H | -1.48191200 | -1.21948100 | 1.63244400  |
| C | 0.24121600  | -0.28643300 | 0.79464200  |
| H | 0.76429000  | -0.41735600 | 1.74633400  |
| O | -0.19542000 | 1.05667800  | 0.81253300  |
| C | 2.77406800  | 0.56720700  | -0.02020200 |
| H | 3.52802200  | 0.60778200  | -0.81013900 |
| H | 2.32636700  | 1.55559100  | 0.10545800  |
| H | 3.25278800  | 0.25805700  | 0.91424900  |

---

## 12. NMR Spectra

---

CDCl<sub>3</sub>, 400 MHz

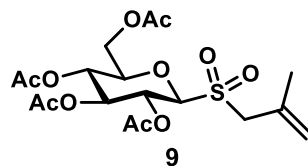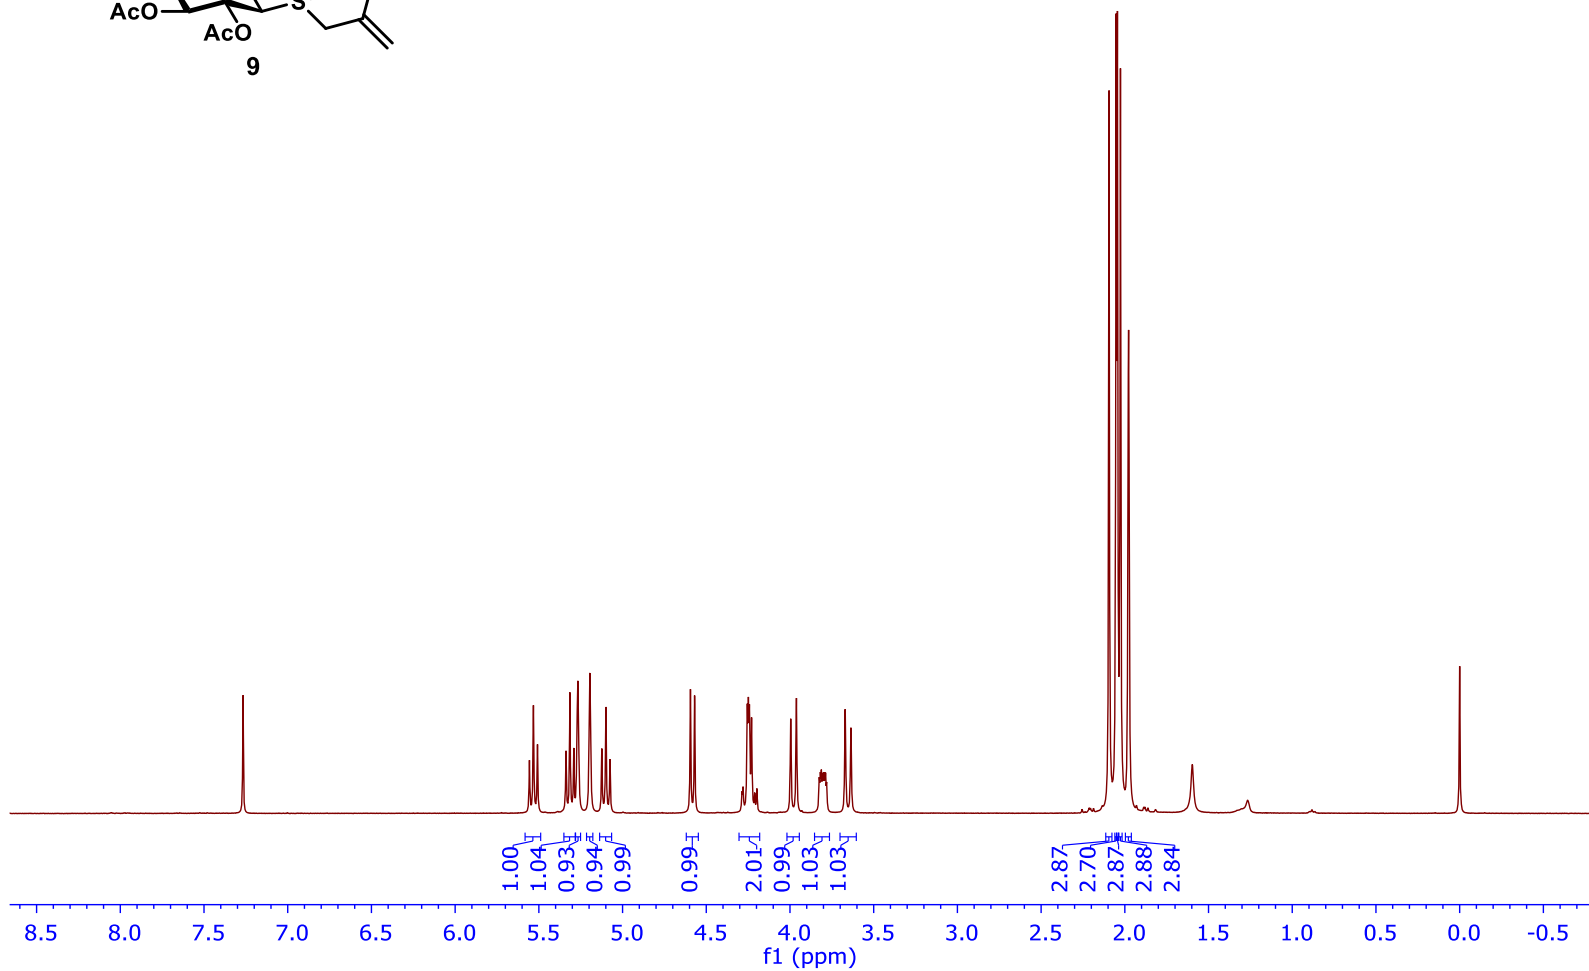

CDCl<sub>3</sub>, 101 MHz

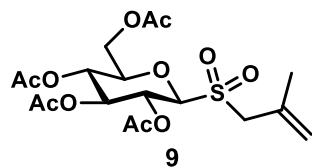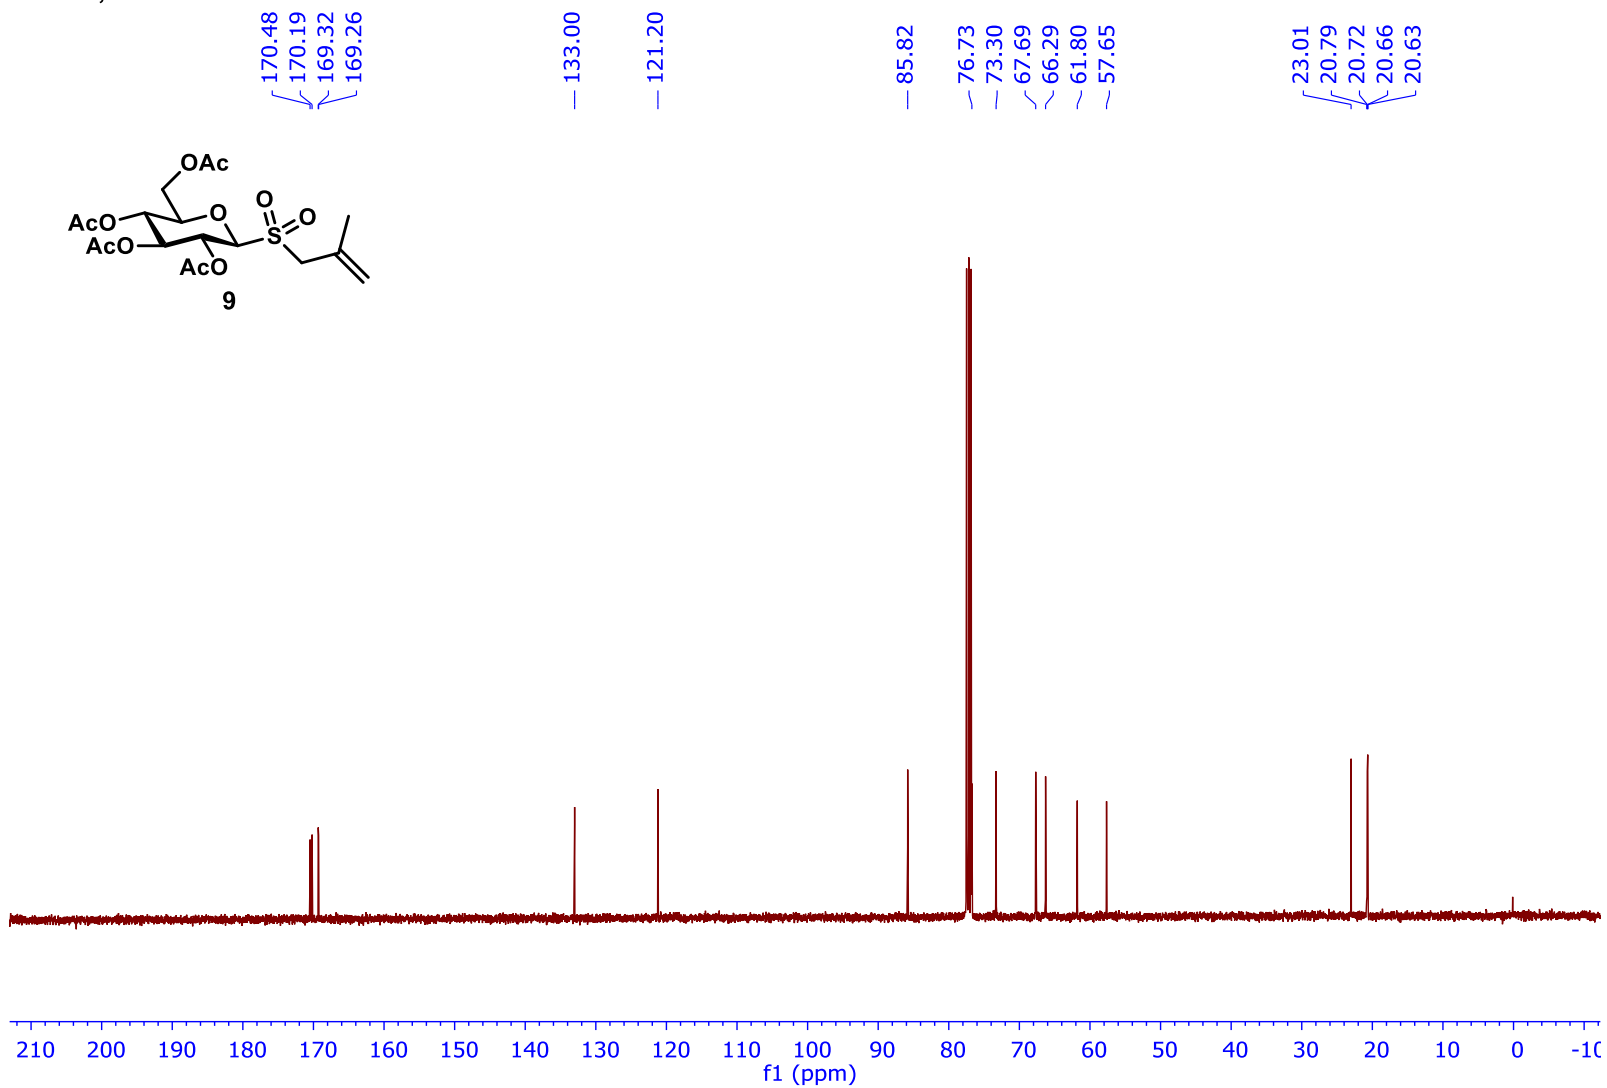

CD3OD, 400 MHz

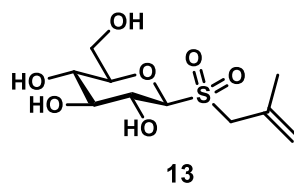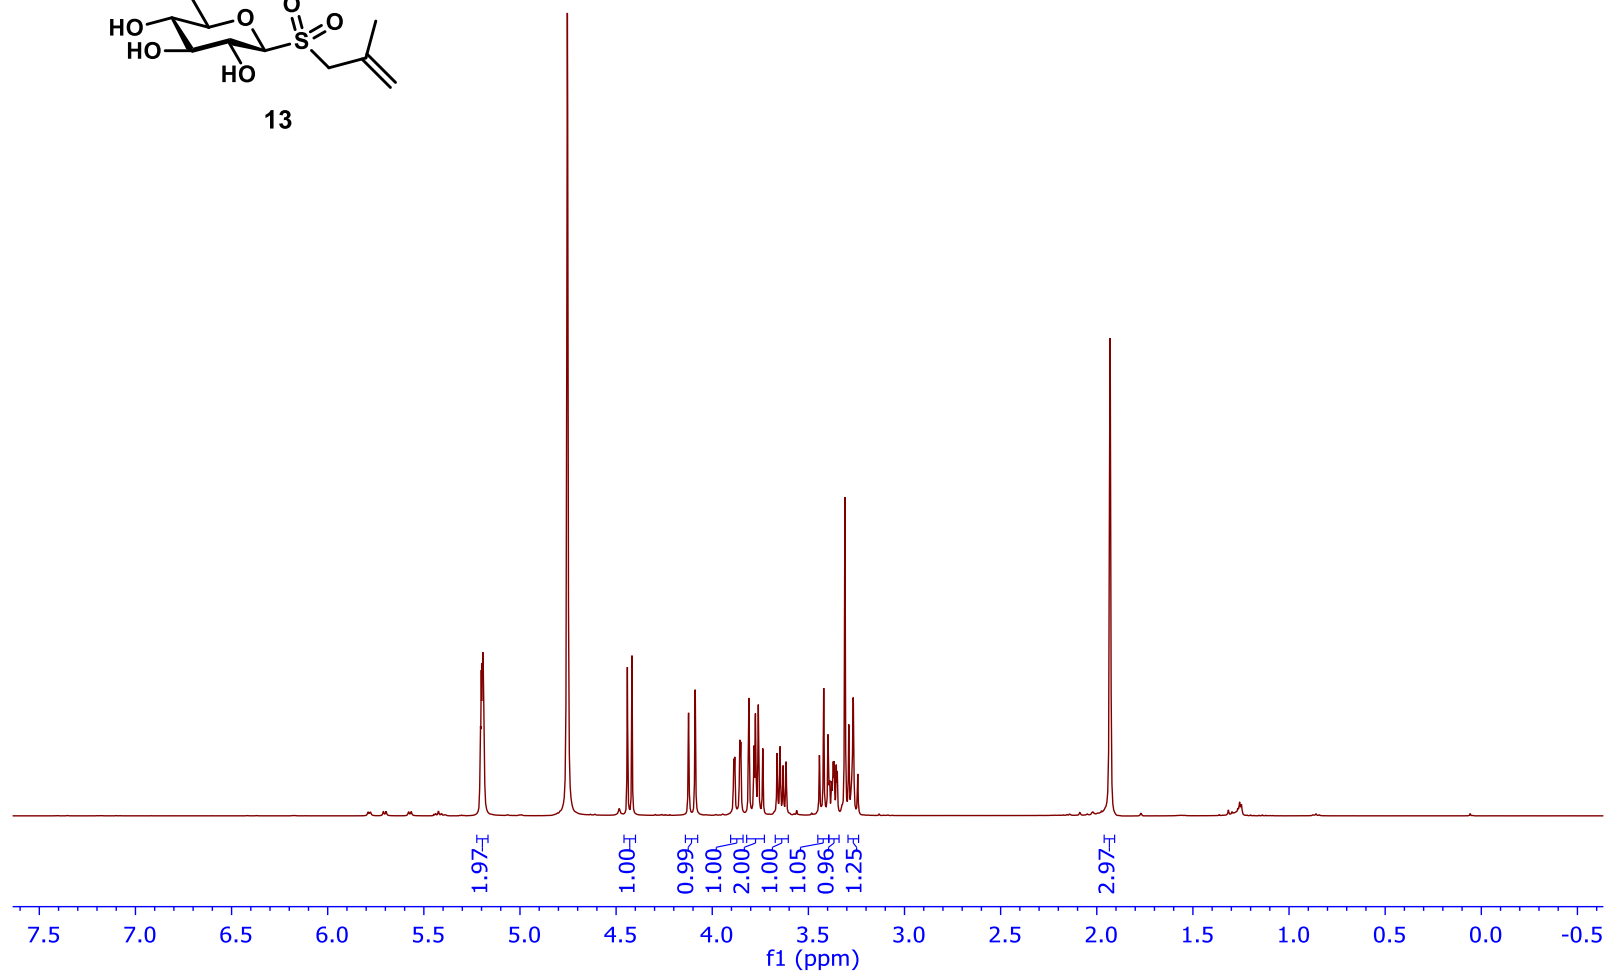

CD3OD, 101 MHz

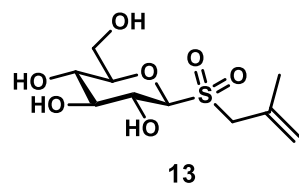

— 135.09

— 121.86

~ 90.11

~ 83.33

~ 79.52

~ 71.15

~ 70.96

~ 63.12

~ 59.73

— 23.83

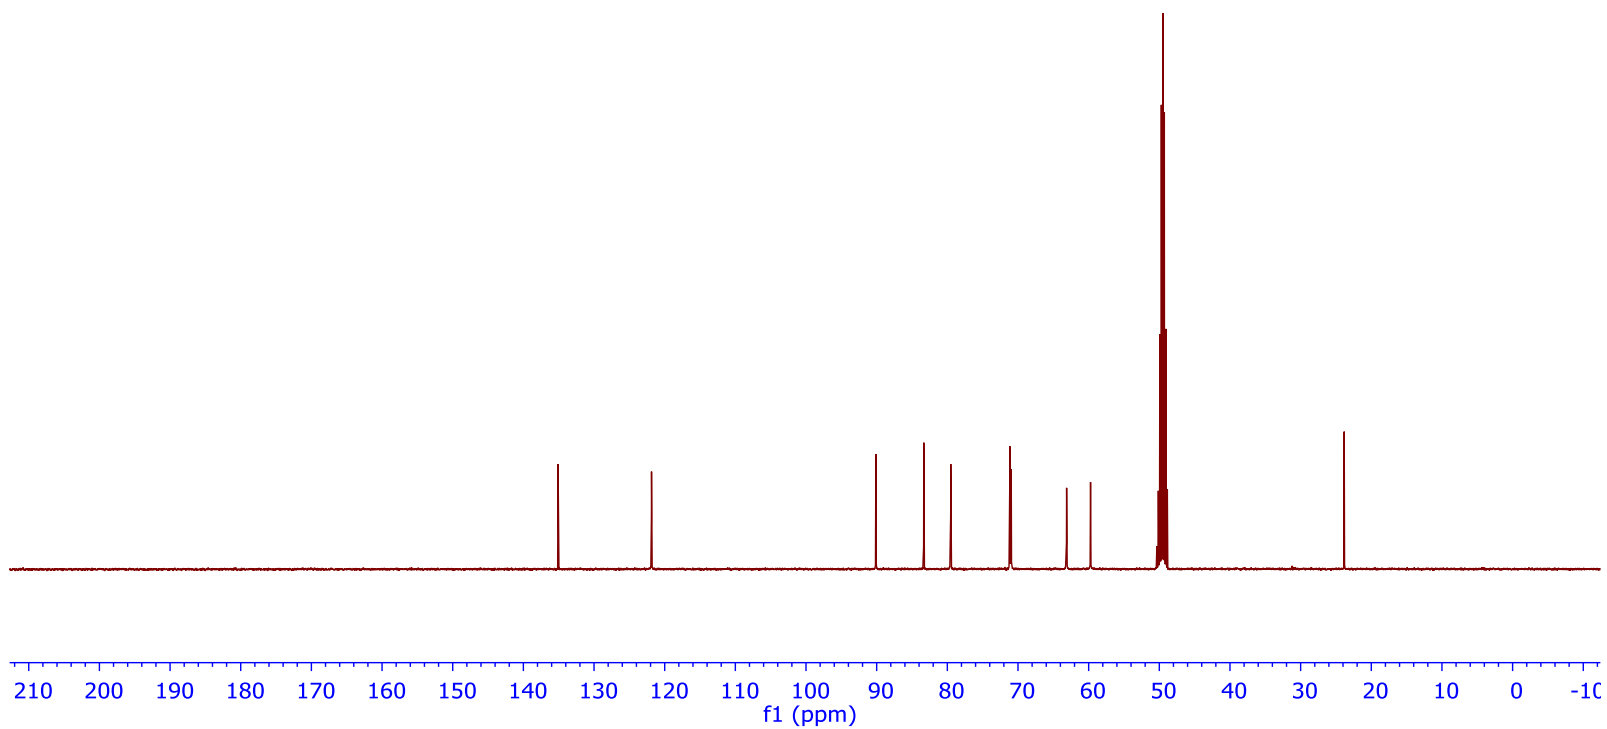

CDCl<sub>3</sub>, 400 MHz

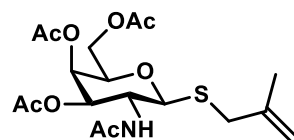

SI-8

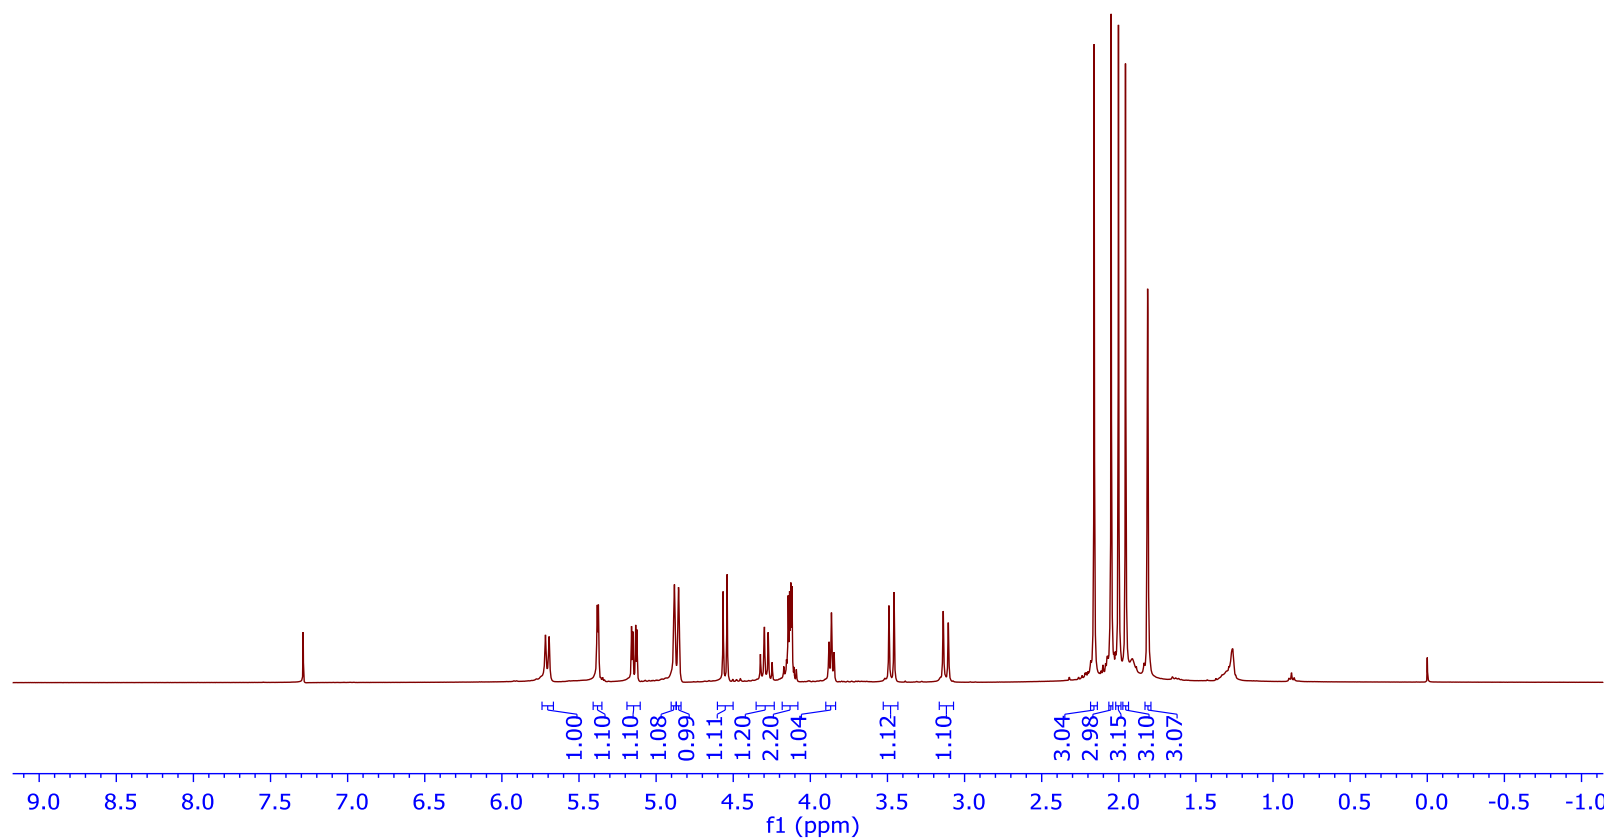

CDCl<sub>3</sub>, 101 MHz

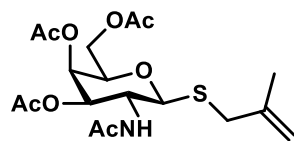

SI-8

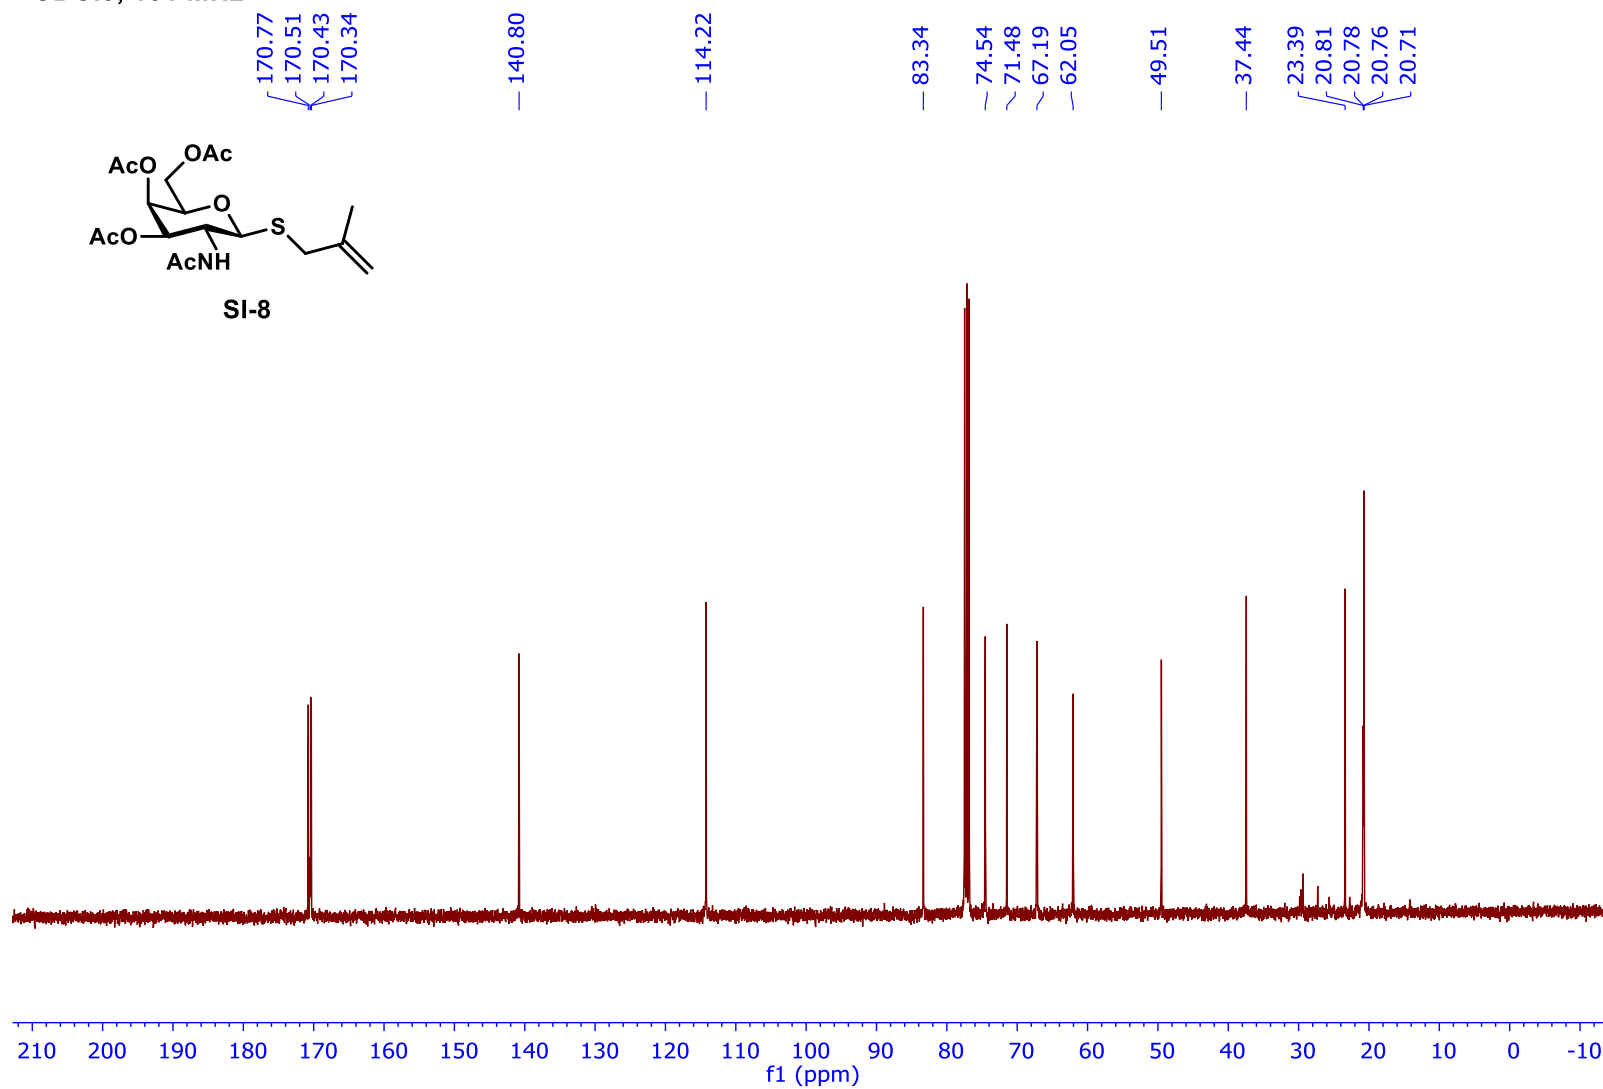

CDCl<sub>3</sub>, 400 MHz

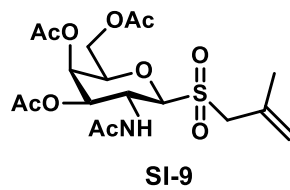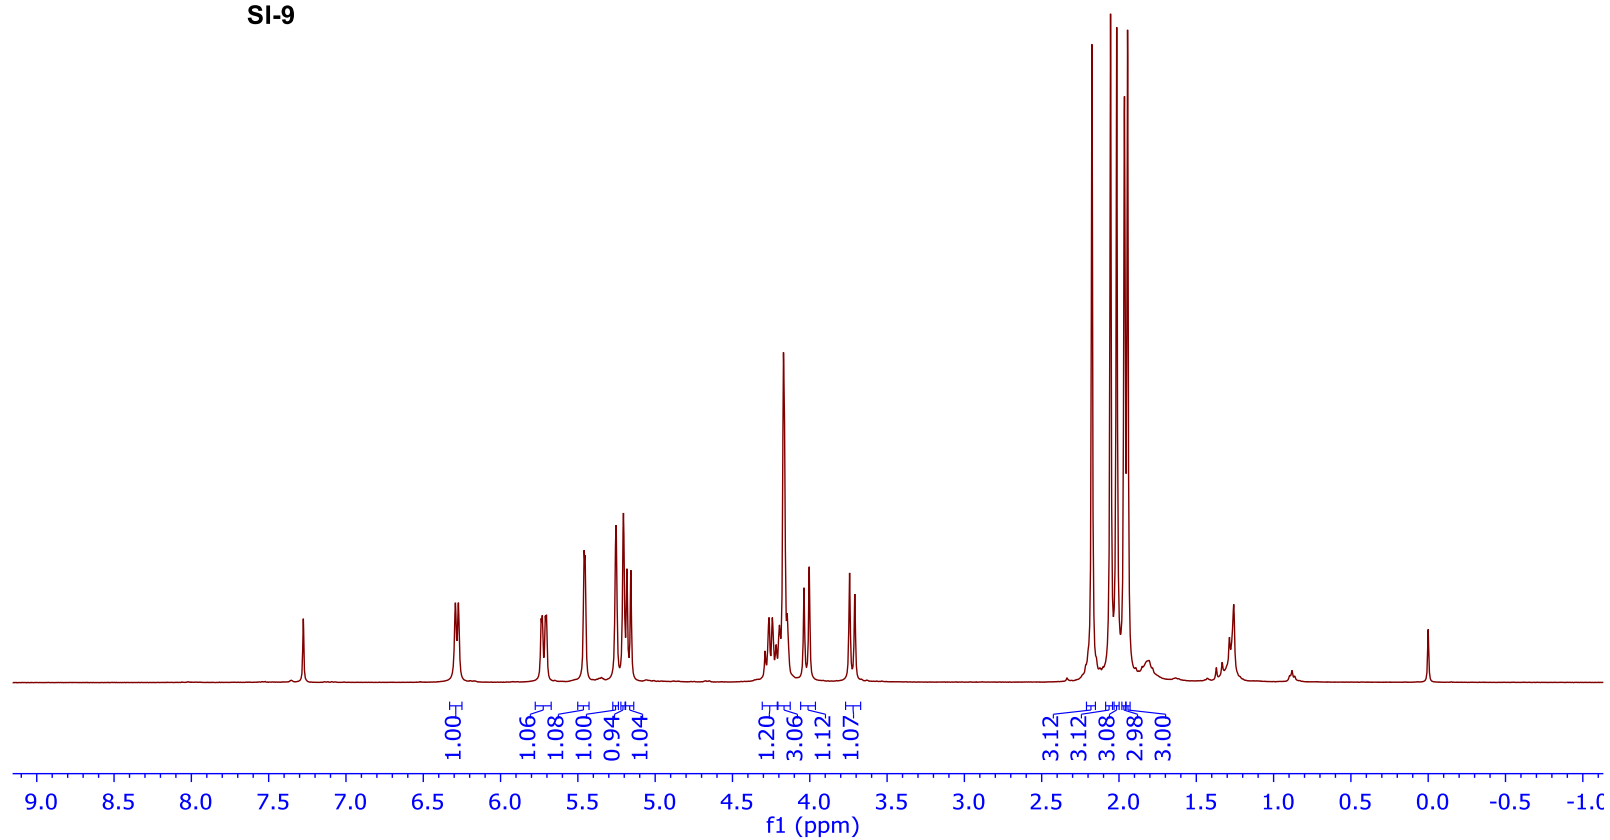

CDCl<sub>3</sub>, 101 MHz

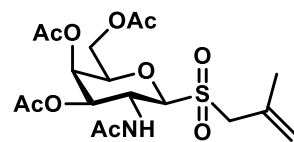

SI-9

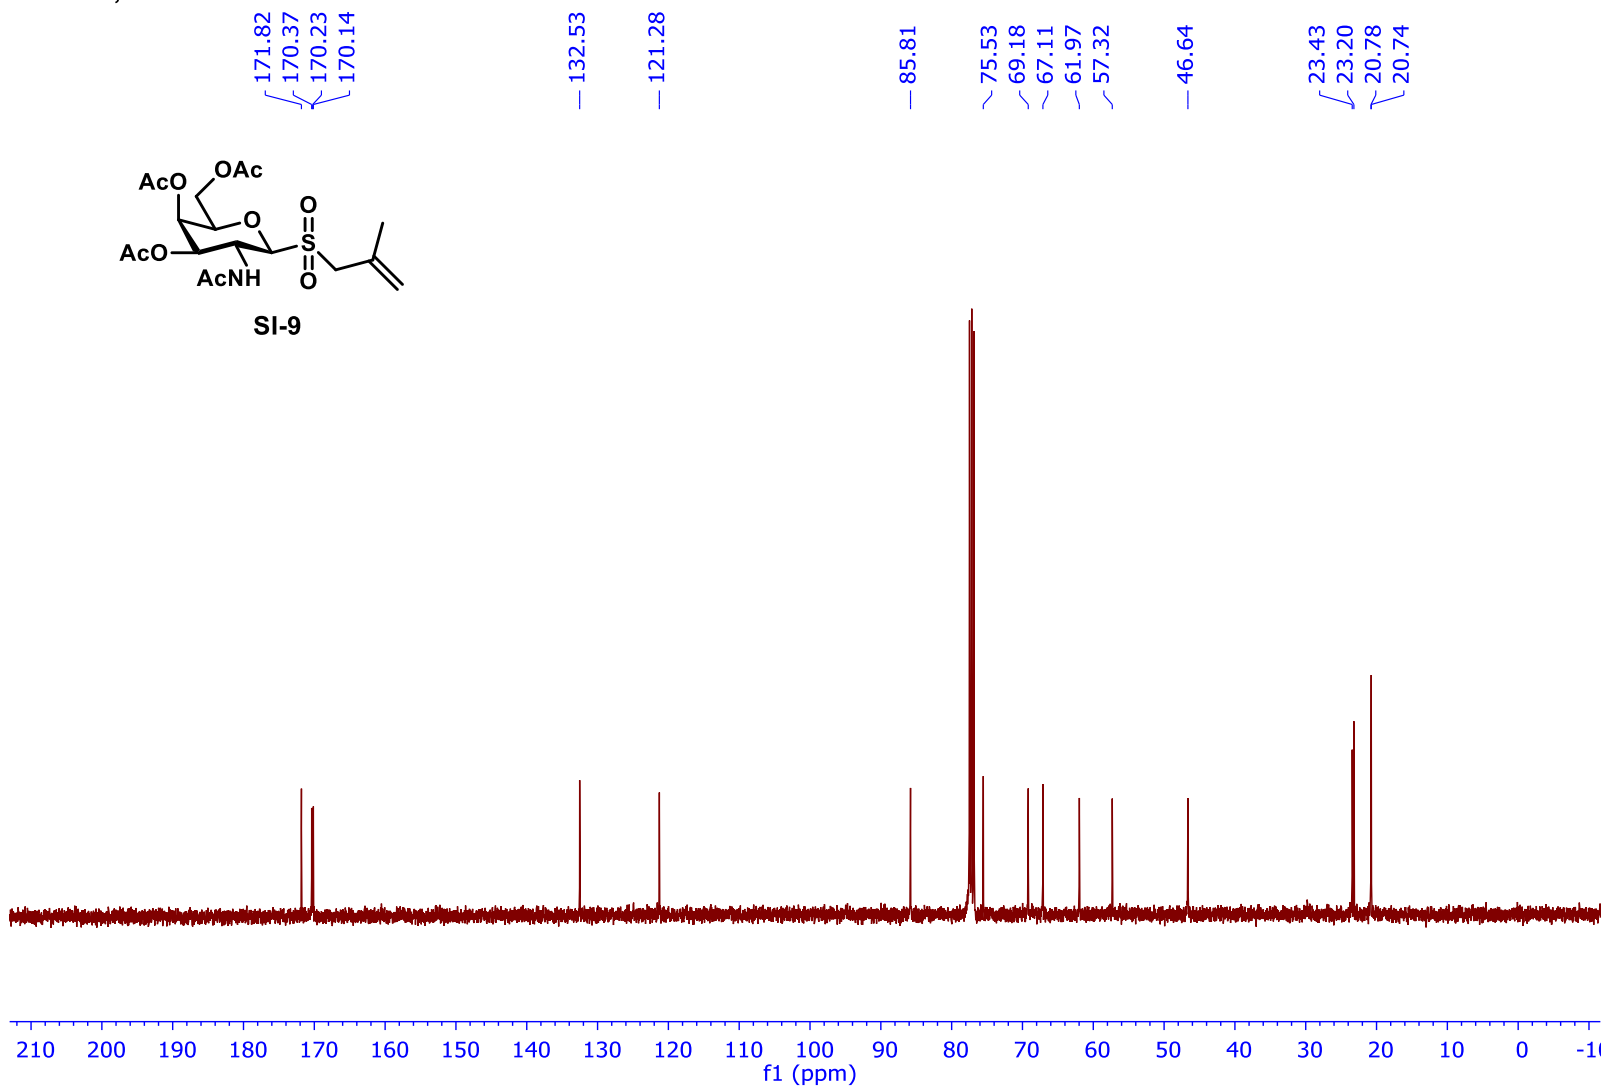

D<sub>2</sub>O, 400 MHz

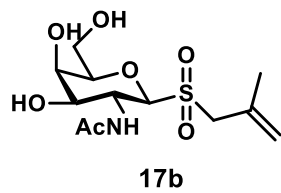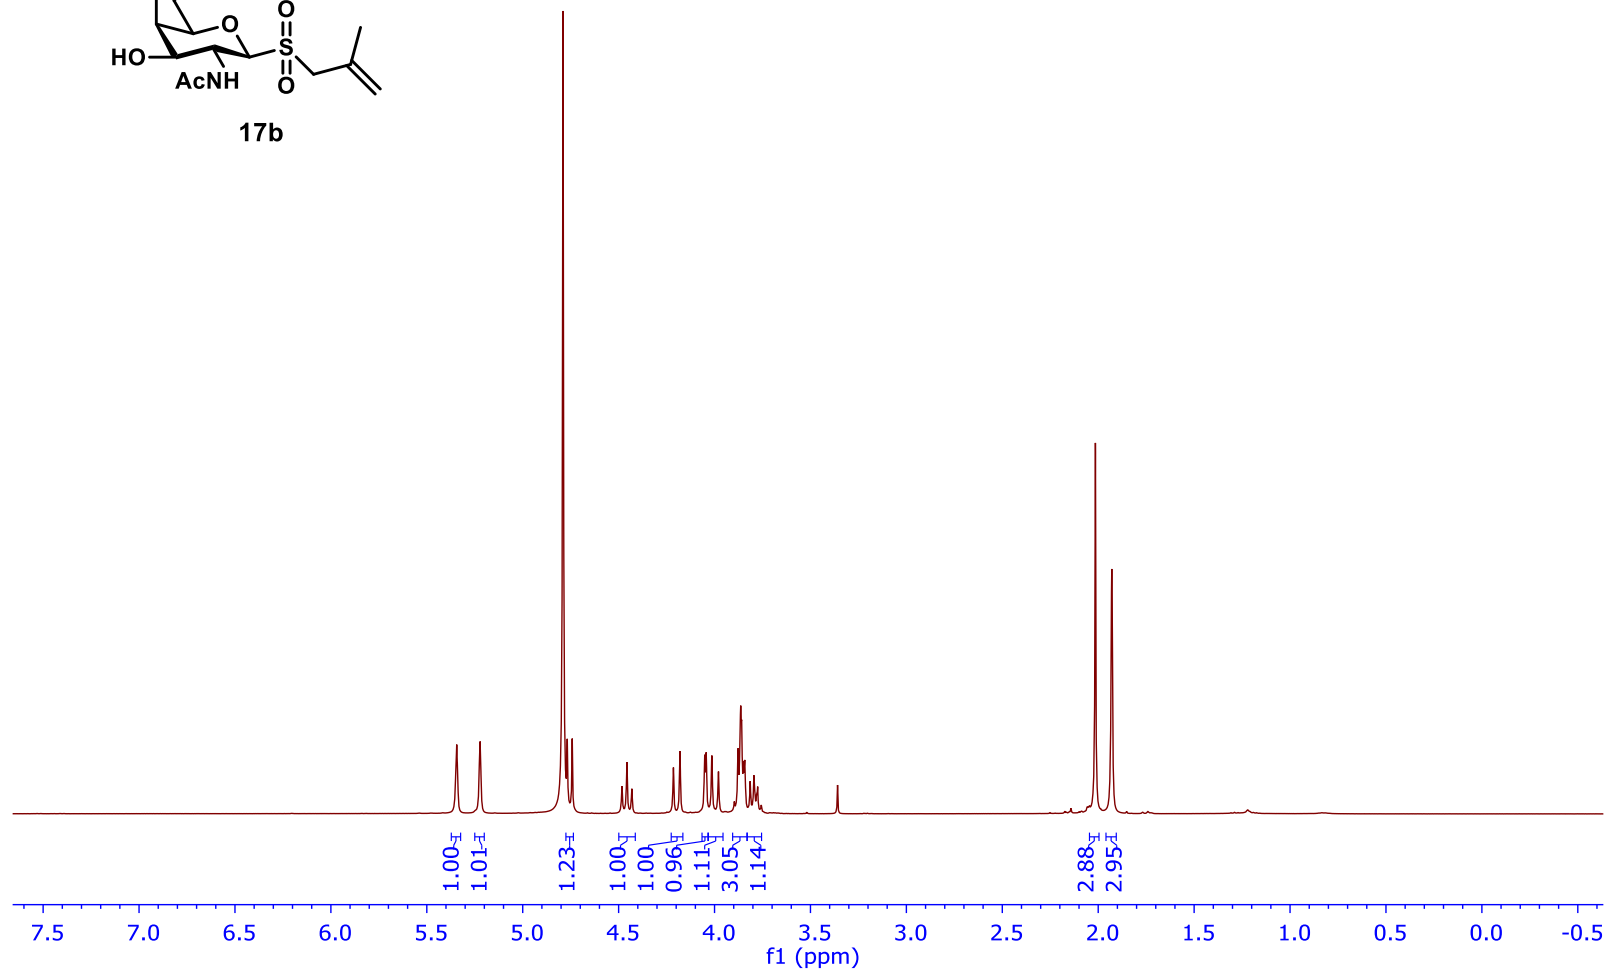

D<sub>2</sub>O, 101 MHz

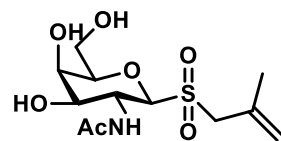

17b

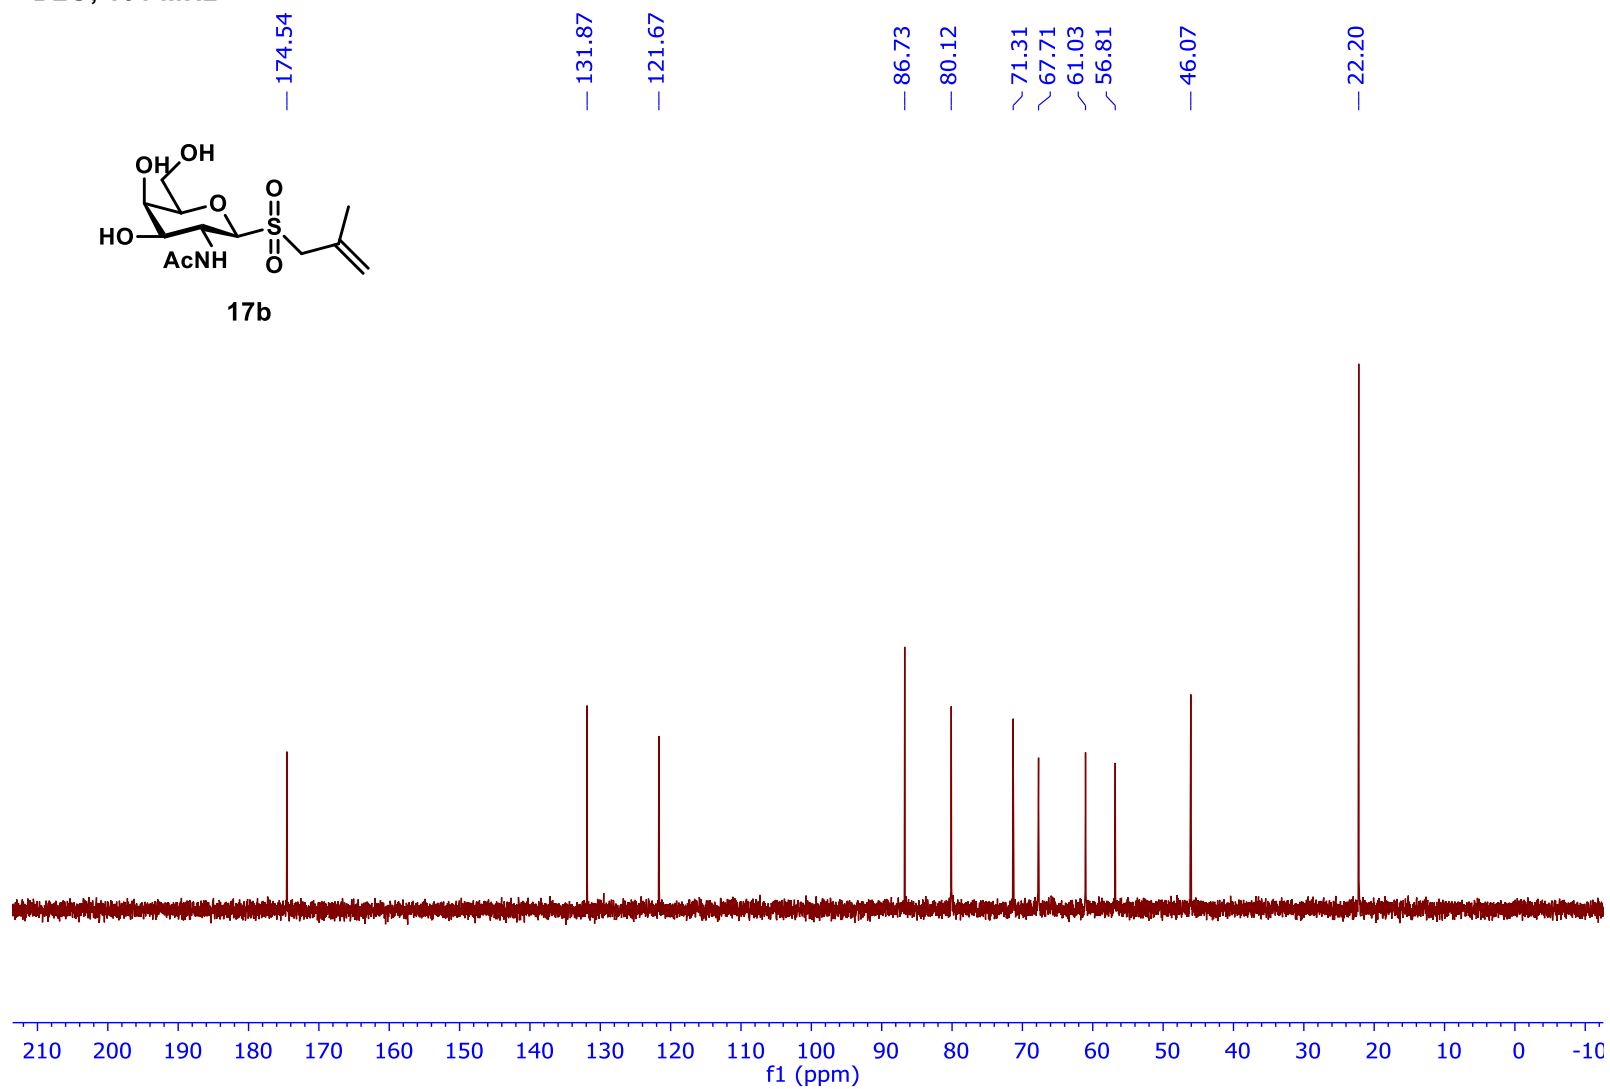

CDCl<sub>3</sub>, 400 MHz

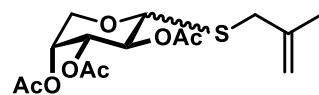

SI-10

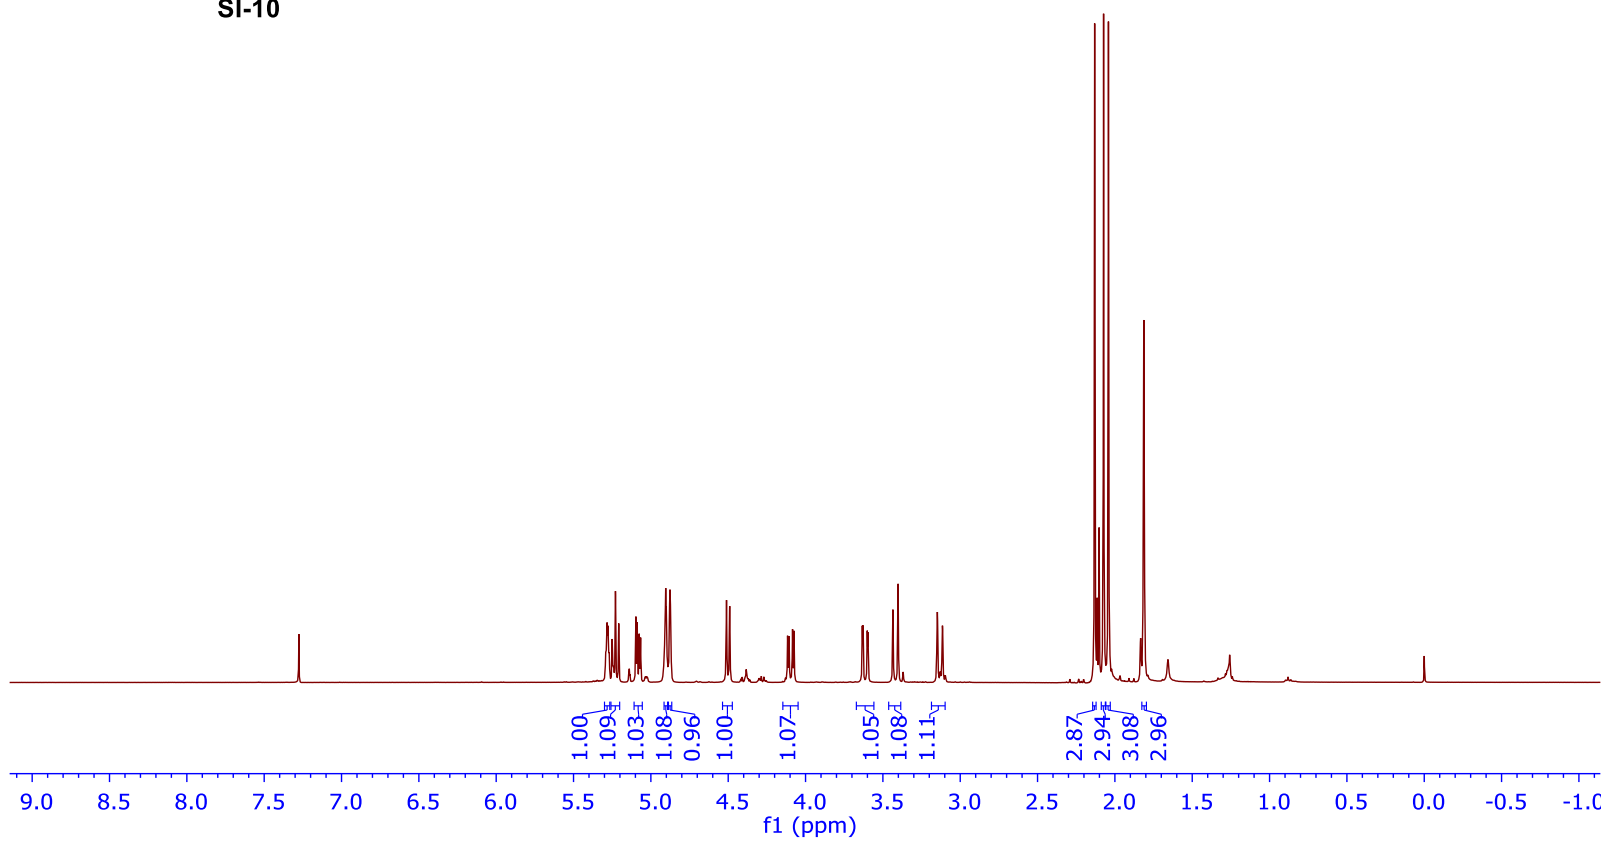

CDCl<sub>3</sub>, 101 MHz

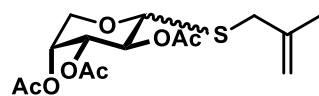

SI-10

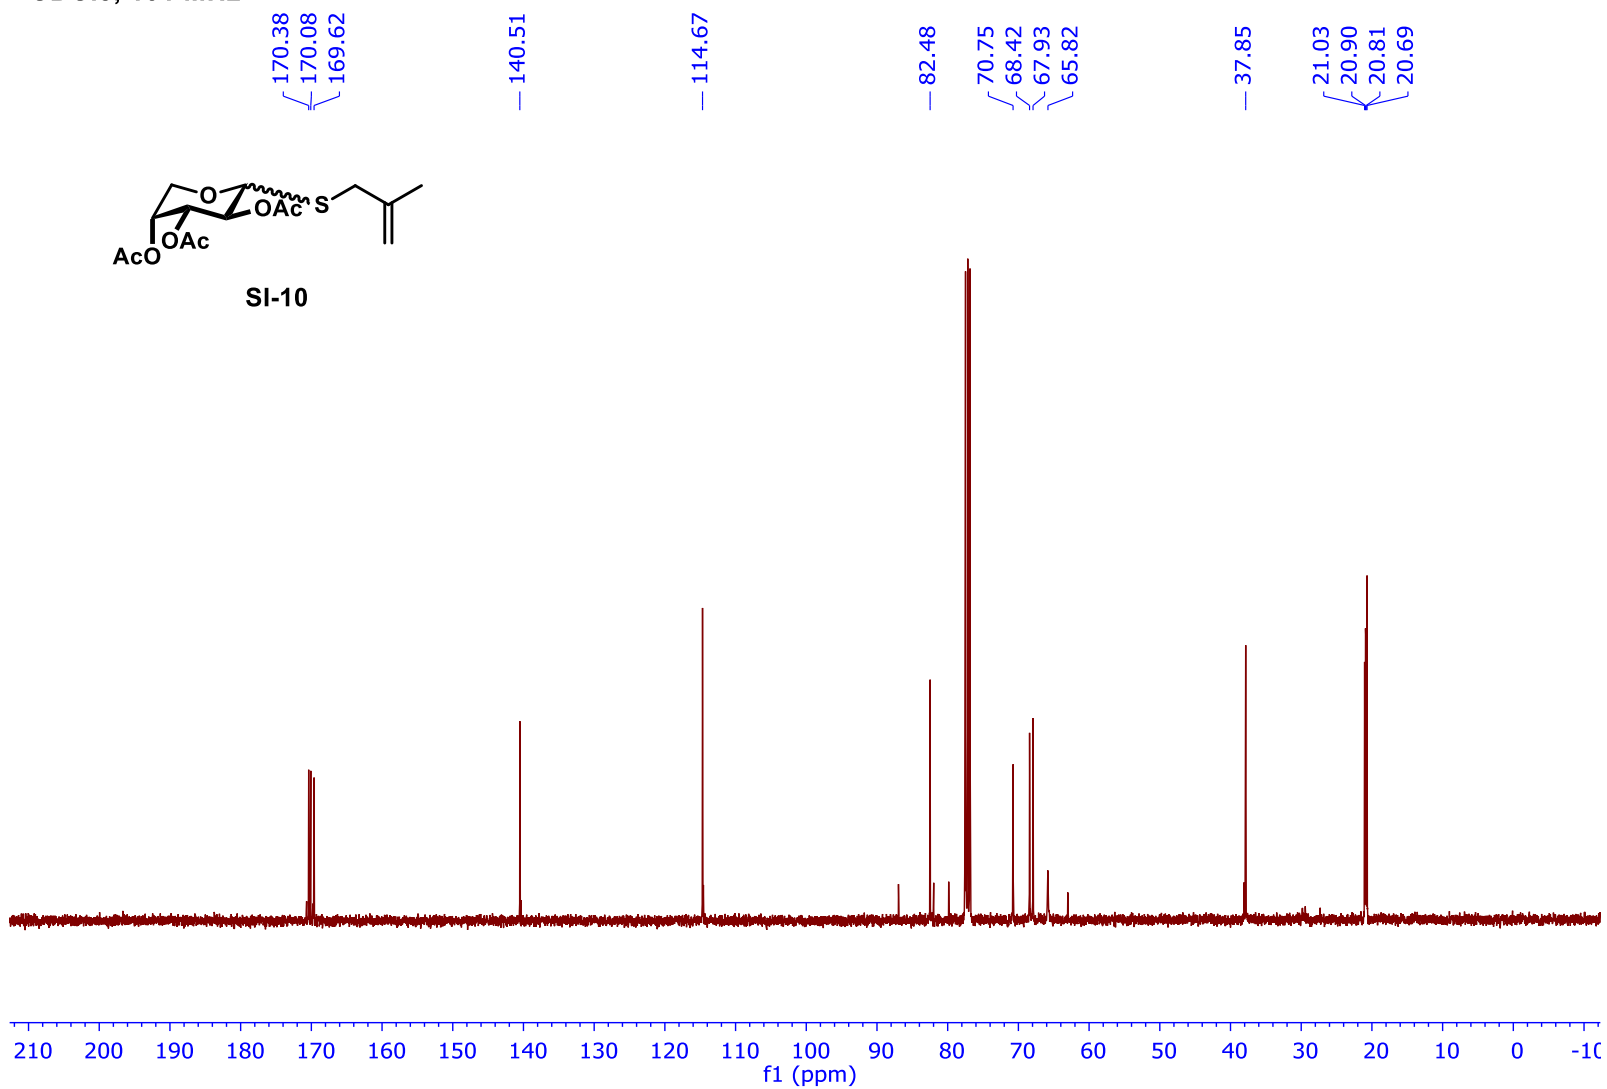

CDCl<sub>3</sub>, 400 MHz

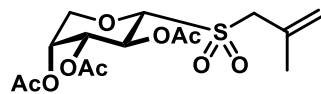

SI-11

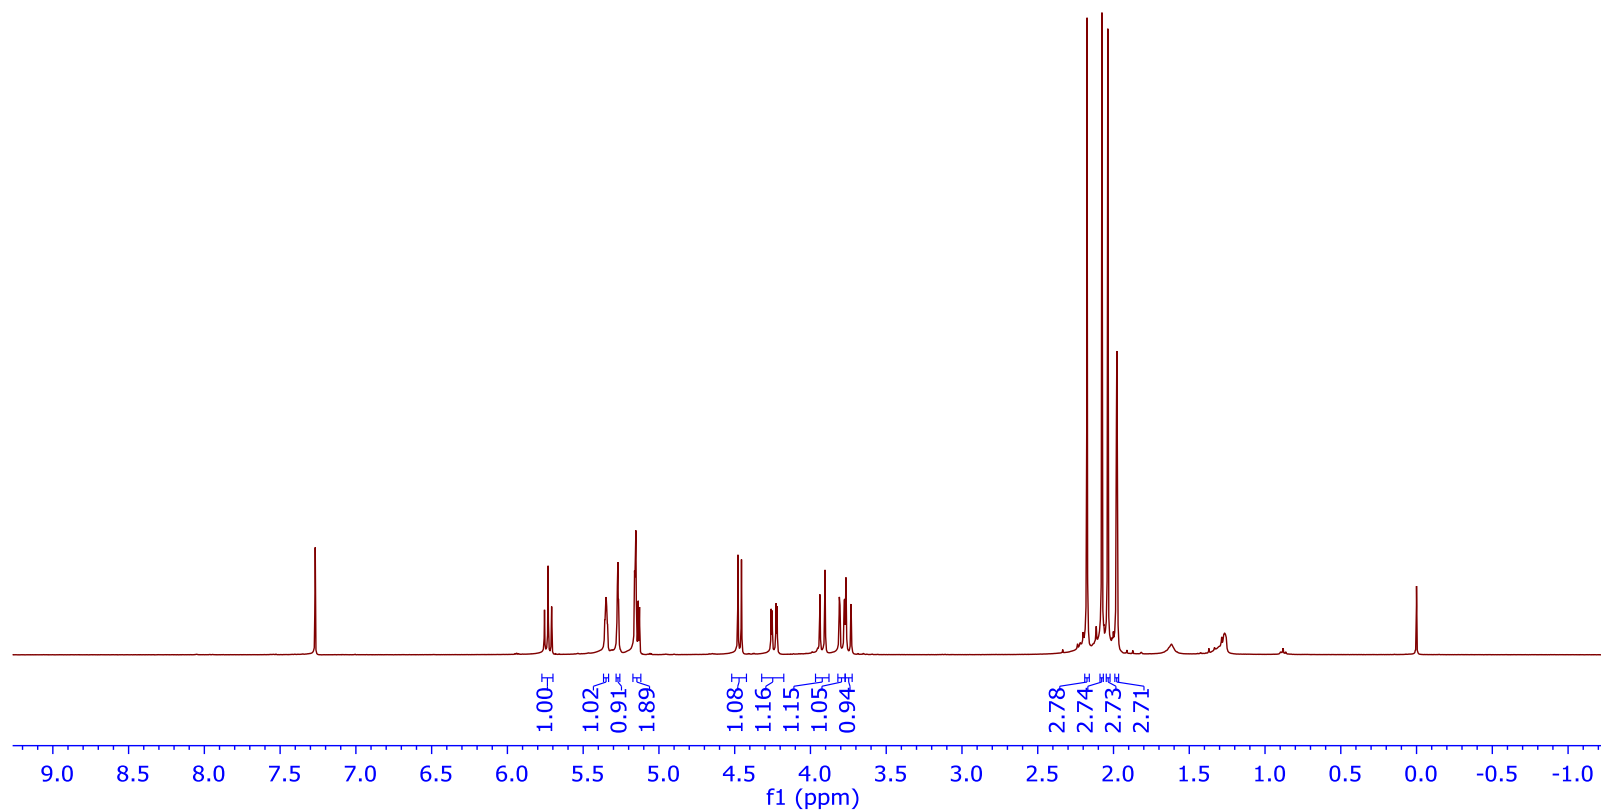

CDCl<sub>3</sub>, 101 MHz

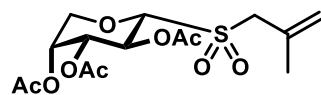

SI-11

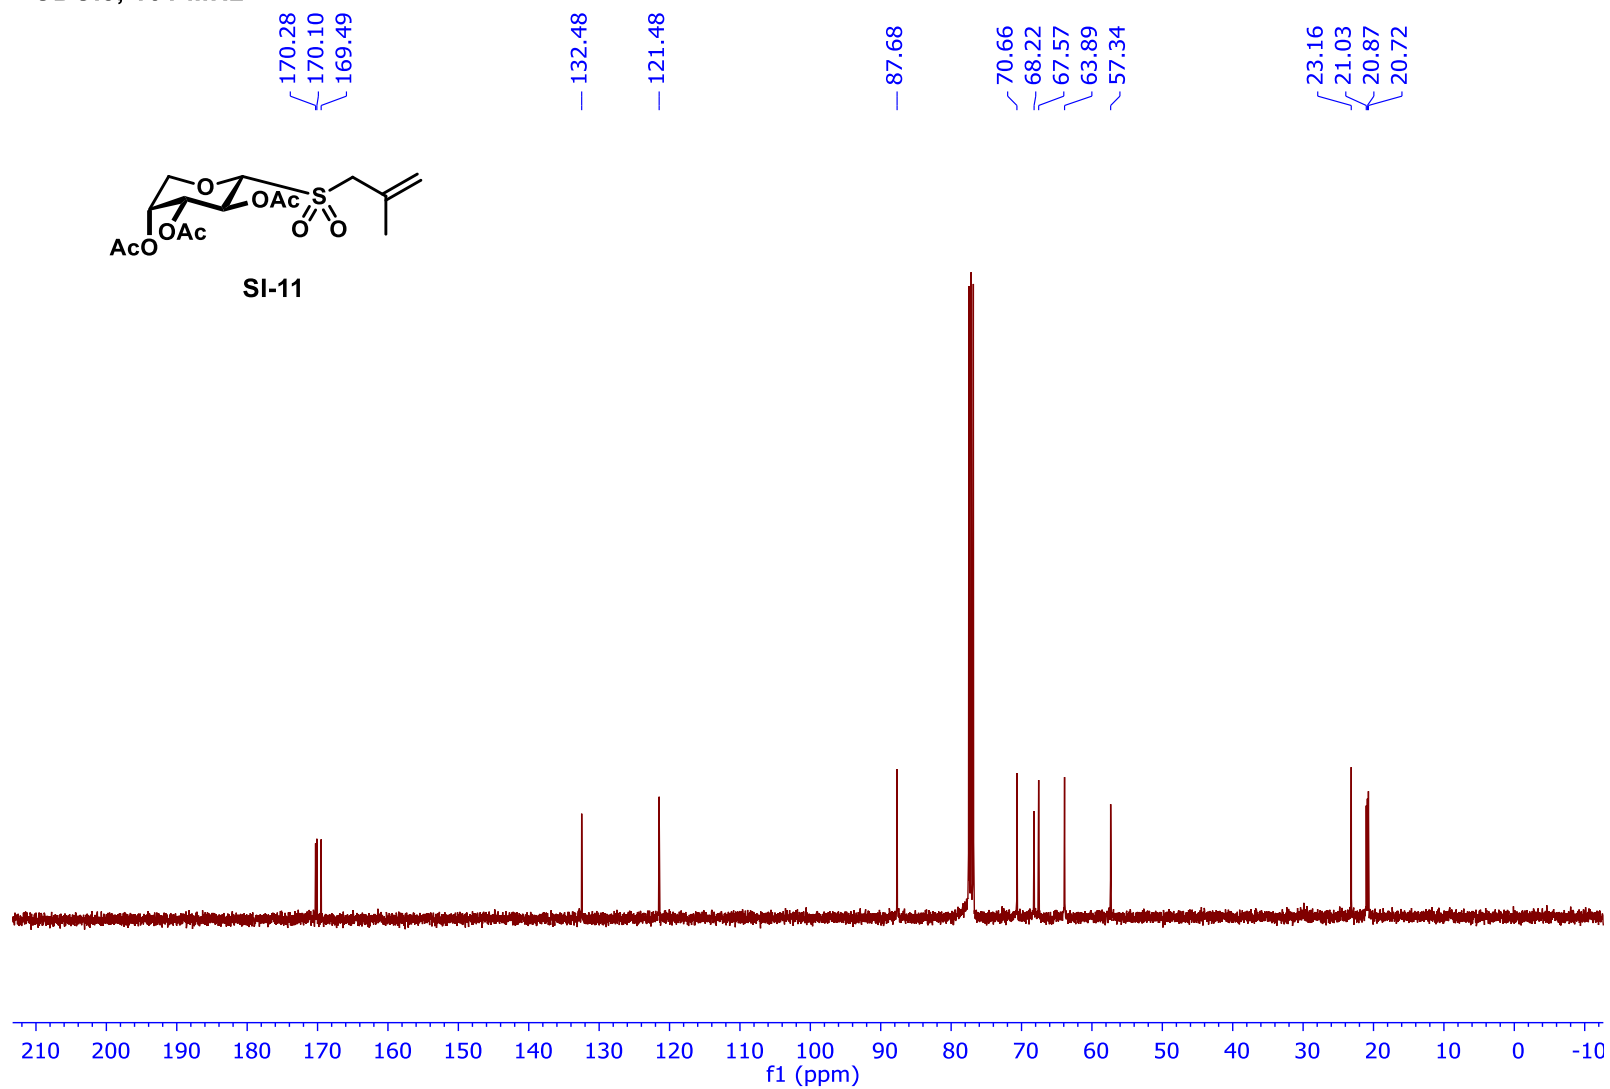

D<sub>2</sub>O, 400 MHz

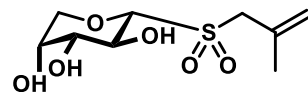

17c

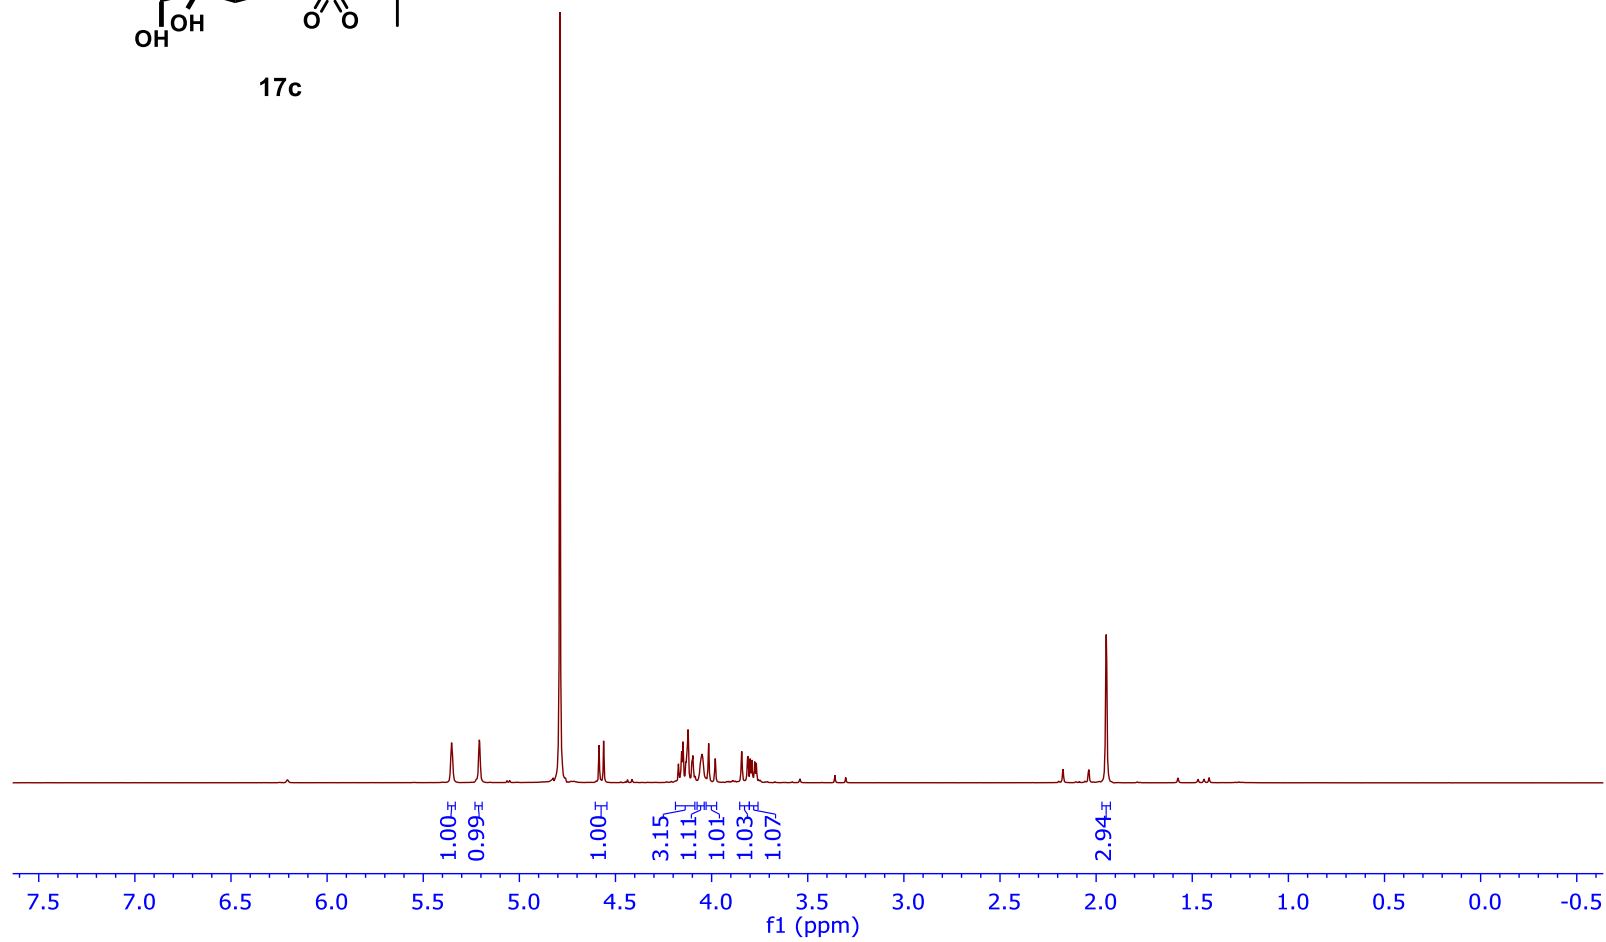

D<sub>2</sub>O, 101 MHz

— 131.91

— 121.65

— 89.33

— 72.91

— 70.87

— 68.12

— 65.62

— 57.95

— 22.24

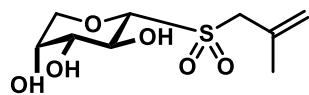

17c

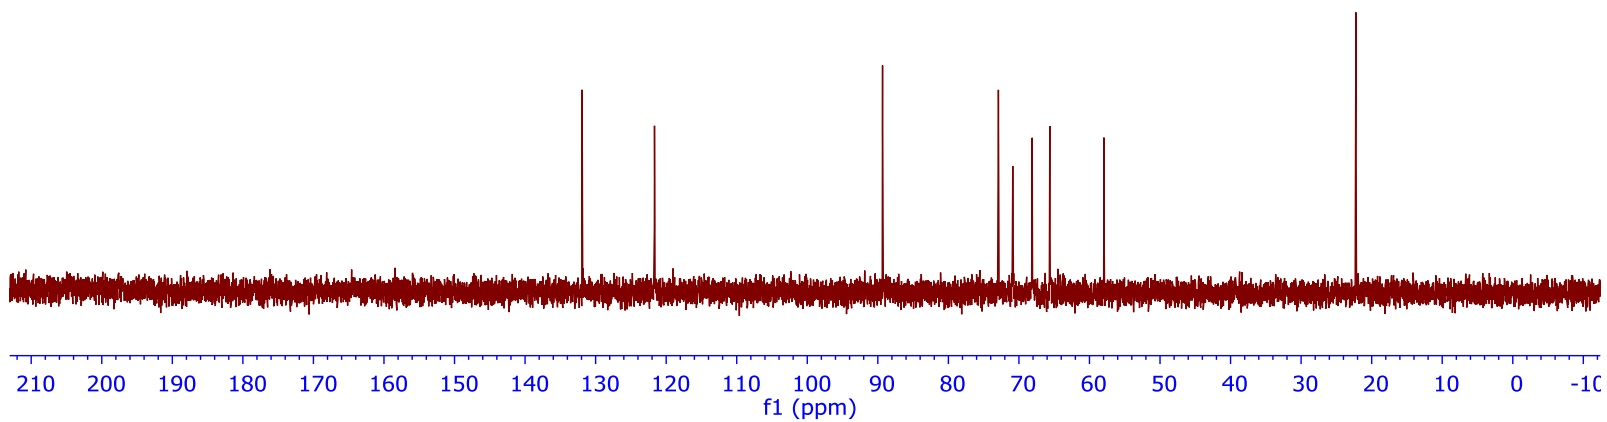

CDCl<sub>3</sub>, 400 MHz

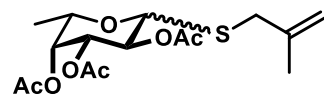

SI-12

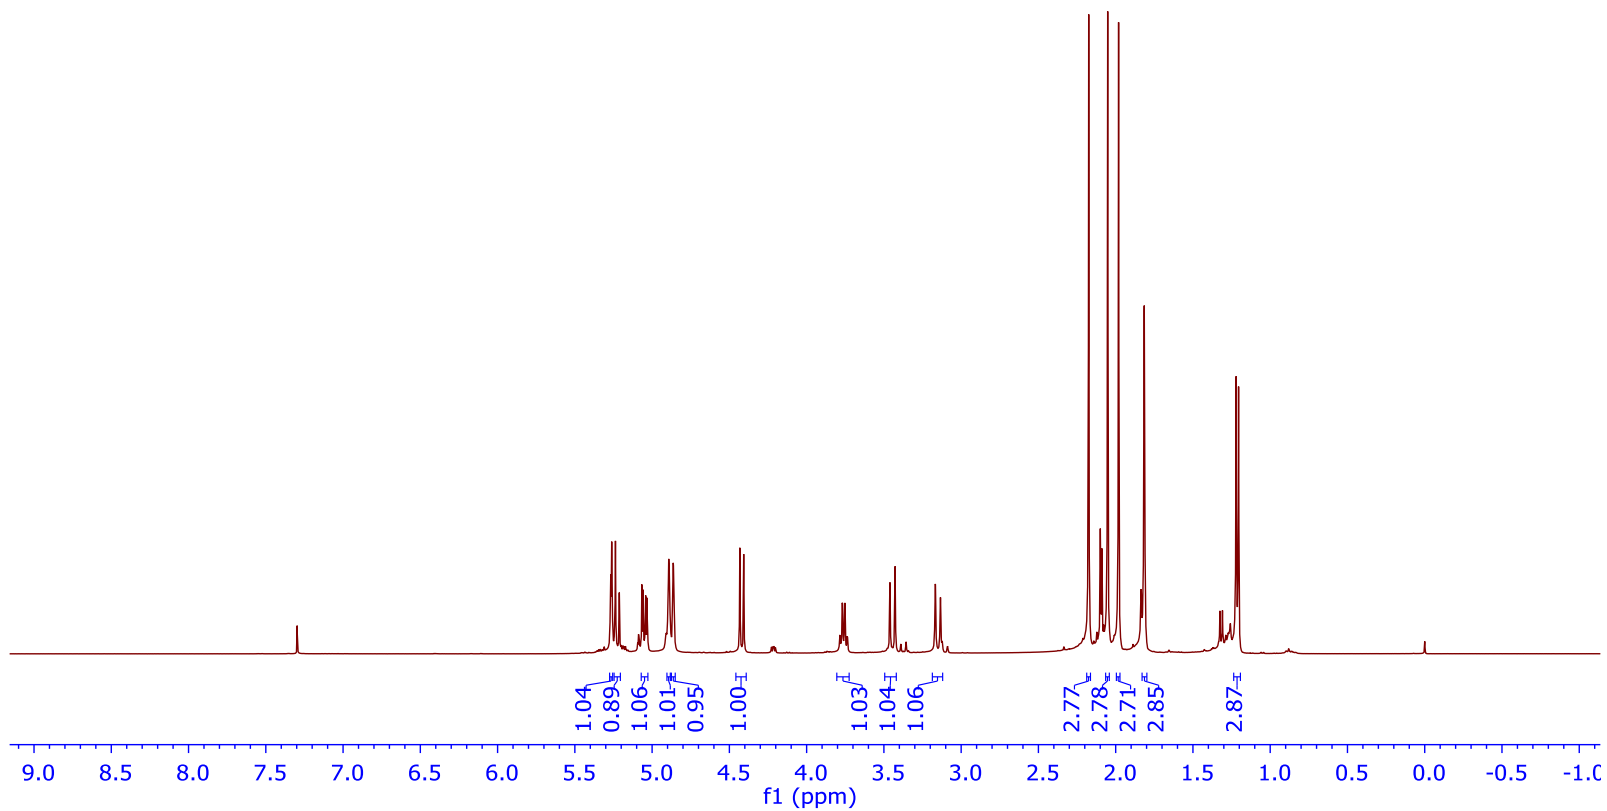

CDCl<sub>3</sub>, 101 MHz

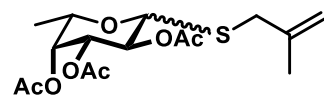

SI-12

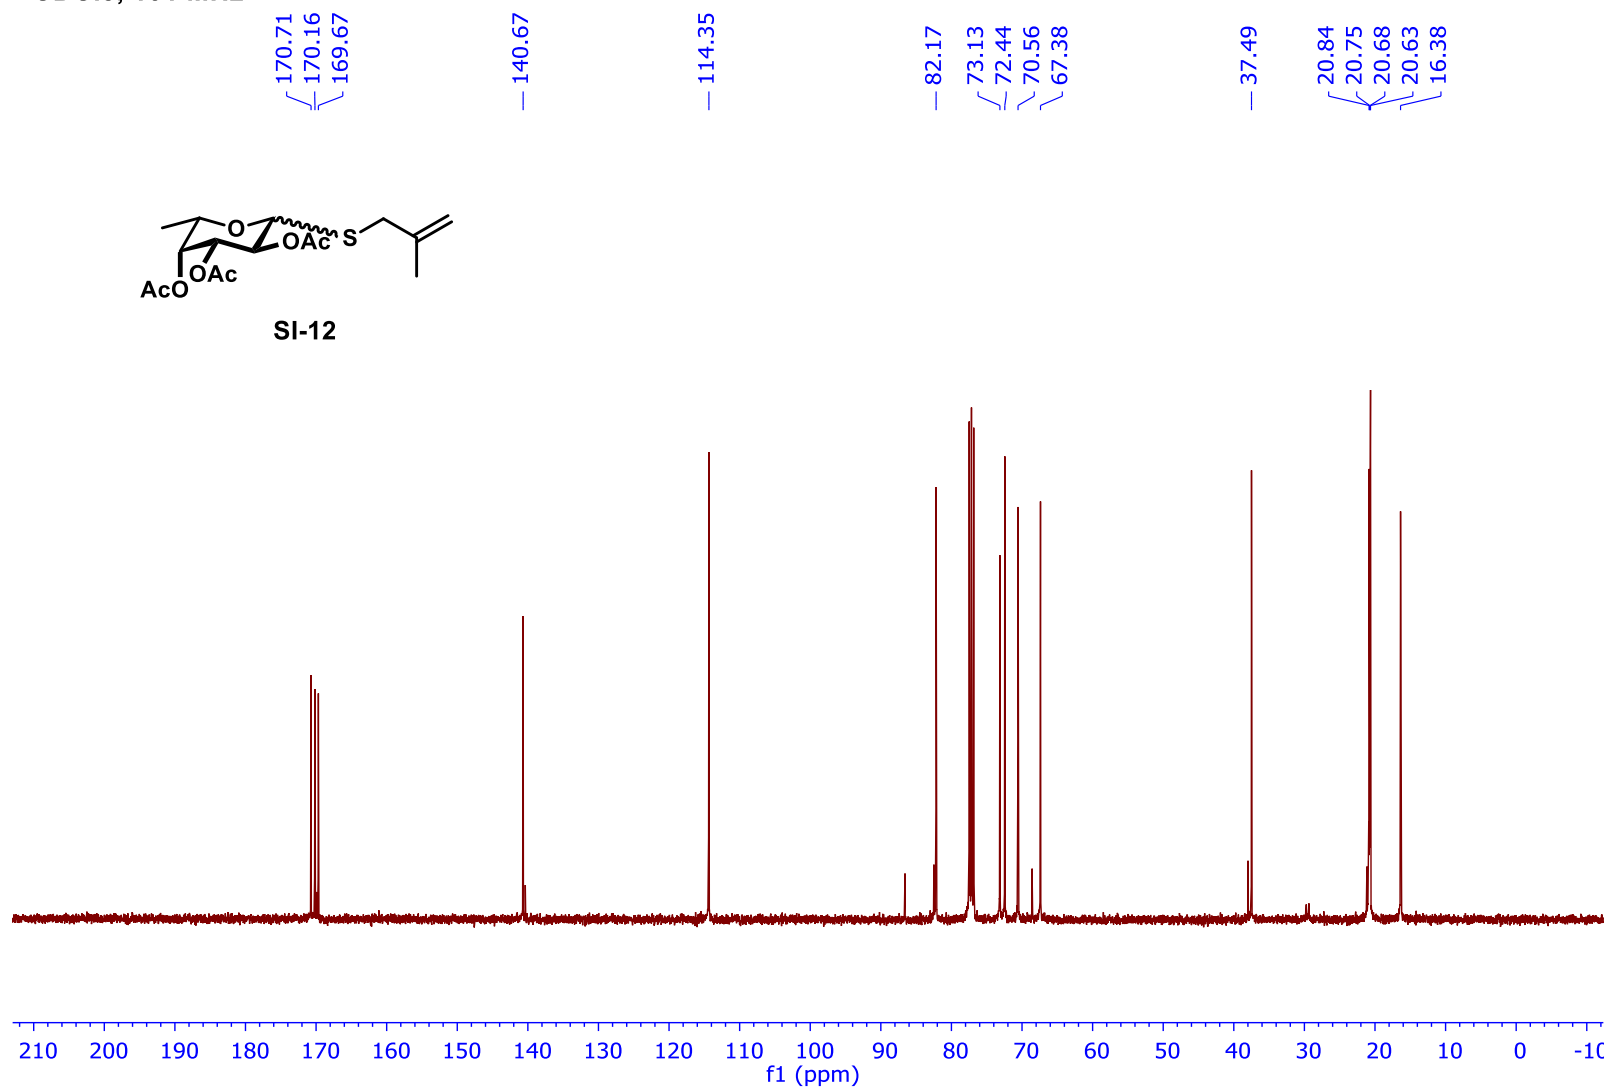

CDCl<sub>3</sub>, 400 MHz

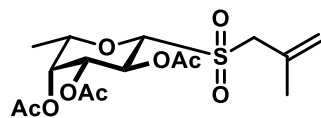

SI-13

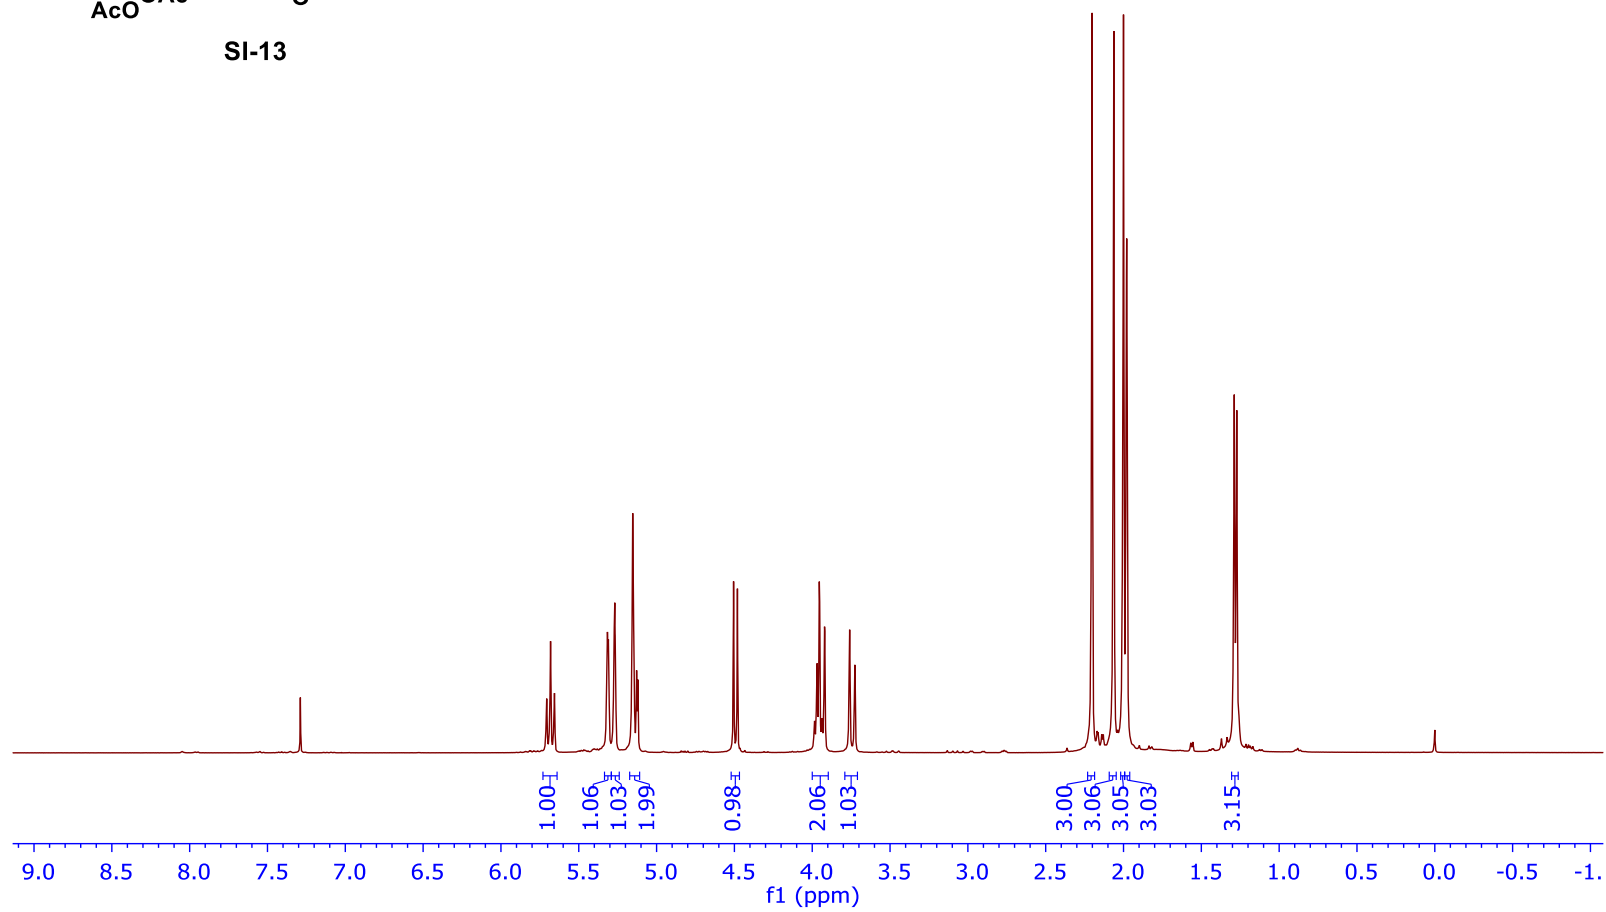

CDCl<sub>3</sub>, 101 MHz

170.45  
170.02  
169.46

132.51

121.21

87.56

74.35  
71.77  
69.82  
63.53  
57.00

23.05  
20.80  
20.69  
20.59  
16.33

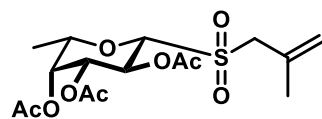

SI-13

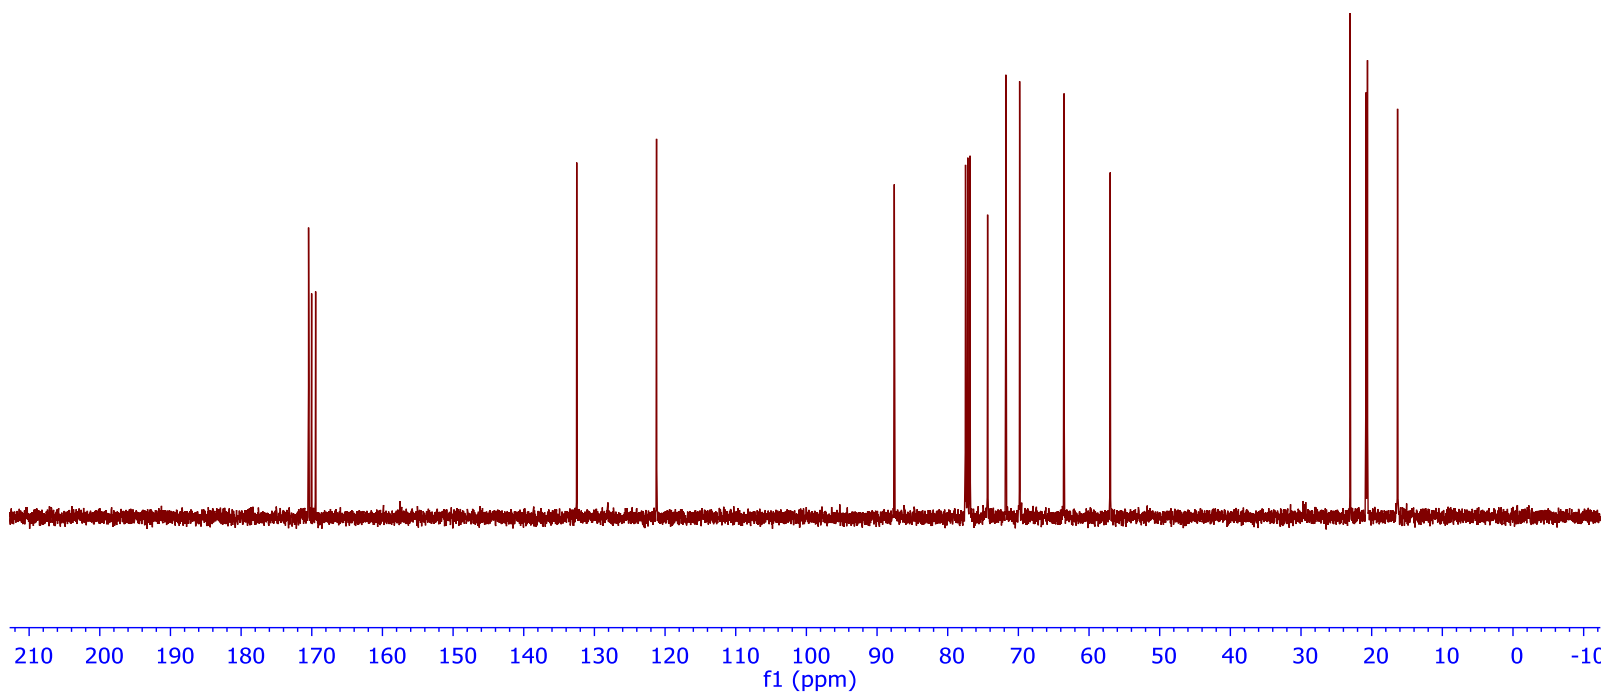

D2O, 400 MHz

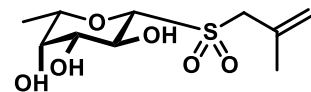

17d

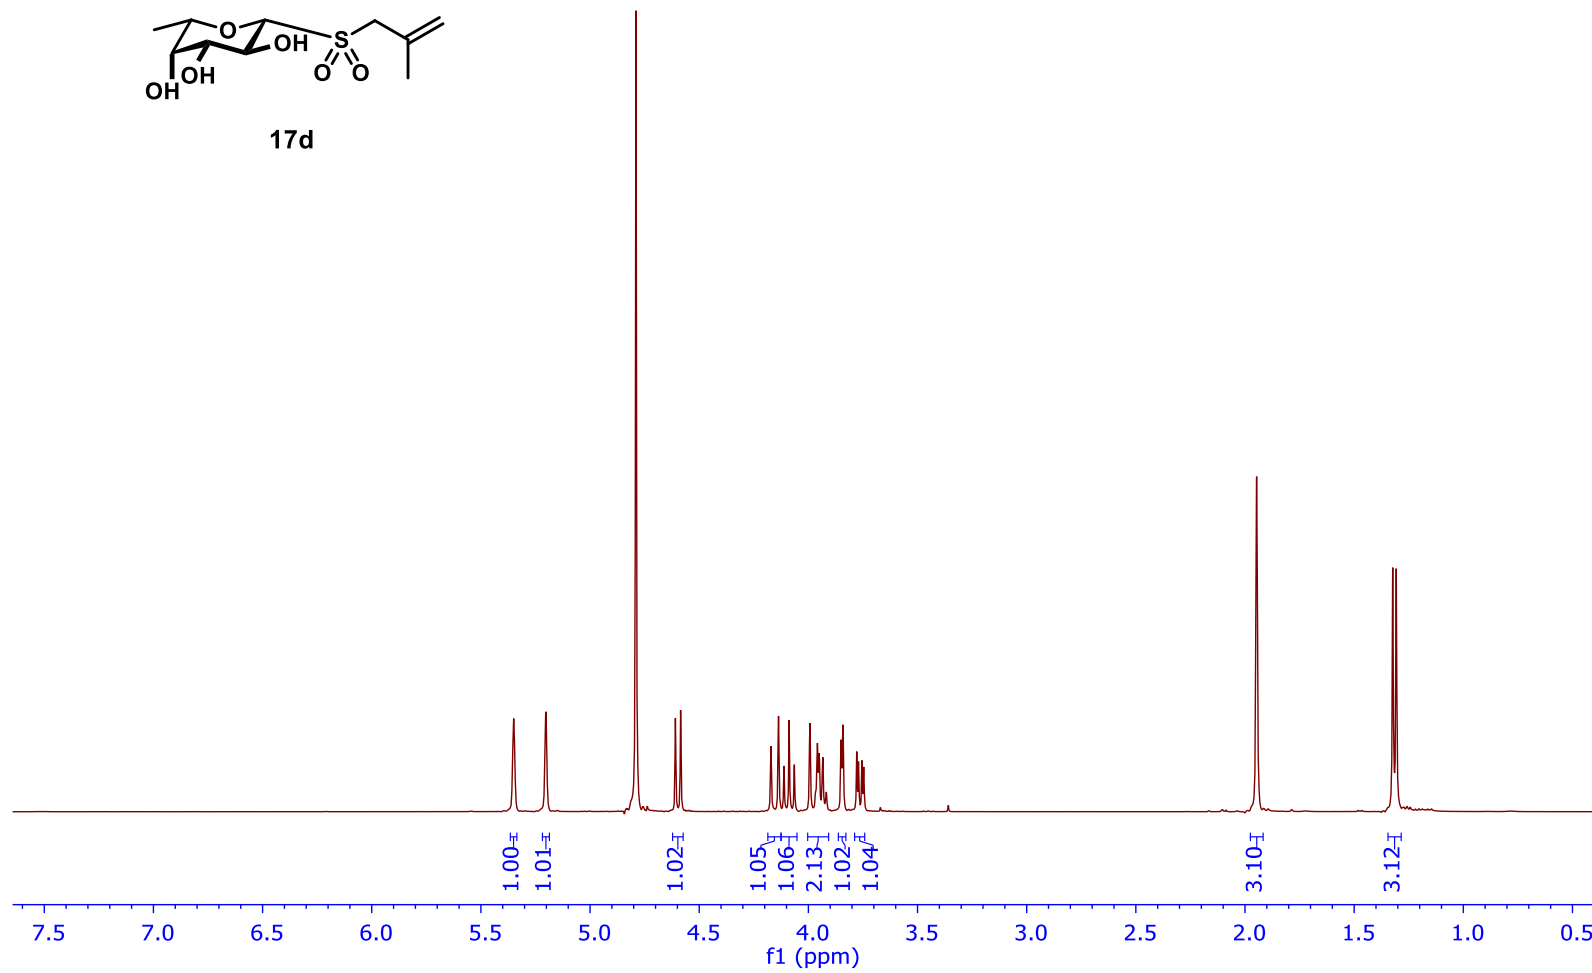

D<sub>2</sub>O, 101 MHz

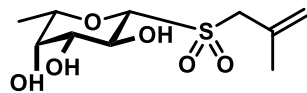

17d

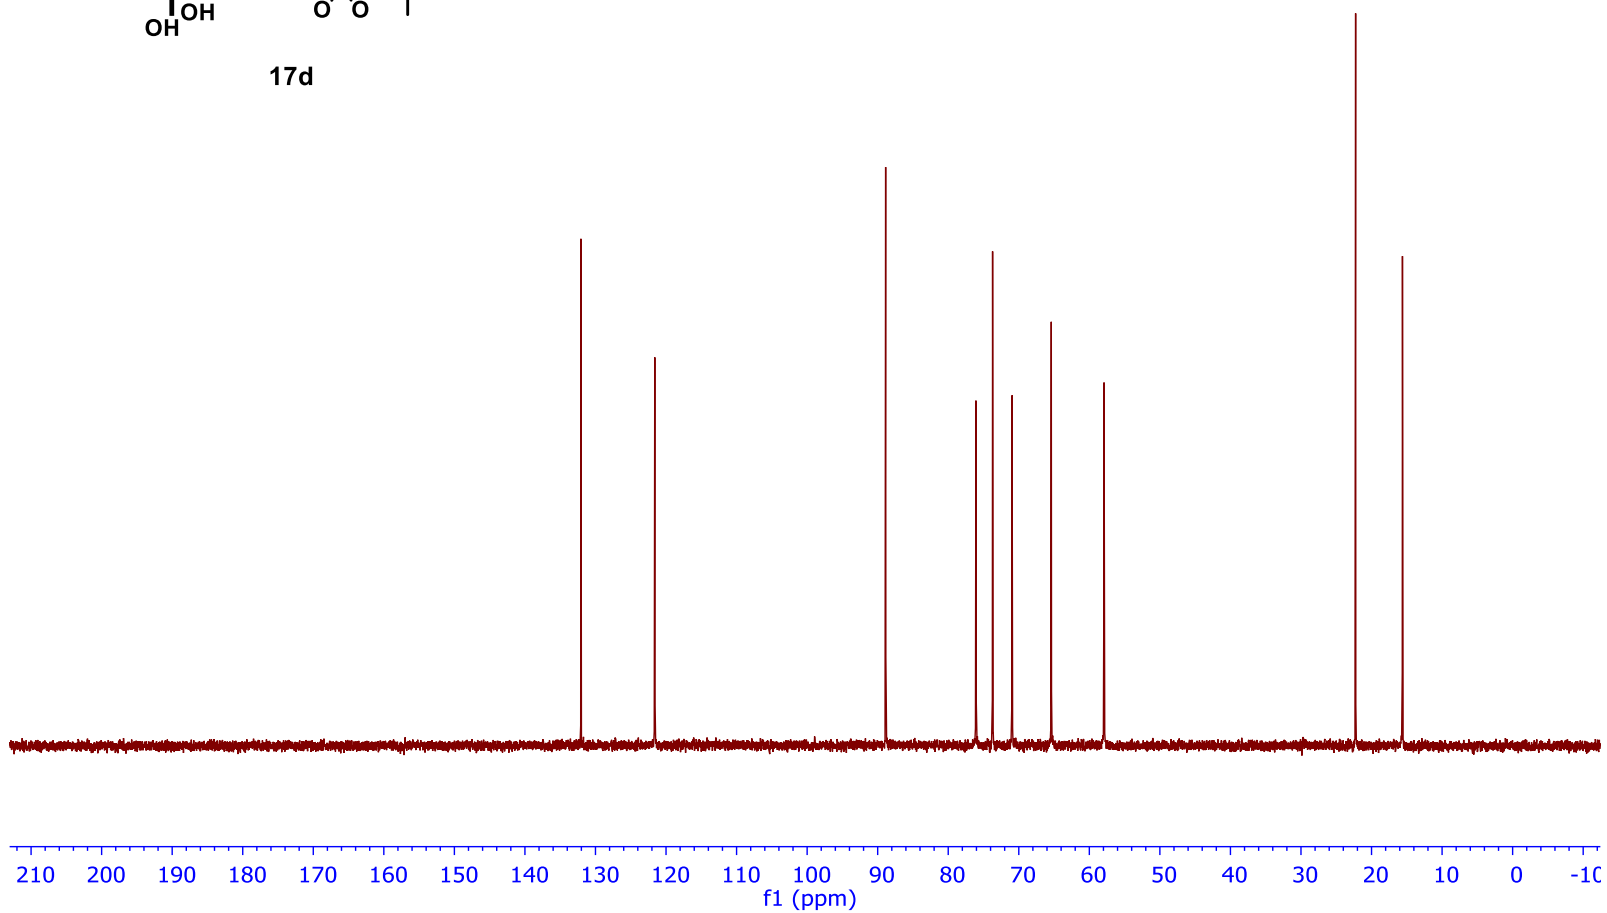

CDCl<sub>3</sub>, 400 MHz

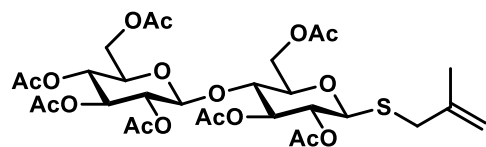

SI-14

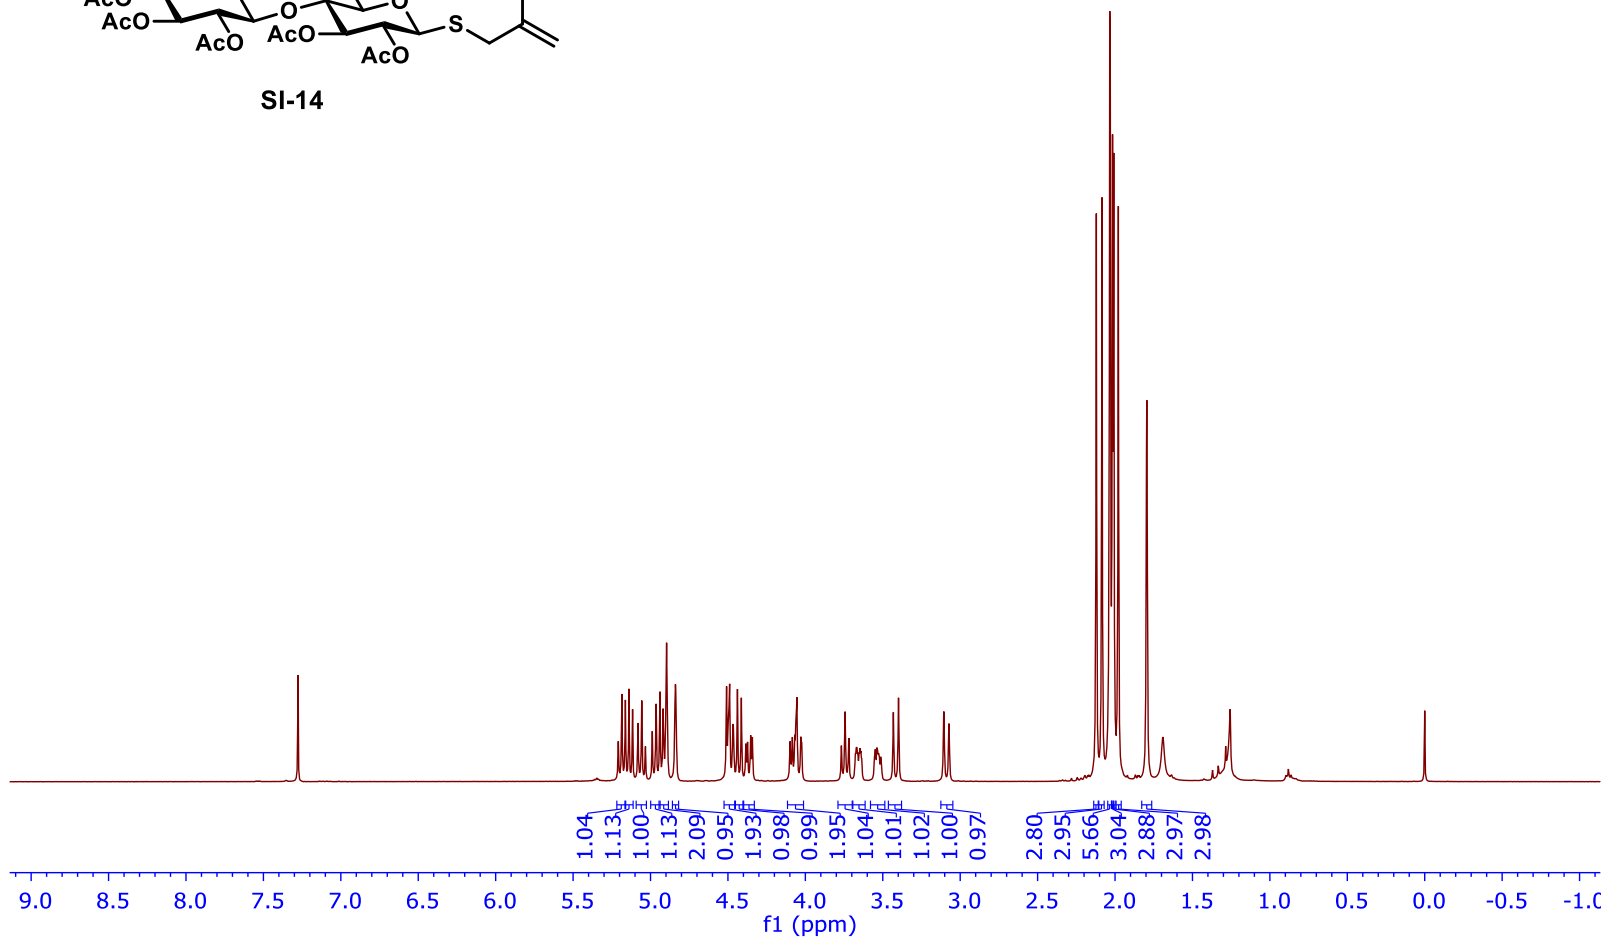

CDCl<sub>3</sub>, 101 MHz

170.57  
170.36  
170.29  
169.88  
169.71  
169.40  
169.17

140.45

114.66

100.95

81.78  
76.75  
76.73  
73.77  
73.07  
72.09  
71.75  
70.27  
67.91  
62.36  
61.69

37.75

20.92  
20.78  
20.75  
20.64  
20.49

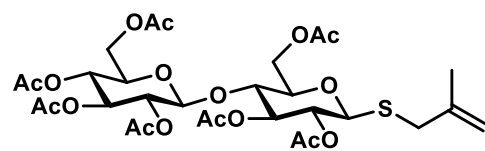

SI-14

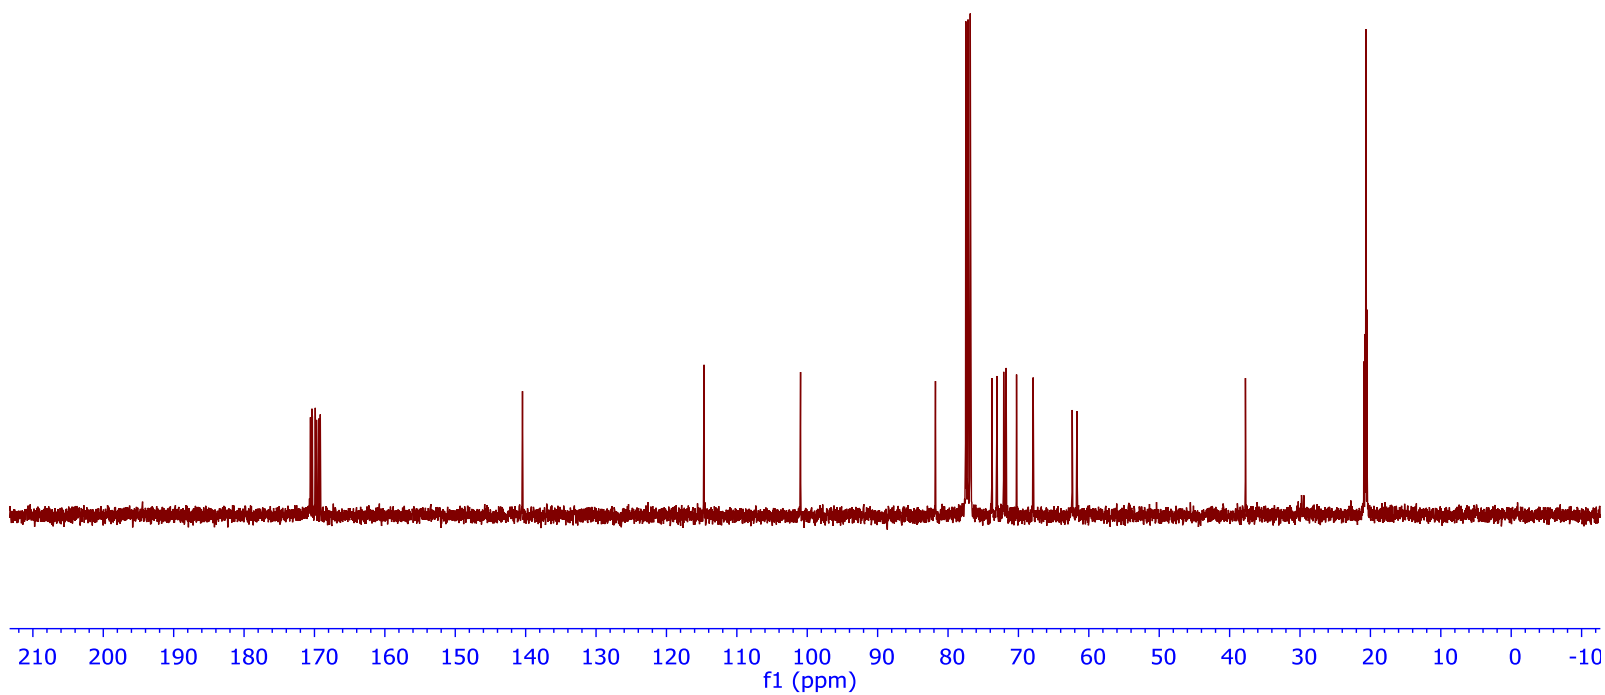

**CDCl<sub>3</sub>, 400 MHz**

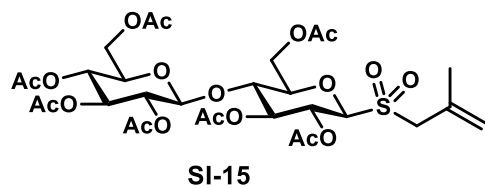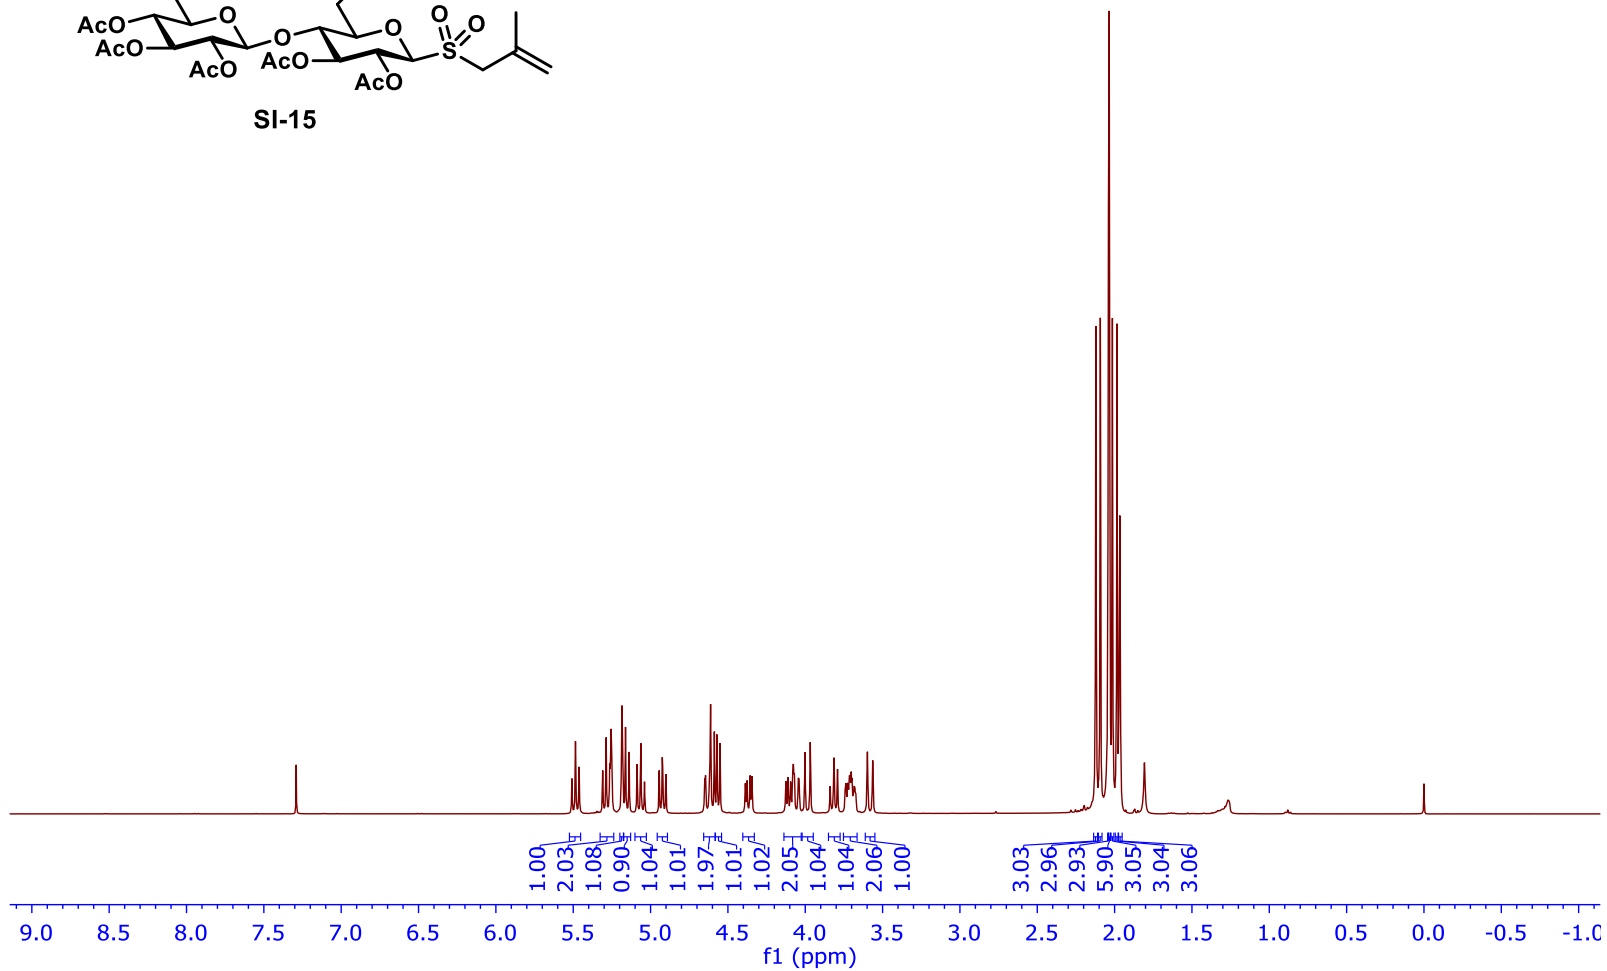

CDCl<sub>3</sub>, 101 MHz

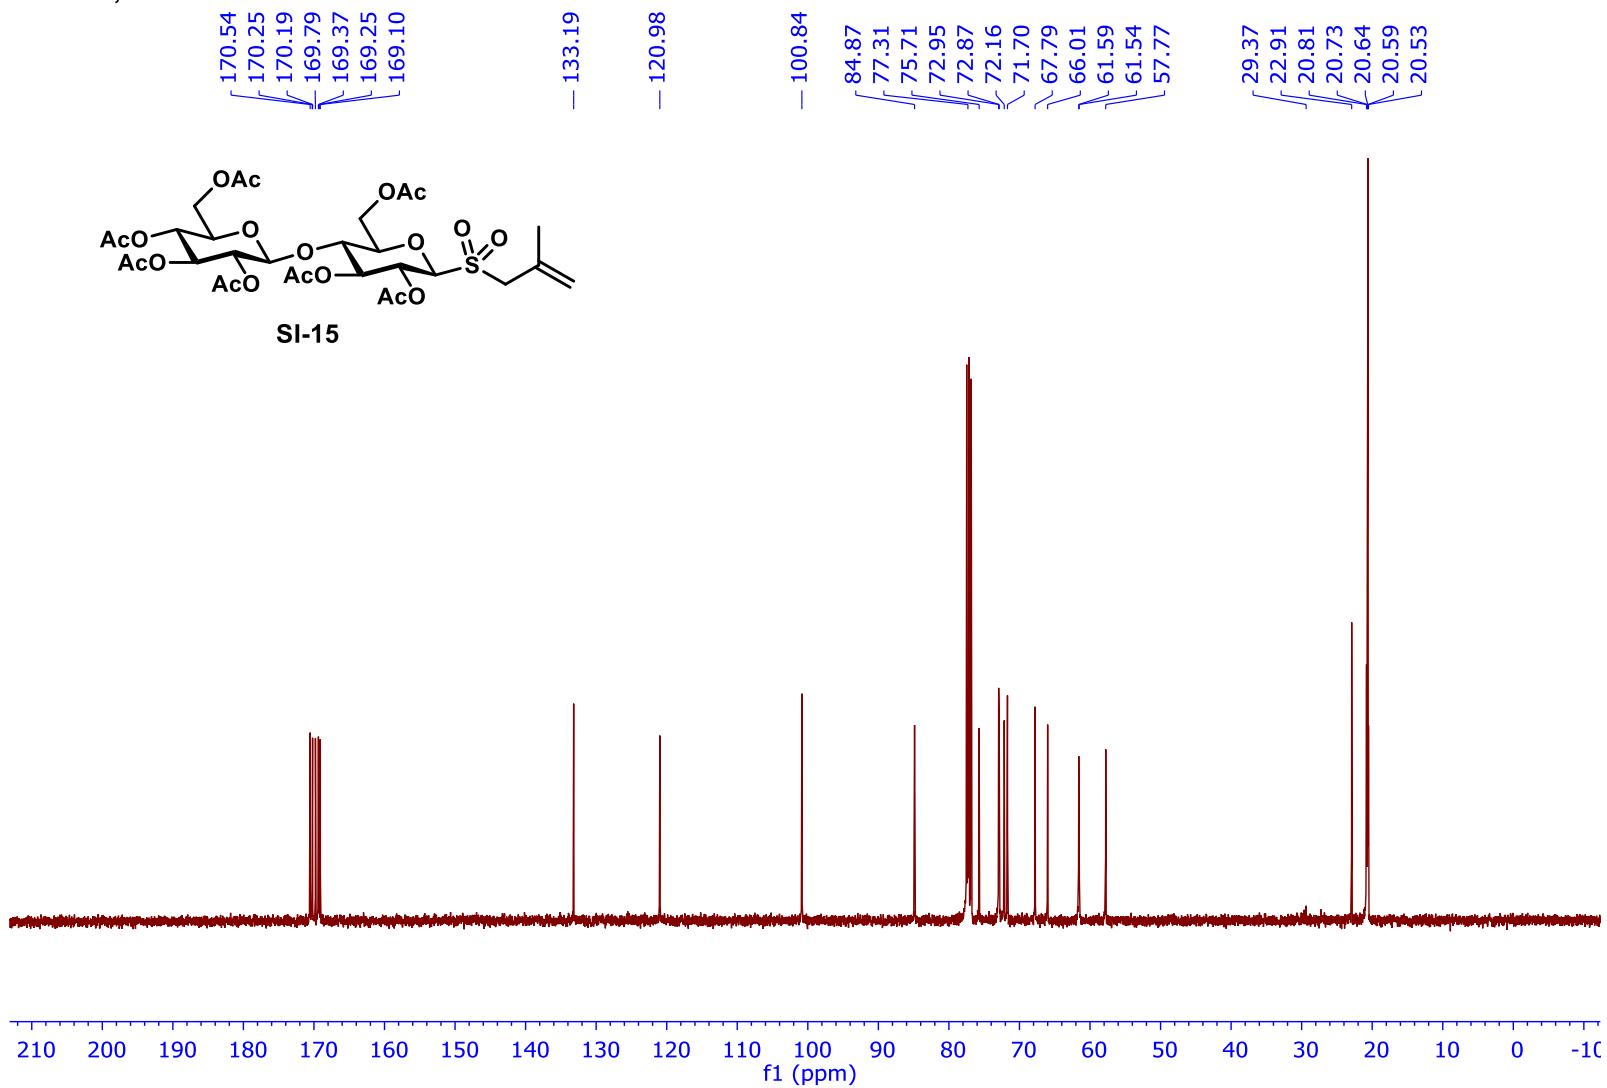

D2O, 400 MHz

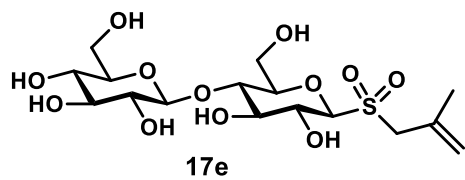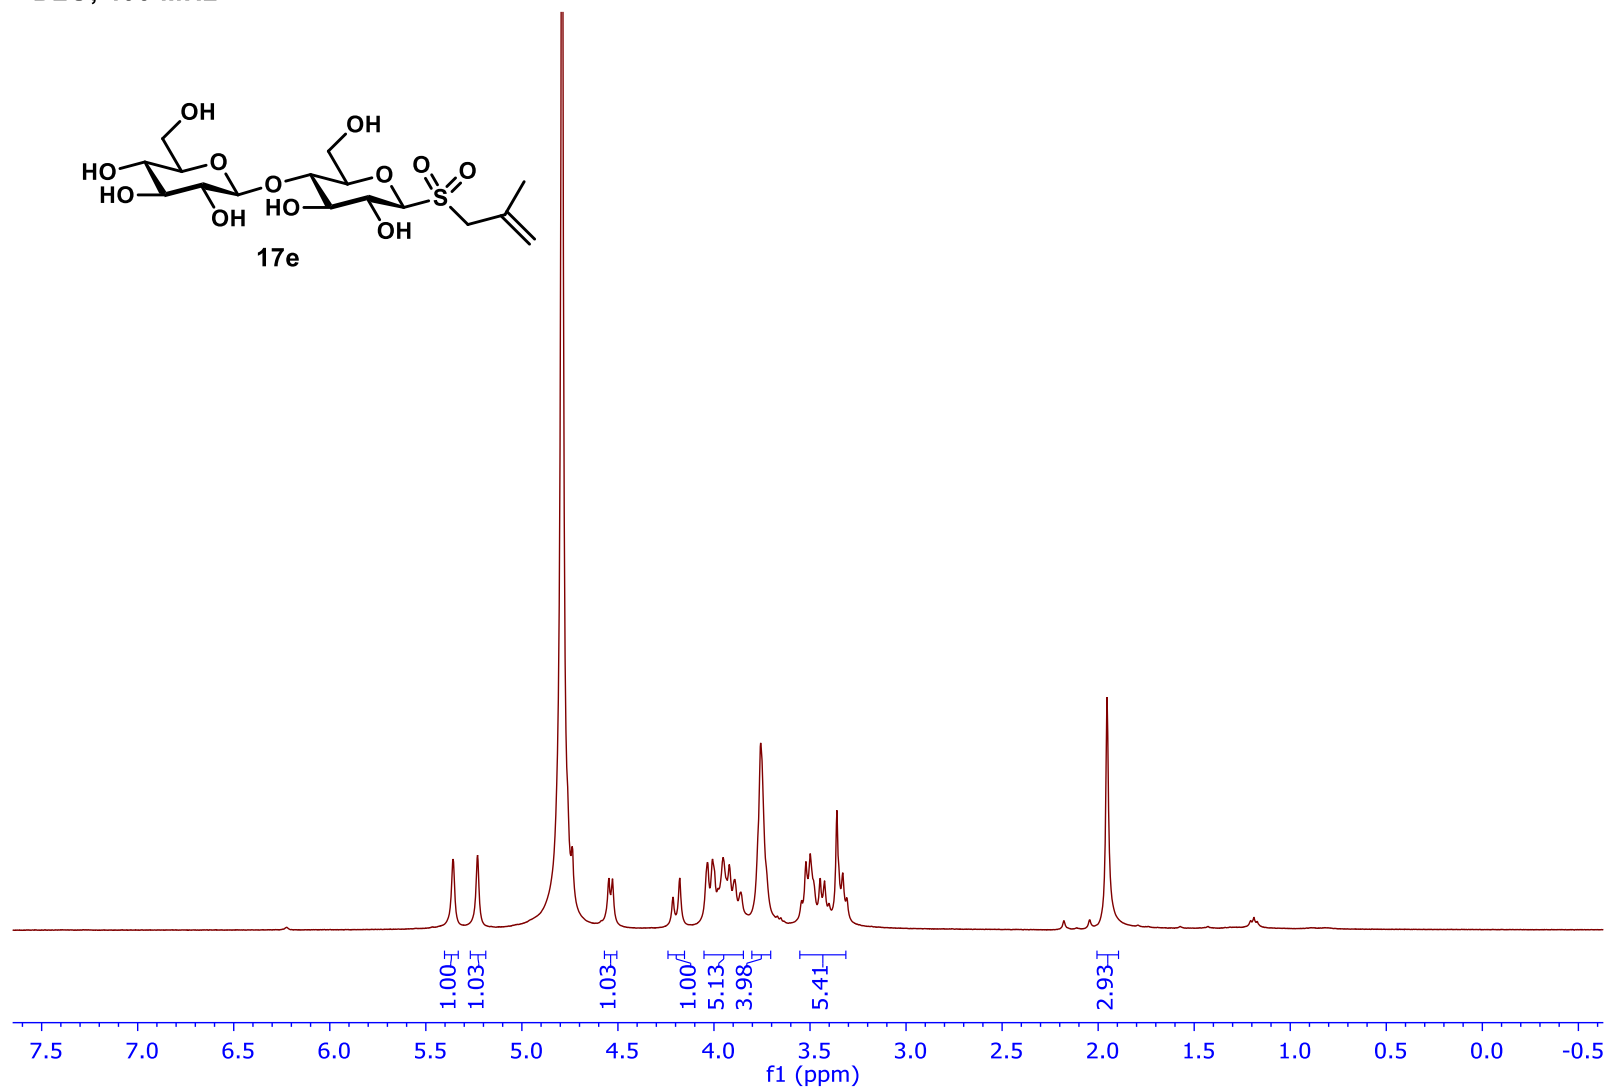

D<sub>2</sub>O, 101 MHz

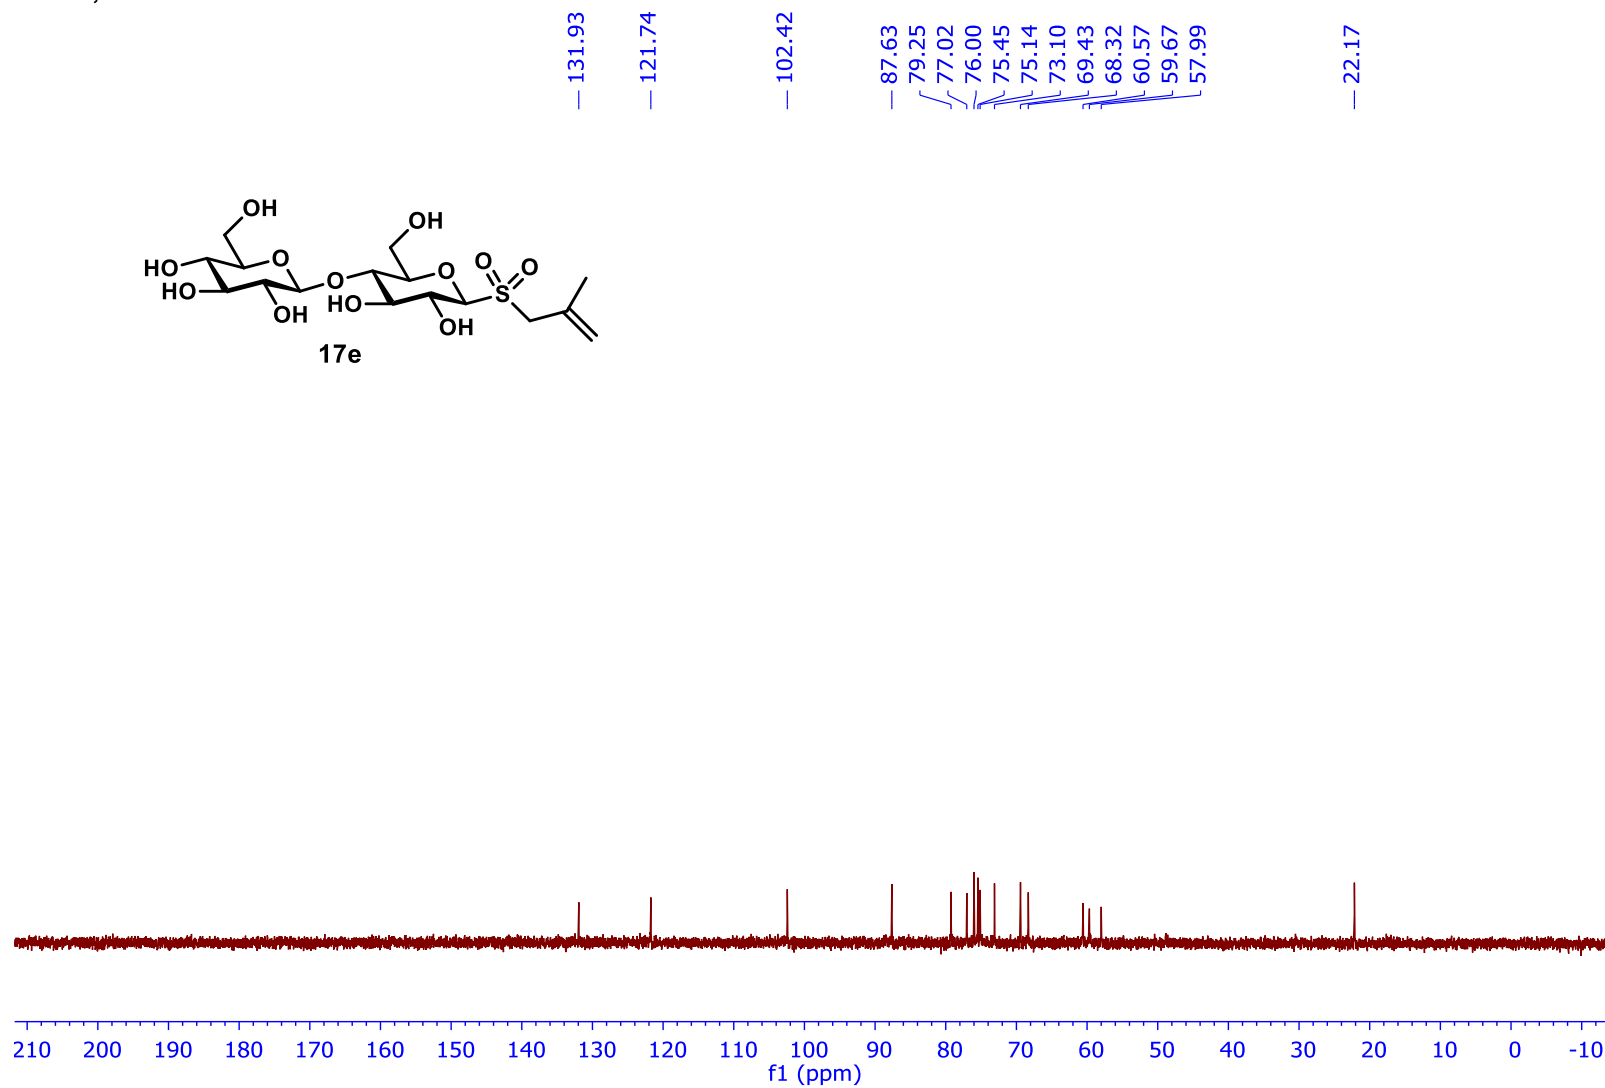

CD3OD, 400 MHz

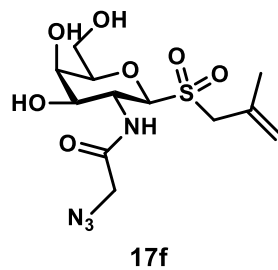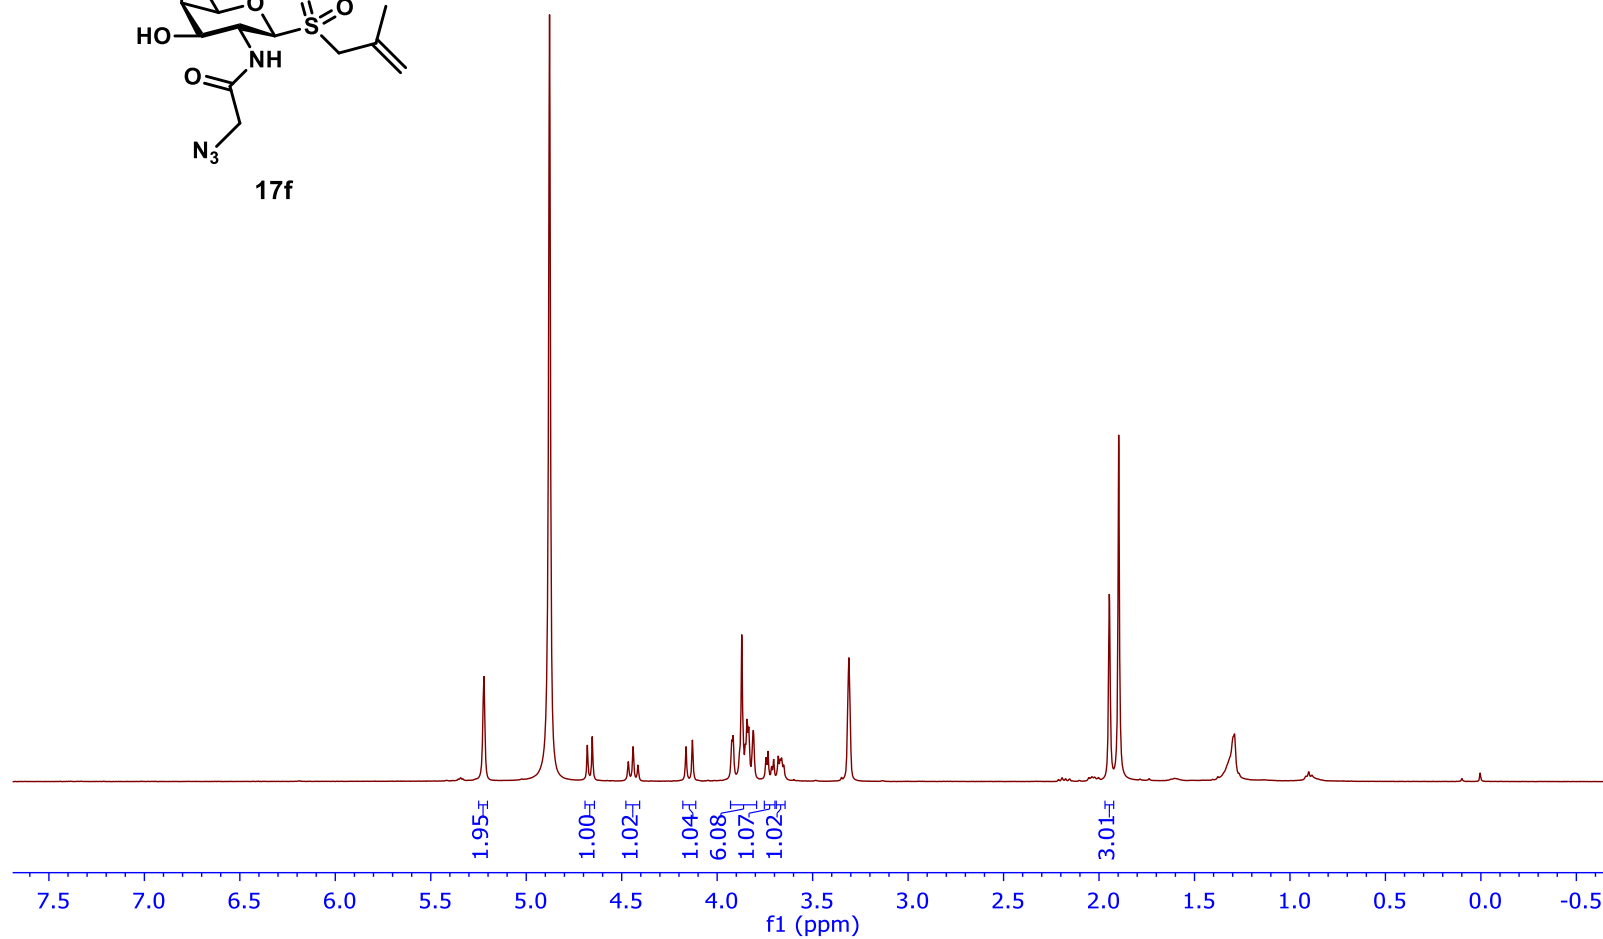

CD3OD, 400 MHz

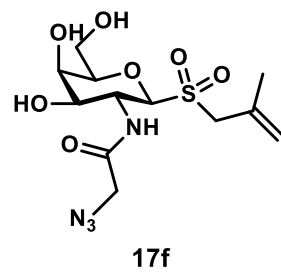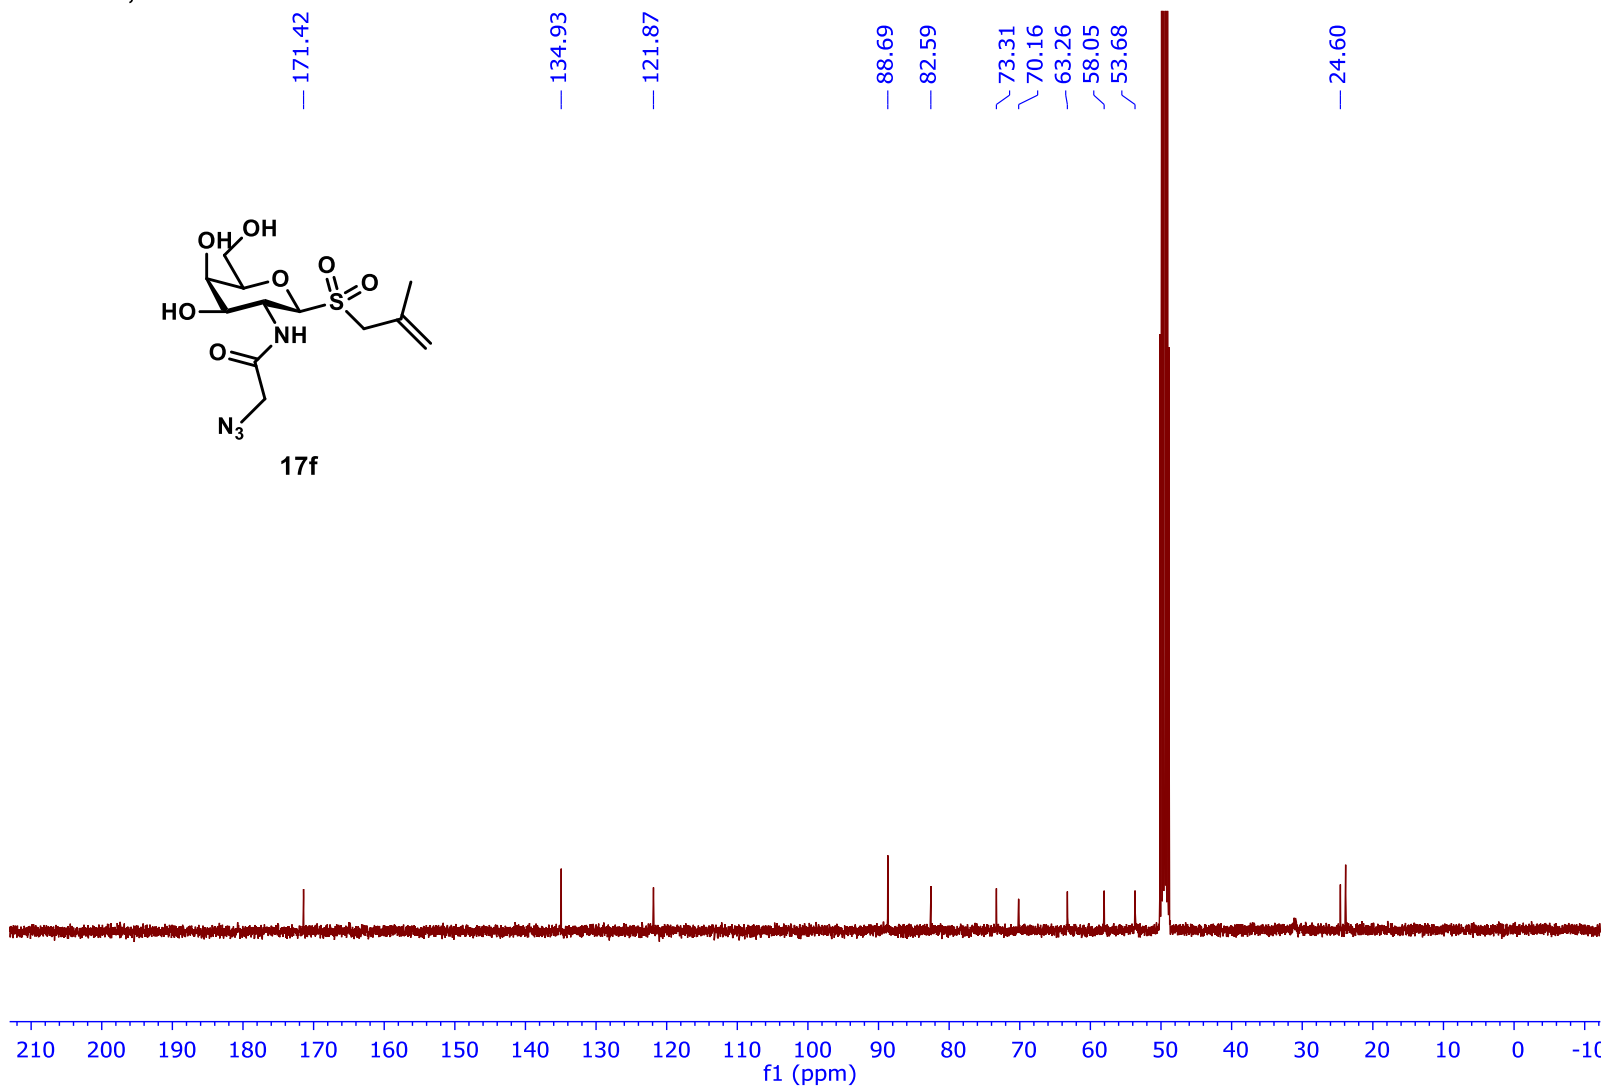

D2O, 400 MHz

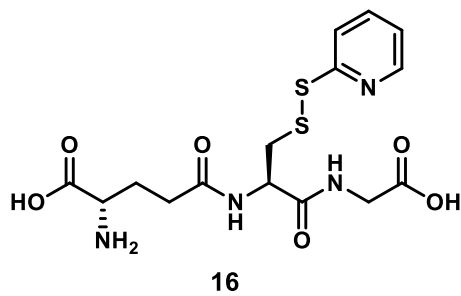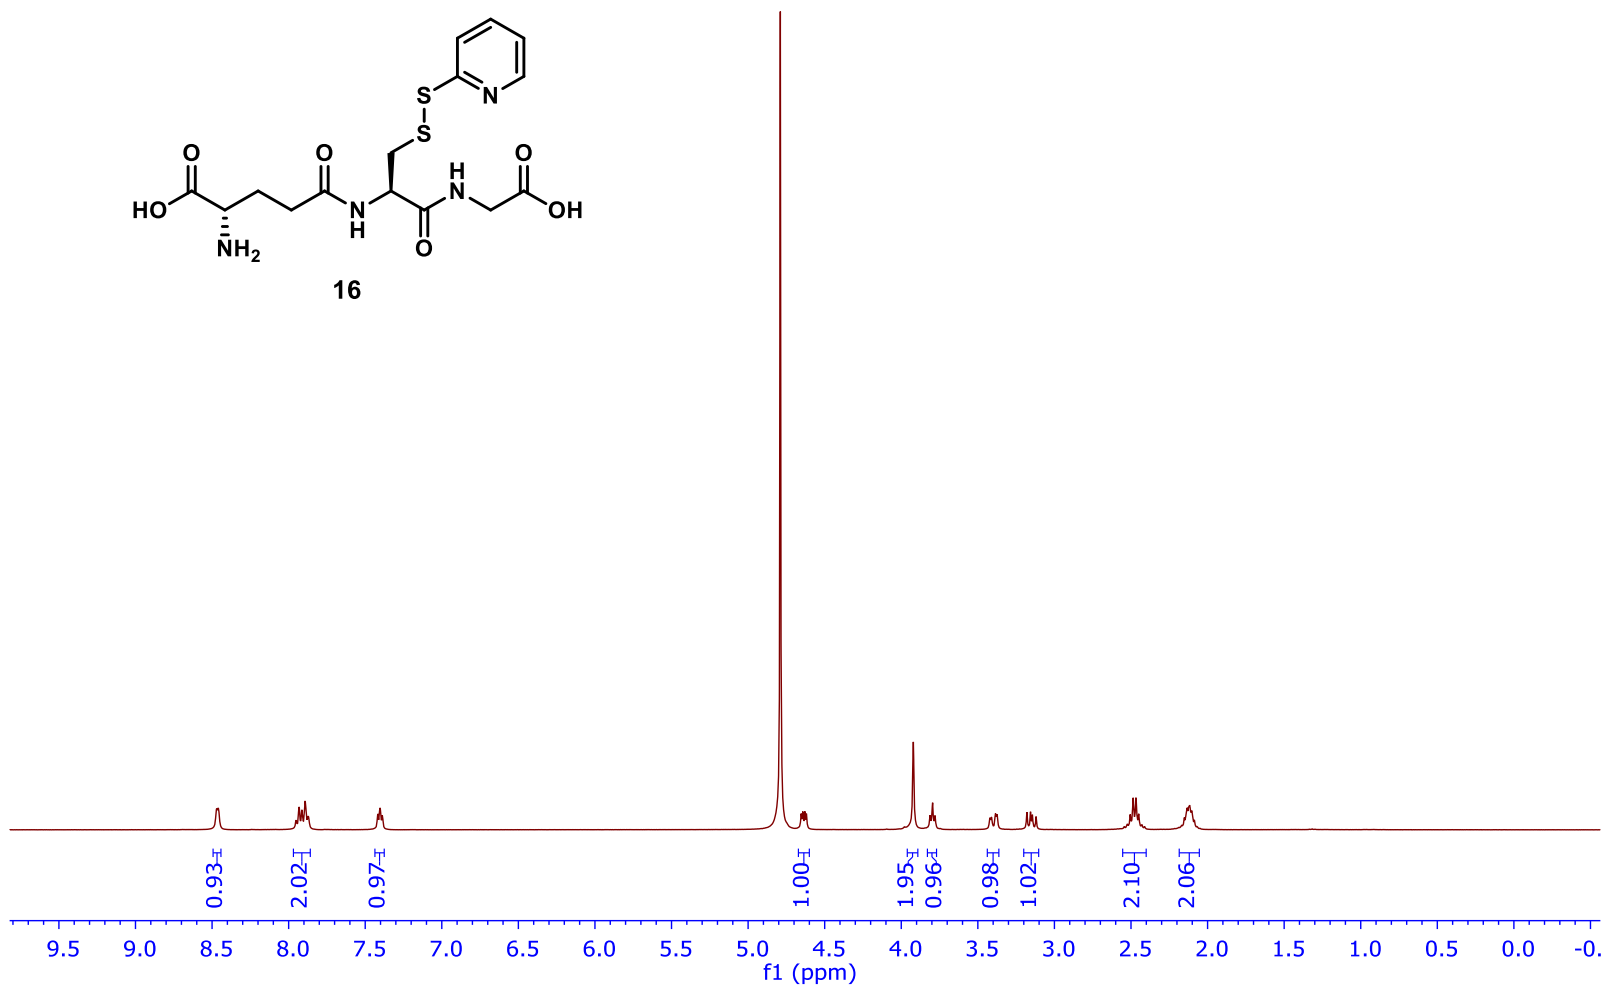

D2O, 101 MHz

174.59  
173.99  
173.65  
172.13

157.78

148.50

139.48

122.50  
122.34

53.90  
52.71

41.95  
39.38

31.25  
26.04

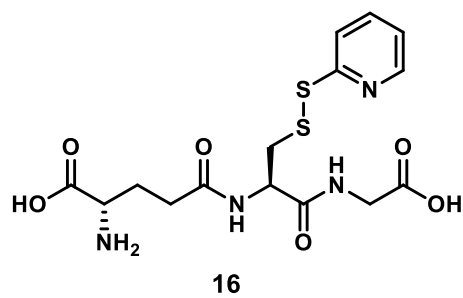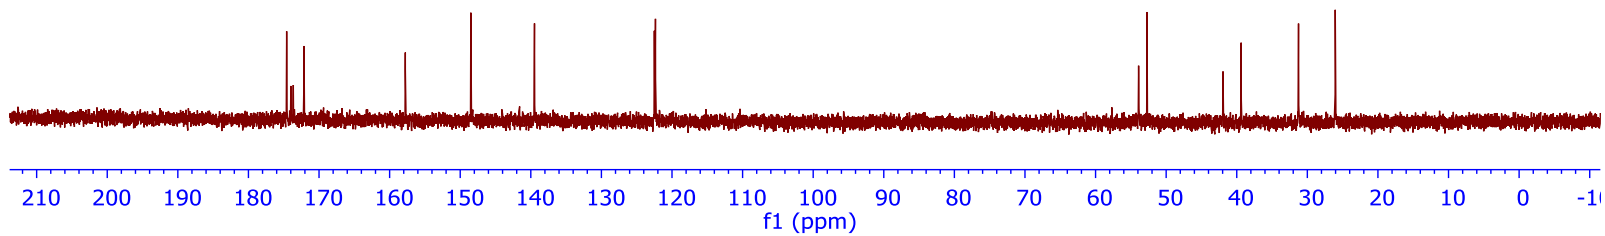

D2O, 400 MHz

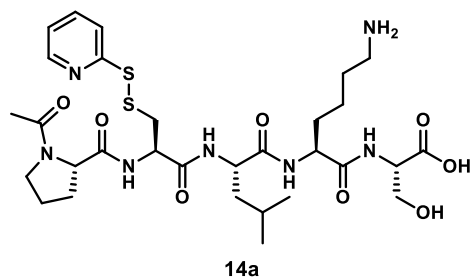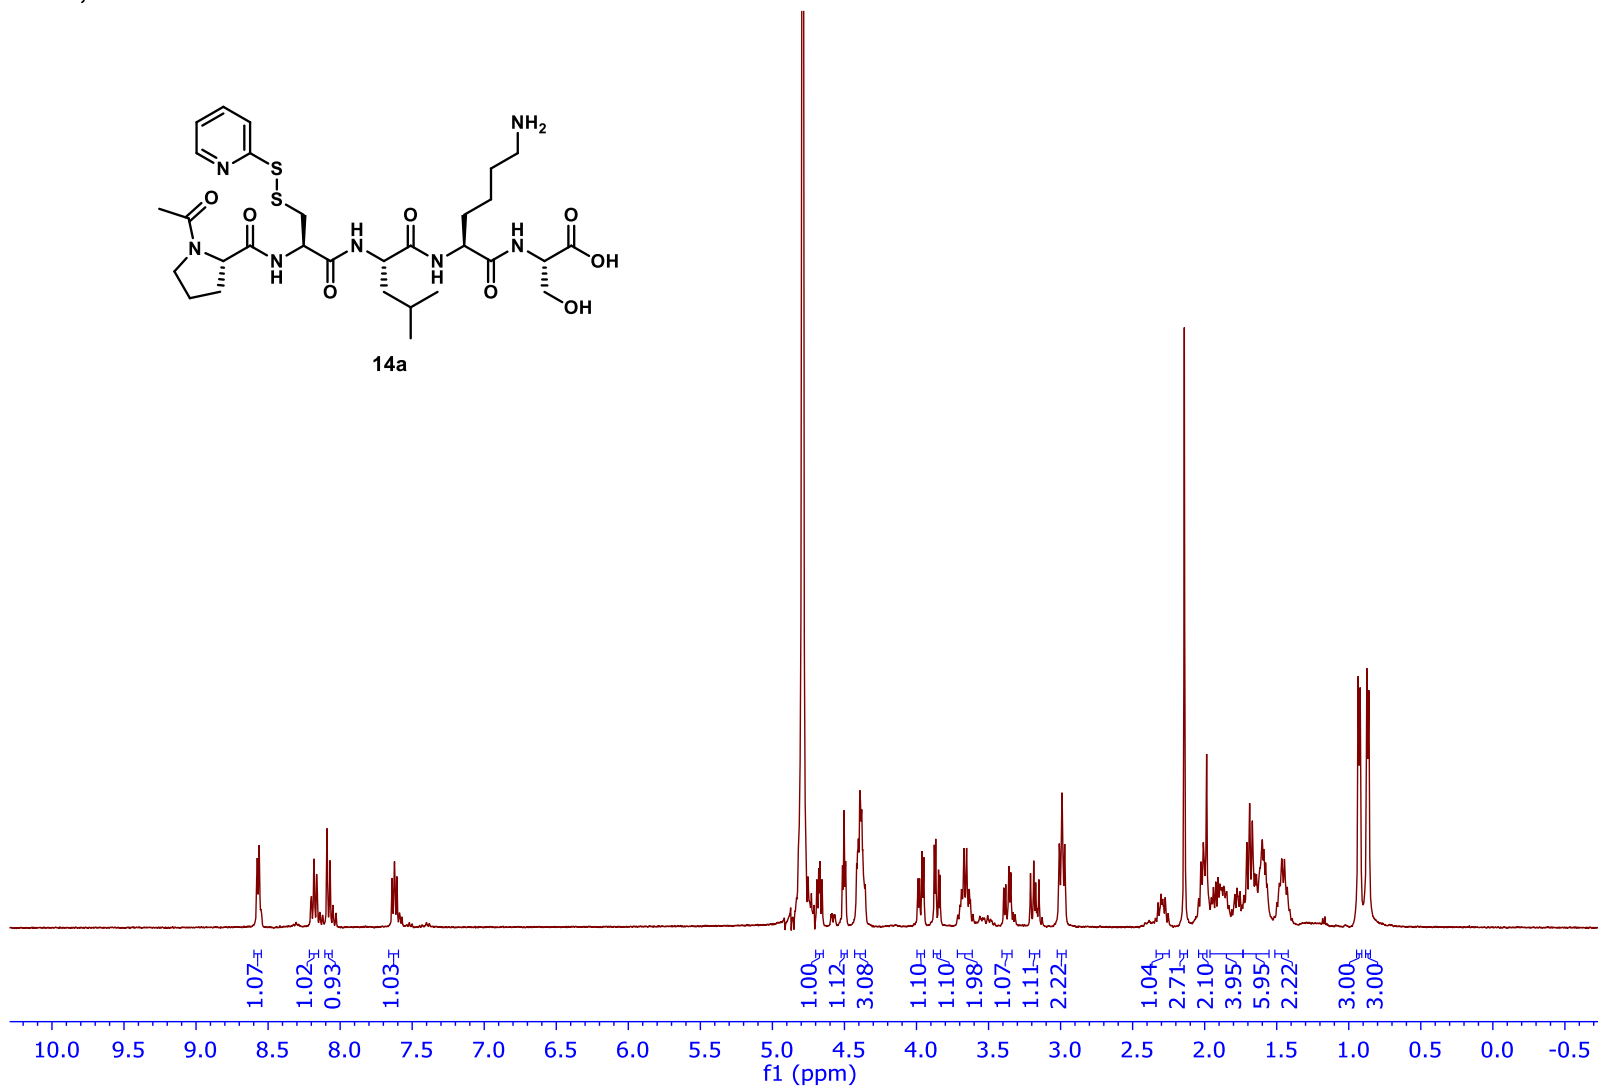

Chemical structure of compound 14a is shown above the spectrum. The structure is a complex molecule featuring a pyridine ring, a thioether linkage, a carbamate group, and a carboxylic acid group. The spectrum displays peaks corresponding to the chemical shifts of the various carbon atoms in the molecule, with the x-axis labeled f1 (ppm) ranging from 210 to -10.

Chemical structure of 14a: CC1(CCN(C1)C(=O)NC(=O)C[C@H](N)C(=O)N[C@@H](C)C(=O)N[C@@H](CO)C(=O)O)S[C@@H](C2=CC=CC=N2)C

Peak list (ppm):

| Peak List (ppm)                                                                                                                                                                                                             |
|-----------------------------------------------------------------------------------------------------------------------------------------------------------------------------------------------------------------------------|
| 174.62, 174.17, 173.39, 173.28, 173.20, 171.29, 156.30, 145.41, 142.86, 123.99, 123.37, 61.03, 60.20, 54.83, 53.27, 52.45, 52.30, 48.65, 39.65, 39.14, 39.06, 30.40, 29.89, 26.19, 24.30, 24.21, 22.10, 21.89, 21.43, 20.56 |

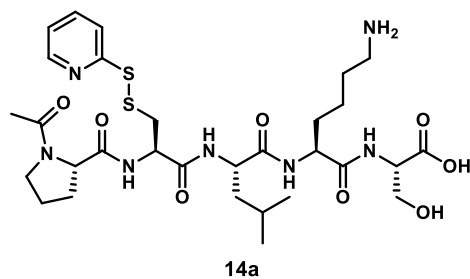

DMSO, 400 MHz

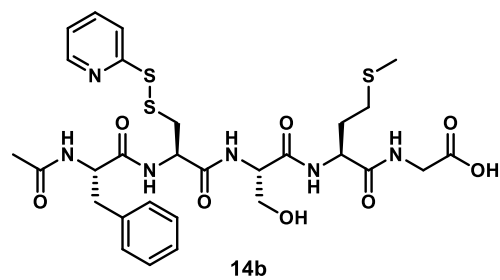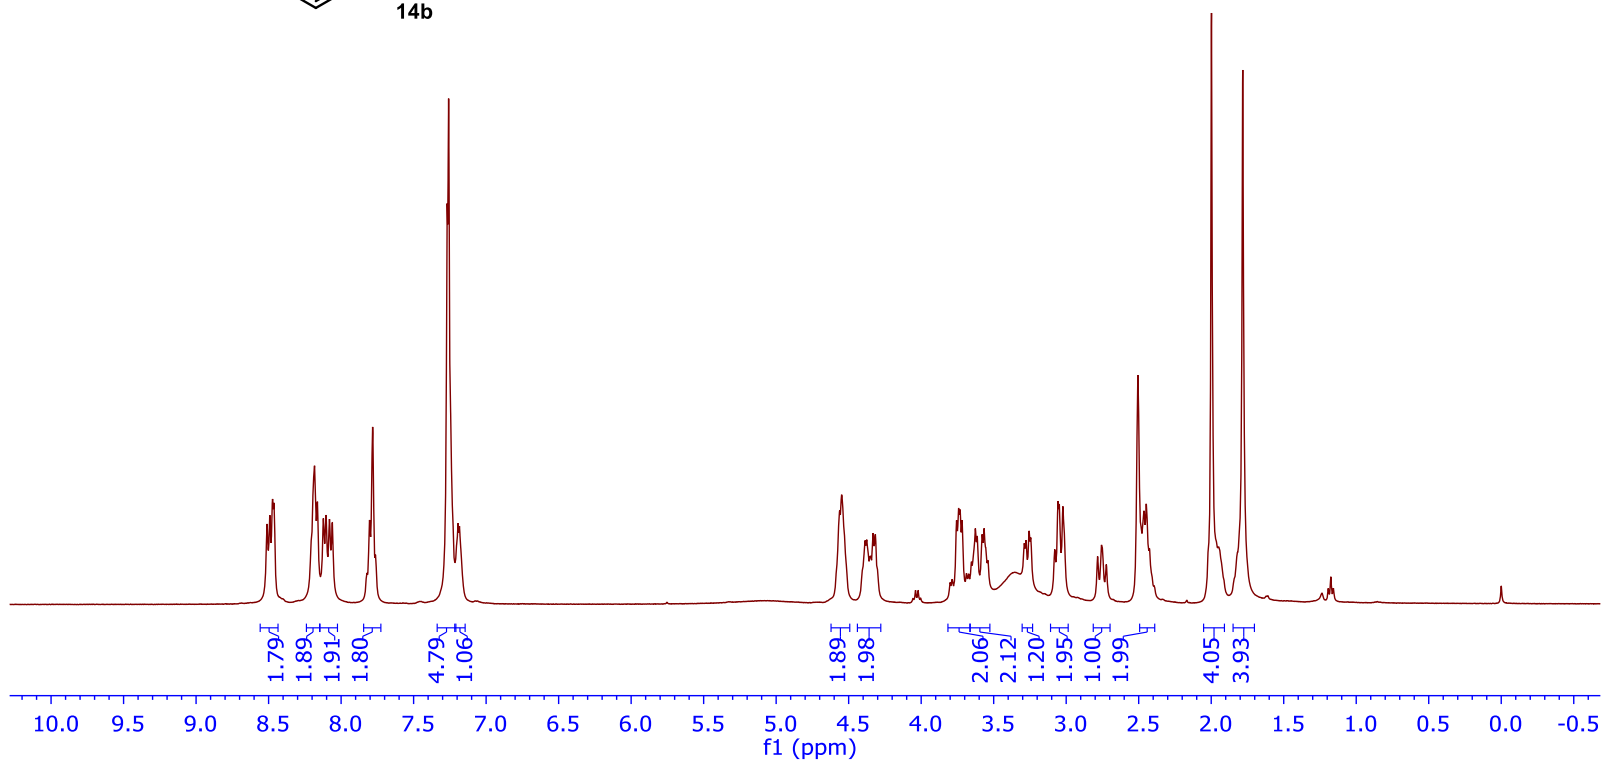

DMSO, 101 MHz

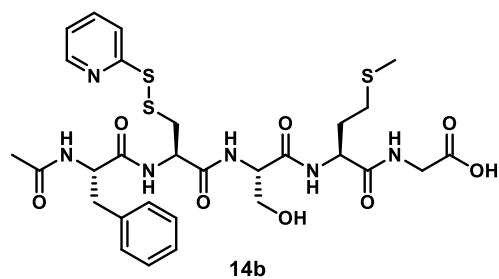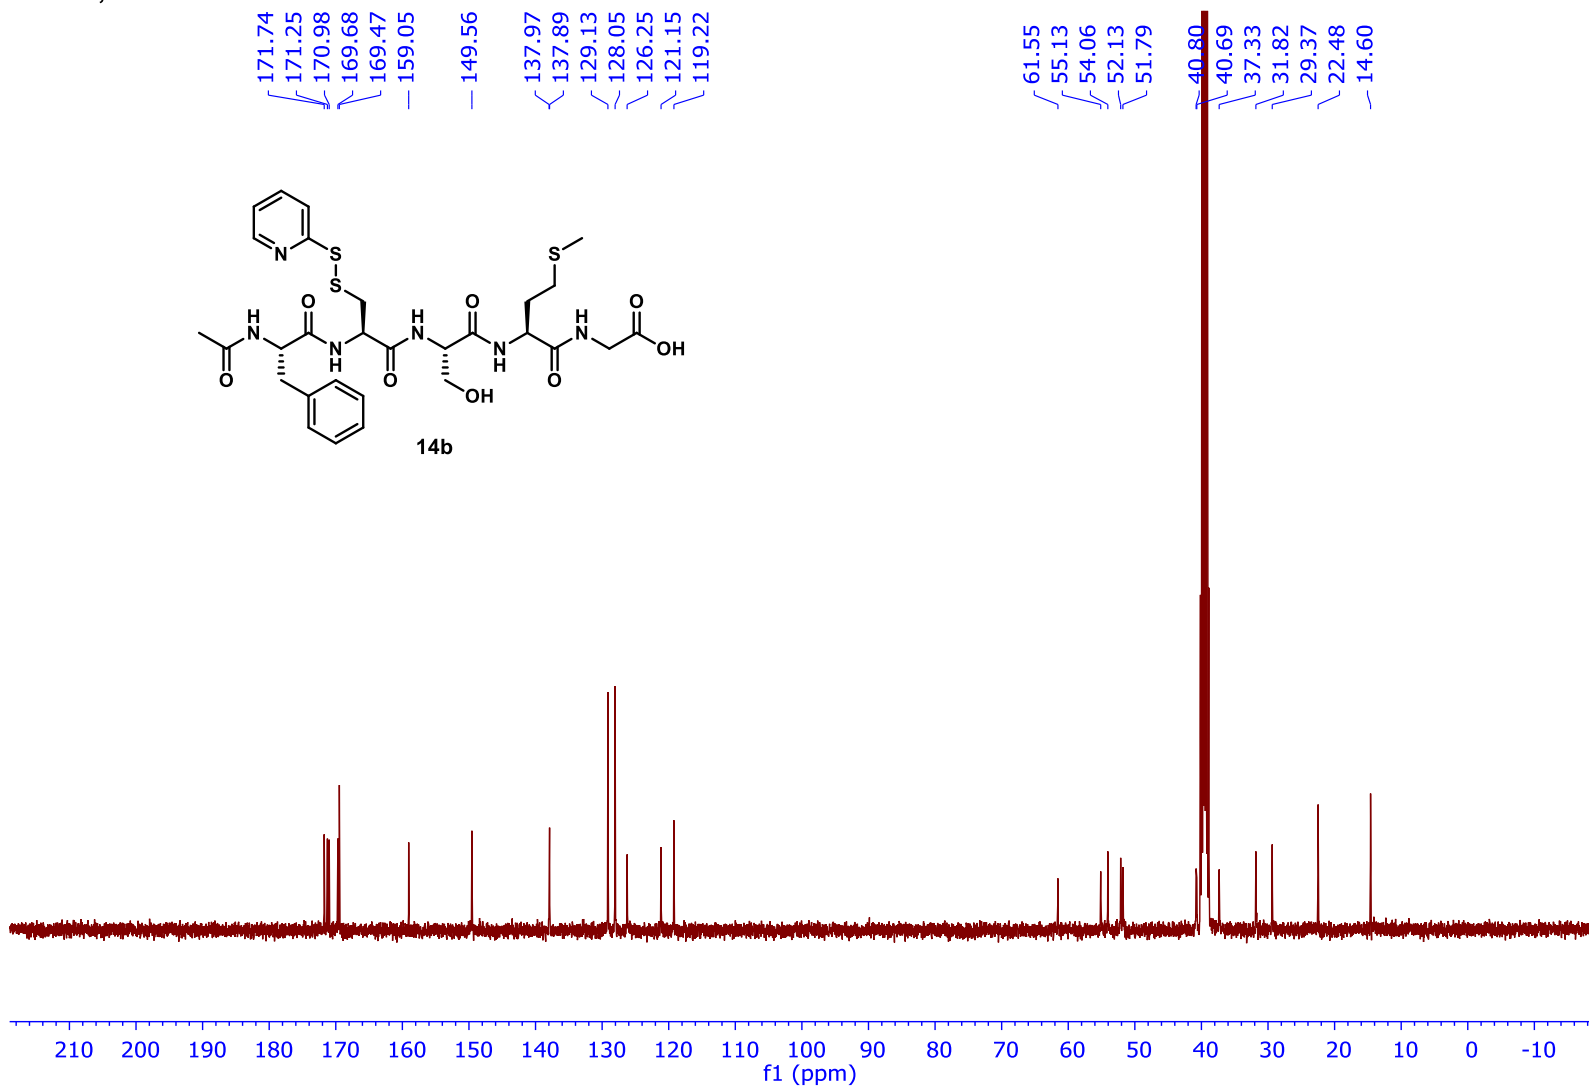

DMSO, 400 MHz

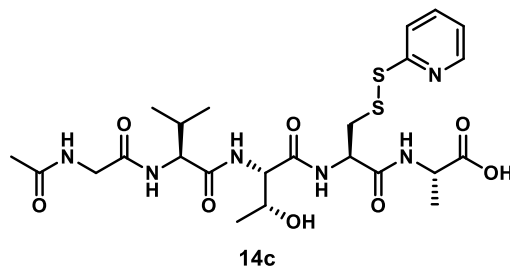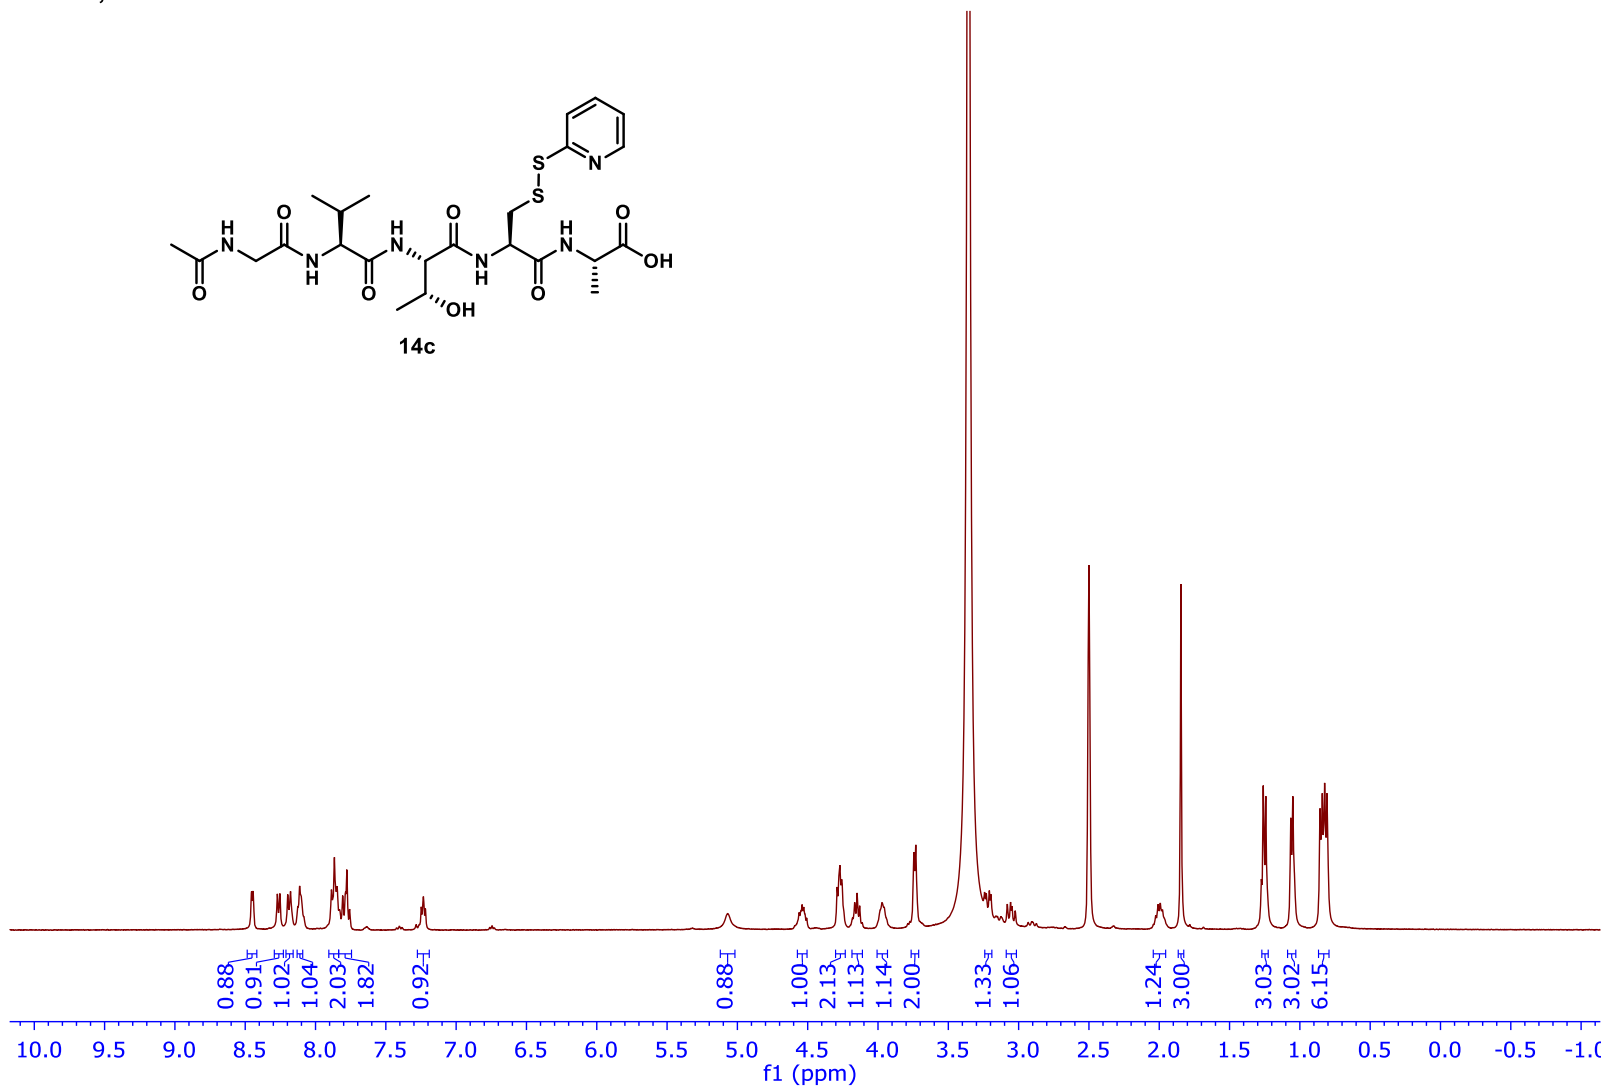

DMSO, 101 MHz

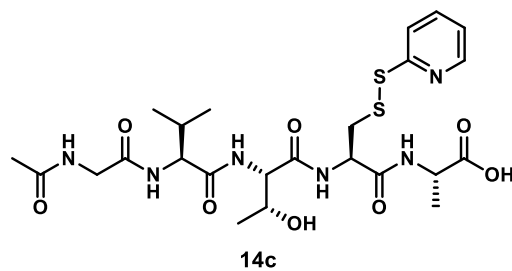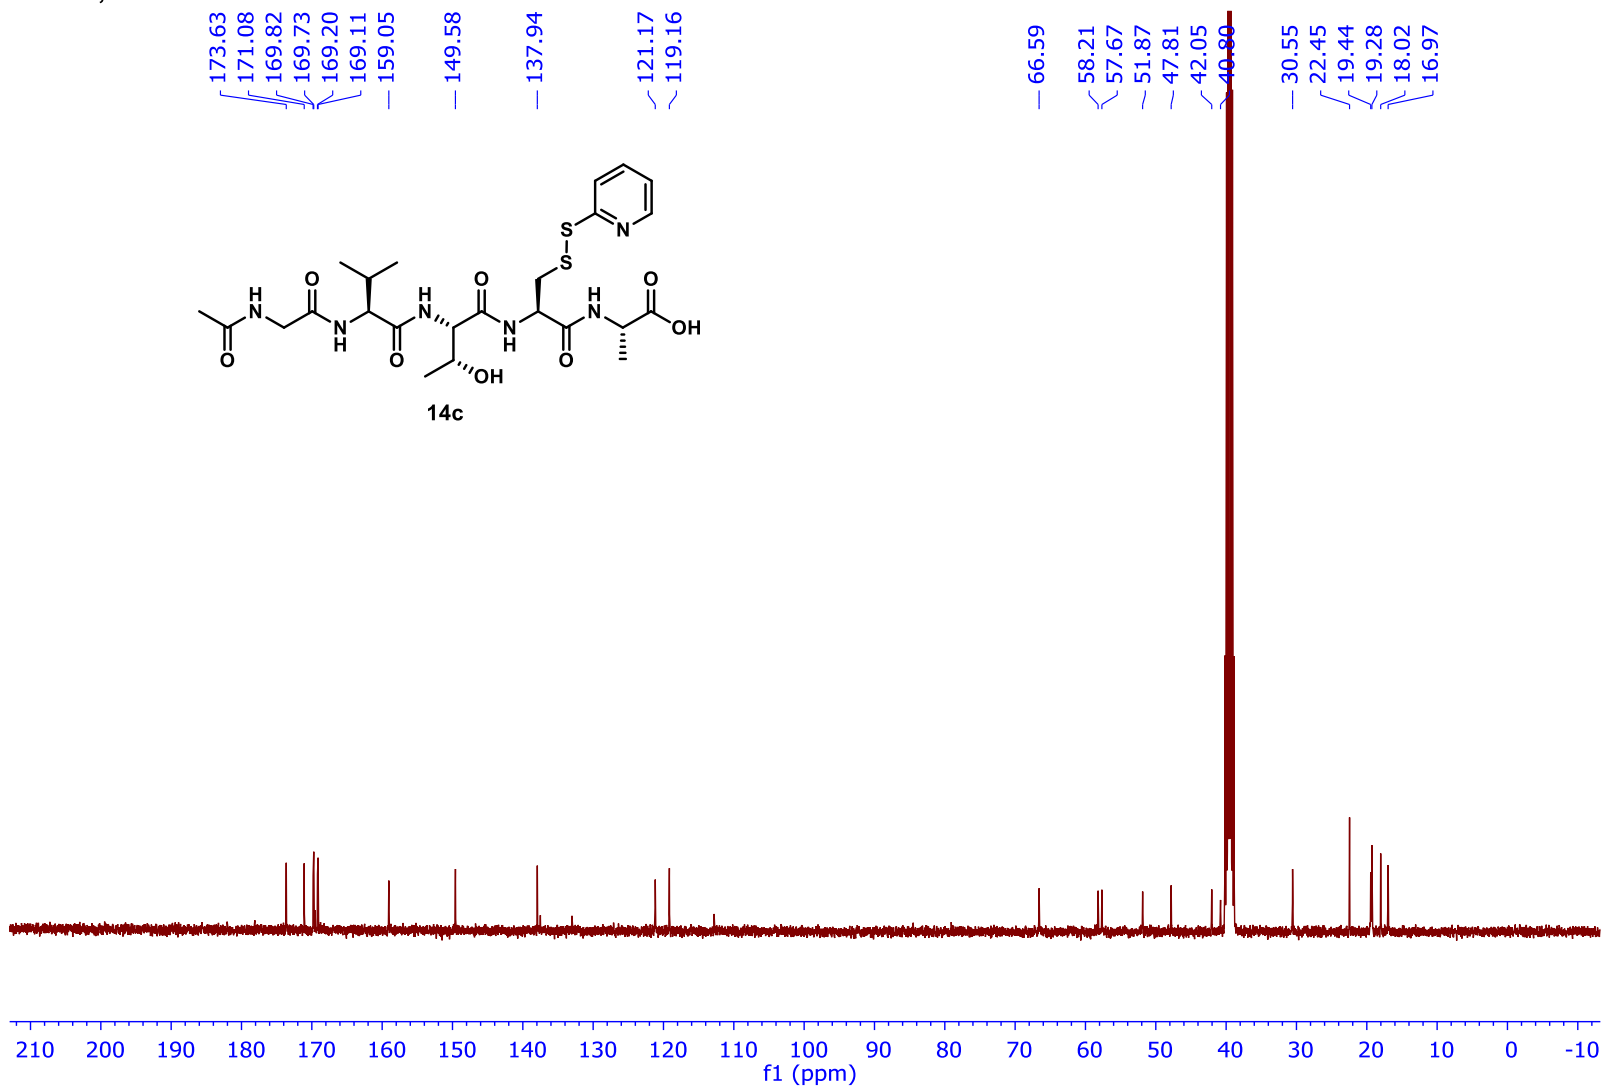

DMSO, 400 MHz

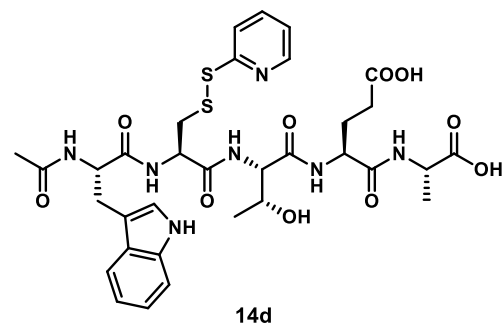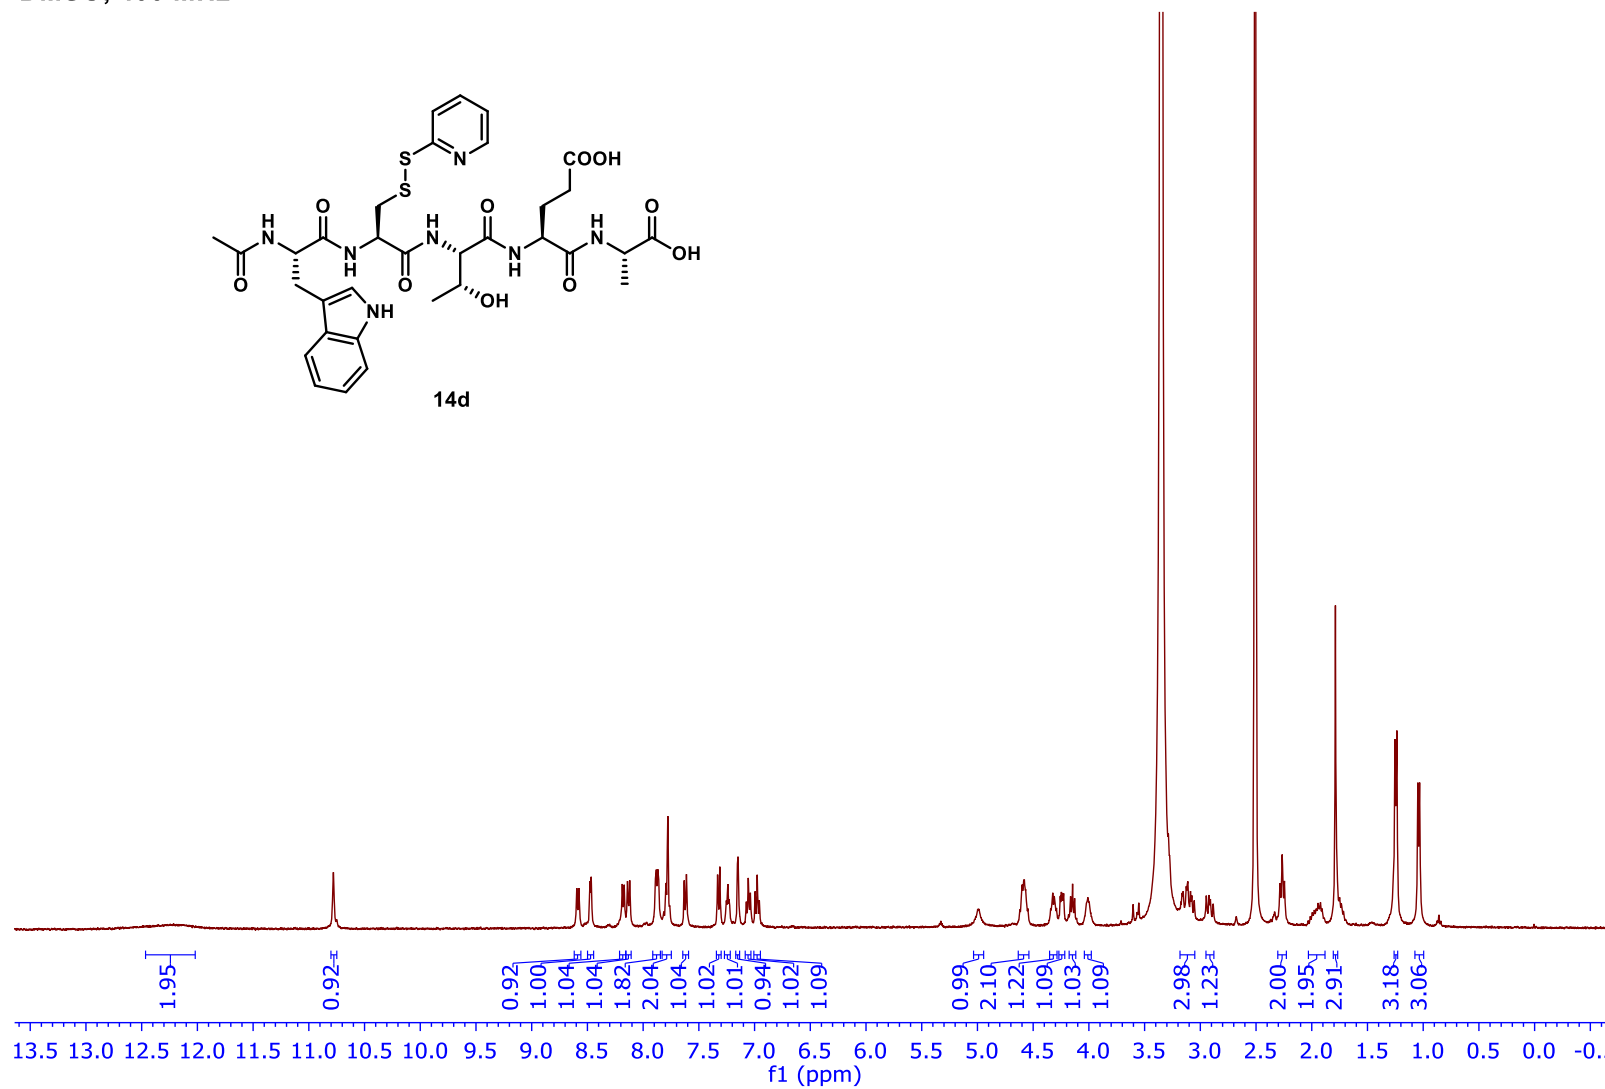

DMSO, 101 MHz

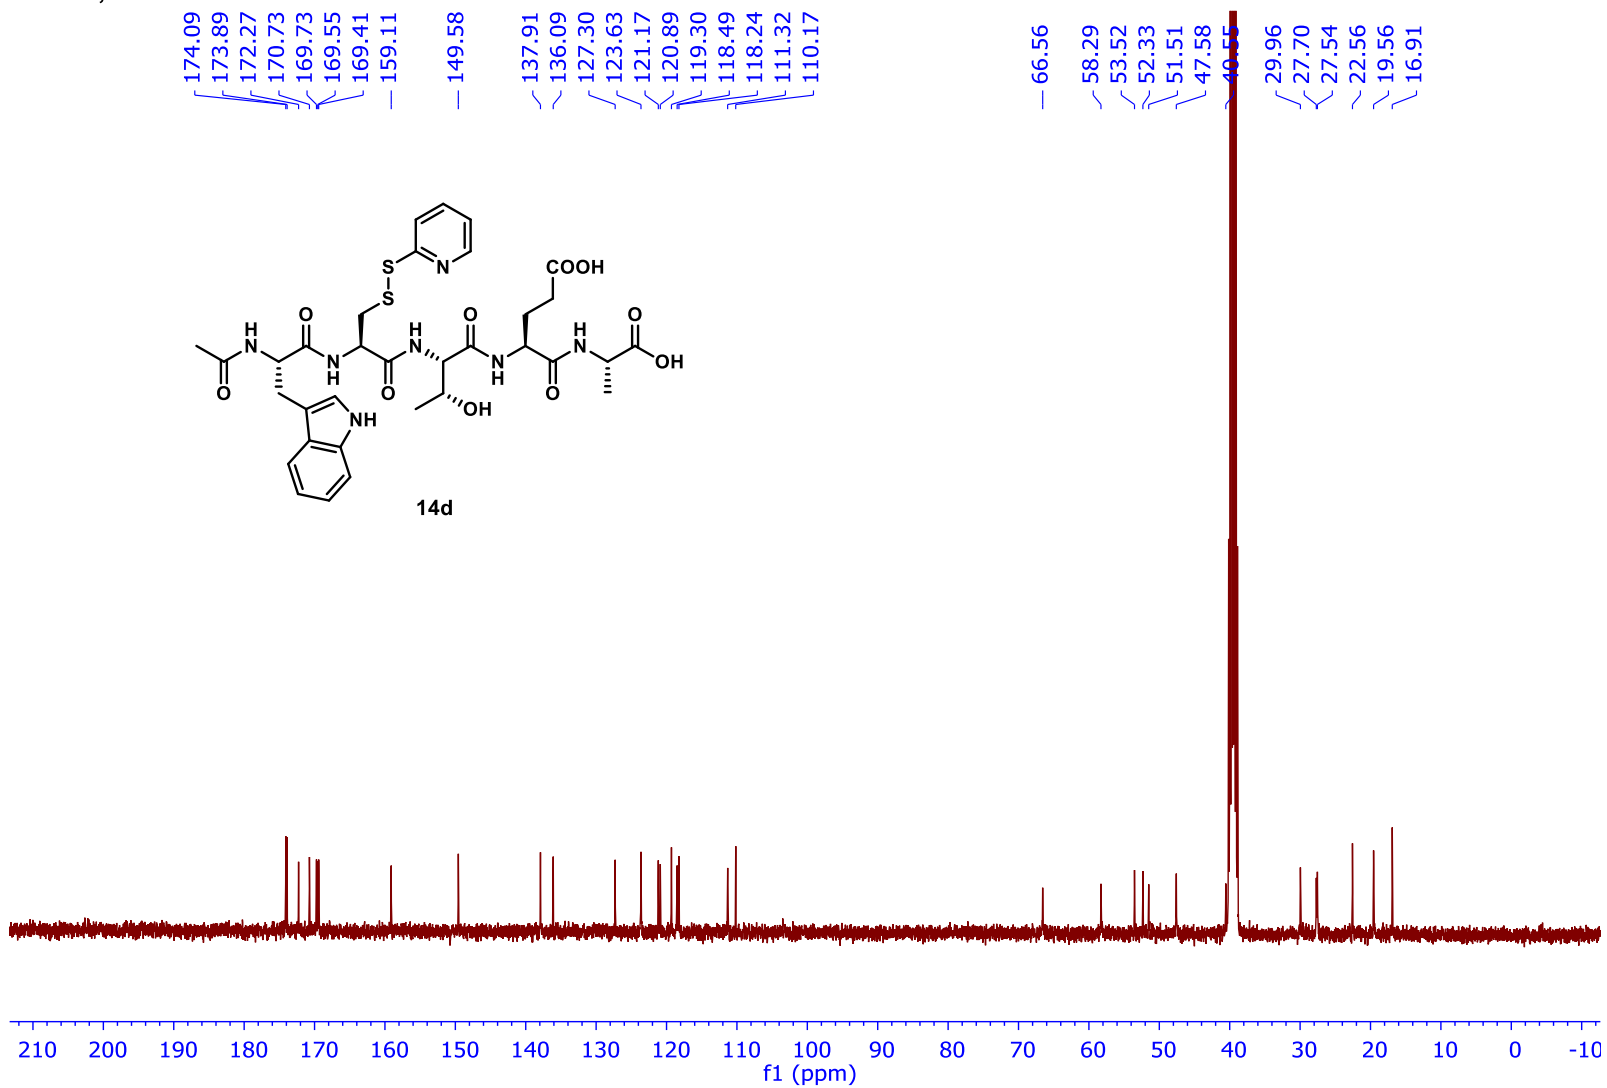

DMSO, 400 MHz

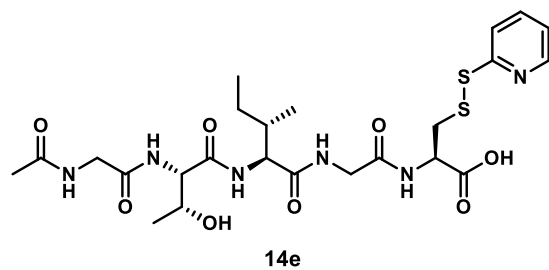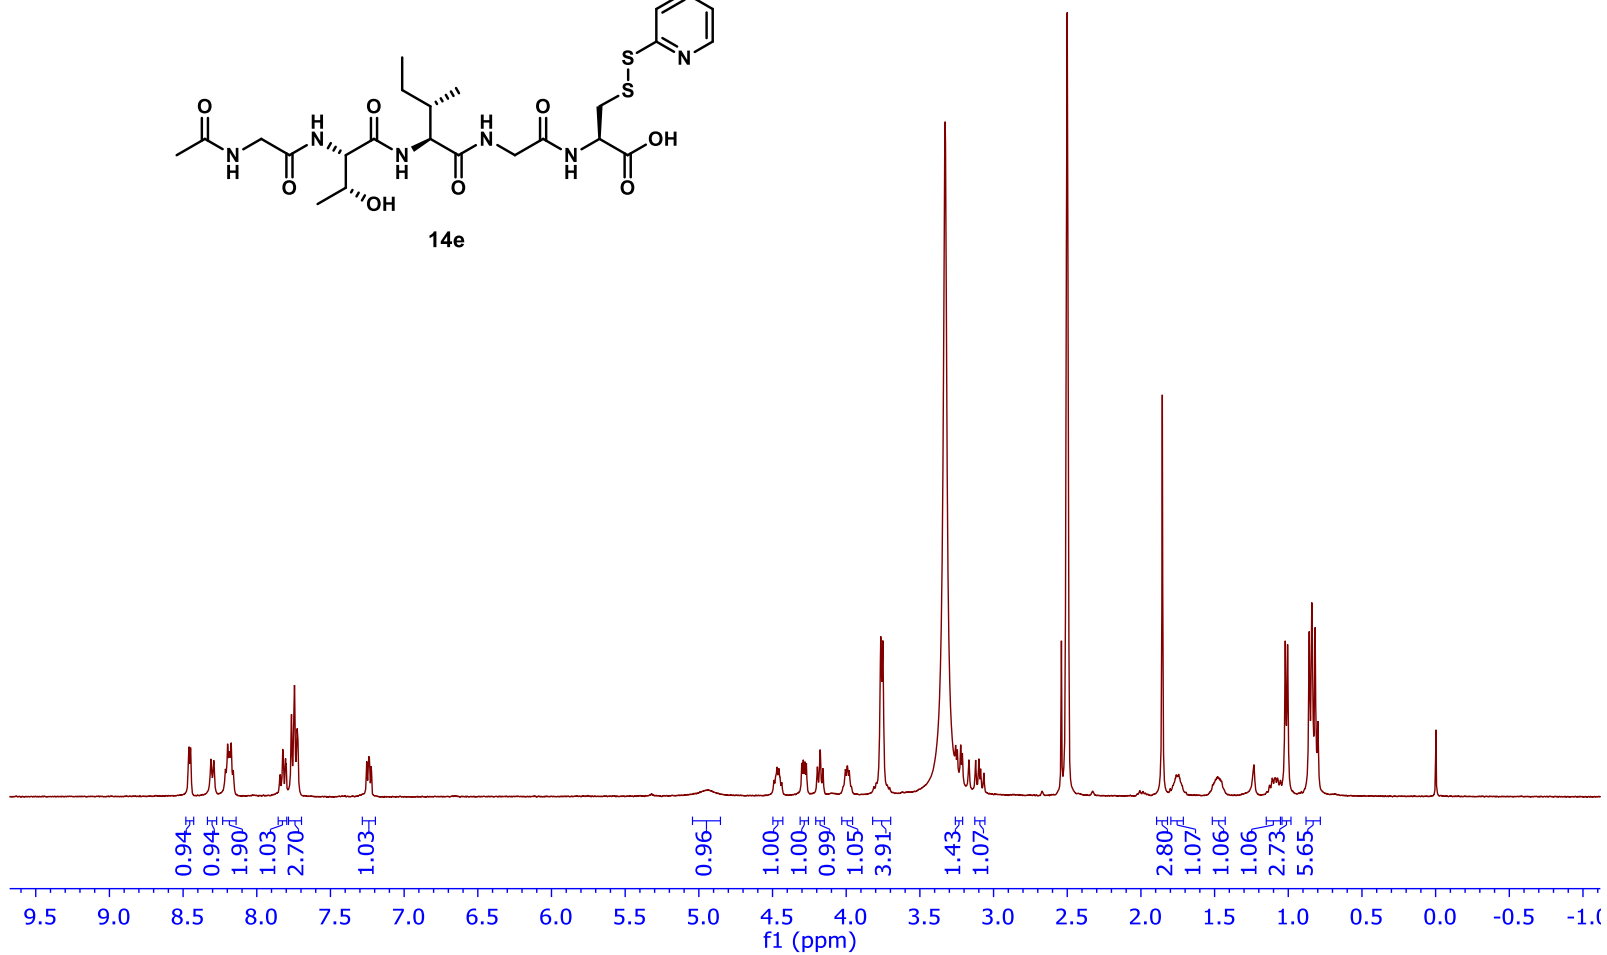

DMSO, 101 MHz

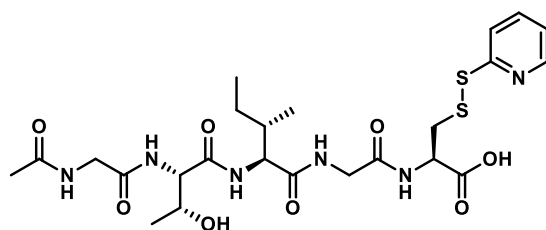

14e

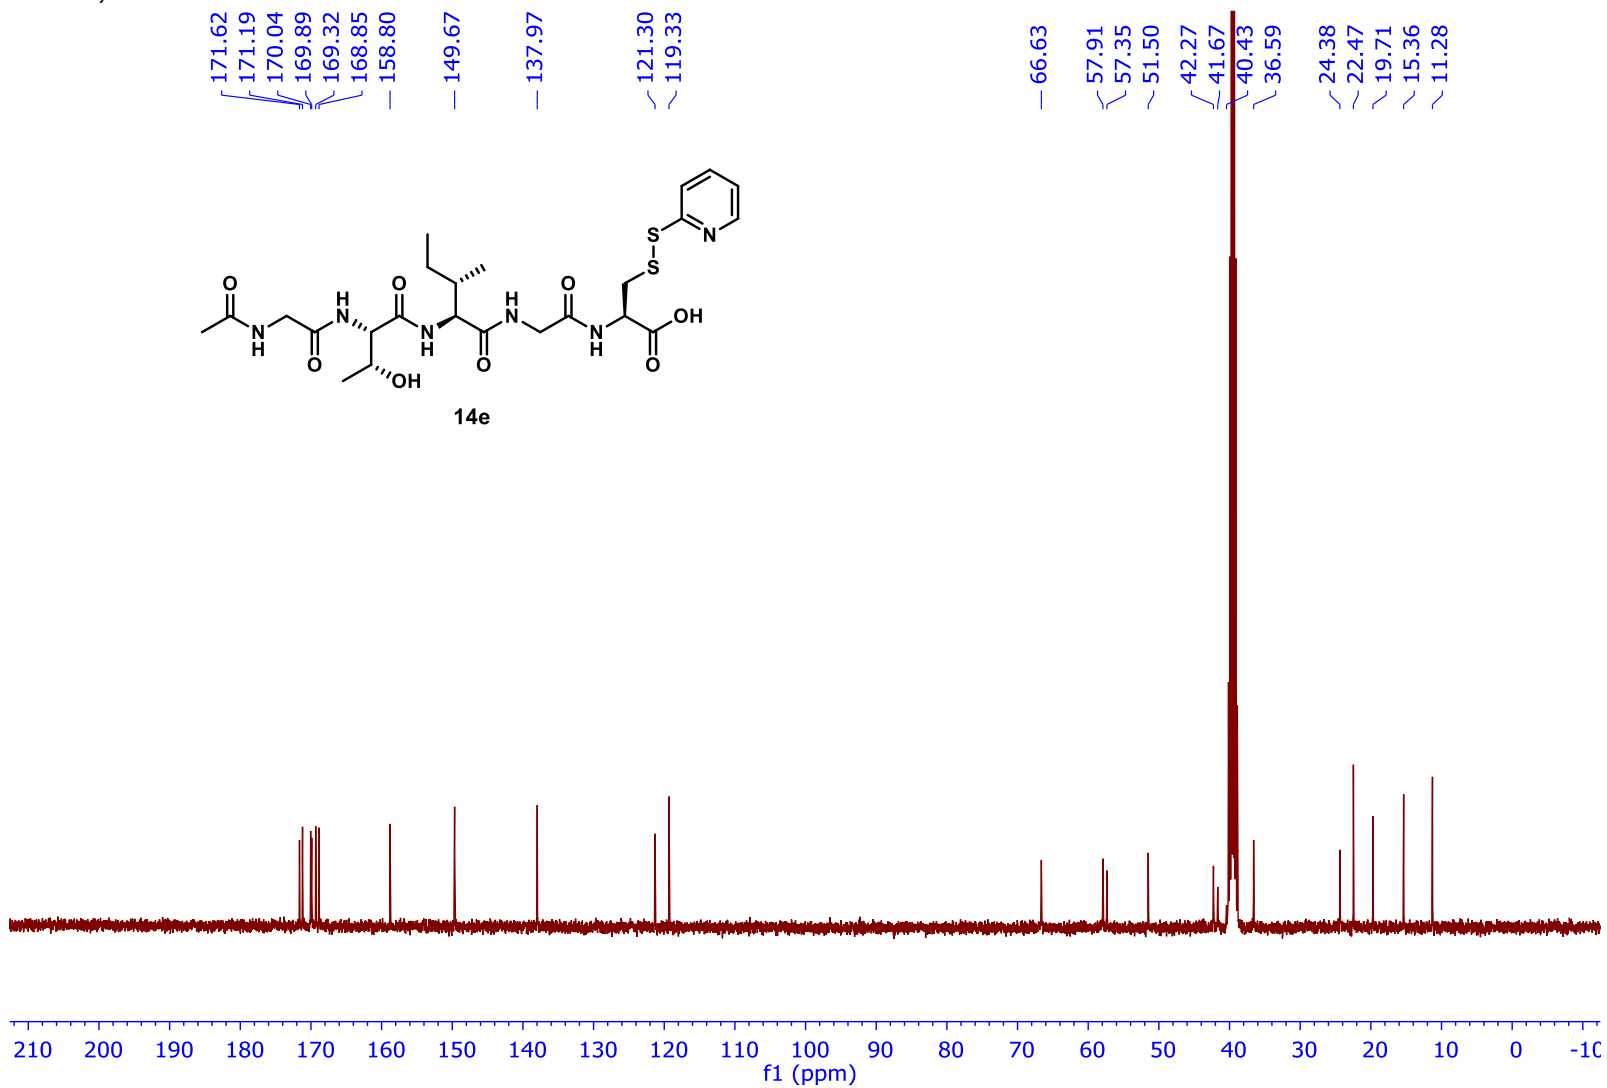

DMSO 400 MHz

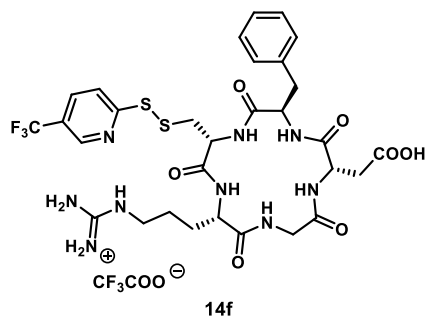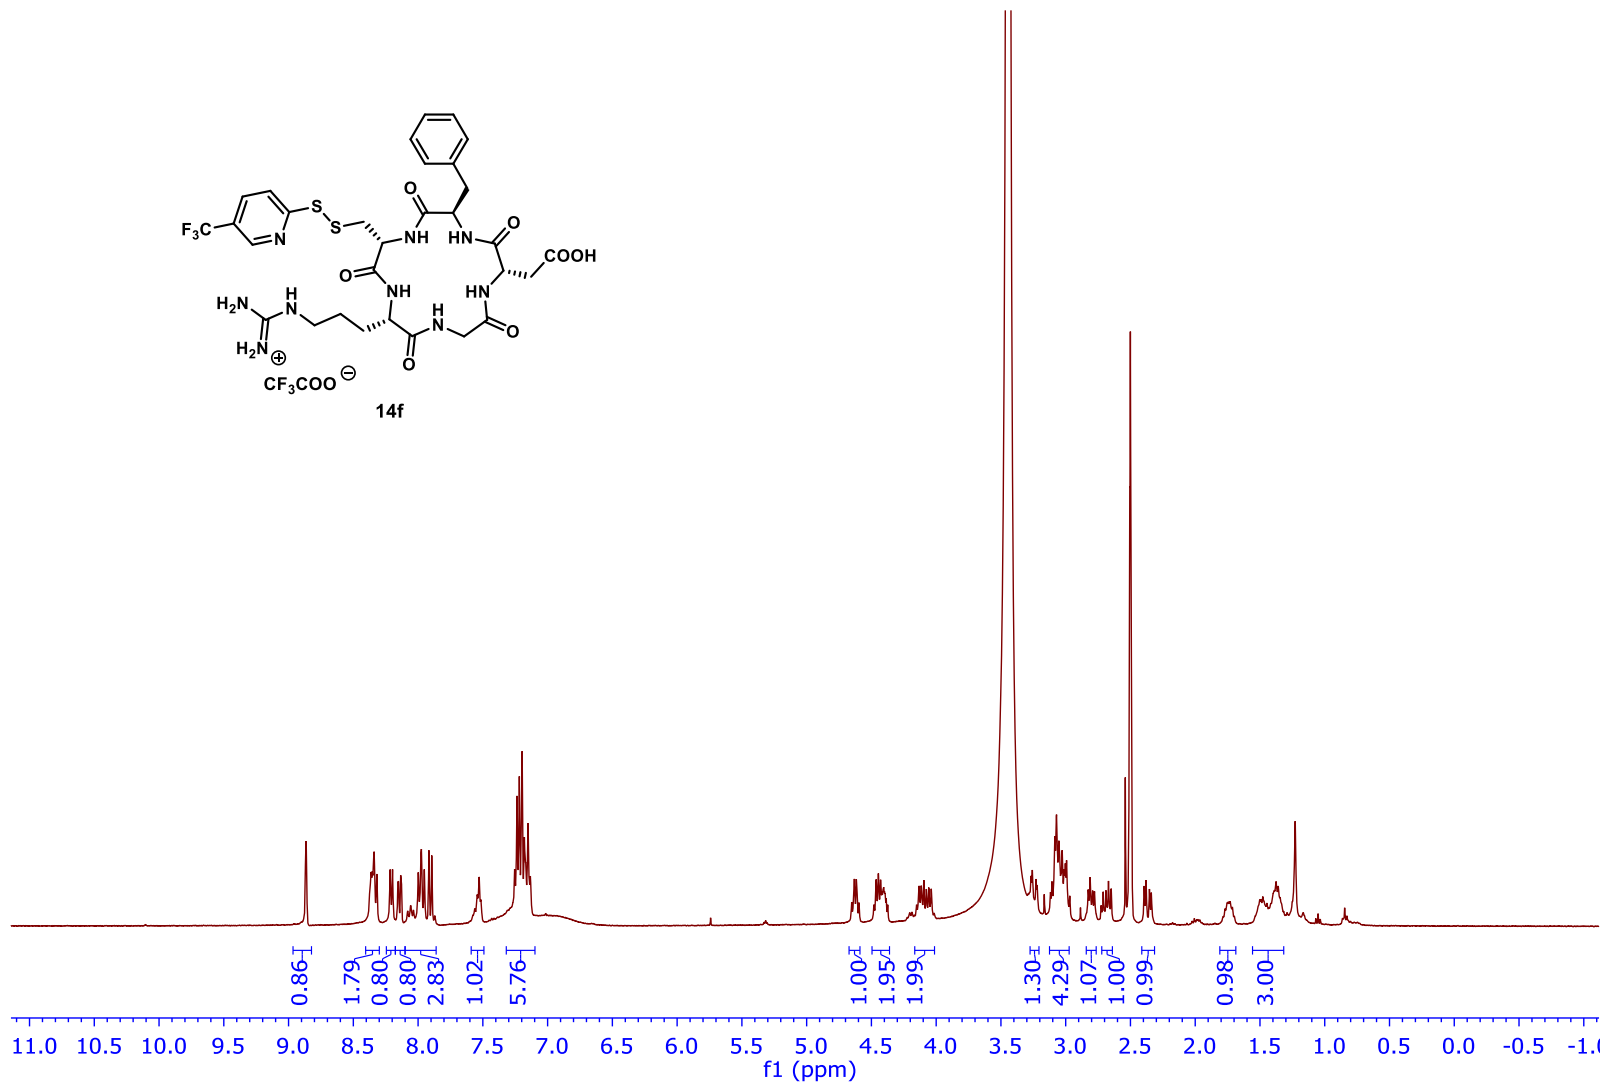

DMSO 101 MHz

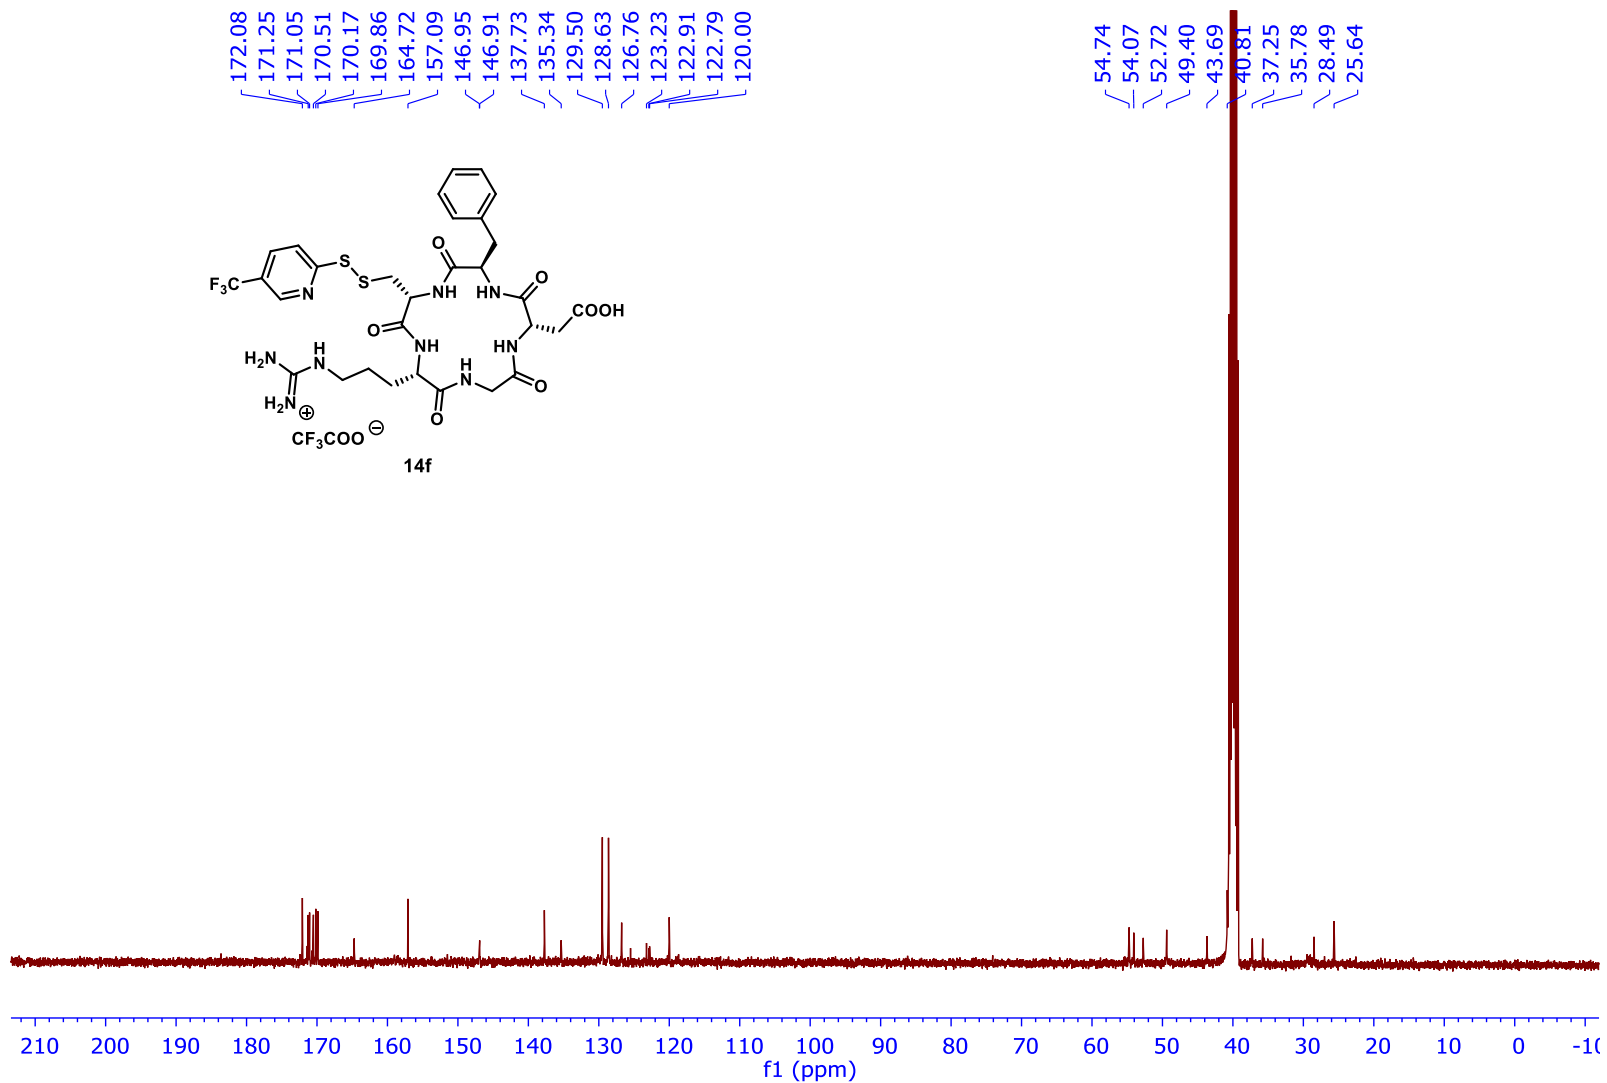

DMSO 376 MHz

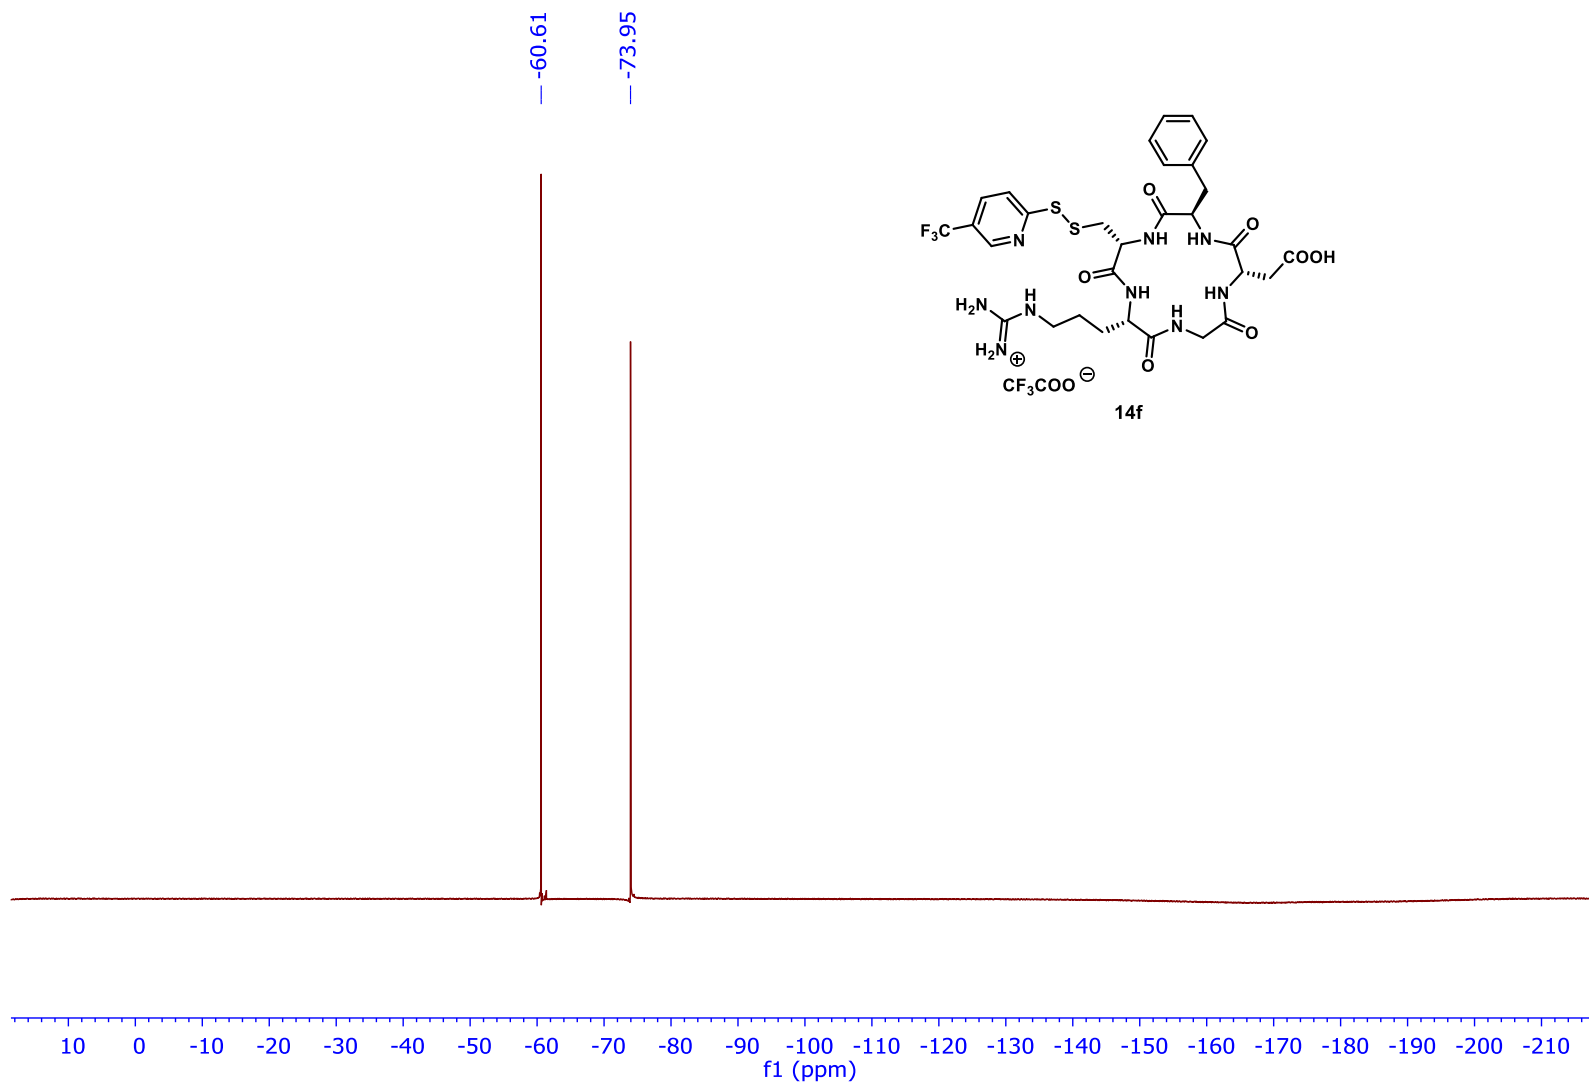

CDCl<sub>3</sub>, 400 MHz

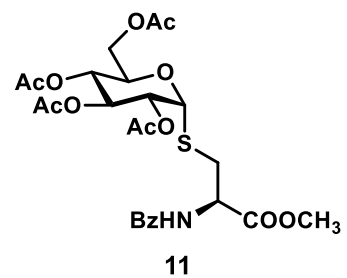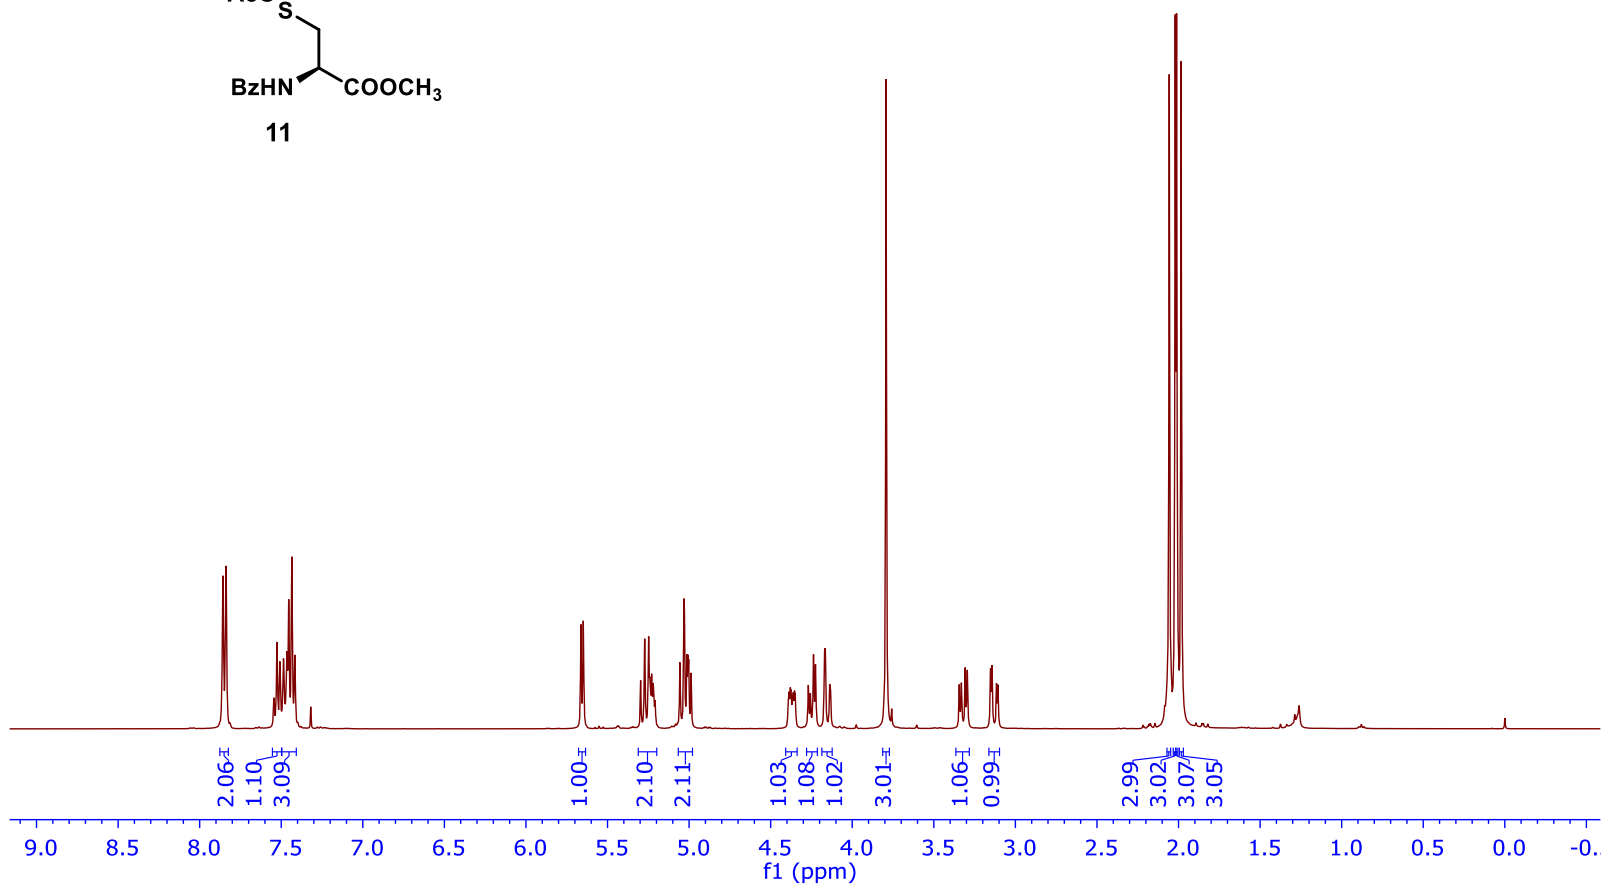

CDCI<sub>3</sub>, 101 MHz

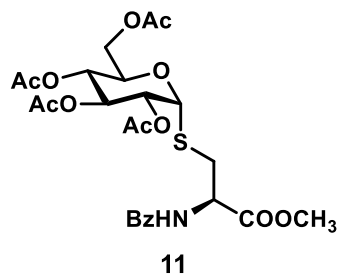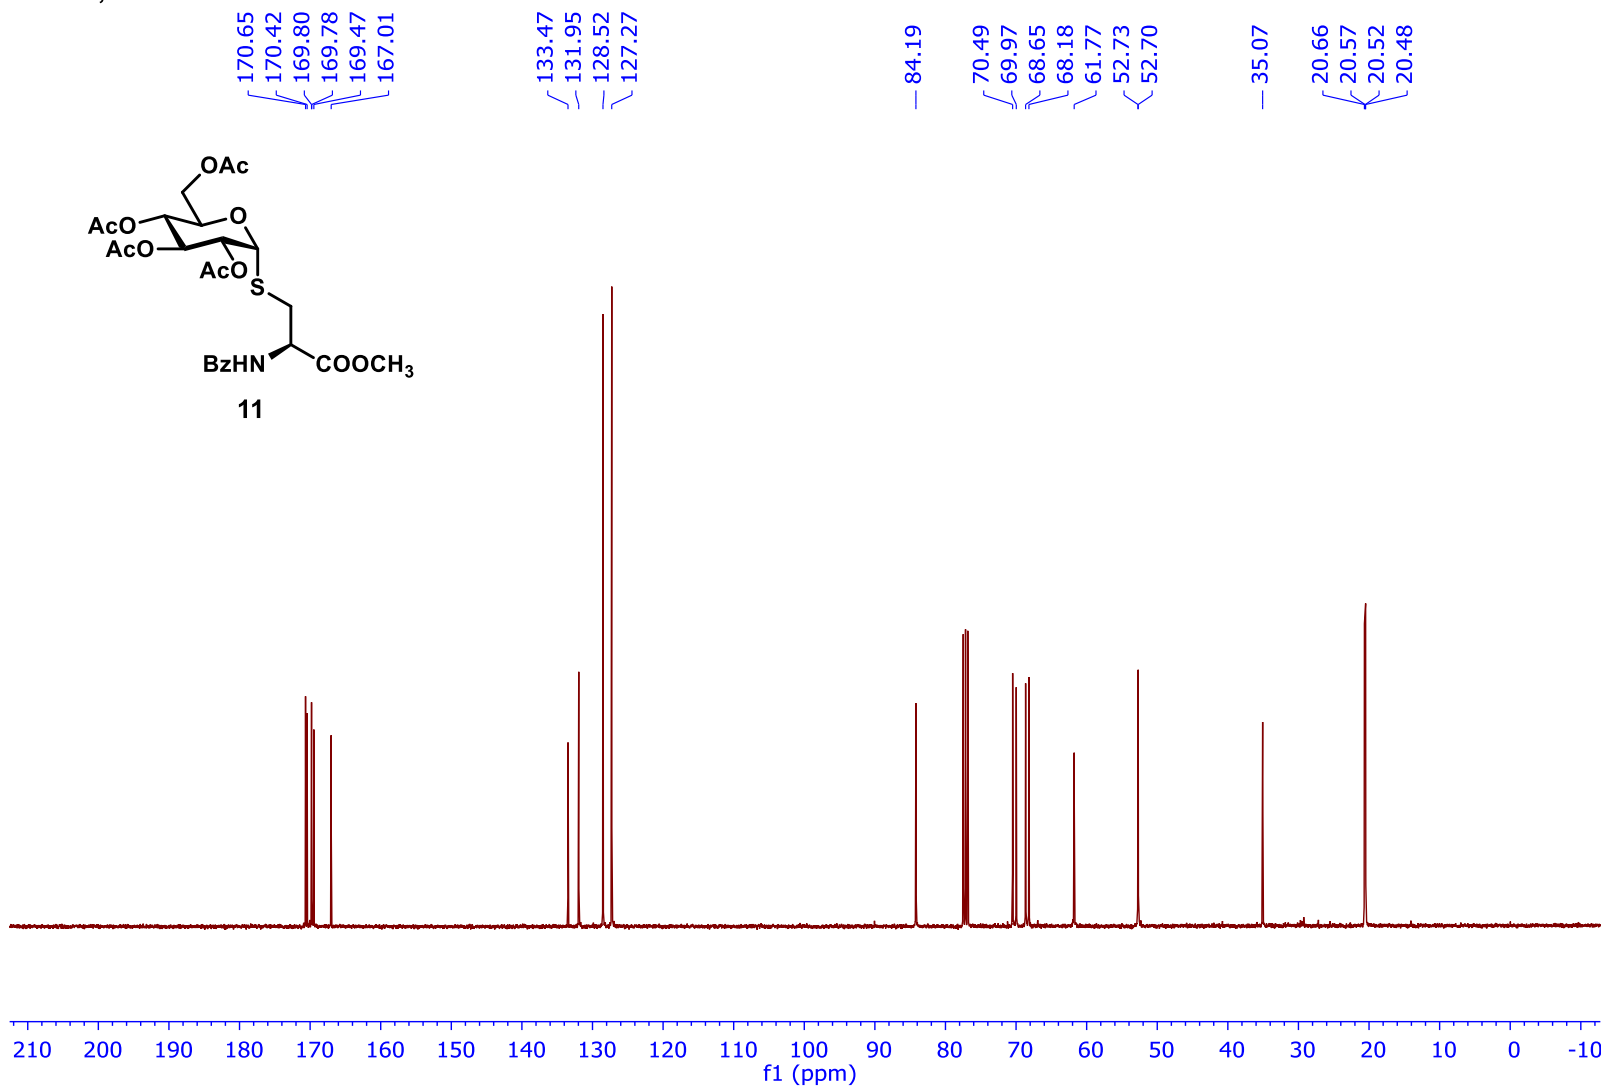

Chemical structure of compound 15a is shown above the spectrum. The structure is a complex molecule featuring a pyranose ring (sugar moiety) linked via a sulfonamide group to a chain containing a secondary amide, a tertiary amine, and a carboxylic acid group. The spectrum displays the <sup>1</sup>H NMR data for compound 15a in DMSO-d<sub>6</sub>. The x-axis represents the chemical shift in ppm (f1), ranging from -0.5 to 7.5. The spectrum shows several distinct signals, including a broad peak around 10.5 ppm (likely the carboxylic acid proton), a sharp peak at 8.1 ppm (likely the sulfonamide proton), and multiple peaks in the aliphatic region between 1.0 and 4.5 ppm. Integration values are provided below the baseline for various signal groups.

| Chemical Shift Range (ppm) | Integration Value |
|----------------------------|-------------------|
| ~5.5                       | 1.00              |
| ~4.5                       | 0.97              |
| ~4.2                       | 1.11              |
| ~3.8                       | 3.31              |
| ~3.5                       | 2.03              |
| ~3.2                       | 1.17              |
| ~2.8                       | 1.93              |
| ~2.5                       | 1.01              |
| ~2.2                       | 1.90              |
| ~1.8                       | 1.07              |
| ~1.5                       | 0.94              |
| ~1.2                       | 4.35              |
| ~0.8                       | 0.86              |
| ~0.5                       | 2.57              |
| ~0.2                       | 2.84              |
| ~0.1                       | 2.30              |
| ~0.0                       | 1.11              |
| ~-0.1                      | 6.05              |
| ~-0.2                      | 2.37              |
| ~-0.3                      | 3.21              |
| ~-0.4                      | 3.21              |

D2O 151 MHz

174.62  
174.28  
173.50  
173.35  
173.30  
172.05

86.98  
73.66  
72.58  
71.05  
69.56  
61.15  
60.47  
60.24  
54.91  
53.86  
53.32  
52.47  
48.76  
39.74  
39.29  
31.87  
30.45  
29.97  
26.26  
24.39  
24.30  
22.18  
21.97  
21.50  
20.72

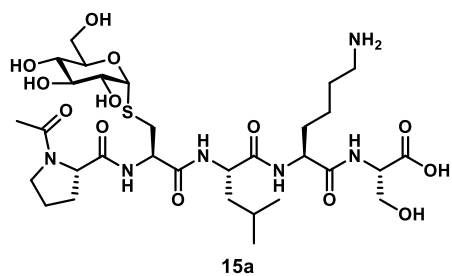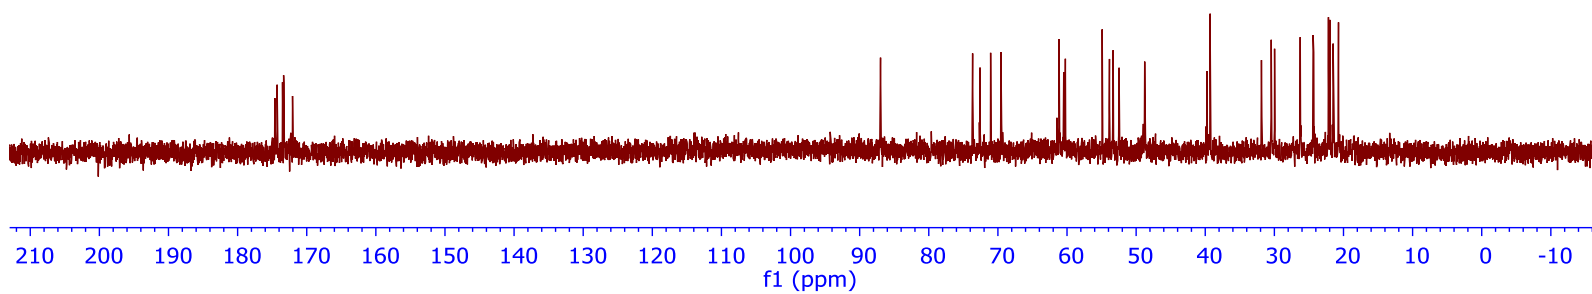

D<sub>2</sub>O, 600 MHz

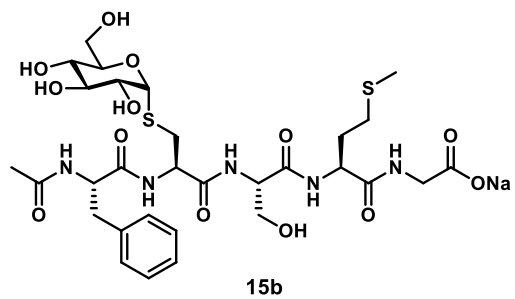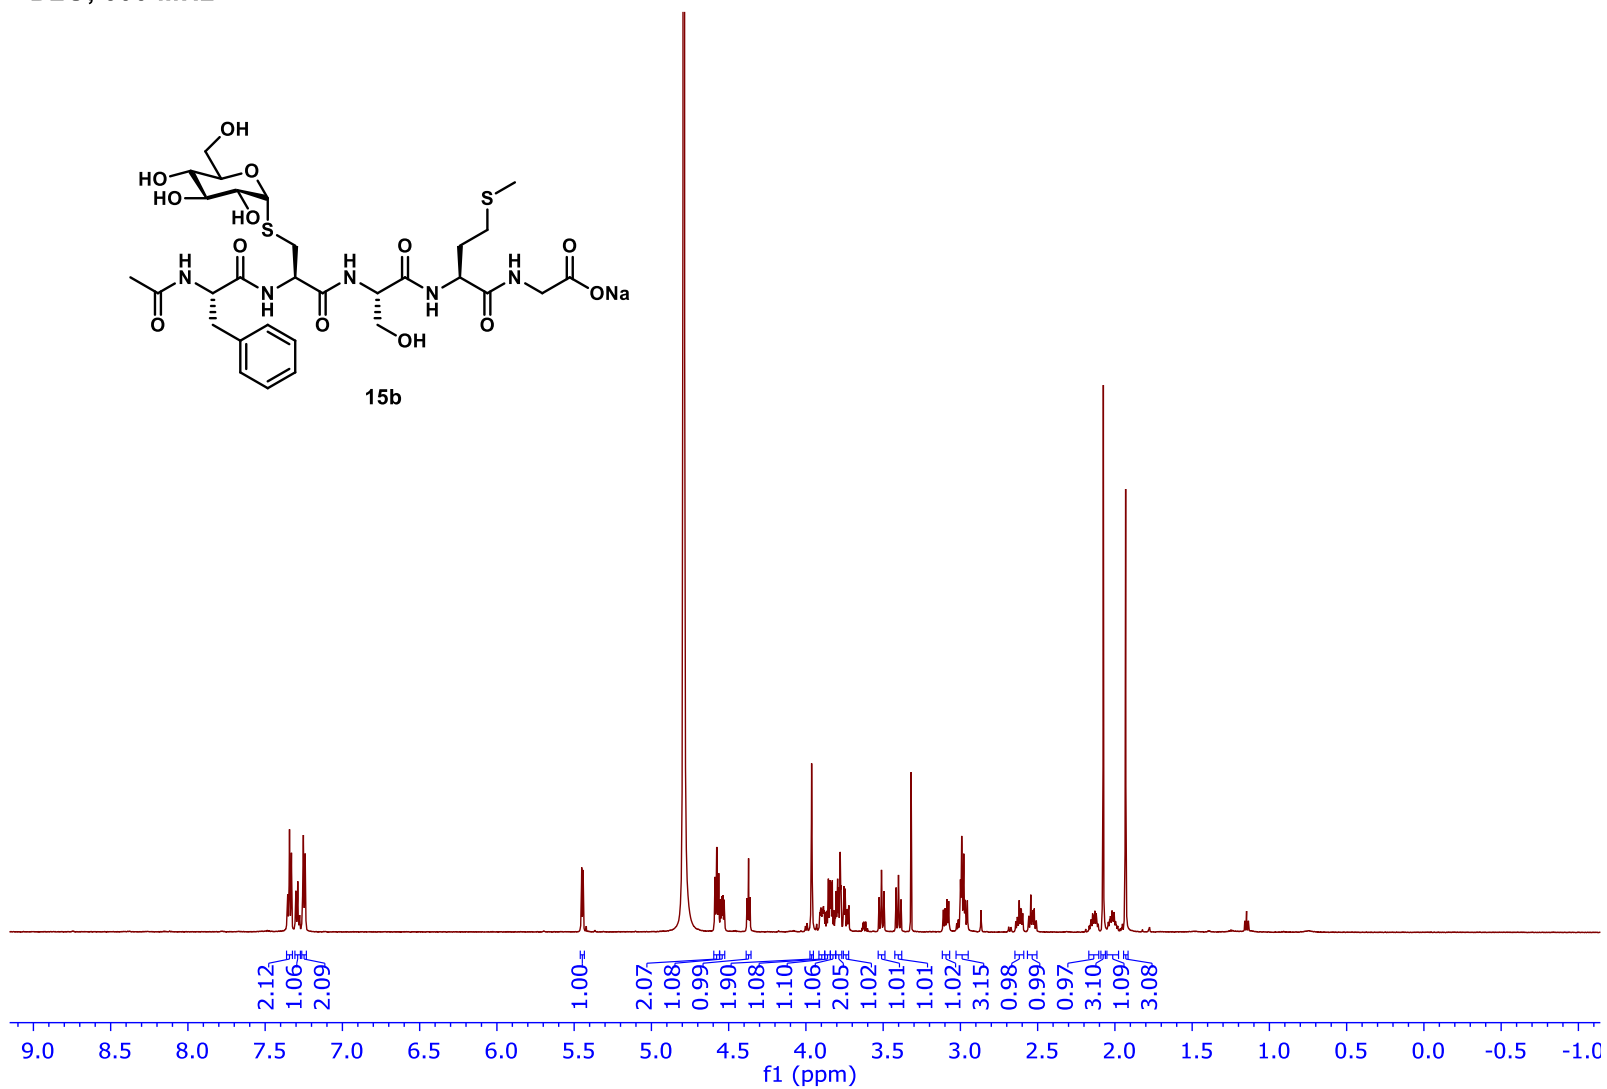

D2O, 151 MHz

174.10  
173.64  
173.29  
173.20  
173.19  
171.76  
171.63

136.38  
129.20  
128.81  
127.22

86.82

73.63  
72.68  
71.02  
69.48  
60.93  
60.45  
55.76  
55.17  
53.68  
52.71  
41.34  
36.99  
32.11  
30.25  
29.34  
21.69  
14.19

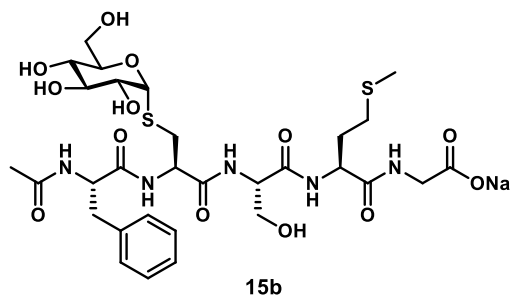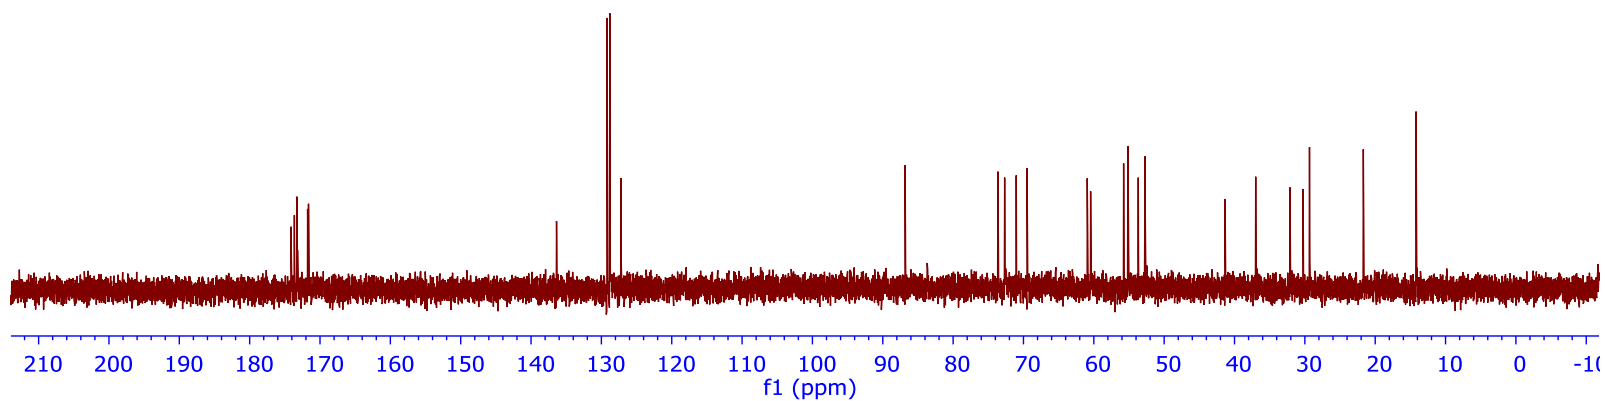

D<sub>2</sub>O, 600 MHz

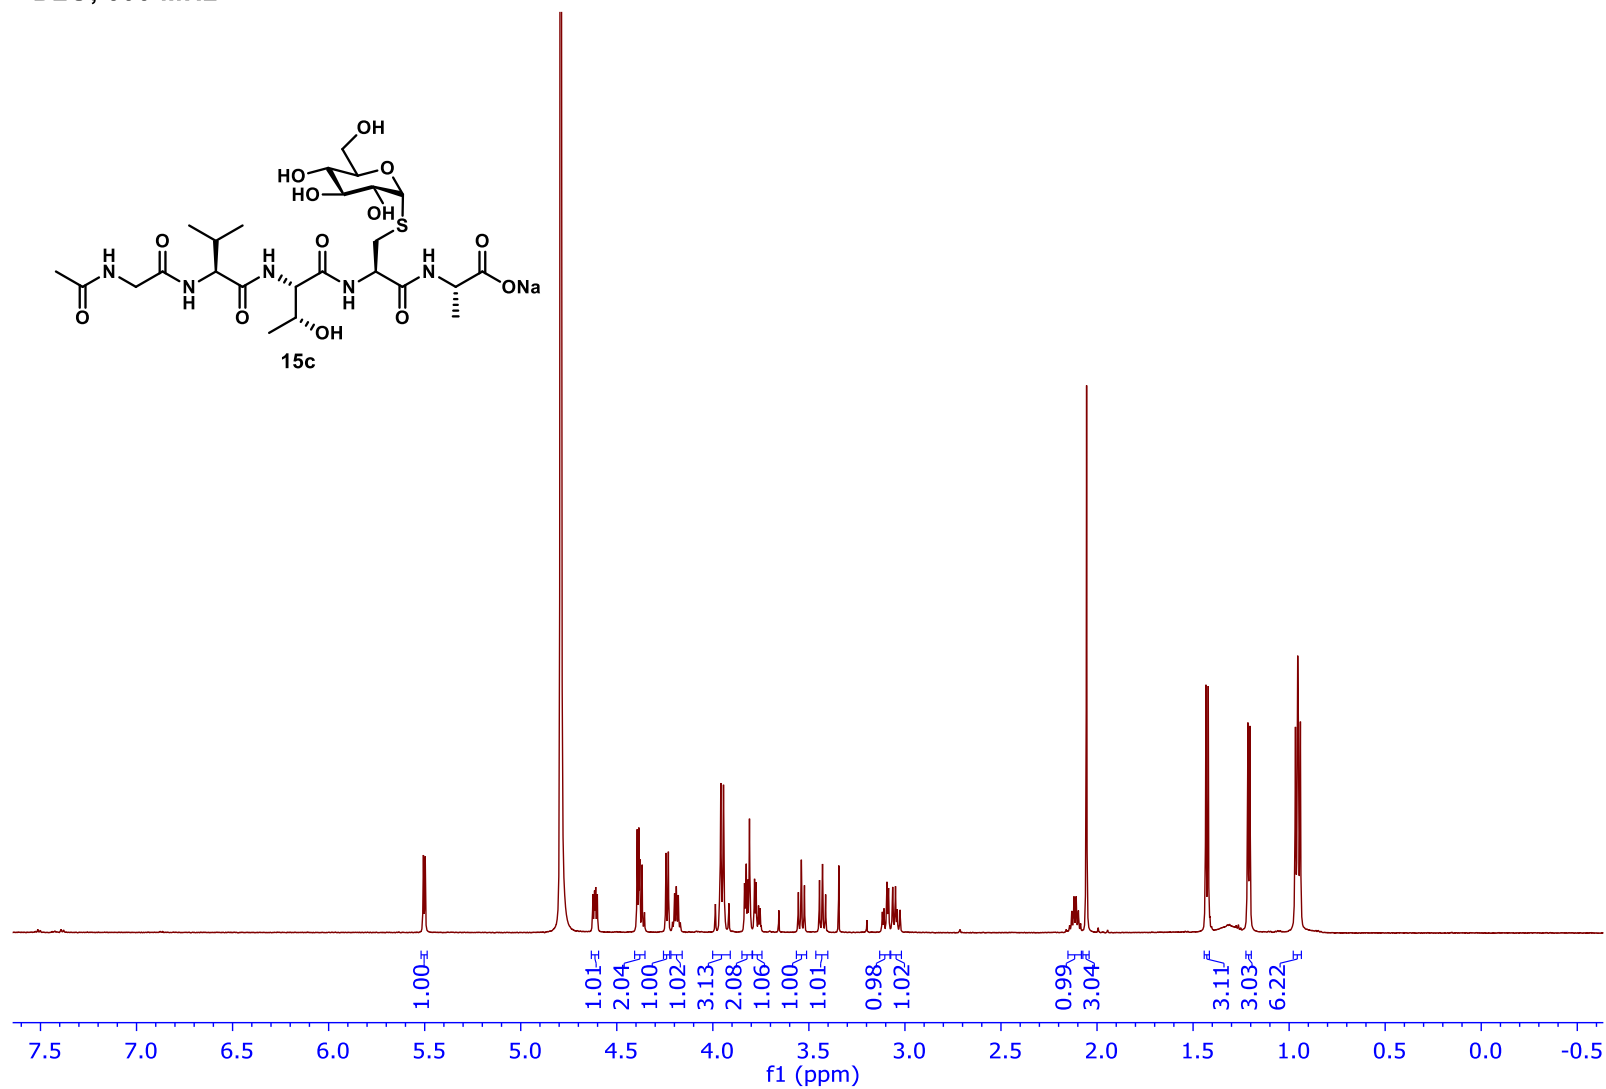

D2O, 151 MHz

176.04  
174.88  
173.83  
171.80  
171.46  
171.45

87.15  
73.62  
72.59  
71.10  
69.53  
67.17  
60.48  
59.52  
59.04  
53.91  
48.81  
42.59  
32.36  
30.22  
21.76  
18.80  
18.57  
17.60  
16.22

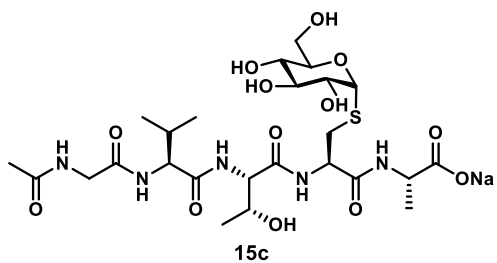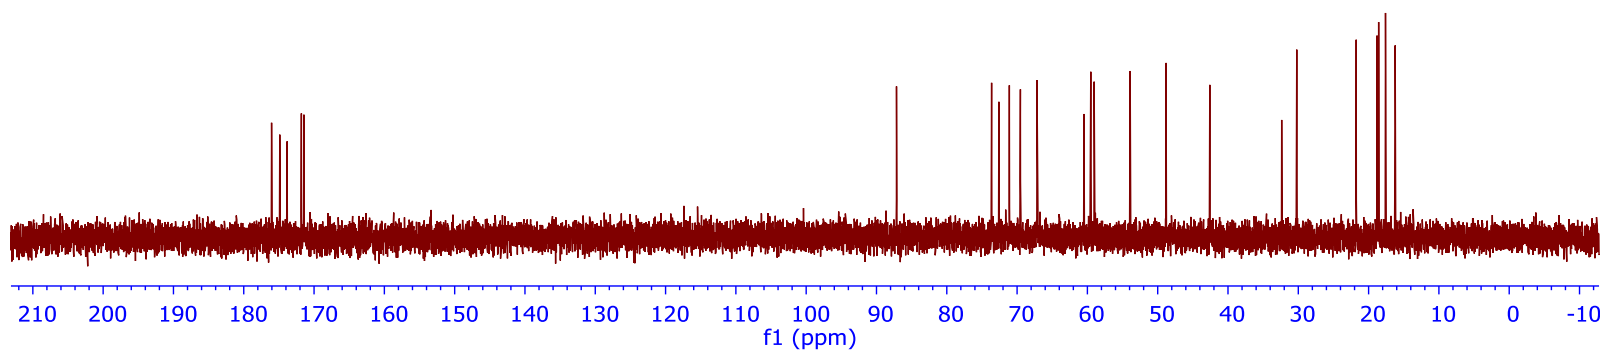

D<sub>2</sub>O, 600 MHz

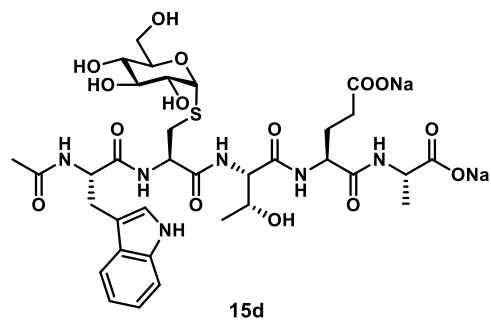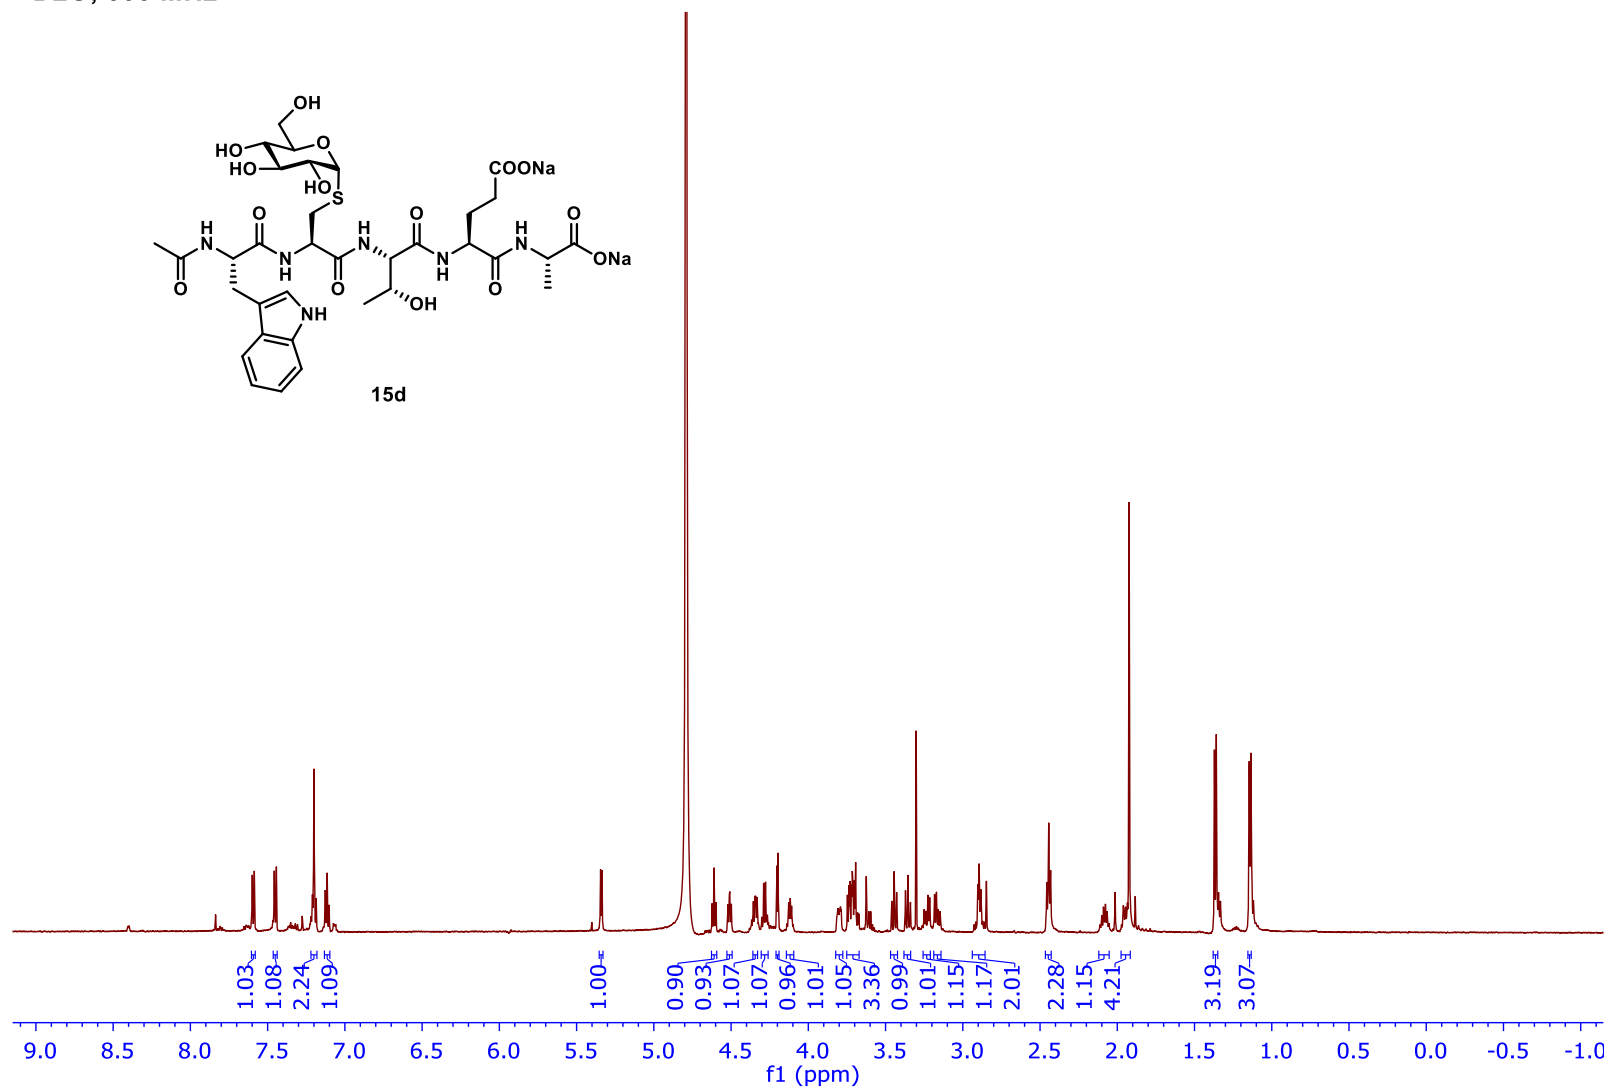

D2O 151 MHz

176.99  
174.01  
173.50  
172.51  
171.65  
171.34

136.07  
126.77  
124.28  
121.87  
119.23  
118.19  
111.80  
108.71

86.74  
73.43  
72.48  
70.85  
69.28  
66.81  
60.23  
59.13  
54.62  
53.56  
52.68  
48.78

32.08  
29.69  
26.84  
26.03  
21.59  
18.64  
16.02

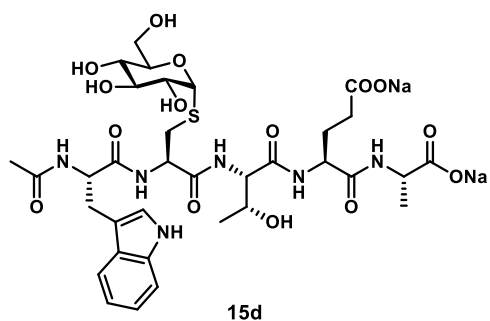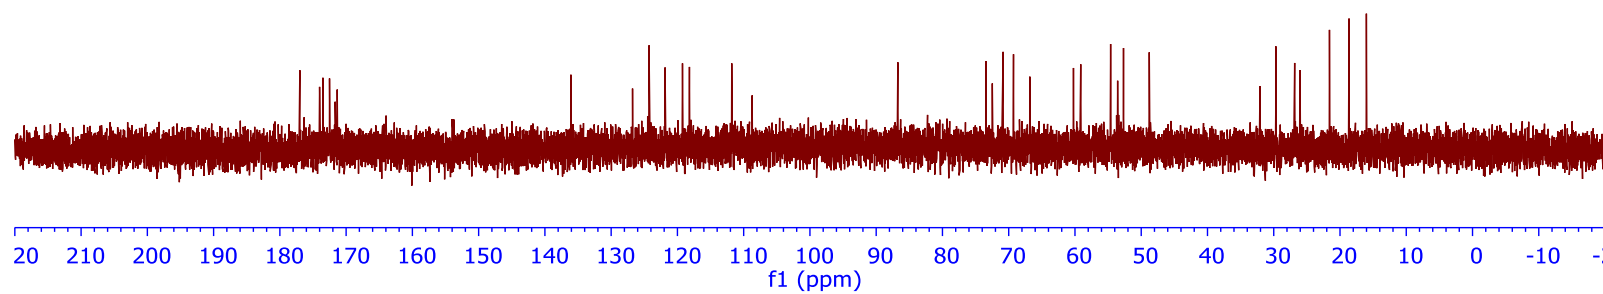

D2O, 600 MHz

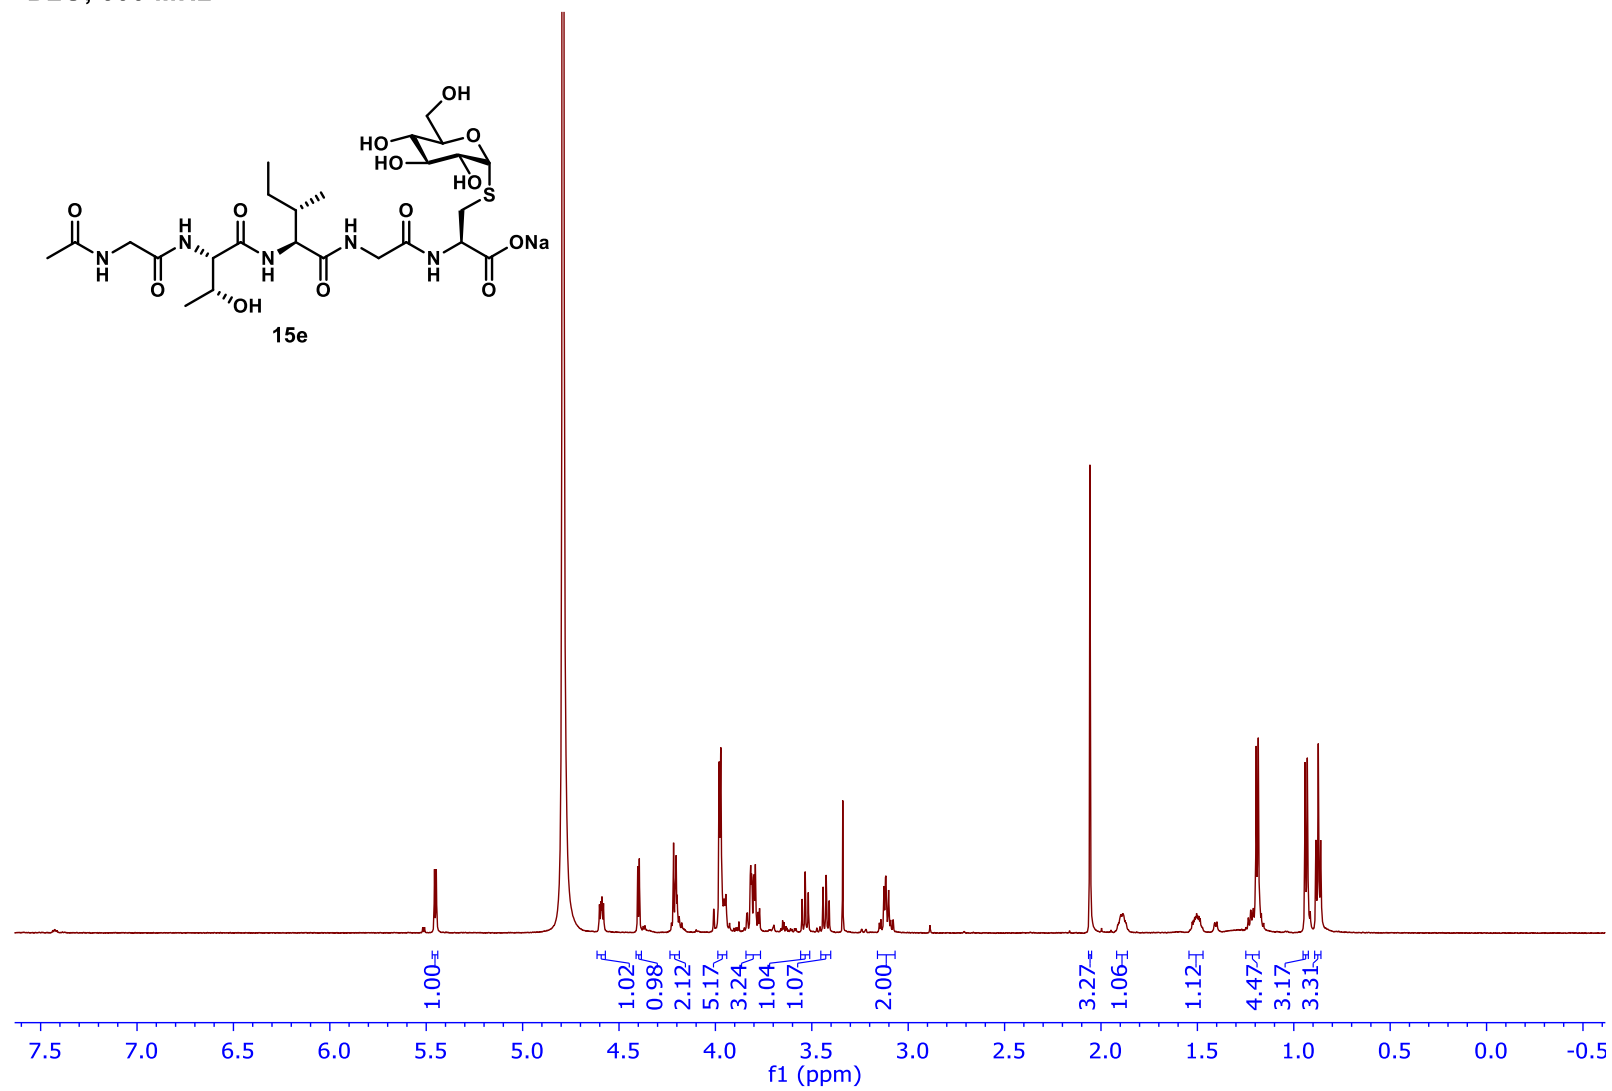

D2O, 151 MHz

174.97  
173.83  
172.00  
171.96  
170.87

87.20  
73.64  
72.53  
71.11  
69.57  
67.13  
60.45  
58.99  
58.64  
54.15  
42.65  
42.43  
36.10  
32.80  
24.67  
21.79  
18.90  
14.79  
10.18

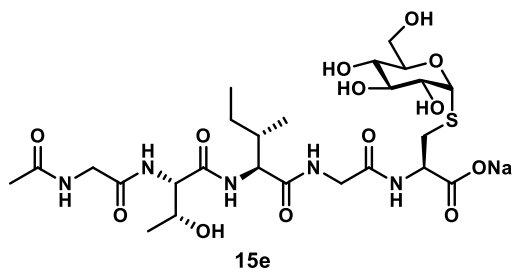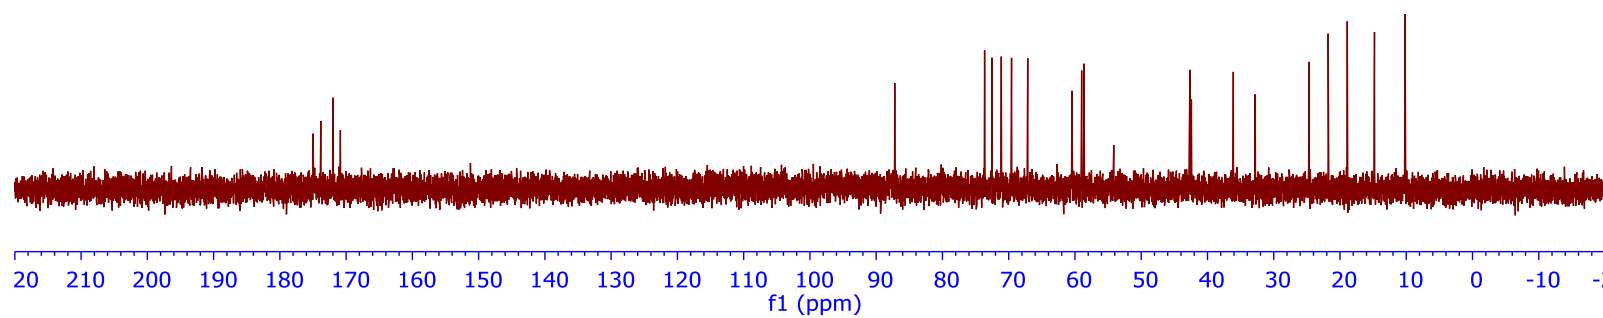

D2O, 800 MHz

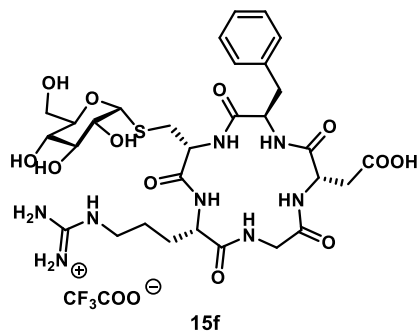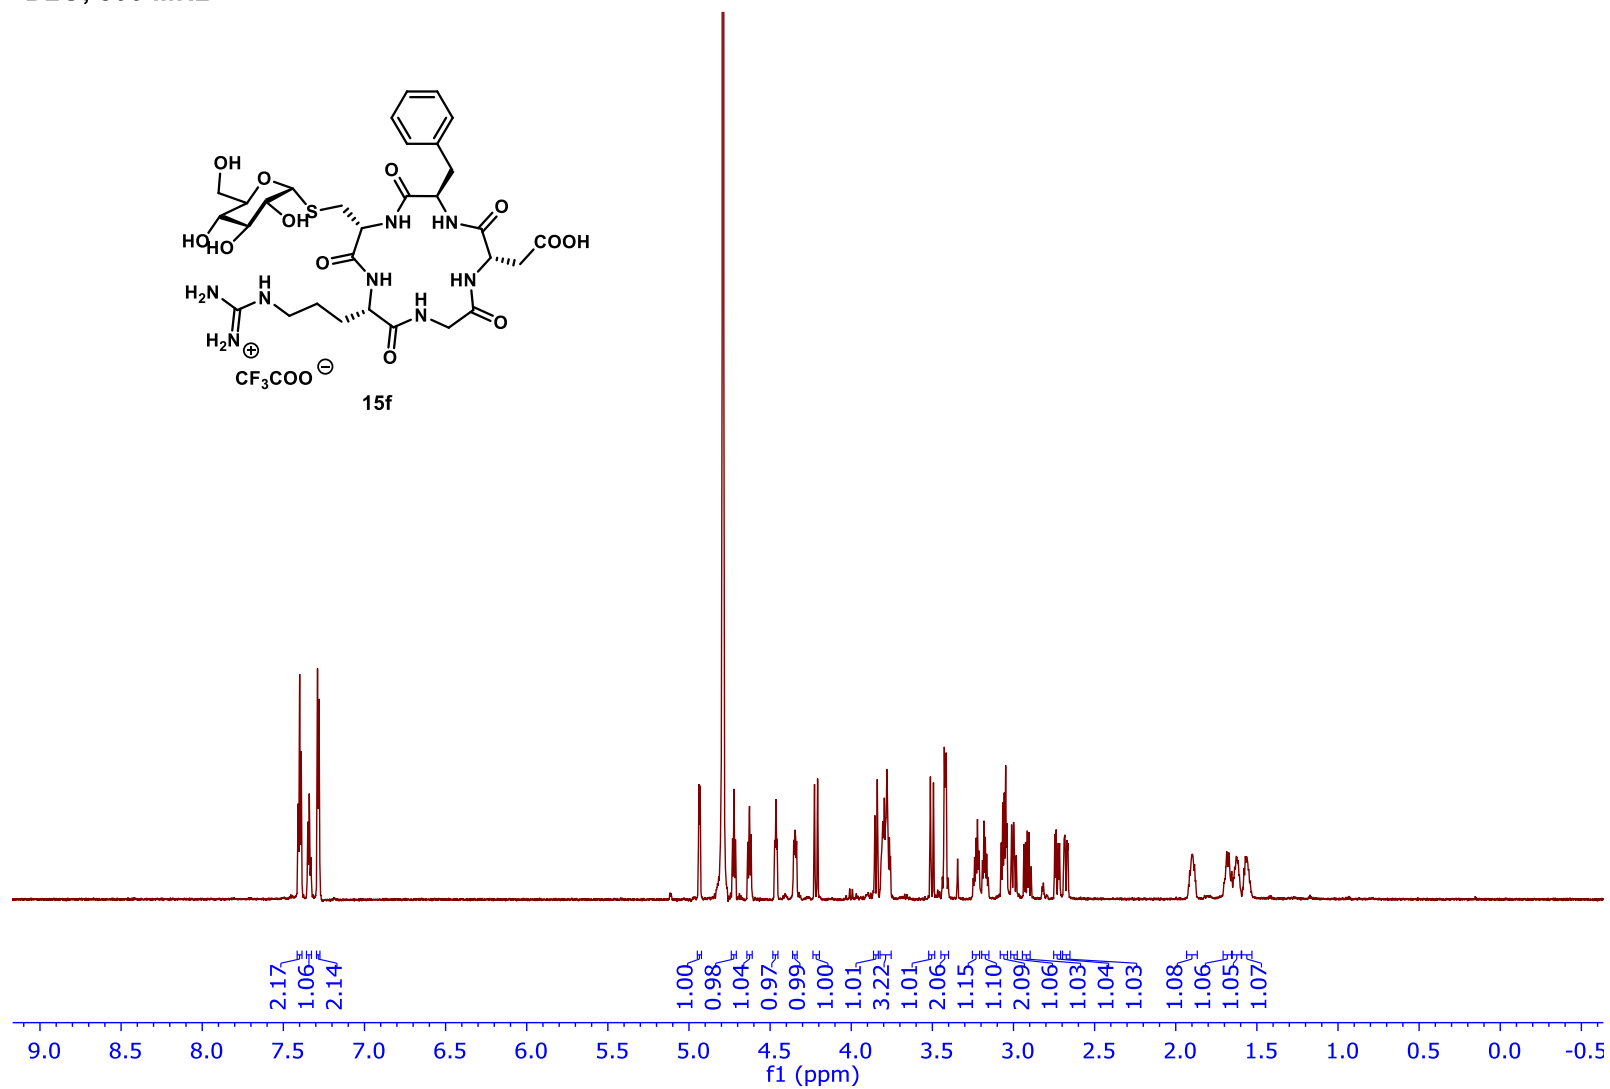

D2O, 201 MHz

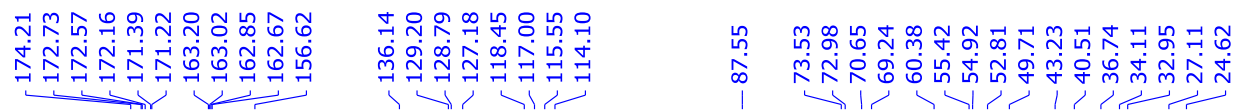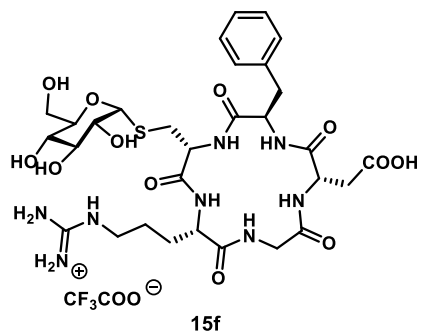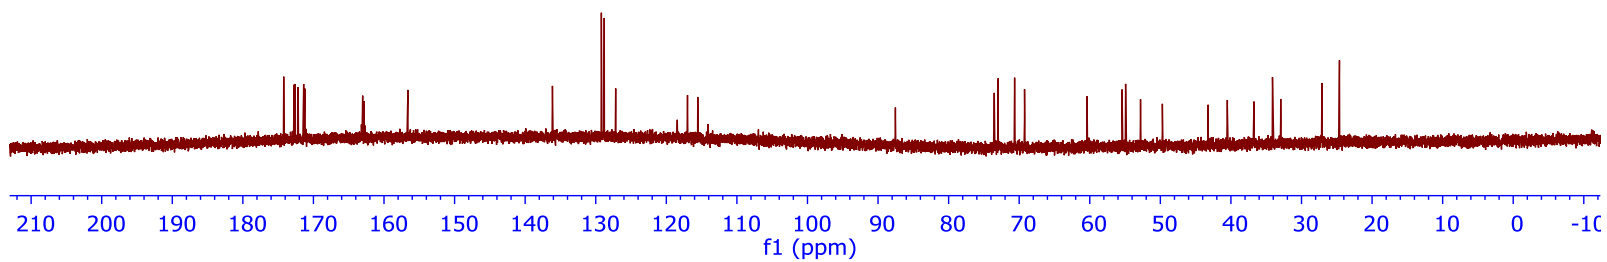

D2O, 376 MHz

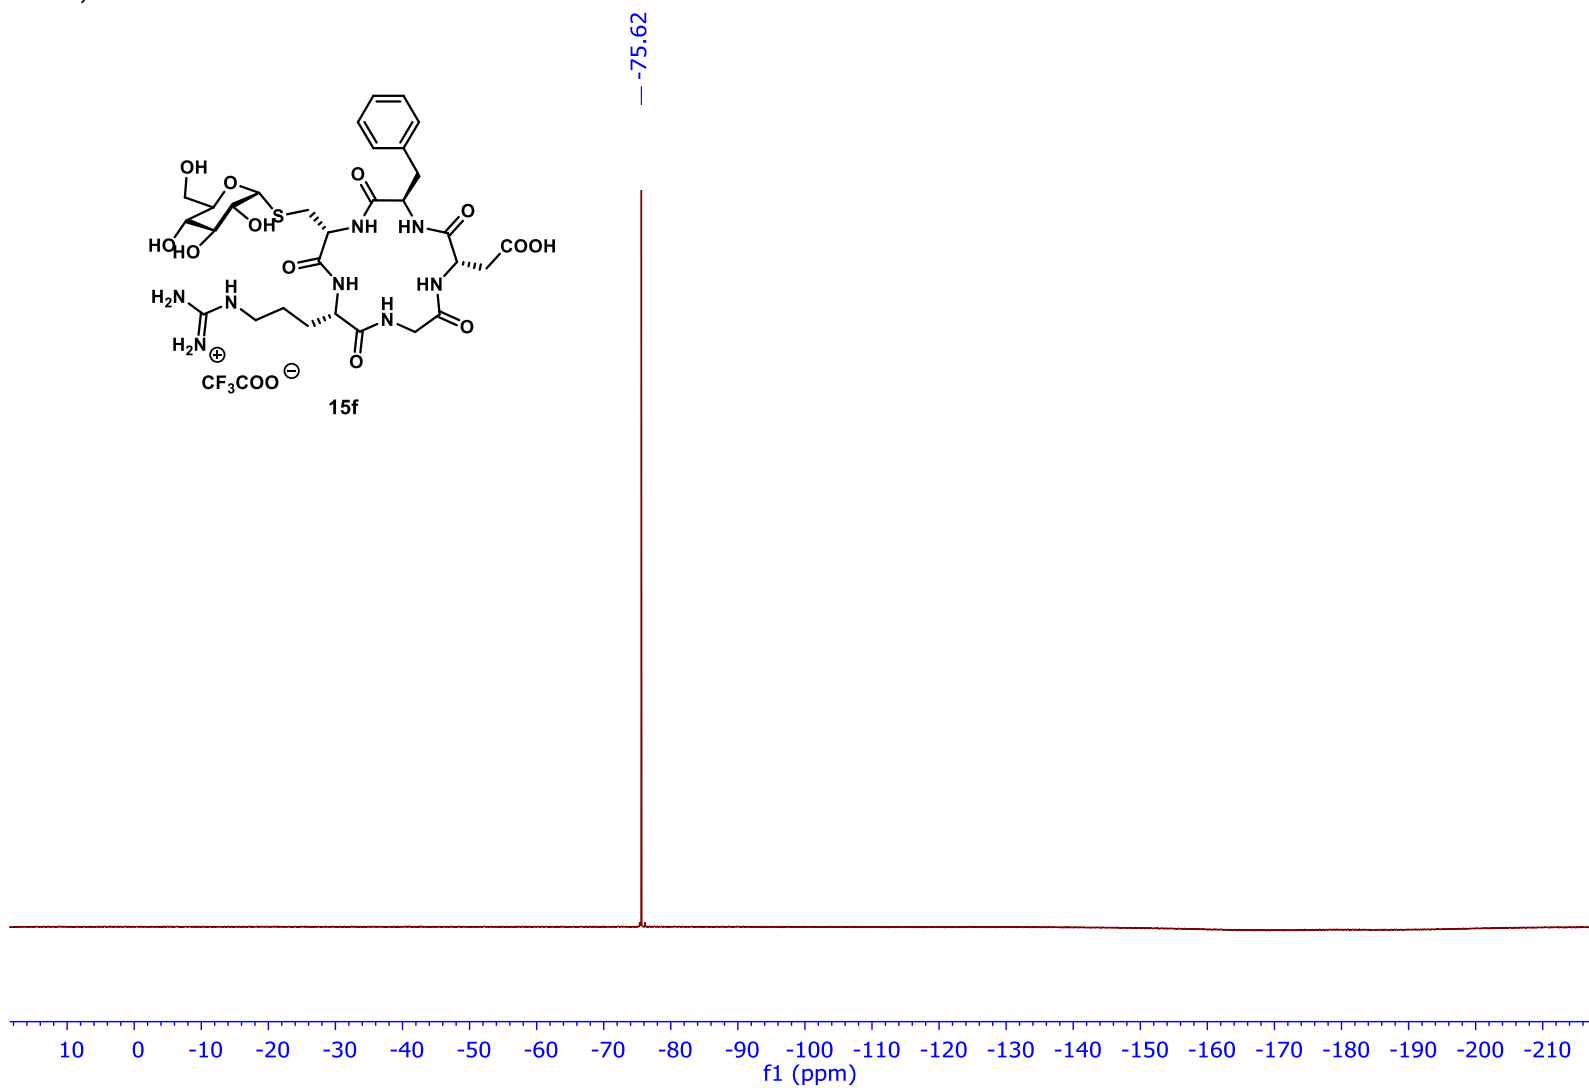

D2O, 400 MHz

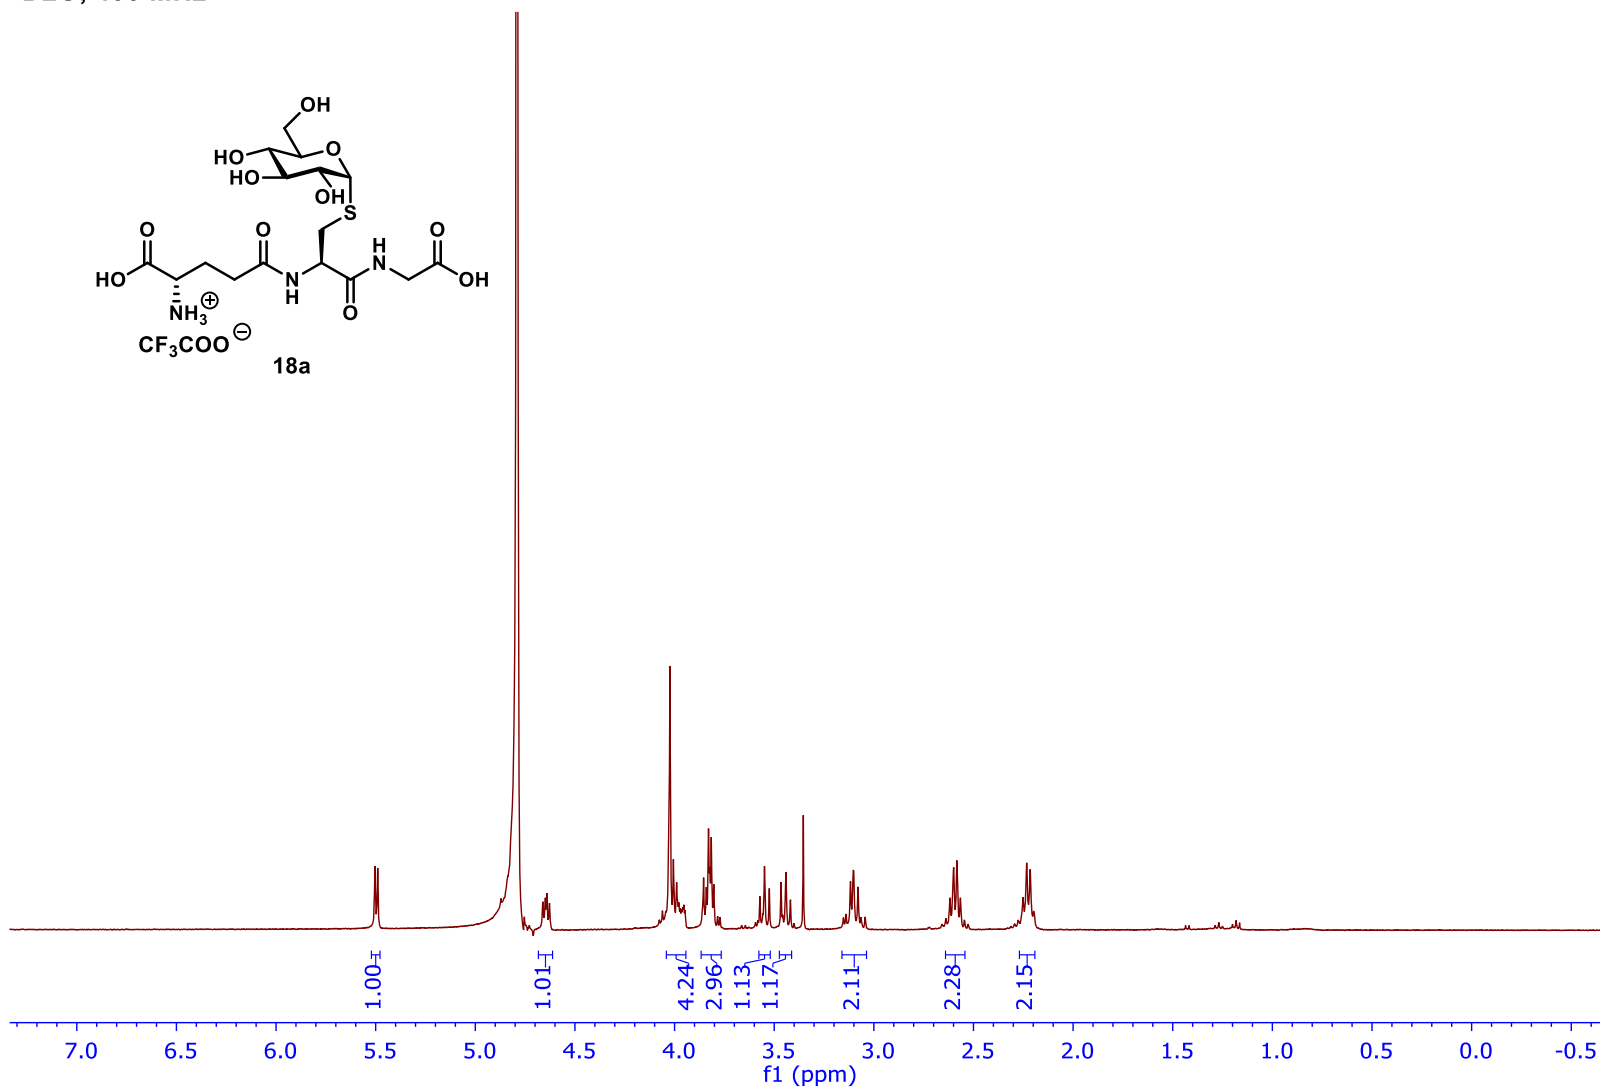

D2O 101 MHz

174.42  
172.94  
172.69  
172.21

87.10

73.47

72.53

70.91

69.36

60.28

53.92

52.72

41.12

32.44

30.99

25.63

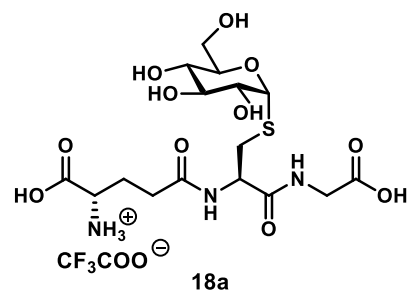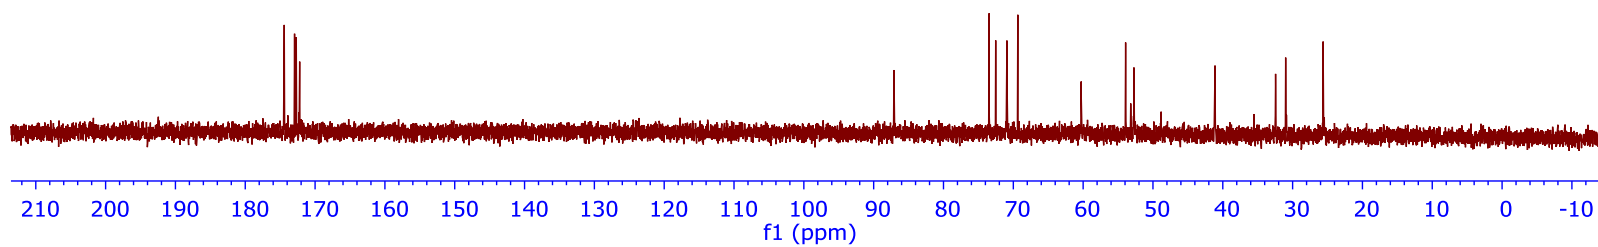

D2O, 376 MHz

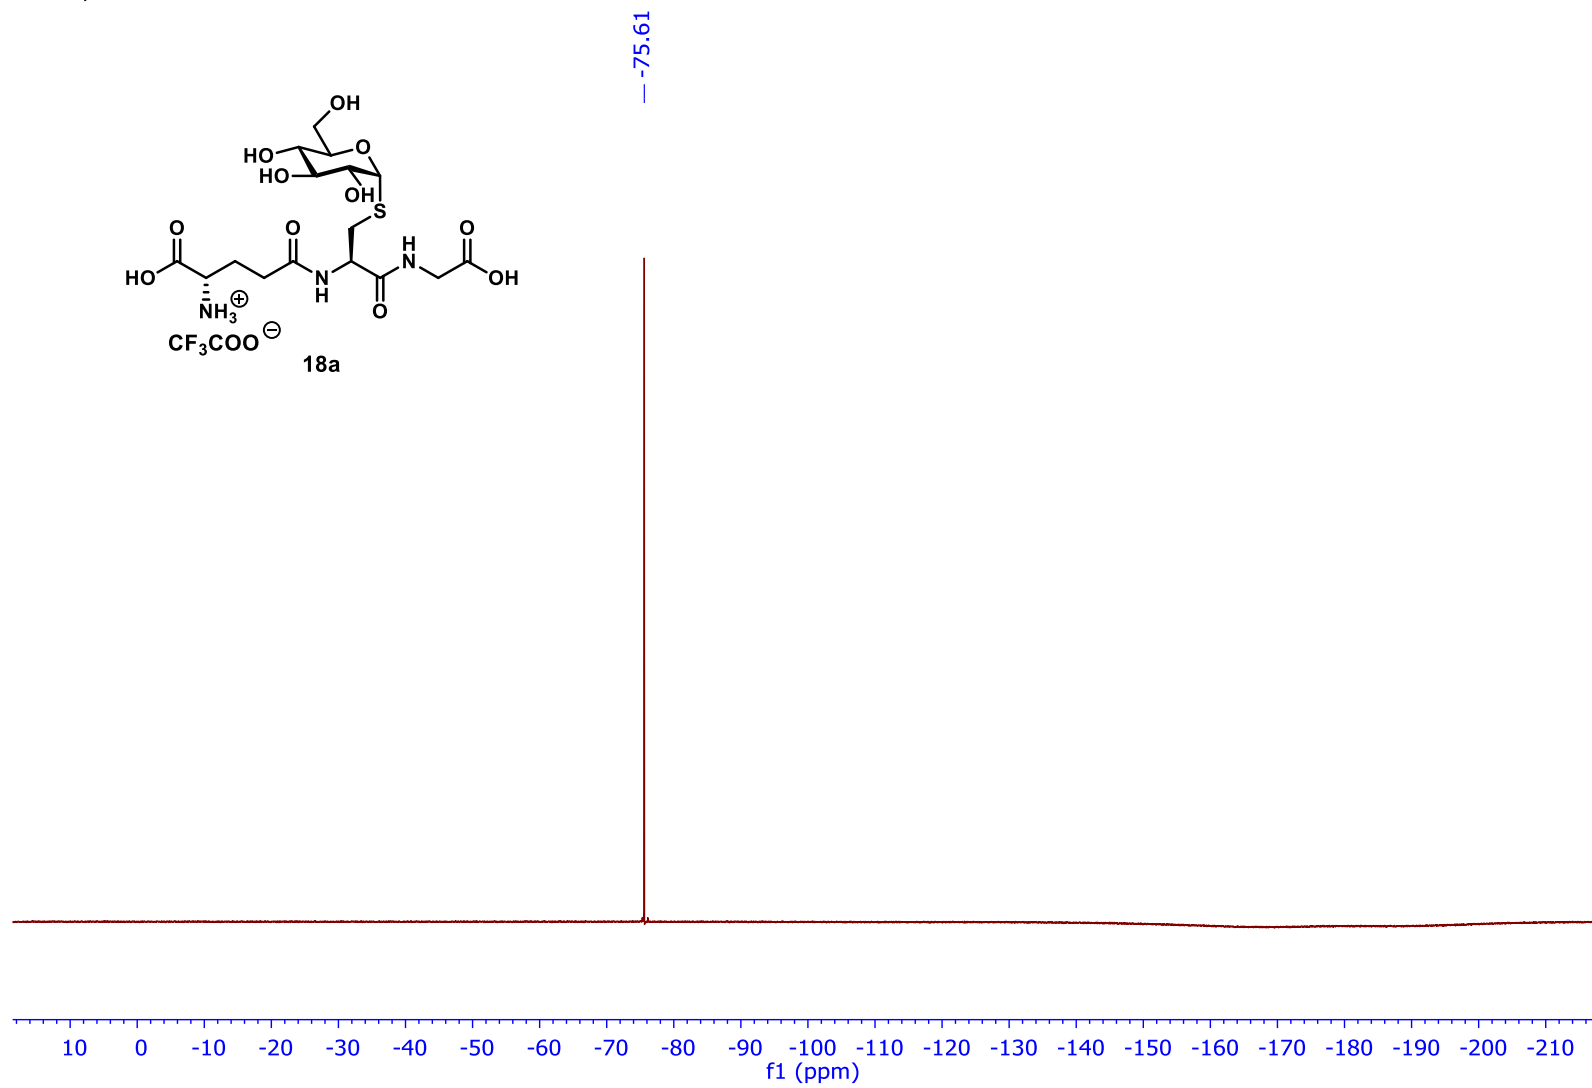

D2O, 400 MHz

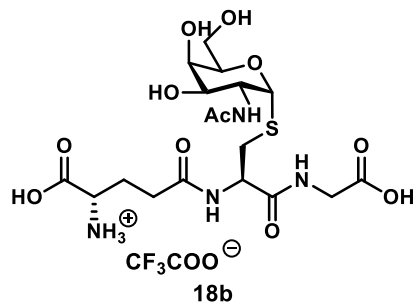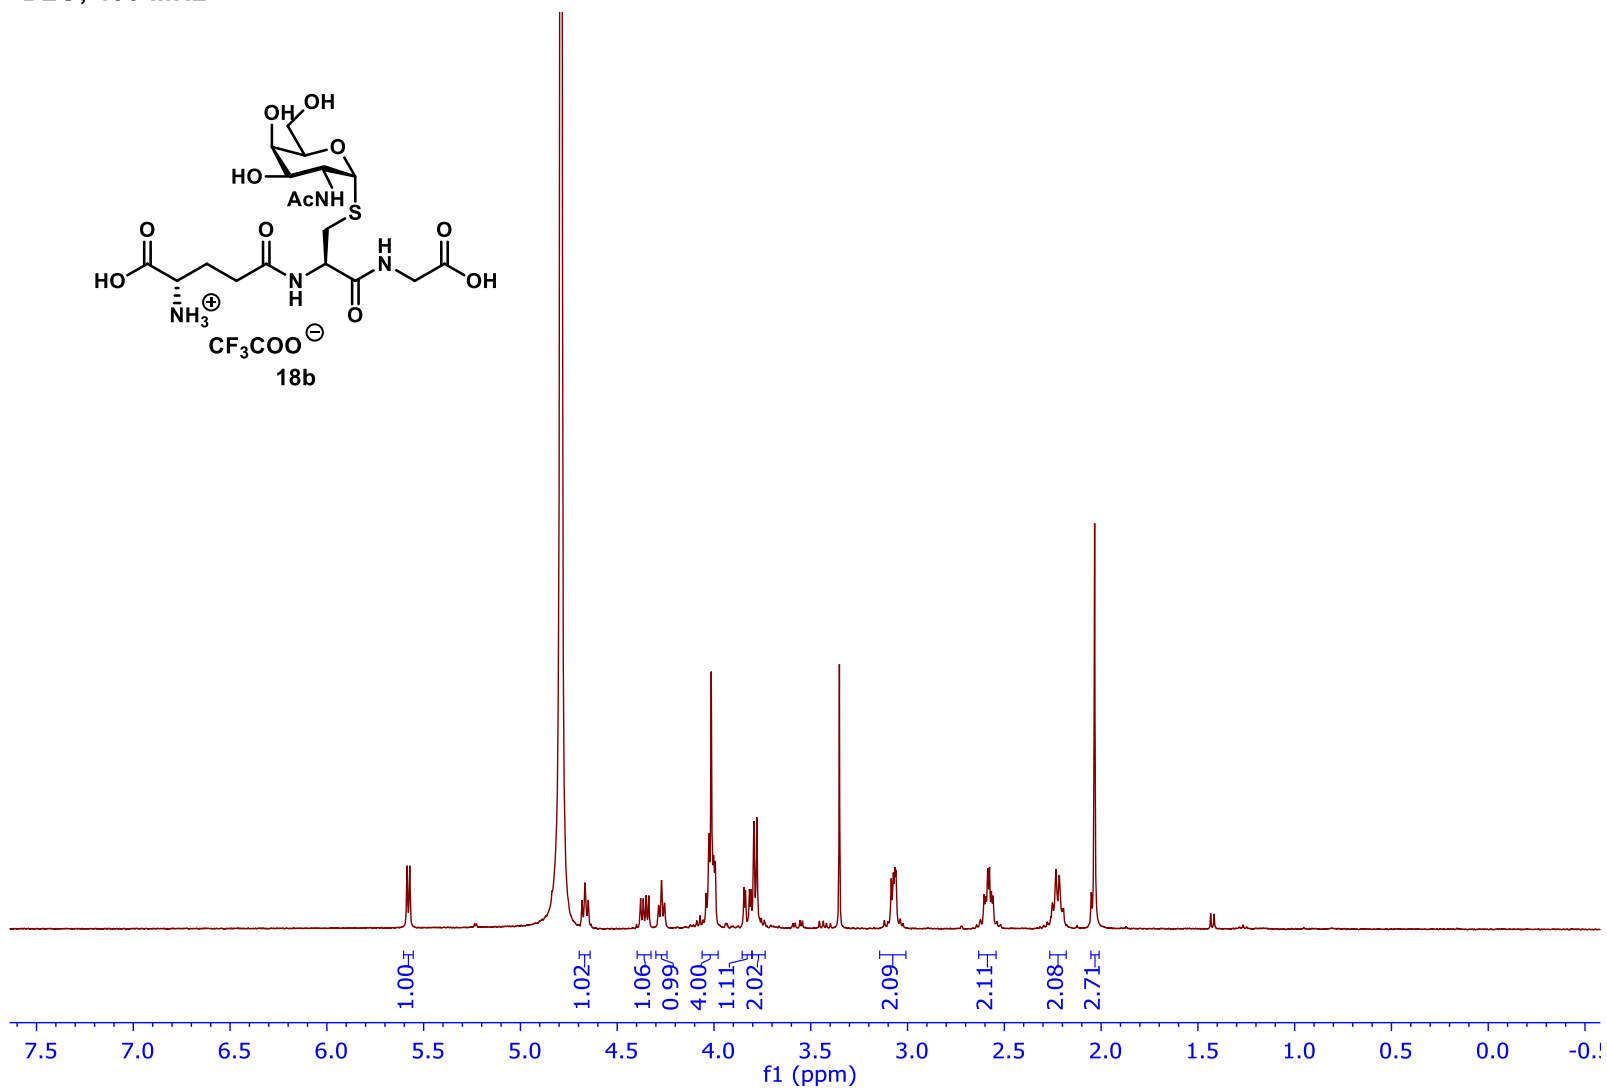

DMSO 400 MHz

174.55  
174.31  
172.88  
172.49  
172.11

114.85  
111.91

84.97

71.78

68.36

67.40

61.10

53.83

52.63

50.04

41.07

32.07

30.95

25.51

21.87

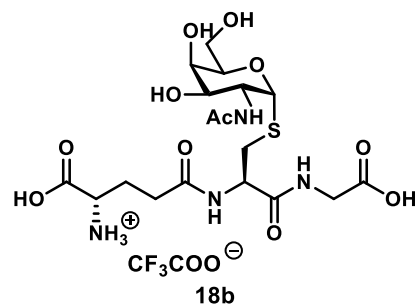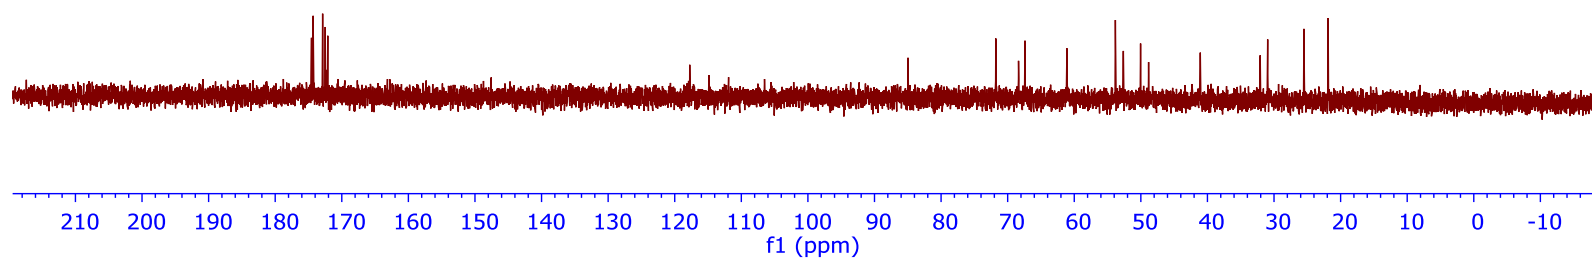

D2O, 376 MHz

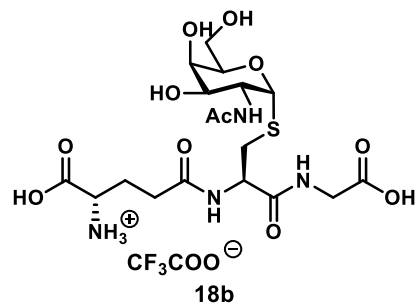

— -75.61

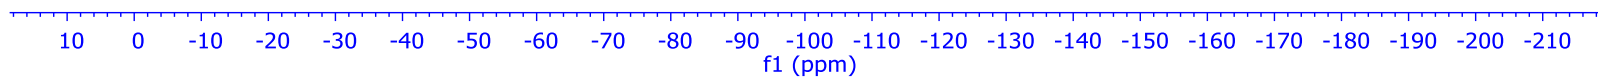

D<sub>2</sub>O, 400 MHz

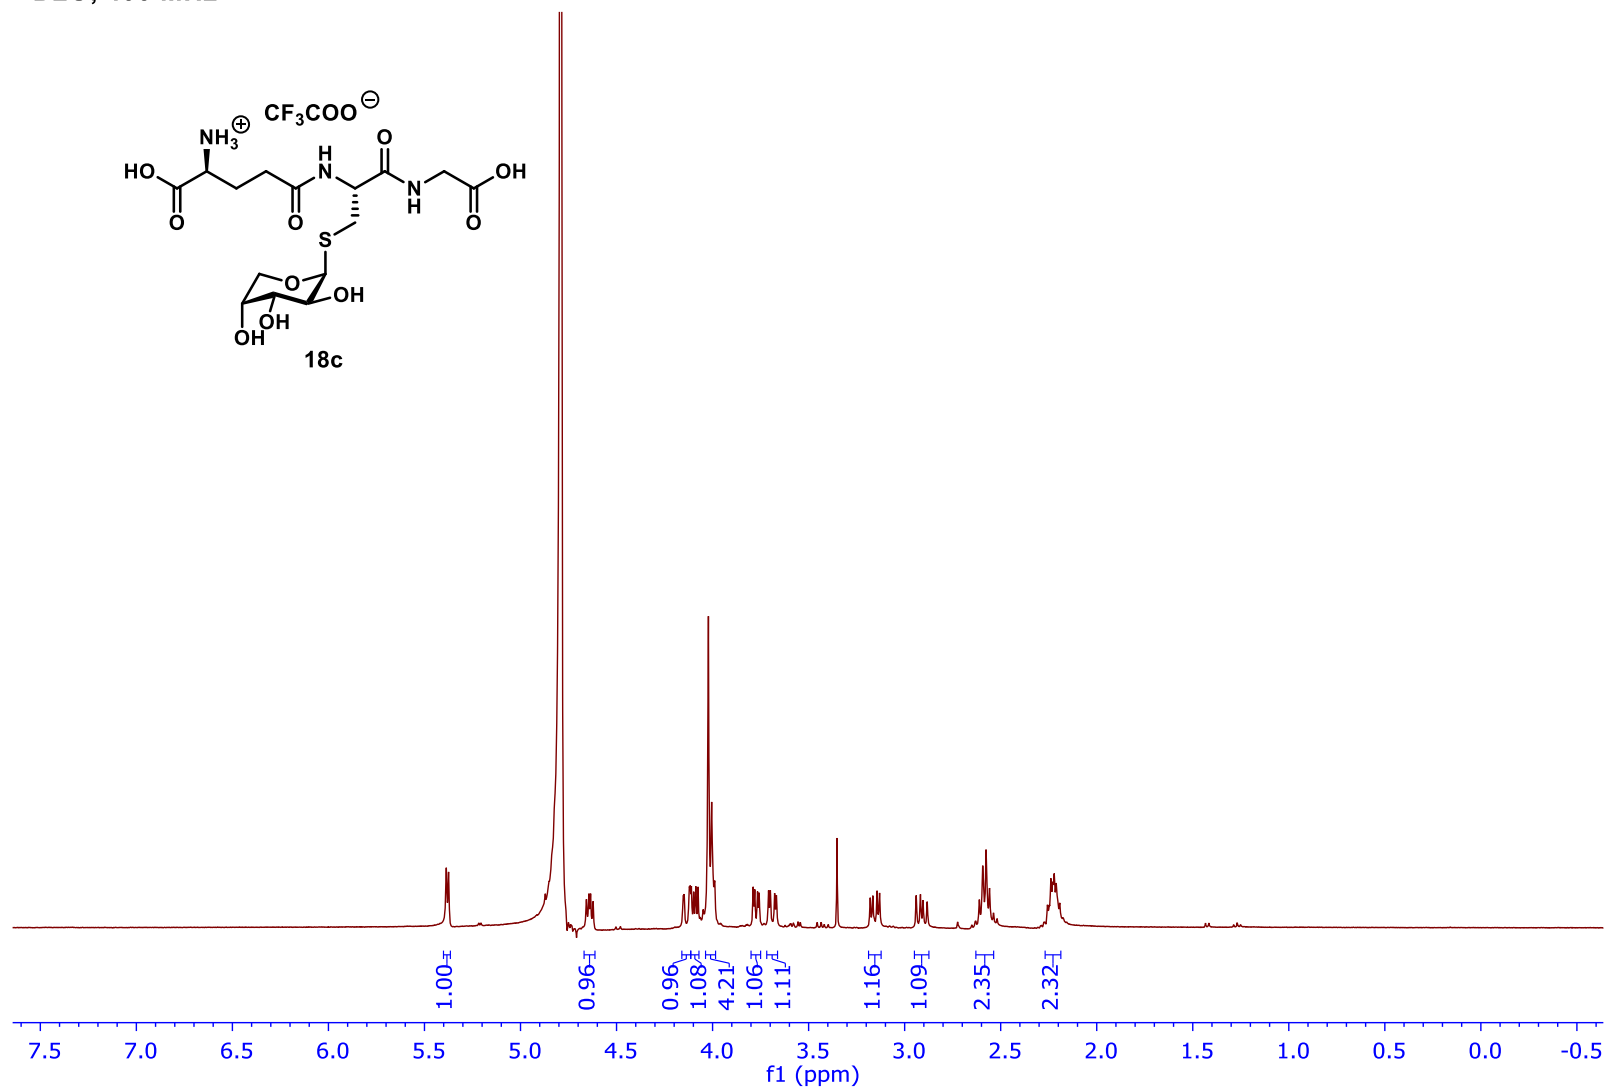

D2O, 101 MHz

174.45  
172.94  
172.60  
172.29  
163.15  
162.79

117.76  
114.86

85.53

69.45  
68.52  
67.76  
63.80

52.98  
52.76

41.14

31.31  
30.99  
25.62

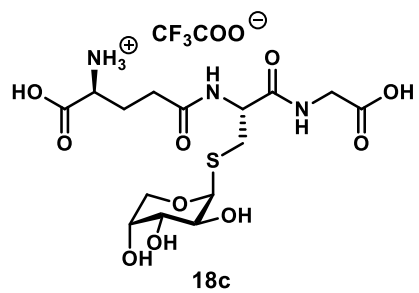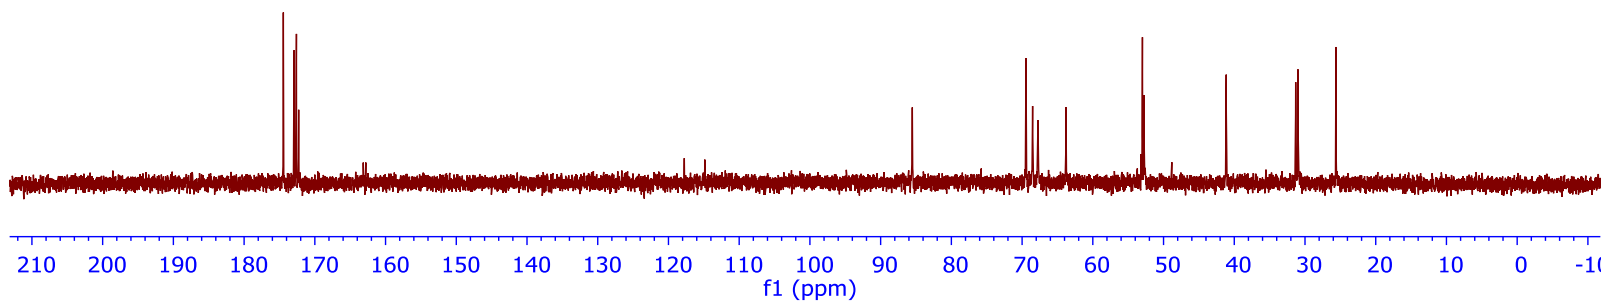

D2O, 376 MHz

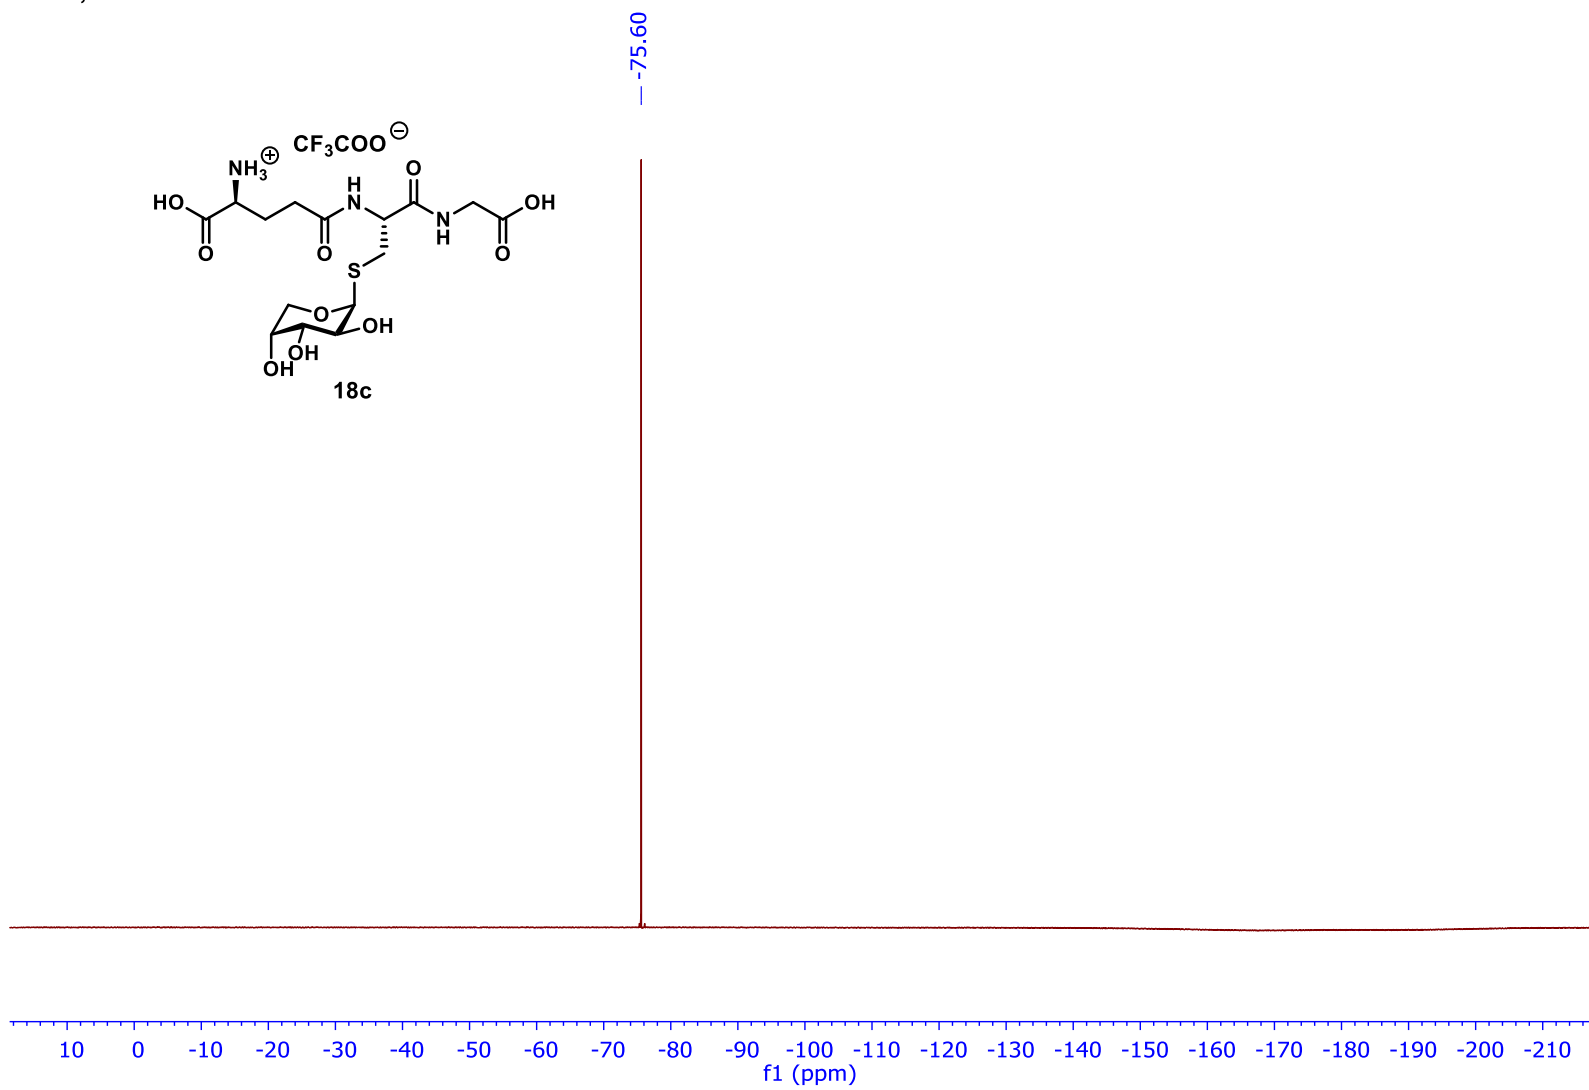

D<sub>2</sub>O, 400 MHz

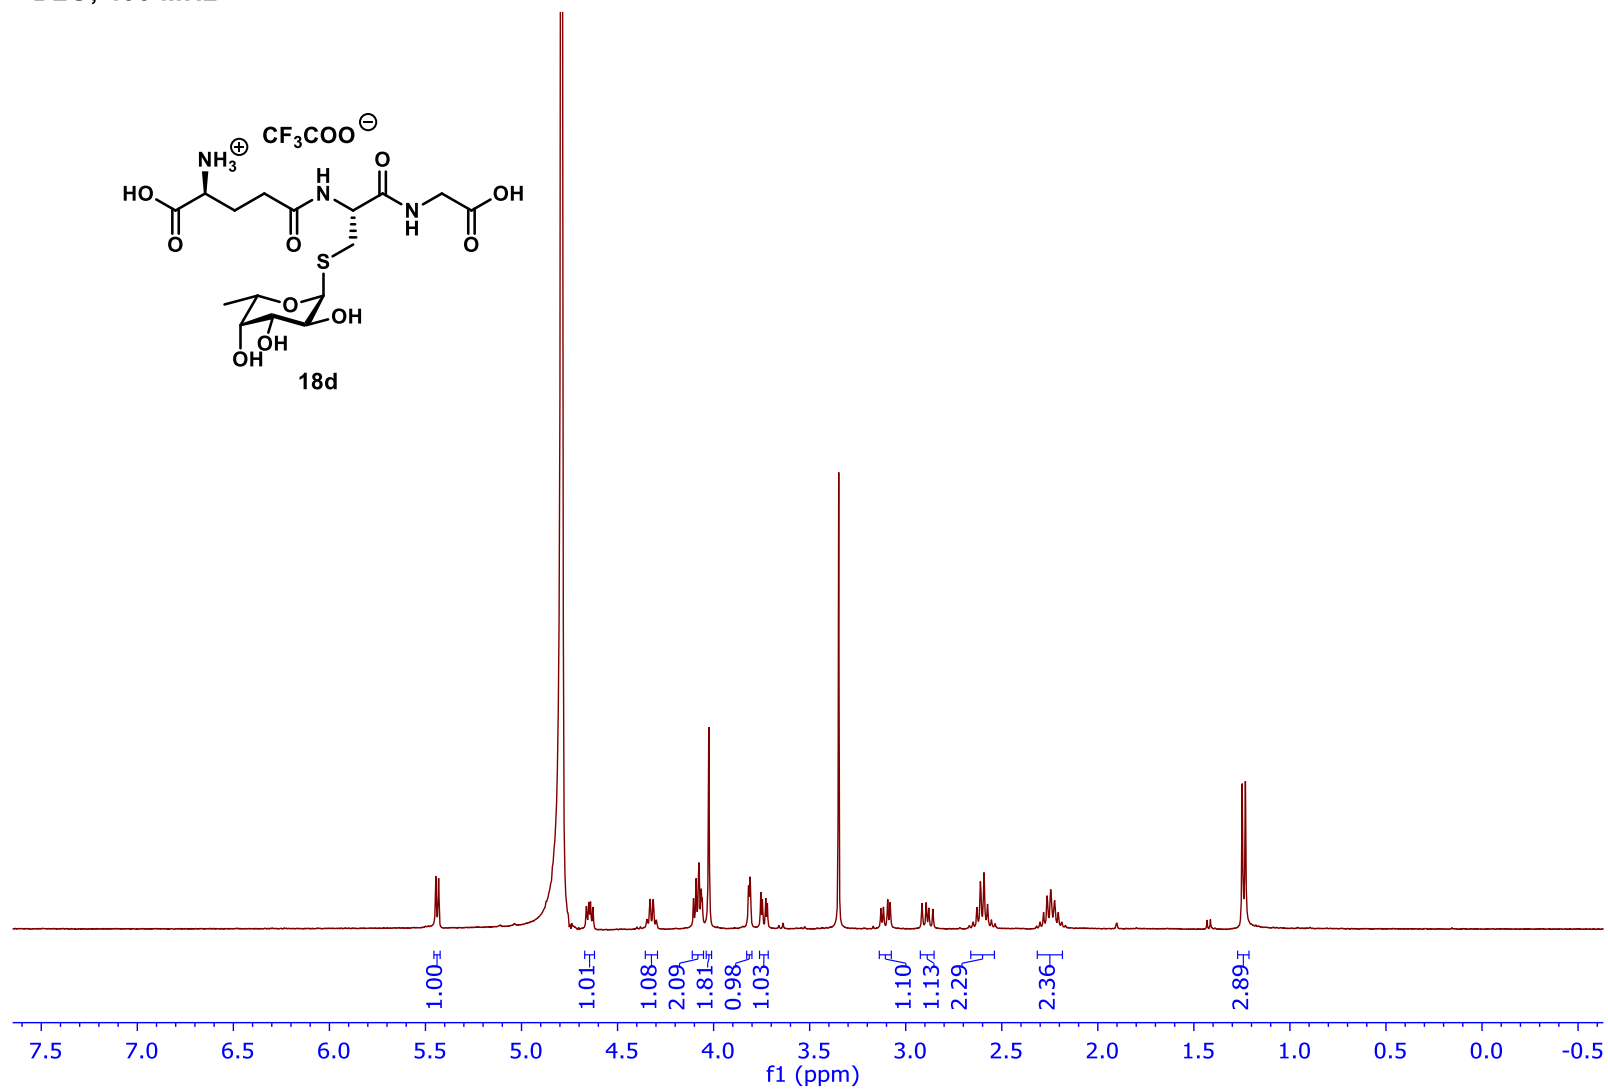

D2O 151 MHz

174.77  
173.30  
172.64

85.33

71.66  
70.27

67.64  
67.59

53.64  
52.86

41.44

31.25  
30.95  
25.98

15.42

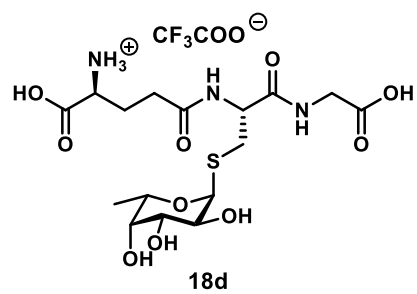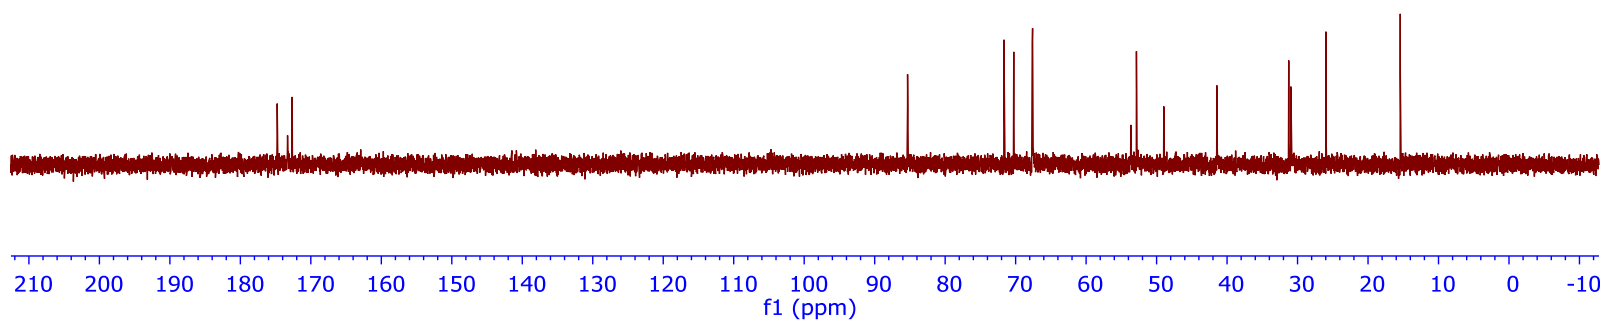

D<sub>2</sub>O, 376 MHz

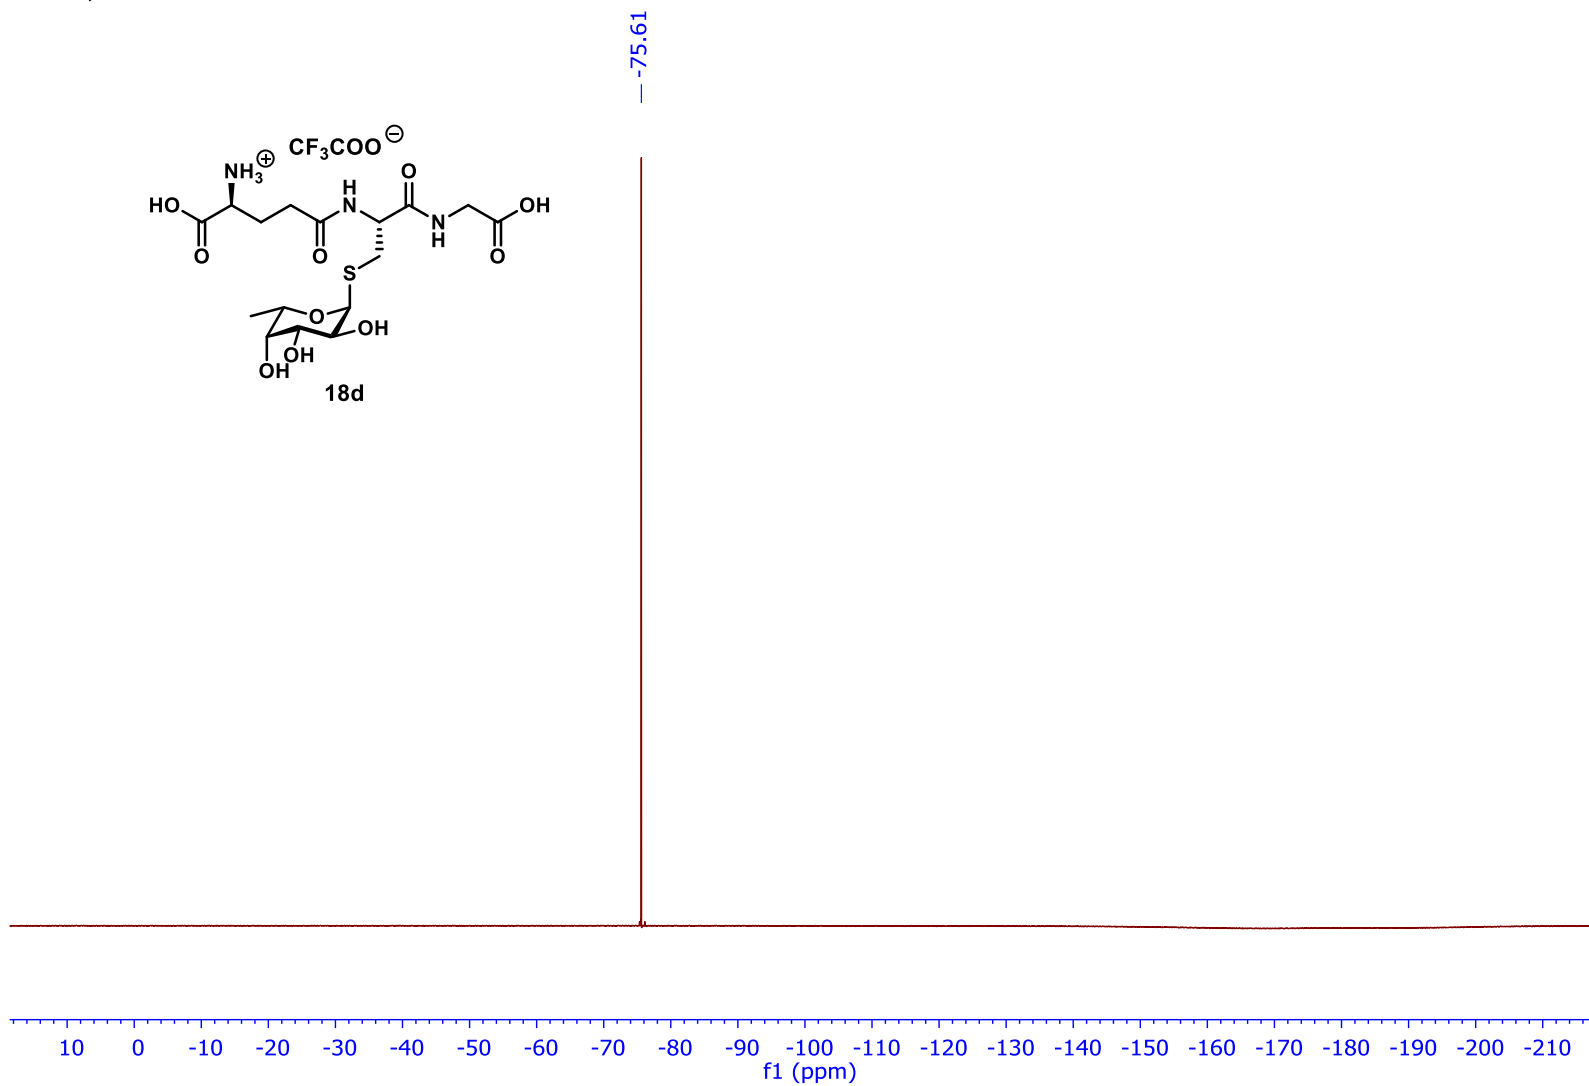

D2O, 600 MHz

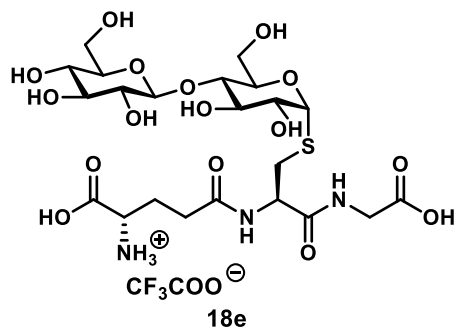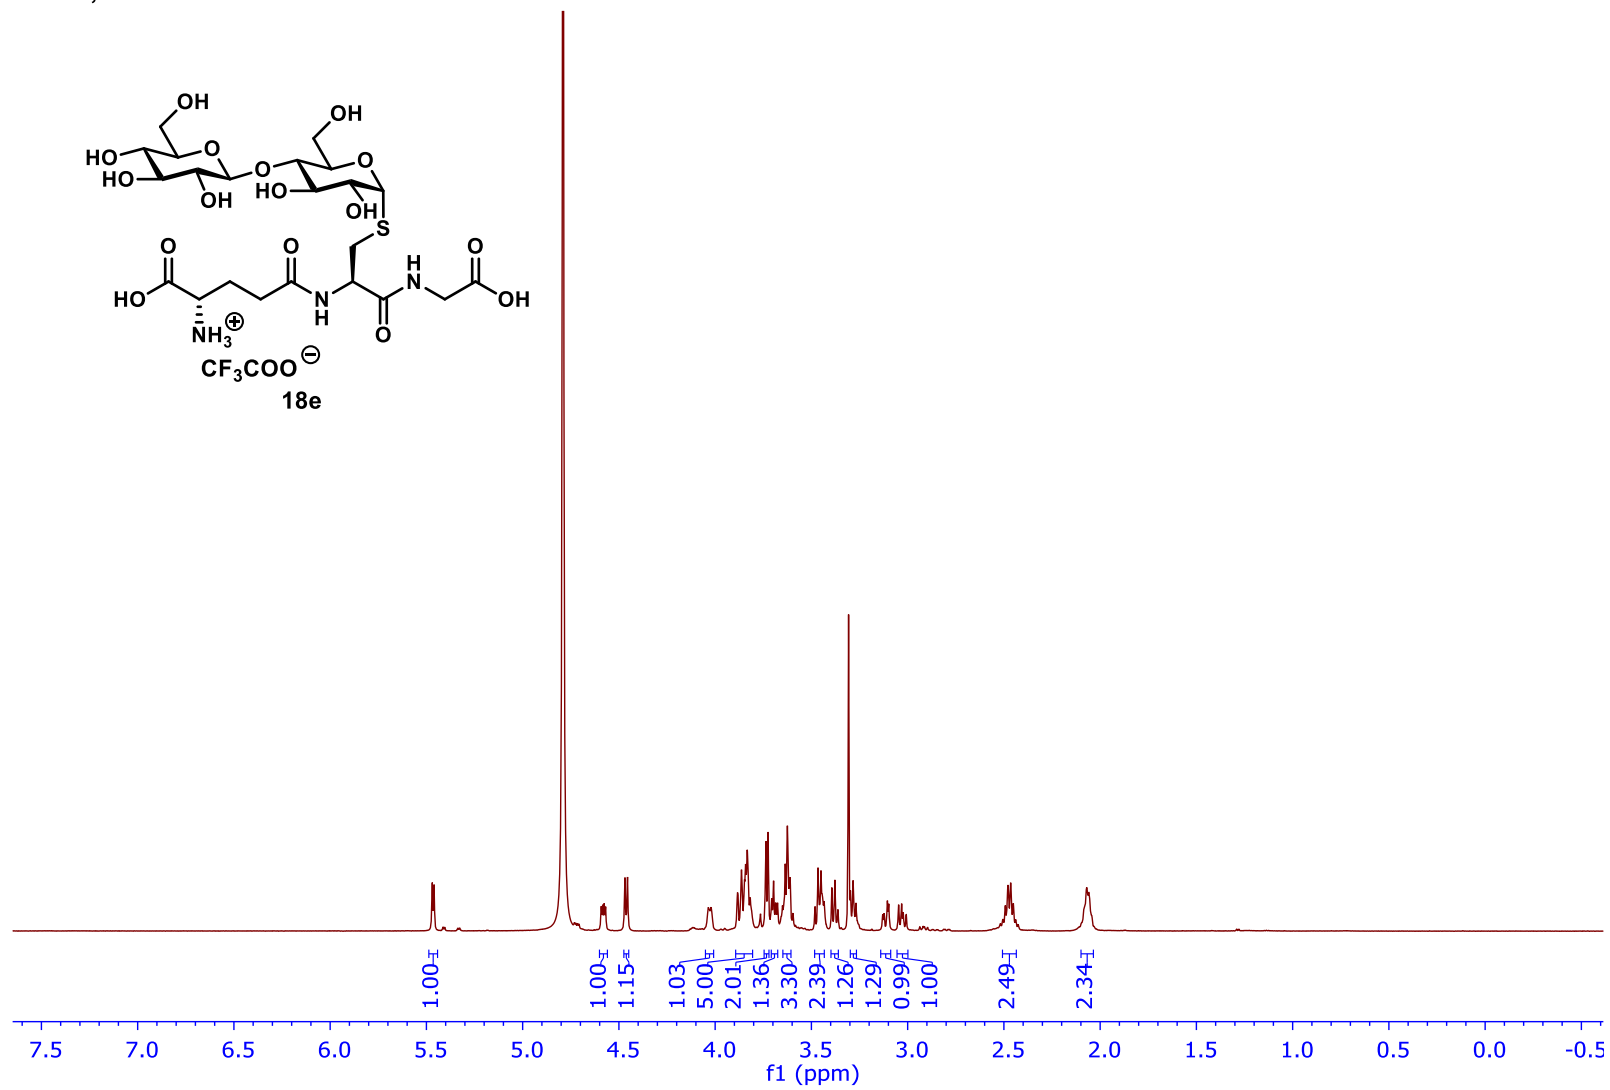

D2O, 151 MHz

176.30  
175.76  
175.30  
171.88  
163.35  
163.12  
162.88  
162.65

119.37  
117.44  
115.51  
113.57

102.69

87.14  
78.78  
76.09  
75.65  
73.25  
72.18  
71.41  
70.87  
69.60  
60.74  
59.86  
54.55  
54.18  
43.52

32.89  
31.81  
27.33

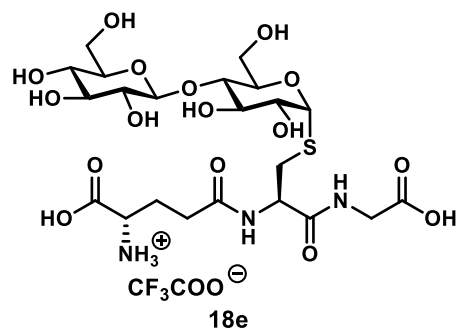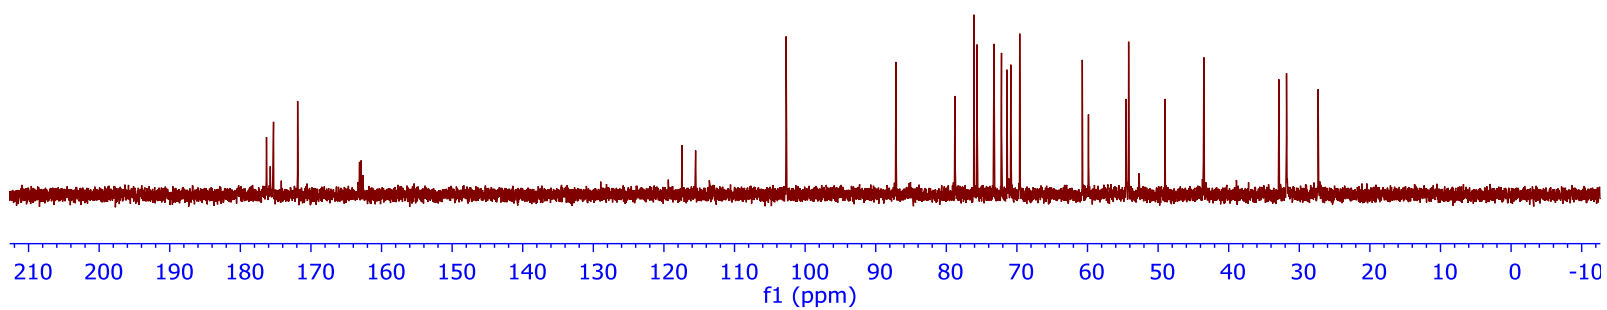

D2O, 376 MHz

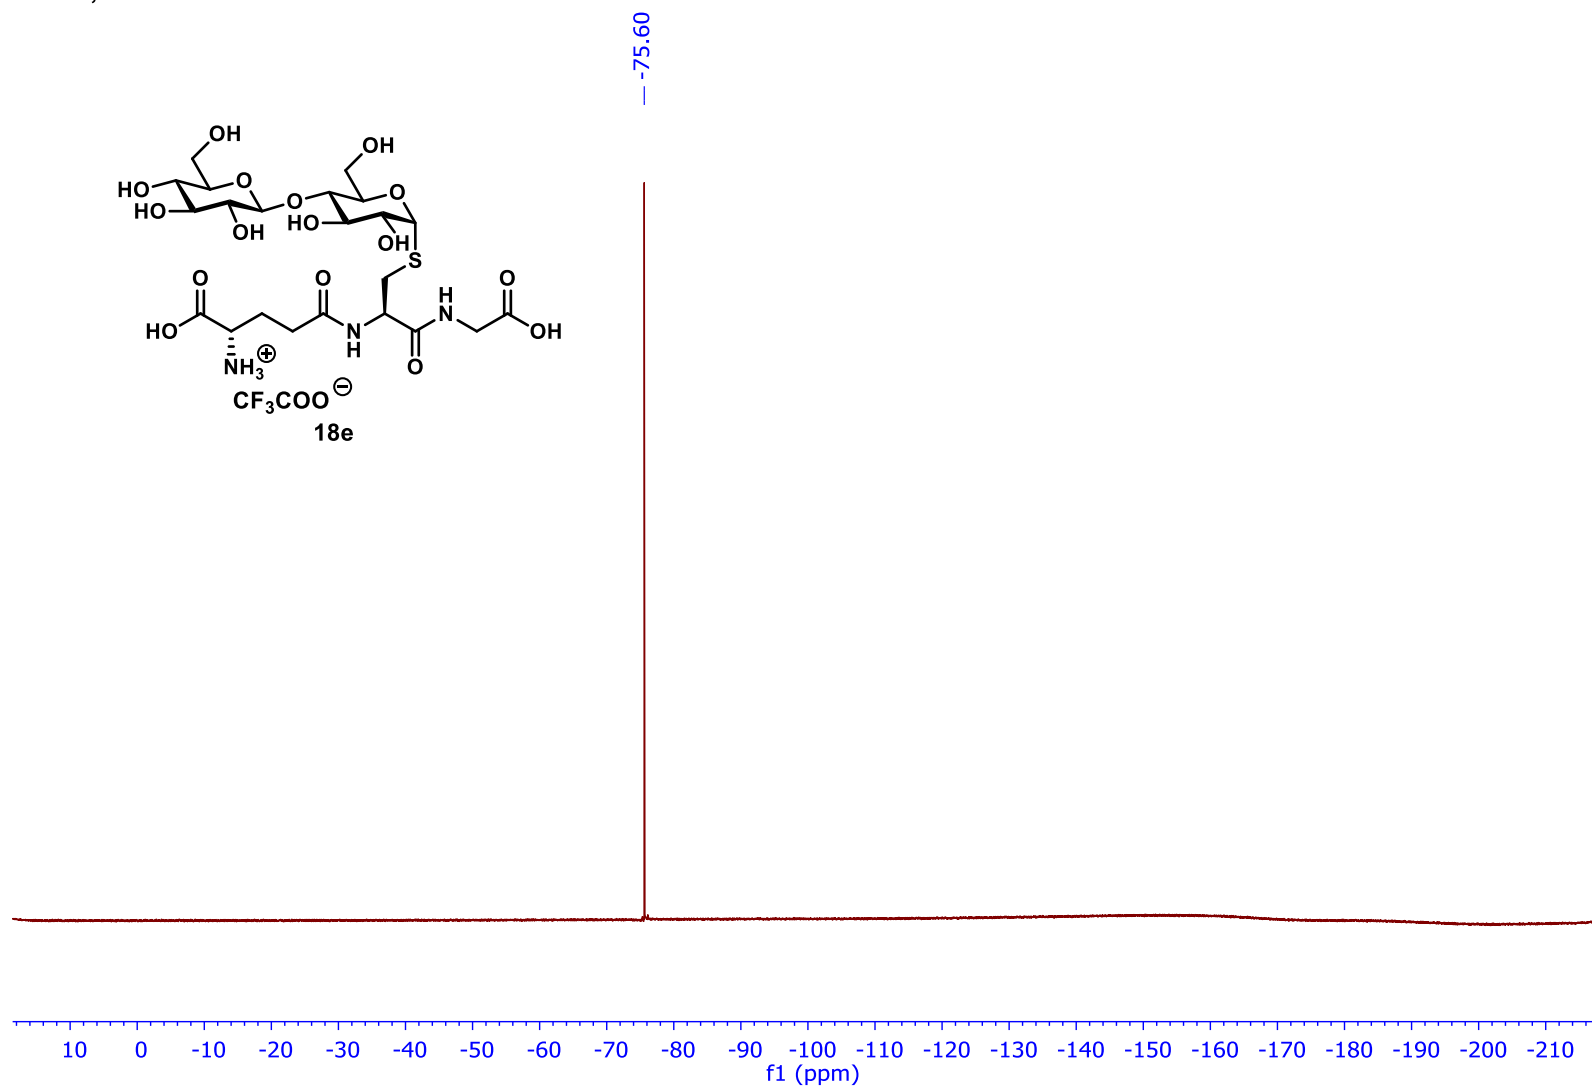

D2O, 800 MHz

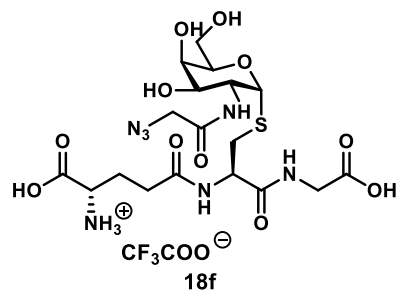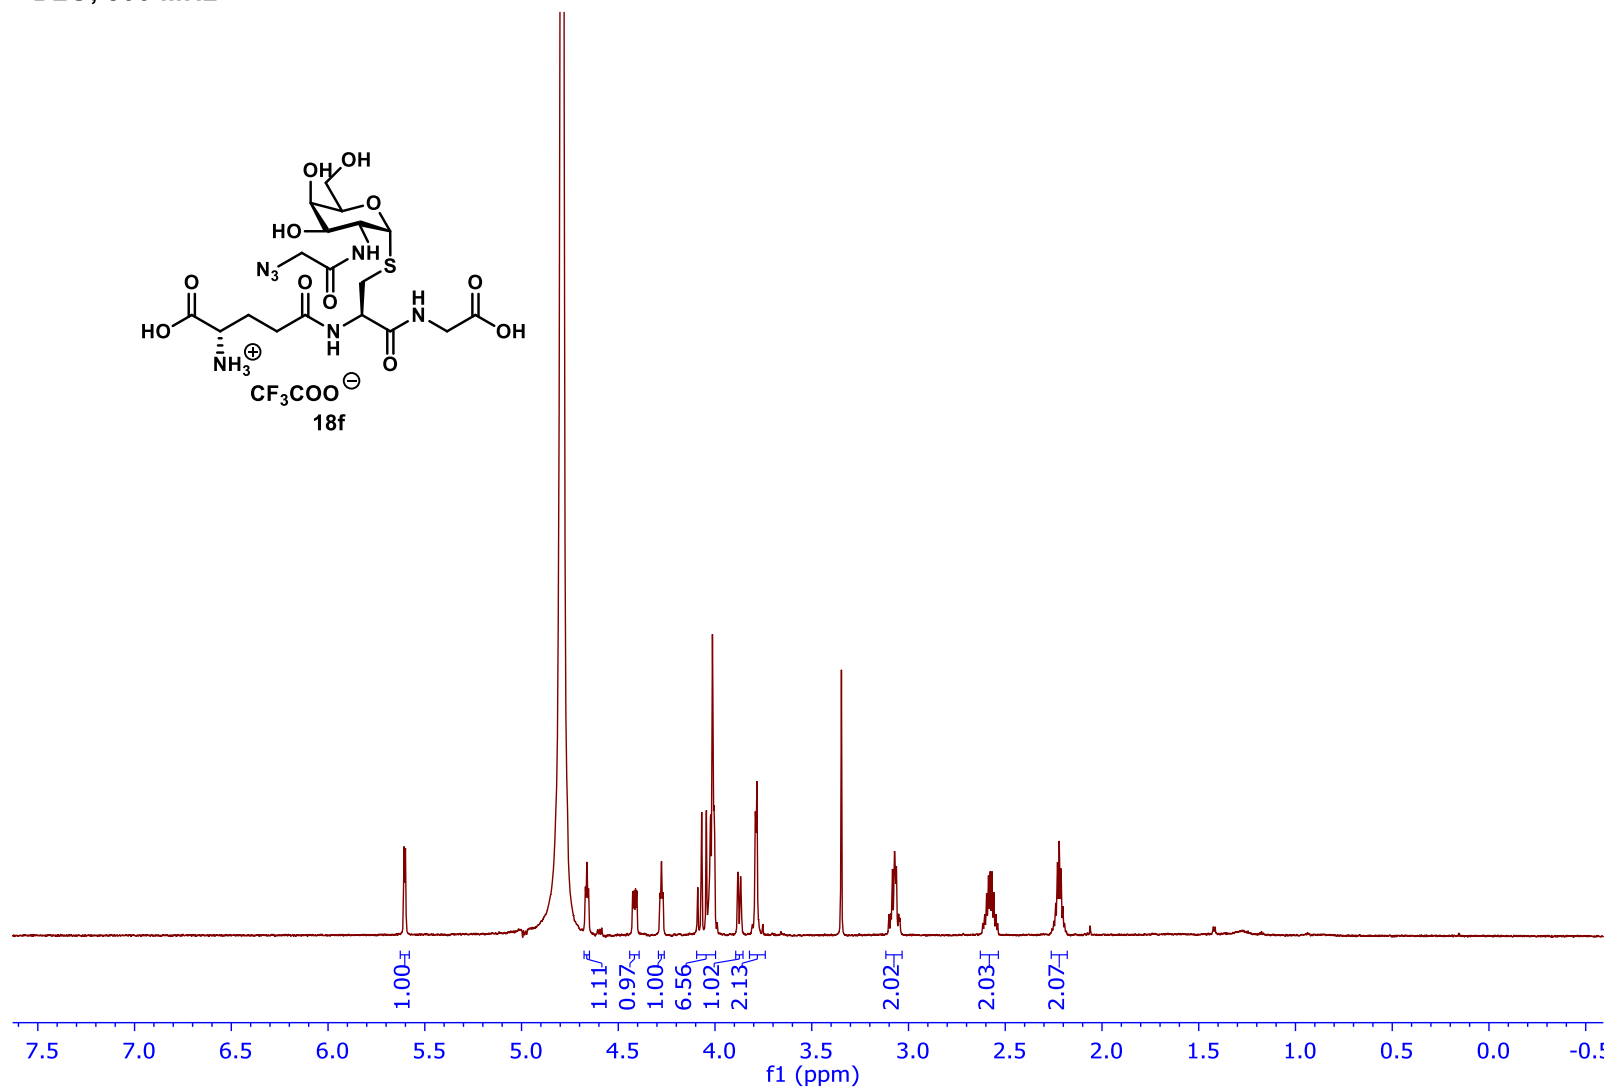

D<sub>2</sub>O, 201 MHz

174.29  
172.86  
172.43  
172.08  
170.83  
163.05  
162.88

117.01  
115.56

84.76

71.83  
68.36  
67.28  
61.08  
53.77  
52.61  
51.69  
50.16  
48.82  
41.06  
32.03  
30.94  
25.49

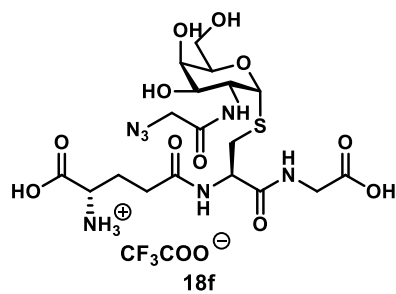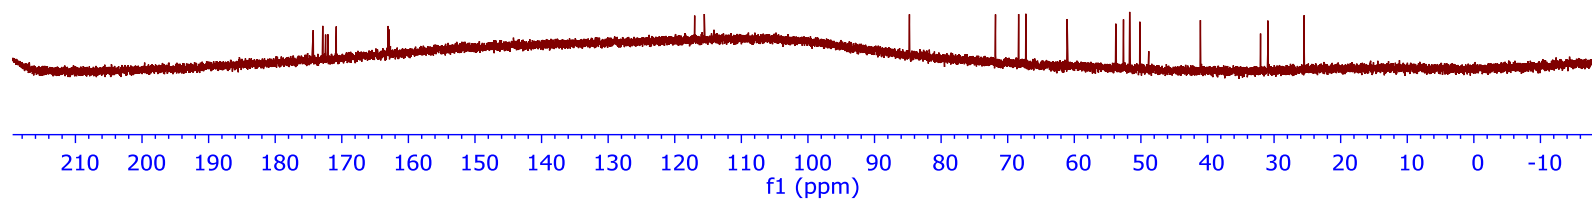

D2O 376 MHz

— -75.60

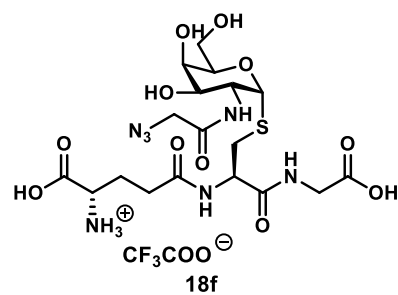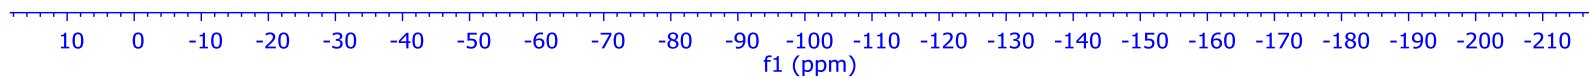

D22O, 800 MHz

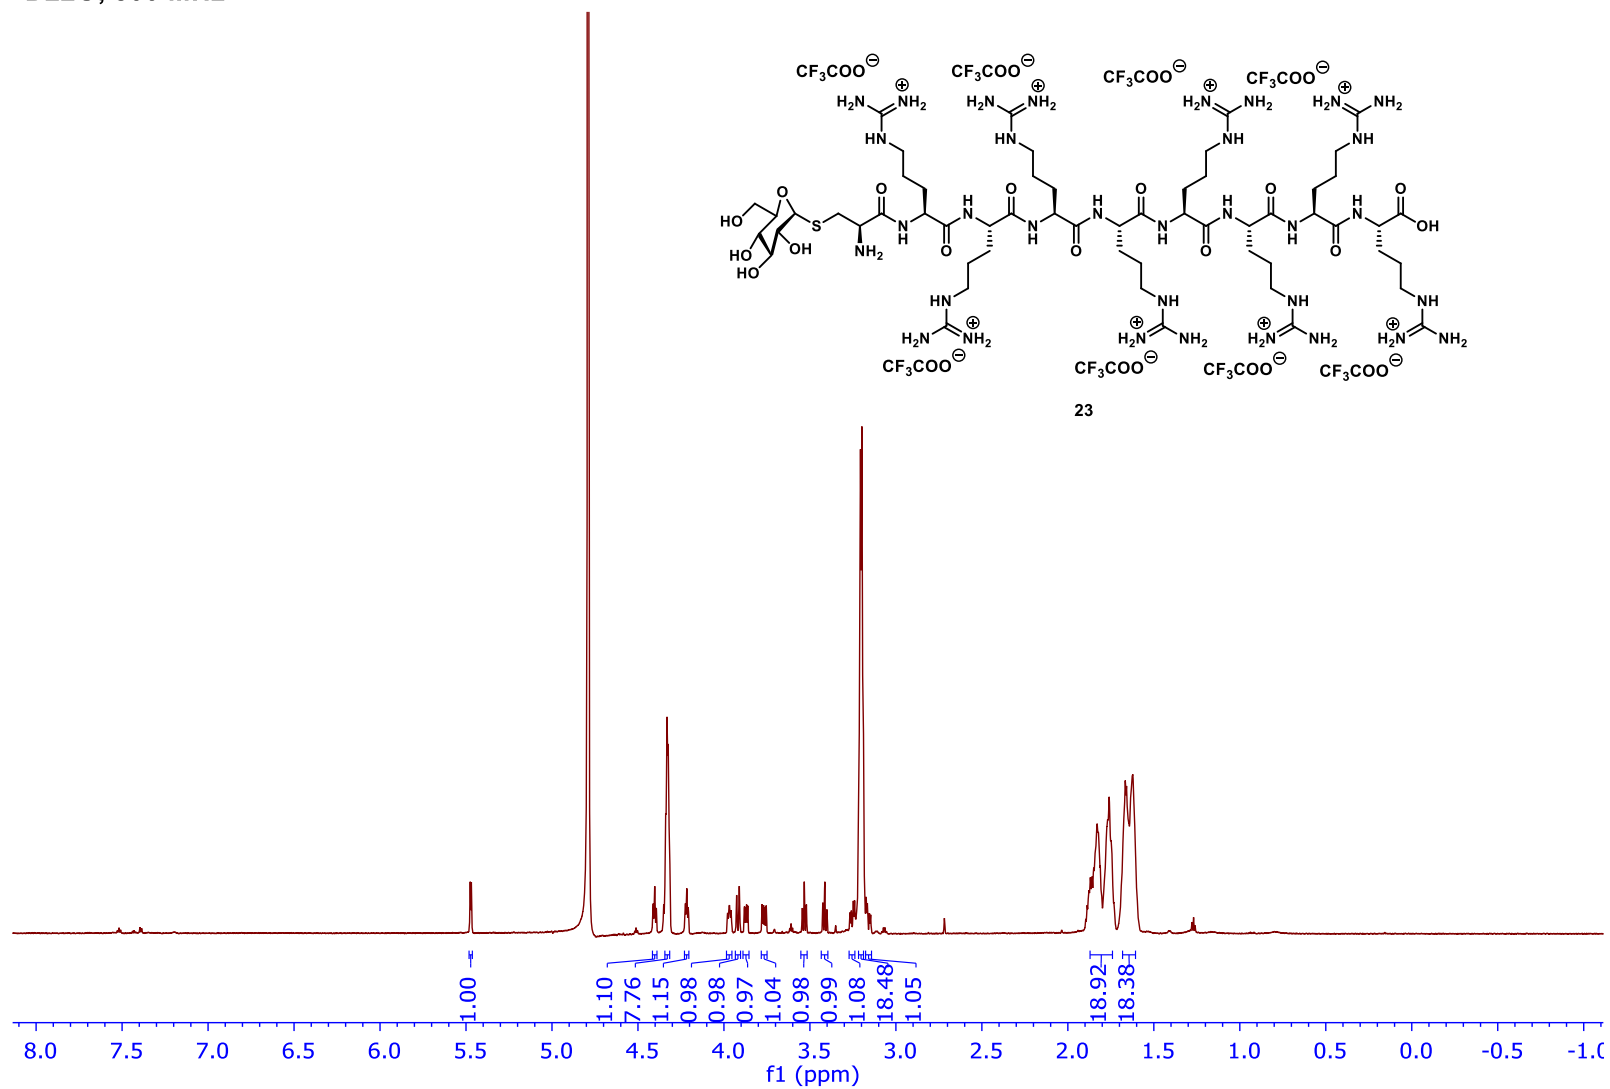

D2O, 201 MHz

177.01  
173.23  
173.22  
173.20  
173.18  
172.80  
172.78  
167.98  
163.19  
163.02  
162.84  
162.66  
156.69  
156.68

118.49  
117.04  
115.59  
114.14

86.16  
73.46  
72.98  
70.78  
69.52  
60.56  
53.45  
53.40  
53.19  
53.16  
52.40  
40.55  
40.50  
28.34  
28.27  
28.25  
28.22  
28.12  
24.49  
24.42  
24.40  
24.37  
24.31  
24.27

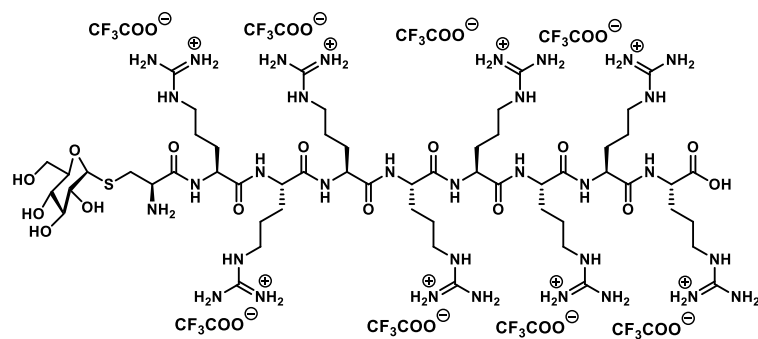

23

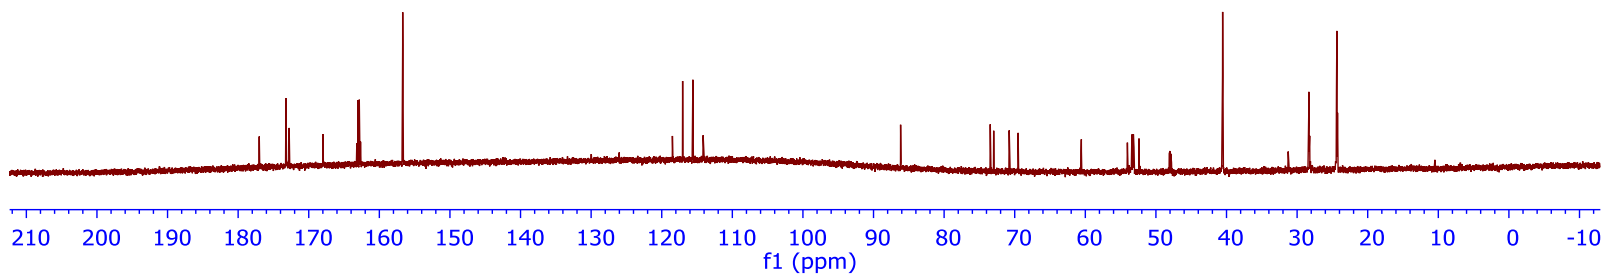

D2O, 376 MHz

— -75.57

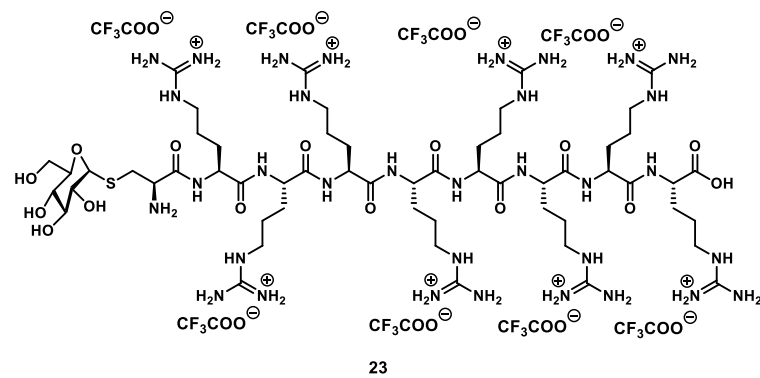

### Supplementary References:

---

1. Kelly, C. B., Patel, N. R., Primer, D. N., Jouffroy, M., Tellis, J. C. & Molander, G. A. *Nat. Prot.* **12**, 472–492 (2017).
2. Becke, A. D. *J. Chem. Phys.* **98**, 5648-5652 (1993).
3. Lee, C., Yang, W. & Parr, R. G. *Phys. Rev. B*, **37**, 785–789 (1988).
4. Frisch, M. J., Trucks, G. W., Schlegel, H. B., Scuseria, G. E., Robb, M. A., Cheeseman, J. R., Scalmani, G., Barone, V., Mennucci, B., Petersson, G. A., Nakatsuji, H., Caricato, M., Li, X., Hratchian, H. P., Izmaylov, A. F., Bloino, J., Zheng, G., Sonnenberg, J. L., Hada, M., Ehara, M., Toyota, K., Fukuda, R., Hasegawa, J., Ishida, M., Nakajima, T., Honda, Y., Kitao, O., Nakai, H., Vreven, T., Montgomery, J. A., Peralta, J. E., Ogliaro, F., Bearpark, M., Heyd, J. J., Brothers, E., Kudin, K. N., Staroverov, V. N., Keith, T., Kobayashi, R., Normand, J., Raghavachari, K., Rendell, A., Burant, J. C., Iyengar, S. S., Tomasi, J., Cossi, M., Rega, N., Millam, J. M., Klene, M., Knox, J. E., Cross, J. B., Bakken, V., Adamo, C., Jaramillo, J., Gomperts, R., Stratmann, R. E., Yazyev, O., Austin, A. J., Cammi, R., Pomelli, C., Ochterski, J. W., Martin, R. L., Morokuma, K., Zakrzewski, V. G., Voth, G. A., Salvador, P., Dannenberg, J. J., Dapprich, S., Daniels, A. D., Farkas, O., Foresman, J. B., Ortiz, J. V., Cioslowski, J. & Fox, D. J. Gaussian 09, revision D.01; Gaussian, Inc.: Wallingford, CT, 2013.
